# Supplementary material for: Synthesis, In Silico and In Vitro Evaluation for Acetylcholinesterase and BACE-1 Inhibitory Activity of Some N-Substituted-4-Phenothiazine-Chalcones
Source: PubMed Central journal article supplement (PMC7504348; doi:10.3390/molecules25173916), 2020-08-27
Supplement: molecules-25-03916-s001.pdf [file molecules-25-03916-s001.pdf]

## SUPPORTING INFORMATION

# Synthesis, In Silico and In Vitro Evaluation for Acetylcholinesterase and BACE-1 Inhibitory Activity of Some *N*-Substituted-4-Phenothiazine-Chalcones

Thai-Son Tran <sup>1,2,a</sup>, Minh-Tri Le <sup>1,3,a,\*</sup>, Thi-Cam-Vi Nguyen <sup>4</sup>, The-Huan Tran <sup>2</sup>, Thanh-Dao Tran <sup>1</sup> and Khac-Minh Thai <sup>1,\*</sup>

<sup>1</sup> Department of Medicinal Chemistry, Faculty of Pharmacy, University of Medicine and Pharmacy at Ho Chi Minh City, Ho Chi Minh City 700000, Vietnam; tson@huemed-univ.edu.vn; daott@ump.edu.vn

<sup>2</sup> Department of Pharmaceutical Chemistry, Faculty of Pharmacy, College of Medicine and Pharmacy, Hue University, Hue City 530000, Vietnam; thuan@hueuni.edu.vn

<sup>3</sup> School of Medicine, Vietnam National University Ho Chi Minh City, 700000 Ho Chi Minh City, Vietnam

<sup>4</sup> Ton Duc Thang University, Nguyen Huu Tho St., Tan Phong Ward, Dist. 7, Ho Chi Minh City 70000, Viet Nam; nguyenthicamvi@tdtu.edu.vn

<sup>a</sup> T-S T and M-T. L contributed equally to this work and are co-first authors.

\* Correspondence: thaikhacminh@gmail.com, thaikhacminh@ump.edu.vn (K-M. T) and leminhtri@ump.edu.vn (M-T L). Tel.: +84-903-718-190 (M-T.L.); +84-28-3855-2225 or +84-909-680-385 (K-M.T.); Fax: +84-28-3822-5435 (K-M.T.)

**Table S1.** Results of re-docking (RMSD in Å)

**Table S2:** Docking results and ligand interaction (Co-crystallized 1DX6)

**Table S3.** Docking results and ligand interaction (Co-crystallized 5HU1 chain A and B)

**Table S4.** Dataset of 72 compounds used in the building of 2D-QSAR model for AChE inhibitors

**Table S5.** Dataset of 215 compounds used in the building of 2D-QSAR model for BACE-1 inhibitors

**Table S6.** Equations for calculation of 2D-QSAR validation metrics

**Table S7.** Selected descriptors used for building 2D-QSAR models

**Table S8.** Values of selected descriptors used in prediction of pIC<sub>50</sub> of the synthesized chalcone derivatives (AChE)

**Table S9.** Values of selected descriptors used in prediction of pIC<sub>50</sub> of the synthesized chalcone derivatives (BACE-1)

**Table S10.** Spectra of synthesized chalcone derivatives

**Figure S1.** Interactions of co-crystallized ligand in the protein complex 1DX6 (2D)

**Figure S2.** Interactions of co-crystallized ligand in the protein complex 1DX6 (3D)

**Figure S3.** Alignment of re-dock ligands with the native one in the binding pocket of of 1DX6

**Figure S4.** Interactions of co-crystallized ligand in the protein complex 5HU1-chain A (2D)

**Figure S5.** Interactions of co-crystallized ligand in the protein complex 5HU1-chain A (3D)

**Figure S6.** Alignment of re-dock ligands with the native one in the binding pocket of of 5HU1-chain A

**Figure S7.** Interactions of co-crystallized ligand in the protein complex 5HU1-chain B (2D)

**Figure S8.** Interactions of co-crystallized ligand in the protein complex 5HU1-chain B (3D)

**Figure S9.** Alignment of re-dock ligands with the native one in the binding pocket of of 5HU1-chain B

**Figure S10.** The linear regression between docking score and  $pIC_{50}$  on AChE of synthesized chalcone derivatives (A. observed values from **AC1-3** and **AC5-10**, B. predicted values from **AC1, AC4, AC6, AC8, AC10, AC13**)

**Table S1.** Results of re-docking (RMSD in Å)

| Ligand | AChE | BACE-1         |                |
|--------|------|----------------|----------------|
|        | 1DX6 | 5HU1 (chain A) | 5HU1 (chain B) |
| 1      | 0.49 | 0.71           | 0.53           |
| 2      | 0.50 | 0.52           | 0.87           |
| 3      | 0.89 | 0.89           | 0.96           |

- *Ligand 1: separated from the complex (native form, not prepared).*
- *Ligand 2: separated from the complex and re-prepared using appropriate procedure indicated in the section of Materials and Methods*
- *Ligand 3: built and prepared from the beginning.*

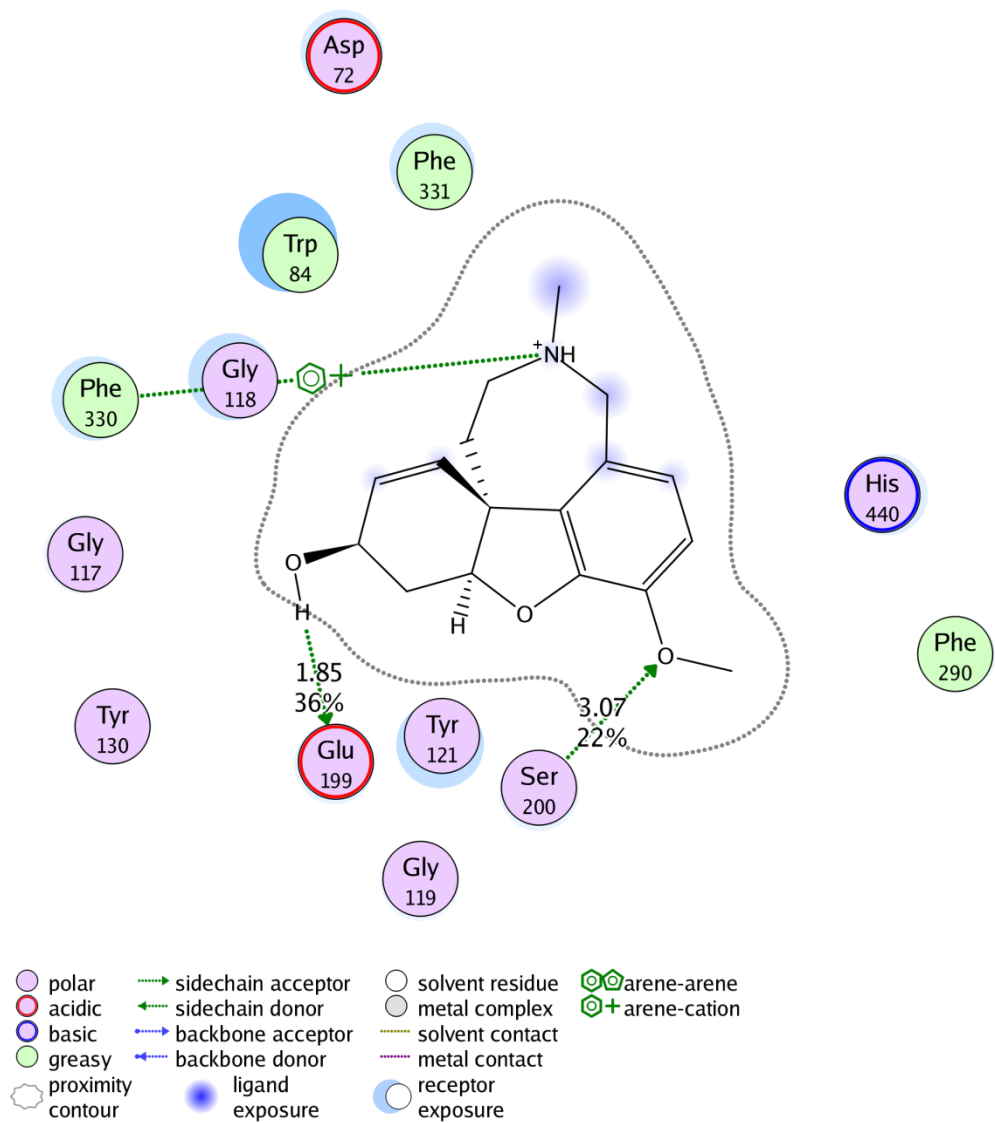

**Figure S1.** Interactions of co-crystallized ligand in the protein complex 1DX6 (2D)

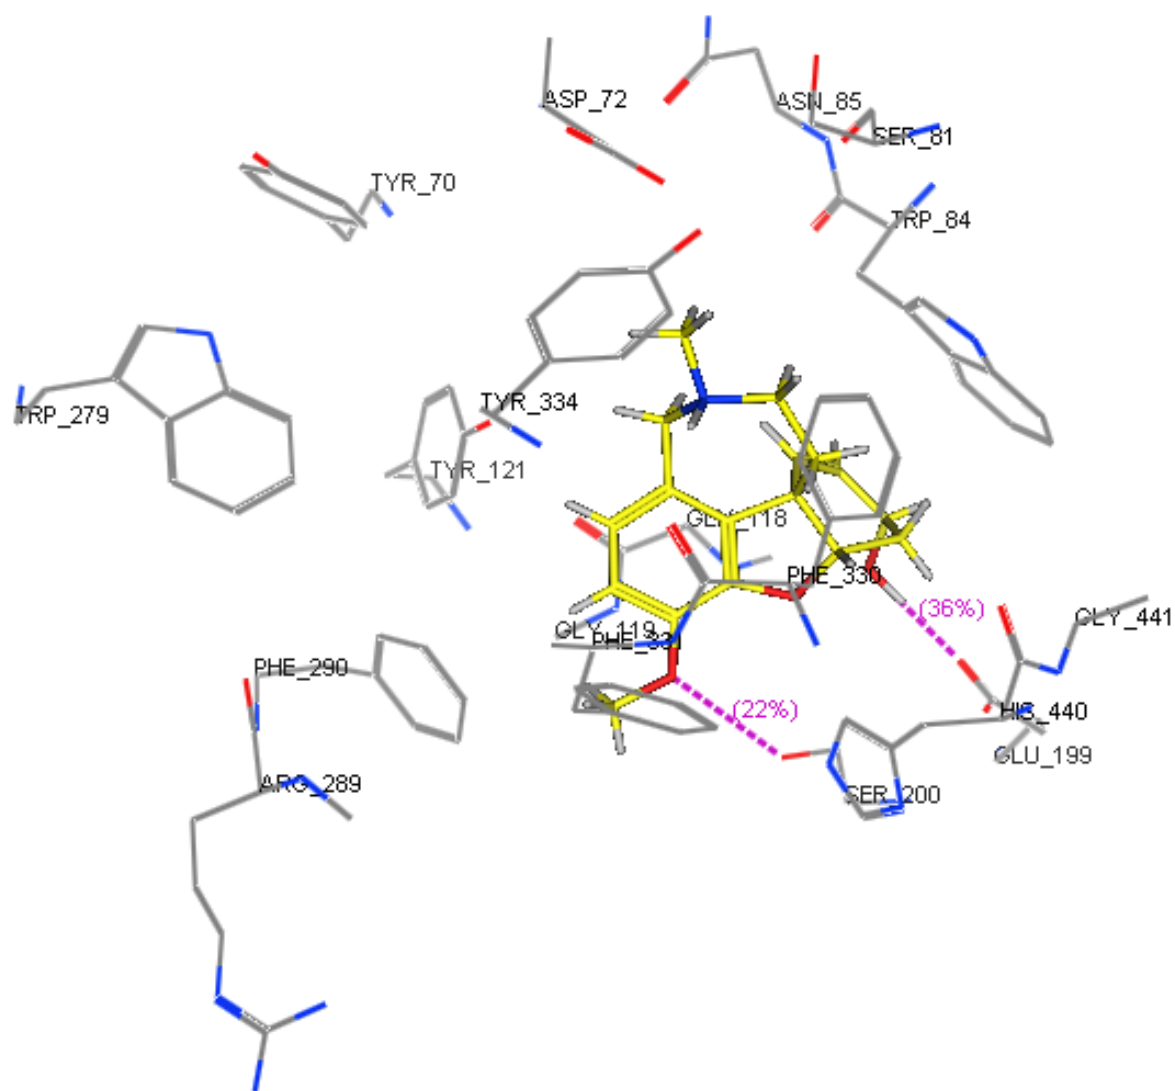

**Figure S2.** Interactions of co-crystallized ligand in the protein complex 1DX6 (3D)

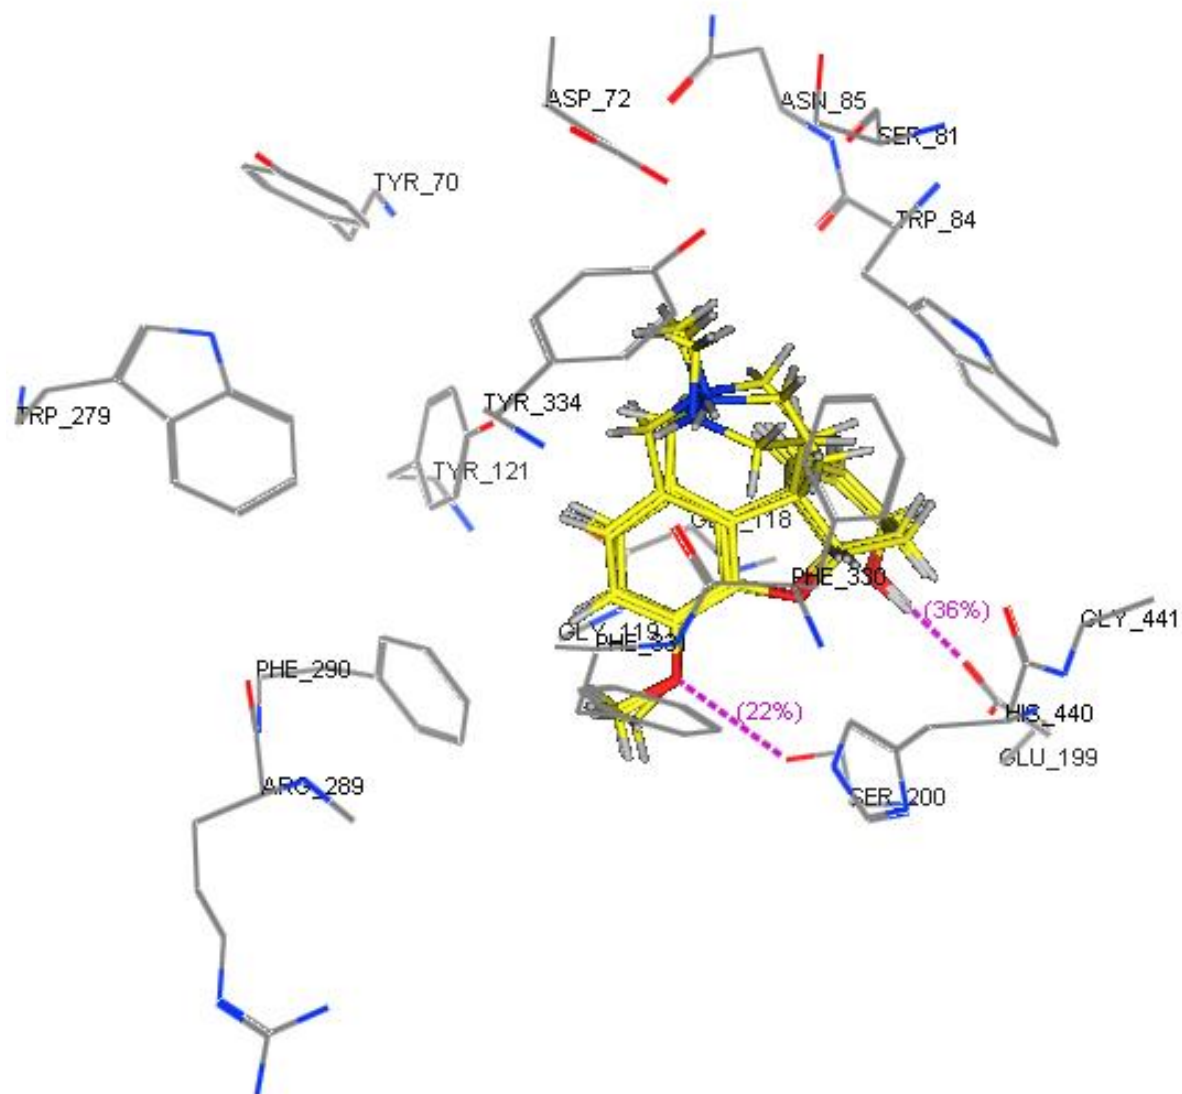

**Figure S3.** Alignment of re-dock ligands with the native one in the binding pocket of 1DX6

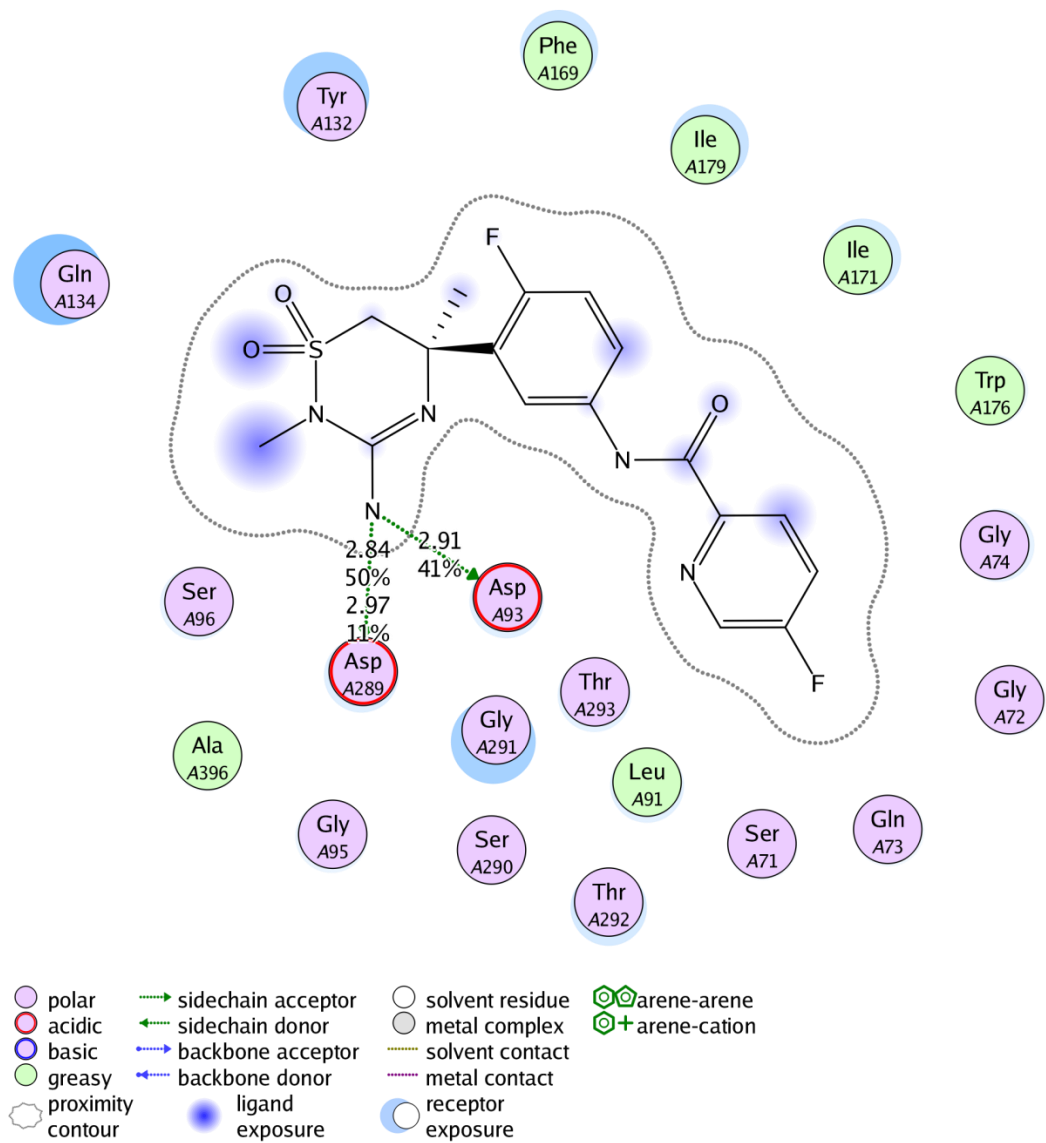

**Figure S4.** Interactions of co-crystallized ligand in the protein complex 5HU1-chain A (2D)

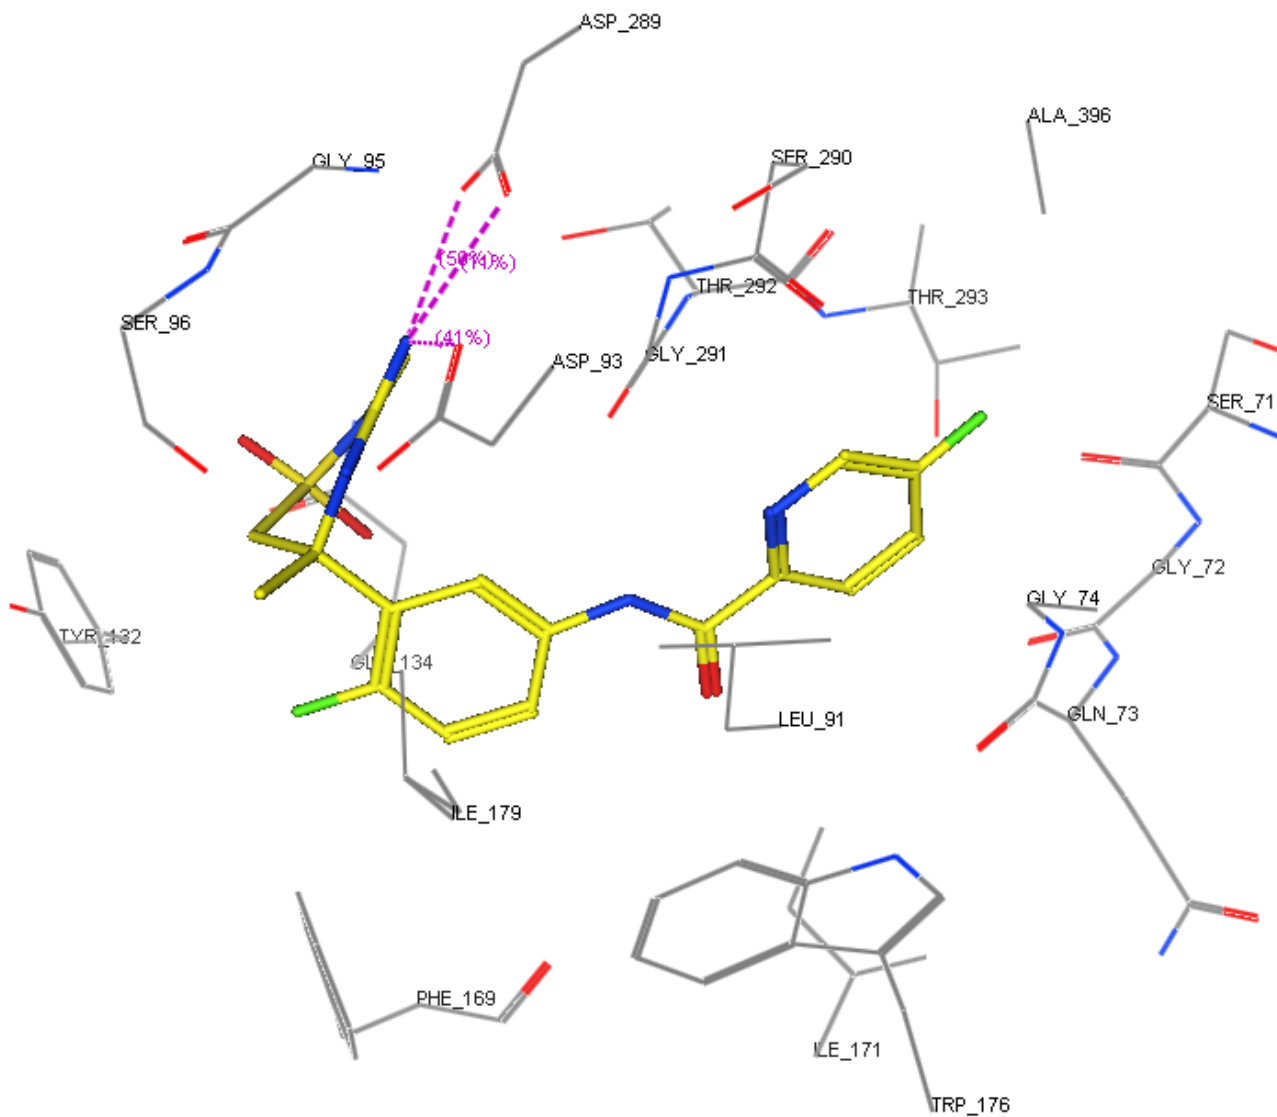

**Figure S5.** Interactions of co-crystallized ligand in the protein complex 5HU1-chain A (3D)



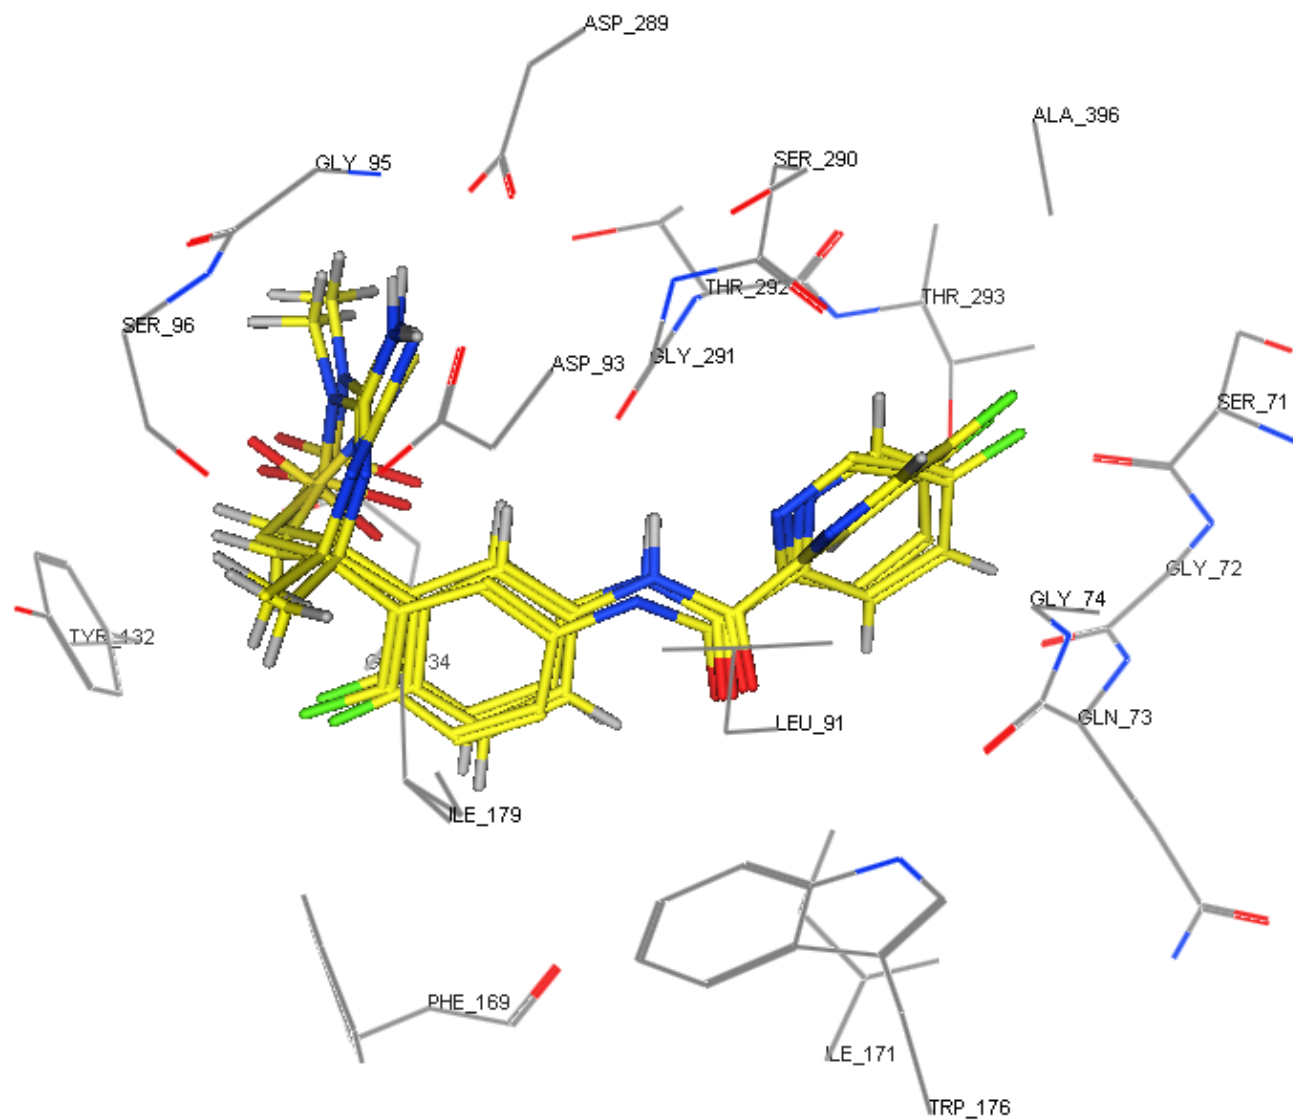

**Figure S6.** Alignment of re-dock ligands with the native one in the binding pocket of of 5HU1-chain A

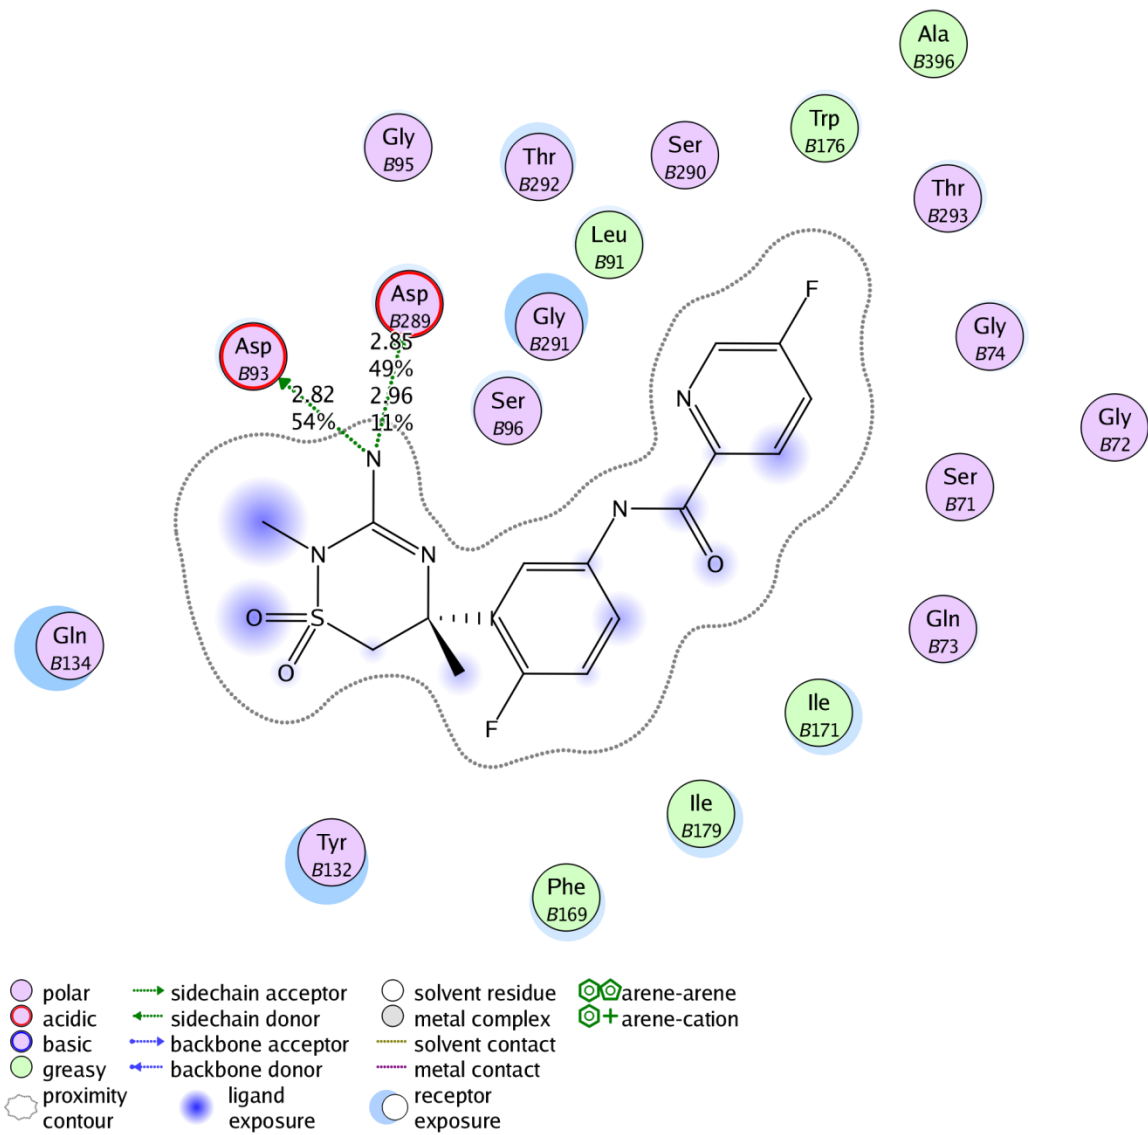

**Figure S7.** Interactions of co-crystallized ligand in the protein complex 5HU1-chain B (2D)

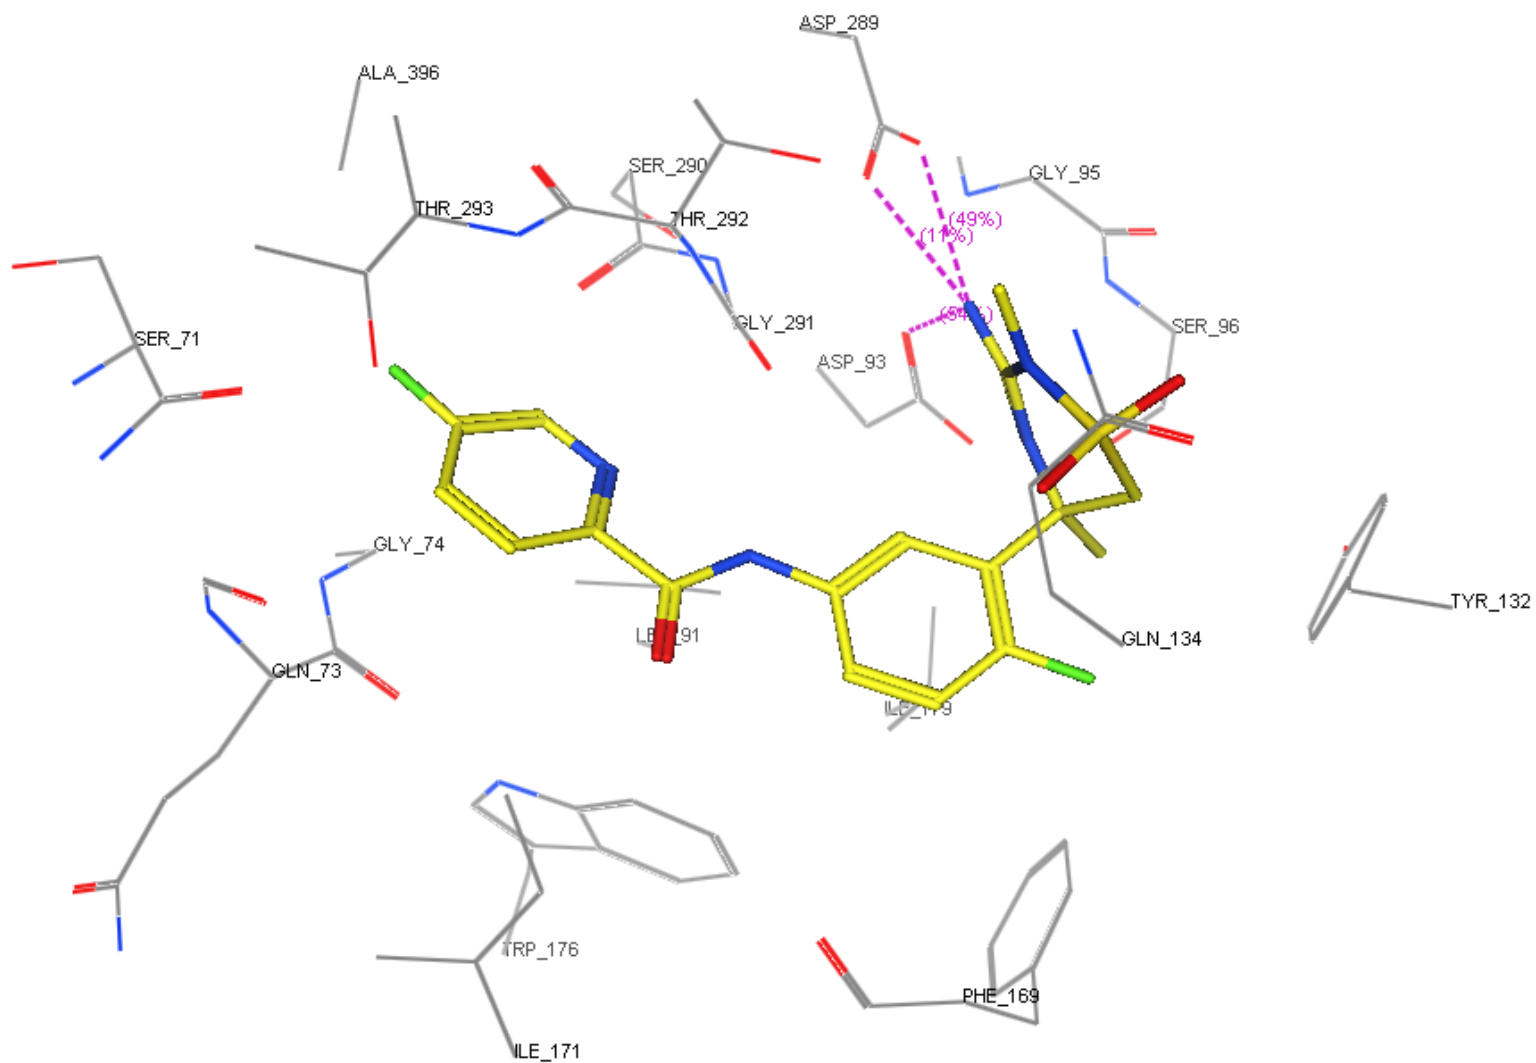

**Figure S8.** Interactions of co-crystallized ligand in the protein complex 5HU1-chain B (3D)

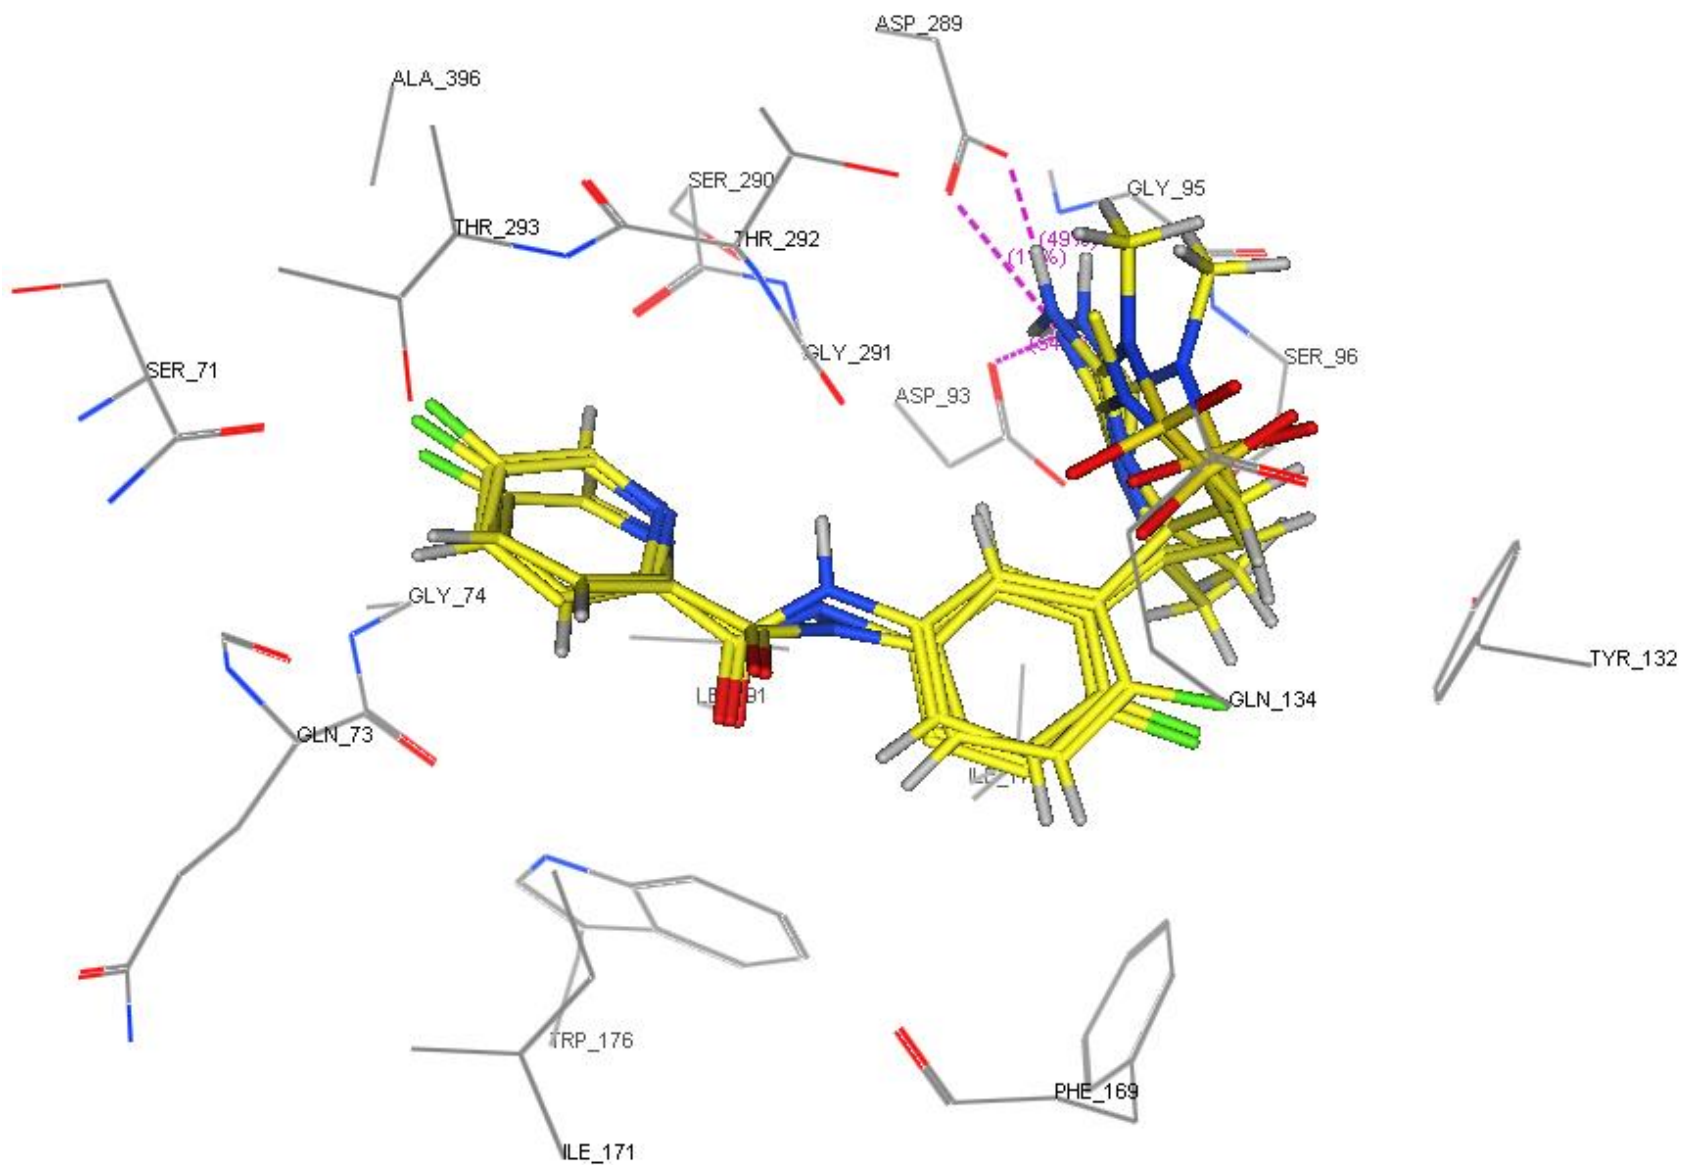

**Figure S9.** Alignment of re-dock ligands with the native one in the binding pocket of of 5HU1-chain B

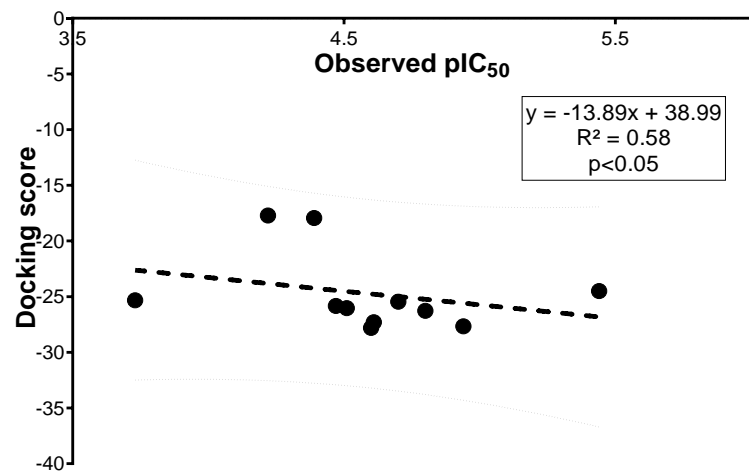

(A)

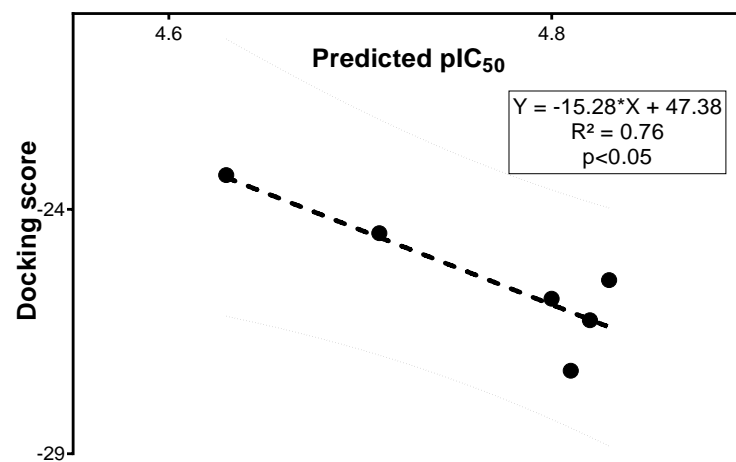

(B)

**Figure S10.** The linear regression between docking score and pIC<sub>50</sub> on AChE of synthesized chalcone derivatives (A. observed values from AC1-3 and AC5-10, B. predicted values from AC1, AC4, AC6, AC8, AC10, AC13)

**Table S2: Docking results and ligand interaction (Co-crystallized 1DX6)**

| Compound | pIC <sub>50</sub> |           | Docking score (kJ.mol <sup>-1</sup> ) | Ligand interaction                                                            |
|----------|-------------------|-----------|---------------------------------------|-------------------------------------------------------------------------------|
|          | Observed          | Predicted |                                       |                                                                               |
| AC1      | 4.47              | 4.80      | -25.83                                | <p>Trp84 (arene-arene), Asp72 (hydrogen bond, score: 9%, length: 2.14 Å )</p> |

|     |      |      |        |                                                                                                                                                                                                  |
|-----|------|------|--------|--------------------------------------------------------------------------------------------------------------------------------------------------------------------------------------------------|
| AC2 | 4.51 | 4.74 | -26.03 | 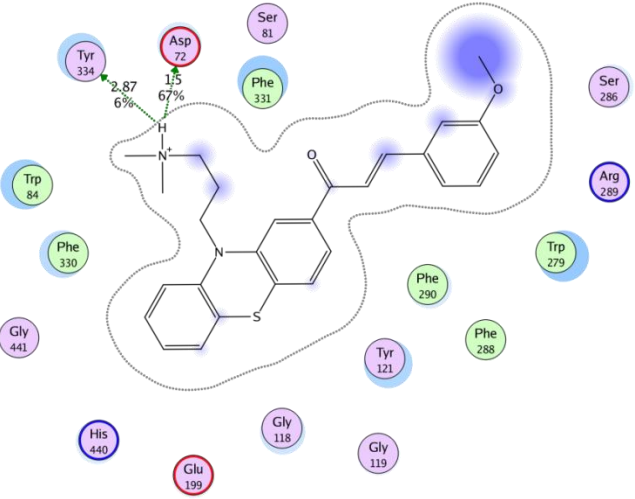 <p>Tyr334 (hydrogen bond, score: 6%, length: 2.87 Å ), Asp72 (hydrogen bond, score: 67%, length: 1.5 Å )</p> |
| AC3 | 4.94 | 4.74 | -27.67 |  <p>Trp279 (arene-arene), Asp72 (hydrogen bond, score: 61%, length: 1.51 Å )</p>                             |

|     |      |      |        |                                                                                                                                                                    |
|-----|------|------|--------|--------------------------------------------------------------------------------------------------------------------------------------------------------------------|
| AC4 | 5.44 | 4.71 | -24.49 | 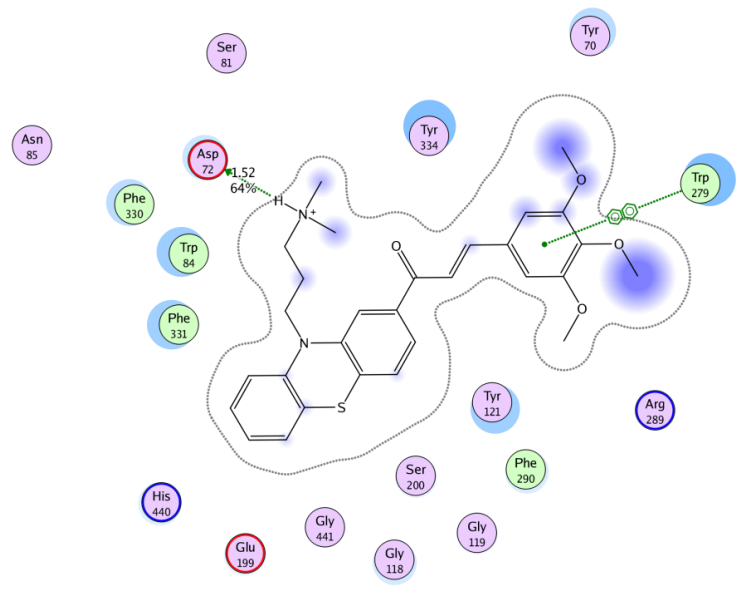 <p>Trp279 (arene-arene), Asp72 (hydrogen bond, score: 64%, length: 1.52 Å)</p> |
| AC5 | 4.22 | 4.82 | -17.71 |  <p>Tyr334 (arene-arene; hydrogen bond, score 10%, length: 2.12 Å)</p>         |



|     |      |      |        |                                                                                                                                                                                           |
|-----|------|------|--------|-------------------------------------------------------------------------------------------------------------------------------------------------------------------------------------------|
| AC6 | 4.70 | 4.83 | -25.45 | 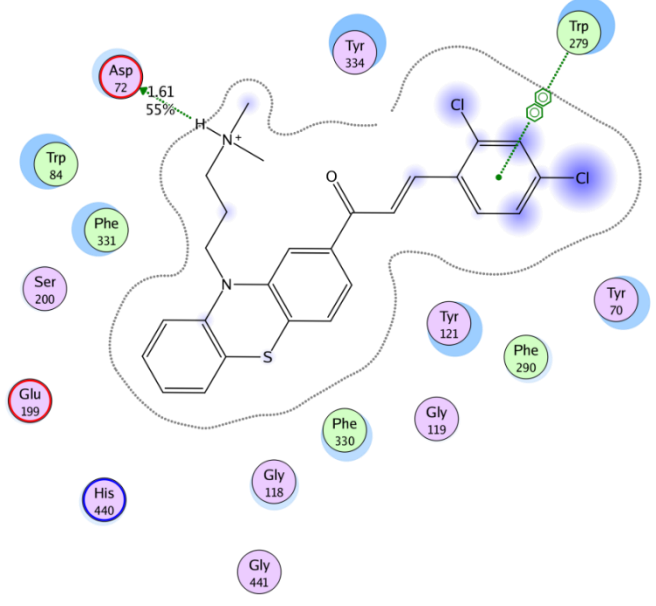 <p>Trp279 (arene-arene), Asp72 (hydrogen bond, score: 55%, length: 1.61 Å )</p>                       |
| AC7 | 4.39 | 4.76 | -17.94 |  <p>Trp279 (arene-arene), Trp84 (arene-arene), Asp72 (hydrogen bond, score: 41%, length: 1.51 Å )</p> |

|     |      |      |        |                                                                                                                                                                                          |
|-----|------|------|--------|------------------------------------------------------------------------------------------------------------------------------------------------------------------------------------------|
| AC8 | 4.80 | 4.82 | -26.27 | 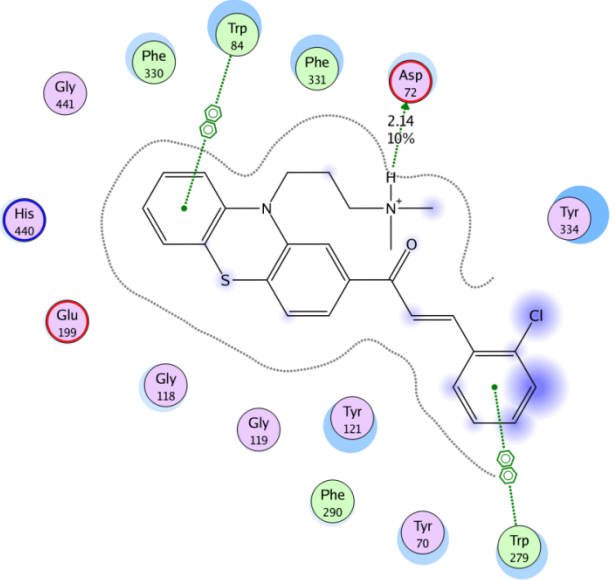 <p>Trp279 (arene-arene), Trp84 (arene-arene), Asp72 (hydrogen bond, score: 10%, length: 2.14 Å )</p> |
| AC9 | 4.60 | 4.76 | -27.80 |  <p>Trp279 (arene-arene), Asp72 (hydrogen bond, score: 12%, length: 2.06 Å )</p>                     |

|      |      |      |        |                                                                                                                                                                     |
|------|------|------|--------|---------------------------------------------------------------------------------------------------------------------------------------------------------------------|
| AC10 | 4.61 | 4.81 | -27.30 | 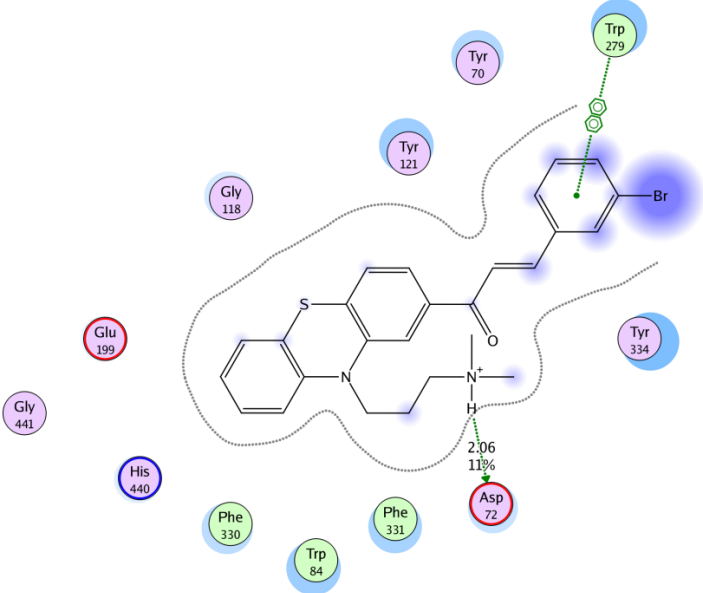 <p>Trp279 (arene-arene), Asp72 (hydrogen bond, score: 11%, length: 2.06 Å )</p> |
| AC11 | 3.73 | 4.59 | -25.33 |  <p>Trp279 (arene-arene), Asp72 (hydrogen bond, score: 7%, length: 2.16 Å )</p> |

|      |      |      |        |                                                                                                                                                                           |
|------|------|------|--------|---------------------------------------------------------------------------------------------------------------------------------------------------------------------------|
| AC12 | 5.96 | 4.81 | -22.15 | 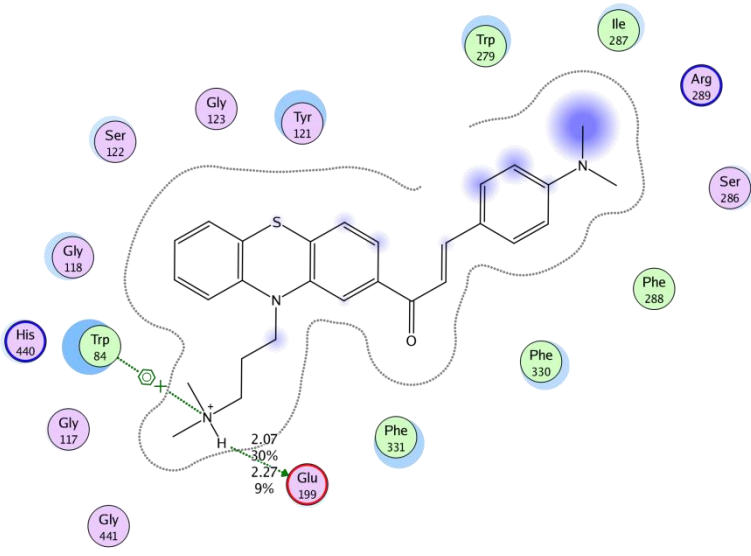 <p>Trp84 (arene-cation), Glu199 (hydrogens, score: 9%; 30%; length: 2.27; 2.07 Å)</p> |
| AC13 | 4.93 | 4.63 | -23.30 |  <p>Asp72 (hydrogen bond, score: 46%, length: 1.71 Å)</p>                             |

Galanthamine

5.9

5.14

-28.53

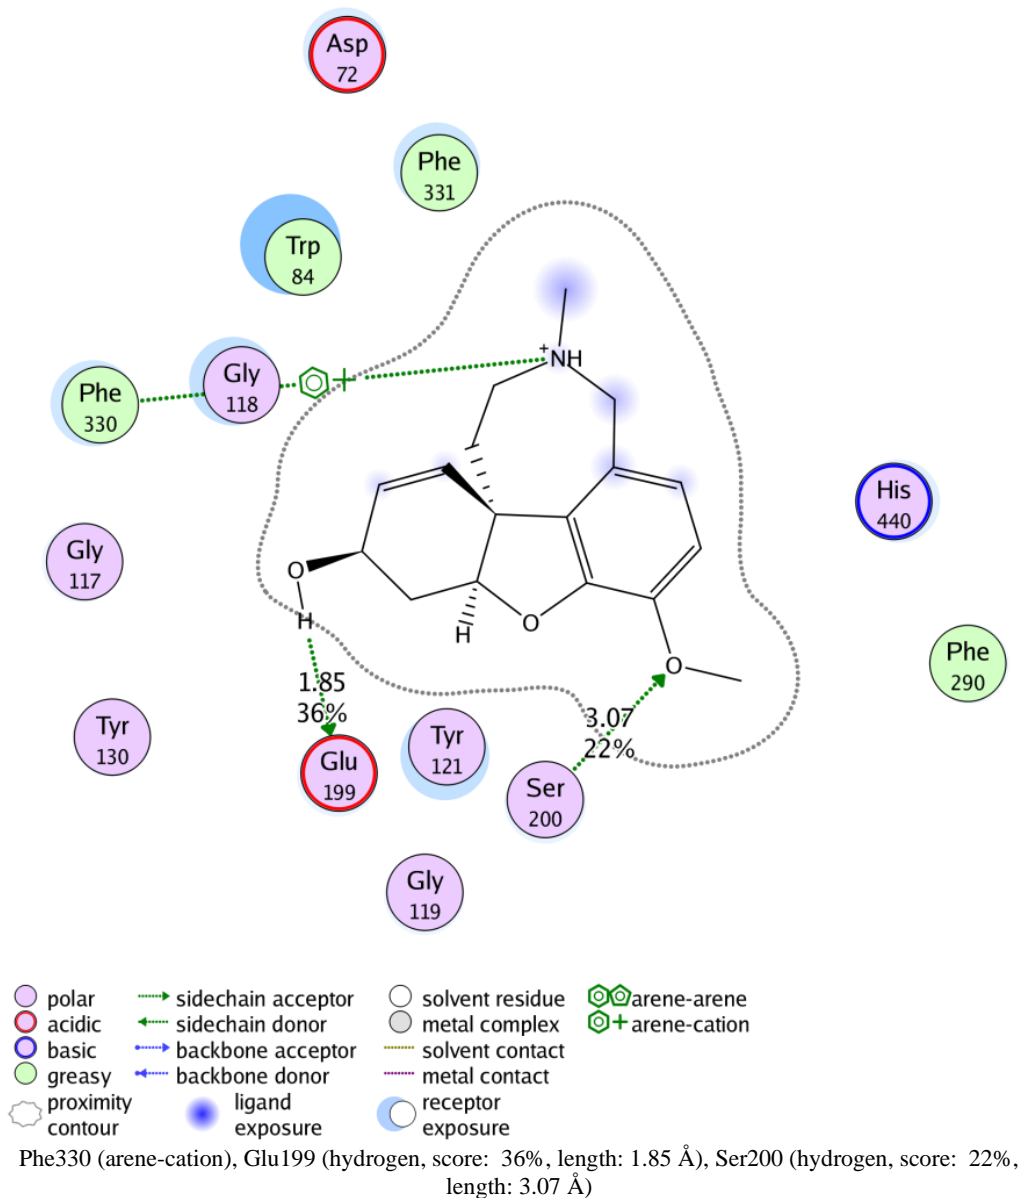

**Table S3.** Docking results and ligand interaction (Co-crystallized 5HU1 chain A and B)

| Compound | pIC <sub>50</sub> |           | Chain | Docking score (kJ.mol <sup>-1</sup> ) | Interactions                                                                                                                                                                                                                                     |
|----------|-------------------|-----------|-------|---------------------------------------|--------------------------------------------------------------------------------------------------------------------------------------------------------------------------------------------------------------------------------------------------|
|          | Observed          | Predicted |       |                                       |                                                                                                                                                                                                                                                  |
| AC1      | 5.20              | 6.52      | A     | -17.82                                | 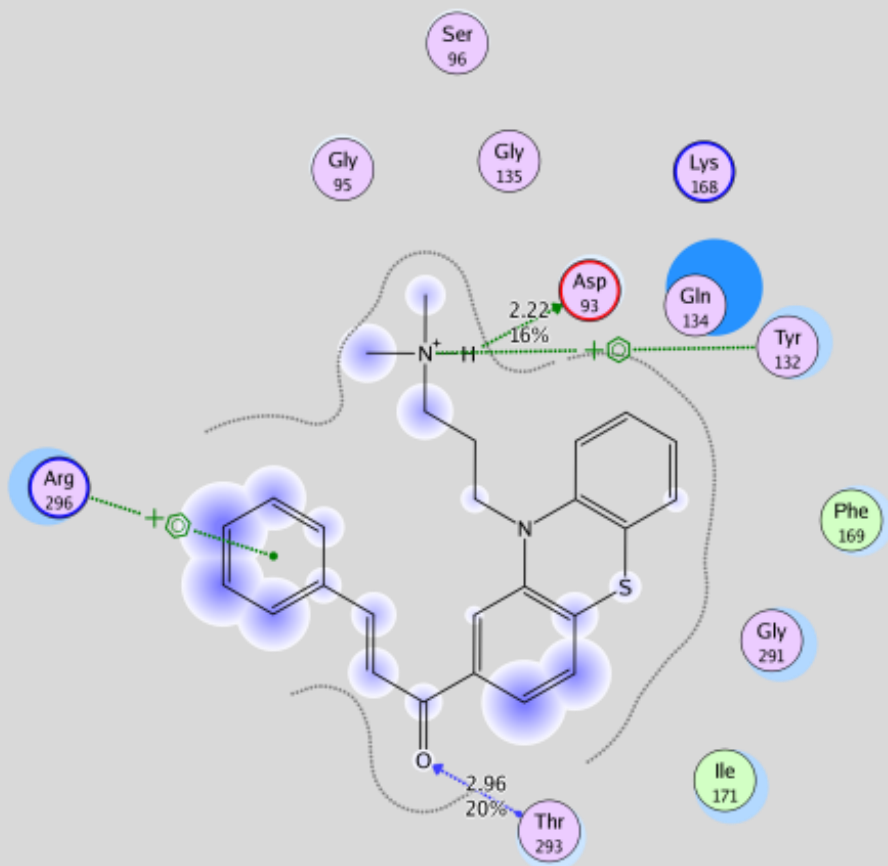 <p>TyrA132 (arene-cation), ArgA296 (arene-cation), AspA93 (hydrogen bond, score: 16%, length 2.22 Å), ThrA293 (hydrogen bond, score: 20%, length 2.96 Å)</p> |

|     |      |      |   |        |                                                                                                                                                                                                                                                                |
|-----|------|------|---|--------|----------------------------------------------------------------------------------------------------------------------------------------------------------------------------------------------------------------------------------------------------------------|
|     |      |      | B | -17.69 | 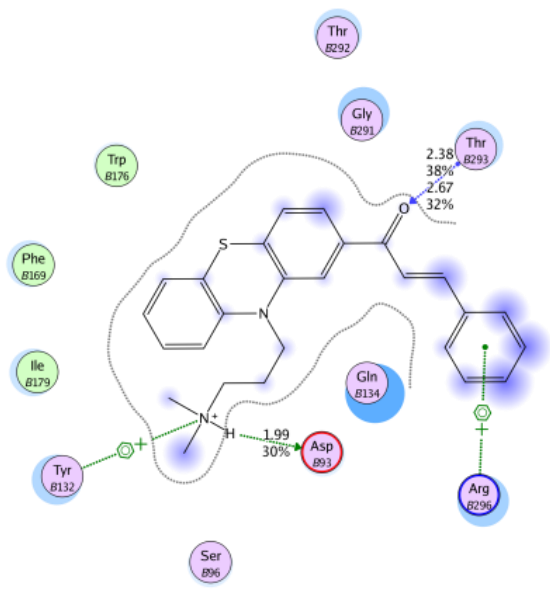 <p>TyrB132 (arene-cation, ArgB296 (arene-cation), AspB93 (hydrogen bond, score: 30%, length 1.99 Å), ThrB293 (hydrogen bonds, score: 32%; 38%, length: 2.67 Å; 2.38 Å)</p> |
| AC2 | 5.52 | 7.38 | A | -17.22 |  <p>AspA93 (hydrogen bond, score: 61%, length 1.53 Å), ThrA293 (hydrogen bond, score: 17%, length 3 Å)</p>                                                                 |

|     |      |      |   |        |                                                                                                                                                                                                   |
|-----|------|------|---|--------|---------------------------------------------------------------------------------------------------------------------------------------------------------------------------------------------------|
|     |      |      | B | -17.81 | 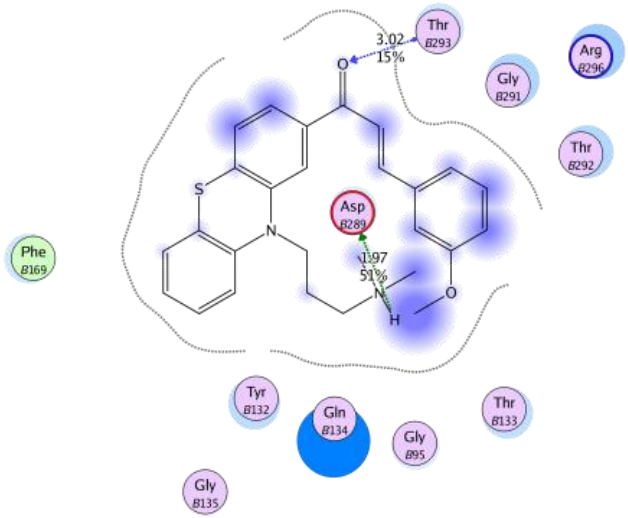 <p>ThrB293 (hydrogen bond, score: 15%, length 3.02 Å), AspB289 (hydrogen bond, score: 51%, length 1.97 Å)</p> |
| AC3 | 5.35 | 7.37 | A | -16.28 |  <p>PheA169 (hydrogen bond, score: 46%, length 1.97 Å)</p>                                                    |



|     |      |      |   |        |                                                                                                                                                                                                    |
|-----|------|------|---|--------|----------------------------------------------------------------------------------------------------------------------------------------------------------------------------------------------------|
|     |      |      | B | -15.37 | 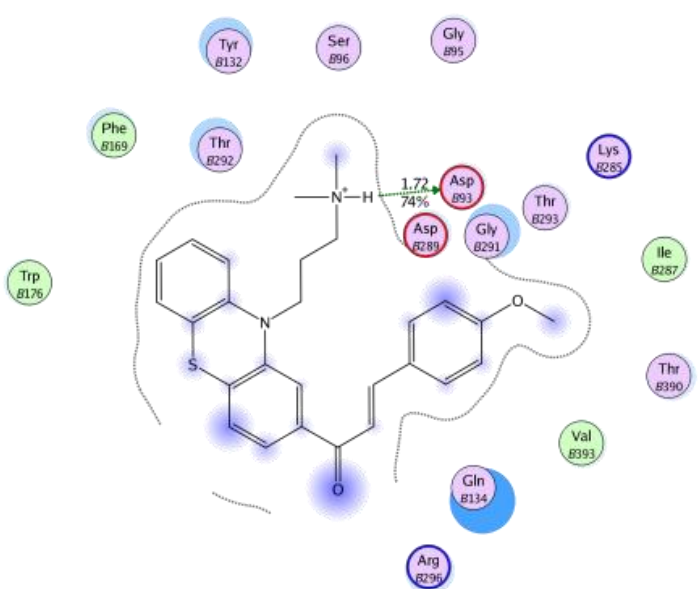 <p>AspB93 (hydrogen bond, score: 74%, length 1.72 Å)</p>                                                       |
| AC4 | 6.81 | 8.49 | A | -16.71 |  <p>ThrA293 (hydrogen bond, score: 26%, length 2.93 Å), PheA169 (hydrogen bond, score: 47%, length 1.98 Å)</p> |

|     |      |      |   |        |                                                                                                                                              |
|-----|------|------|---|--------|----------------------------------------------------------------------------------------------------------------------------------------------|
|     |      |      | B | -13.92 | 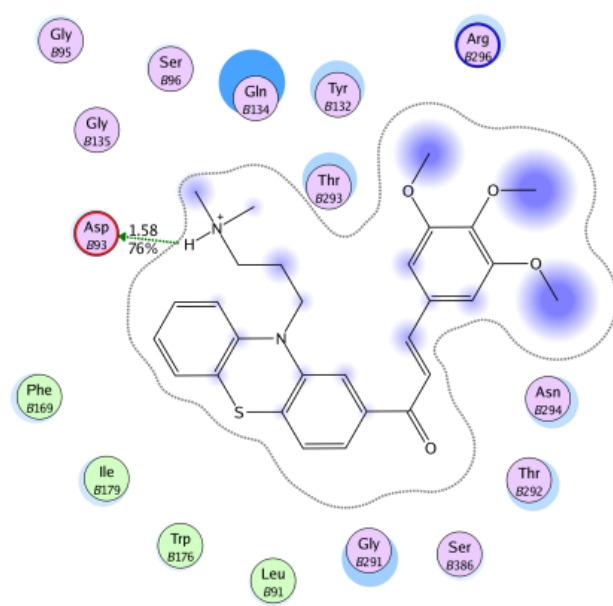 <p>AspB93 (hydrogen bond, score: 76%, length 1.58 Å)</p> |
| AC5 | 5.91 | 7.25 | A | -20.77 |  <p>LysA168 (hydrogen bond, score: 22%, length 2 Å)</p>  |

|     |      |      |   |        |                                                                                                                                     |
|-----|------|------|---|--------|-------------------------------------------------------------------------------------------------------------------------------------|
|     |      |      | B | -16.87 | <p>AspB93 (hydrogen bond, score: 44%, length 1.9 Å), TyrB132 (arene-cation)</p>                                                     |
| AC6 | 6.30 | 7.68 | A | -18.79 | <p>AspA93 (hydrogen bond, score: 43%, length 1.91 Å), ThrA293 (hydrogen bond, score: 34%, length 2.86 Å) ArgA296 (arene-cation)</p> |

|     |      |      |   |        |                                                                                                                                                                                                   |
|-----|------|------|---|--------|---------------------------------------------------------------------------------------------------------------------------------------------------------------------------------------------------|
|     |      |      | B | -16.73 | 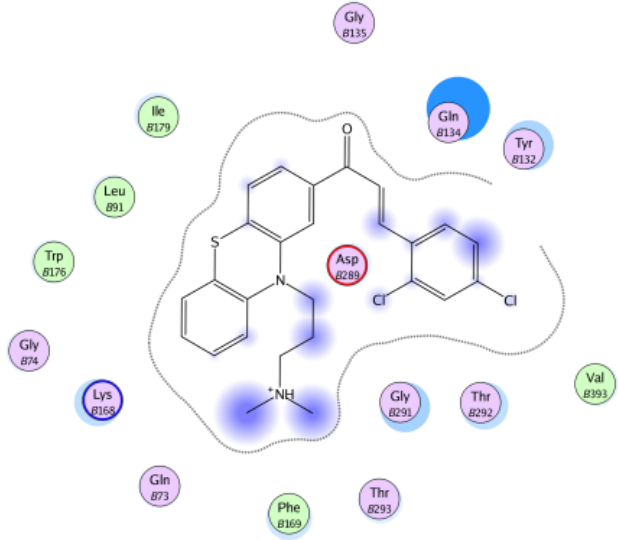 <p>No strong interaction</p>                                                                                  |
| AC7 | 6.35 | 7.63 | A | -19.51 |  <p>AspA93 (hydrogen bond, score: 45%, length 1.93 Å), GlnA134 (hydrogen bond, score: 28%, length 2.77 Å)</p> |

|     |      |      |   |        |                                                                                                                                                                                                                                                                 |
|-----|------|------|---|--------|-----------------------------------------------------------------------------------------------------------------------------------------------------------------------------------------------------------------------------------------------------------------|
|     |      |      | B | -16.85 | 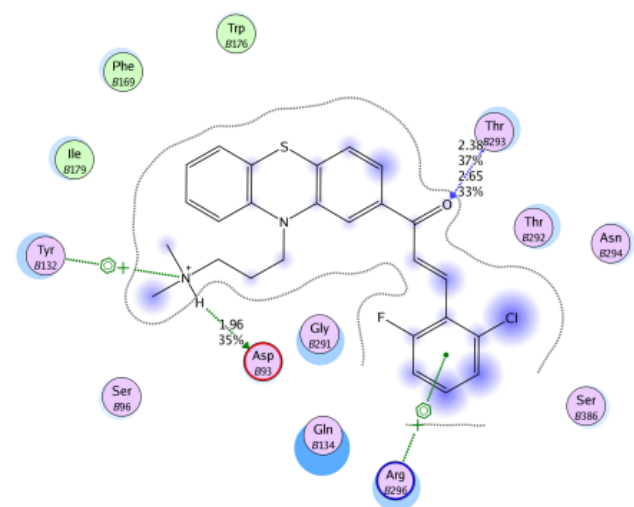 <p>AspB93 (hydrogen bond, score: 35%, length 1.96 Å), ThrB293 (hydrogen bonds, score: 33%; 37%, length: 2.65 Å; 2.38 Å), TyrB132 (arene-cation), ArgB296 (arene-cation)</p> |
| AC8 | 5.53 | 7.15 | A | -20.36 |  <p>AspA93 (hydrogen bond, score: 55%, length 1.89 Å), ThrA293 (hydrogen bond, score: 46%, length 2.58 Å), TyrA132 (arene-cation)</p>                                       |

|     |      |      |   |        |                                                                                                           |
|-----|------|------|---|--------|-----------------------------------------------------------------------------------------------------------|
|     |      |      | B | -16.81 | <p>AspB93 (hydrogen bond, score: 49%, length 1.82 Å), TyrB132 (arene-cation)</p>                          |
| AC9 | 5.43 | 7.12 | A | -20.97 | <p>AspA93 (hydrogen bond, score: 66%, length 1.78 Å), ThrA293 (hydrogen bond, score: 11%, length 3 Å)</p> |

|      |      |      |   |        |                                                                                                                                                                                                                        |
|------|------|------|---|--------|------------------------------------------------------------------------------------------------------------------------------------------------------------------------------------------------------------------------|
|      |      |      | B | -18.06 | 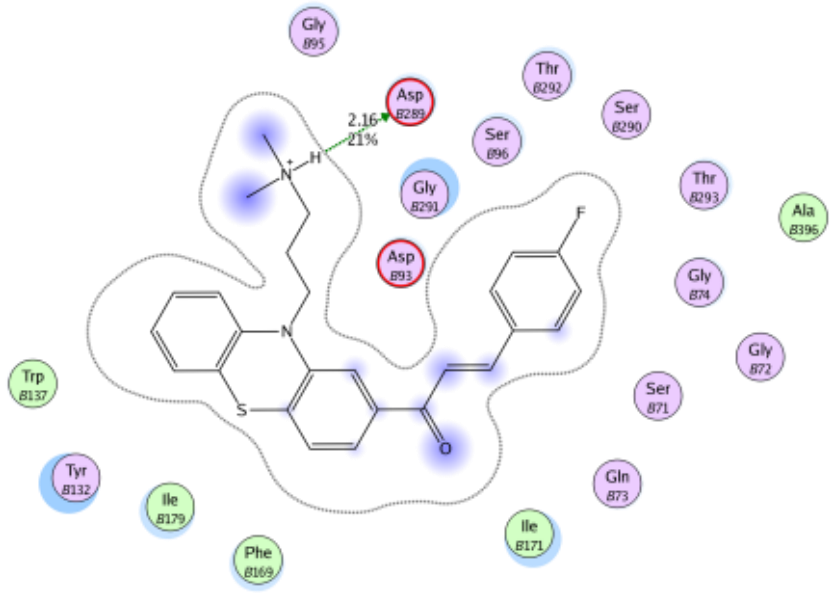 <p>AspB289 (hydrogen bond, score: 21%, length 2.16 Å)</p>                                                                          |
| AC10 | 5.70 | 7.28 | A | -22.51 |  <p>AspA93 (hydrogen bond, score: 37%, length 2 Å), ThrA293 (hydrogen bond, score: 43%, length 2.56 Å), TyrA132 (arene-cation)</p> |

|      |      |      |   |        |                                                                                                                                                                                                                         |
|------|------|------|---|--------|-------------------------------------------------------------------------------------------------------------------------------------------------------------------------------------------------------------------------|
|      |      |      | B | -20.81 | 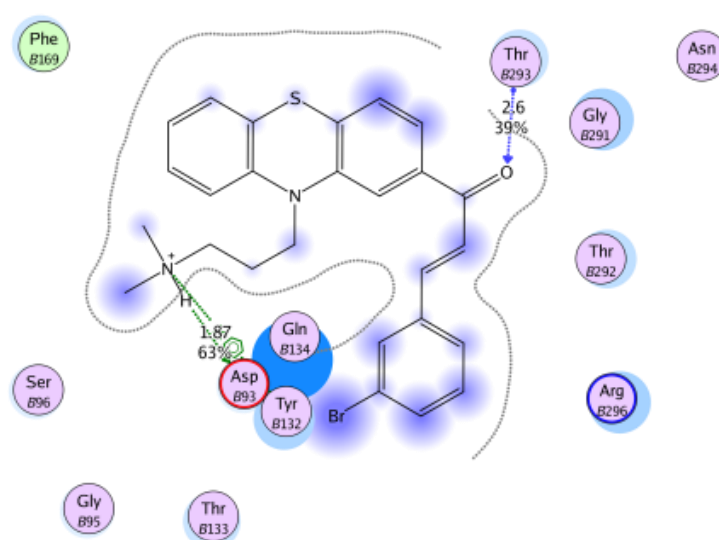 <p>AspB93 (hydrogen bond, score: 63%, length 1.87 Å), ThrB293 (hydrogen bond, score: 39%, length 2.6 Å), TyrB132 (arene-cation)</p> |
| AC11 | 6.40 | 7.99 | A | -19.35 |  <p>AspA93 (hydrogen bond, score: 63%, length 1.82 Å)</p>                                                                           |



|      |      |      |   |        |                                                                                                                                      |
|------|------|------|---|--------|--------------------------------------------------------------------------------------------------------------------------------------|
|      |      |      | B | -16.41 | <p>AspB93 (hydrogen bond, score: 25%, length 2.02 Å), ThrB293 (hydrogen bond, score: 13%, length 2.93 Å), TyrB132 (arene-cation)</p> |
| AC12 | 6.46 | 8.08 | A | -18.25 | <p>AspA93 (hydrogen bond, score: 57%, length 1.85 Å)</p>                                                                             |

|      |      |      |   |        |                                                                                                               |
|------|------|------|---|--------|---------------------------------------------------------------------------------------------------------------|
|      |      |      | B | -16.18 | <p>PheB169 (hydrogen bond, score: 41%, length 2 Å), ThrB293 (hydrogen bond, score: 32%, length 2.9 Å)</p>     |
| AC13 | 5.52 | 7.20 | A | -11.50 | <p>ThrA293 (hydrogen bond, score: 41%, length 2.81 Å), PheA169 (hydrogen bond, score: 29%, length 2.02 Å)</p> |

|              |   |      |   |        |                                                                                                                                                                                                                                                                      |
|--------------|---|------|---|--------|----------------------------------------------------------------------------------------------------------------------------------------------------------------------------------------------------------------------------------------------------------------------|
|              |   |      | B | -14.09 | 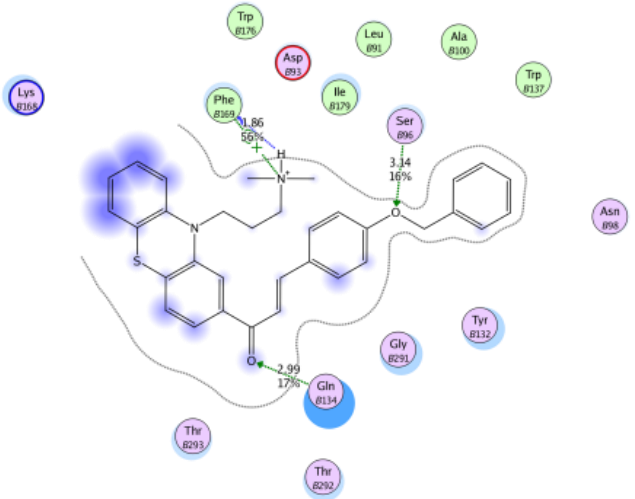 <p>SerB96 (hydrogen bond, score: 16%, length 3.14 Å), PheB169 (hydrogen bond, score: 56%, length 1.86 Å), (arene-cation), GlnB134 (hydrogen bond, score: 17%, length 2.99 Å)</p> |
| Verubecestat | - | 7.66 | A |        |  <p>AspA93 (hydrogen bond, score: 41%, length 2.91Å), AspA289 (hydrogen bonds, score: 50%; 11%, length 2.84 Å, 2.97 Å)</p>                                                       |

|           |      |      |   |        |                                                                                                                                                                                                                                                                                                                                                                                                                                                                                                          |
|-----------|------|------|---|--------|----------------------------------------------------------------------------------------------------------------------------------------------------------------------------------------------------------------------------------------------------------------------------------------------------------------------------------------------------------------------------------------------------------------------------------------------------------------------------------------------------------|
|           |      |      | B |        | <p>       polar → sidechain acceptor    solvent residue    arene-arene<br/>       acidic ← sidechain donor    metal complex    arene-cation<br/>       basic → backbone acceptor    solvent contact    metal contact<br/>       greasy ← backbone donor    ligand exposure    receptor exposure<br/>       proximity contour    ligand exposure    receptor exposure     </p> <p>AspB93 (hydrogen bond, score: 54%, length 2.82 Å), AspB289 (hydrogen bonds, score: 49%; 11%, length 2.85 Å, 2.96 Å)</p> |
| Quercetin | 5.02 | 5.24 | A | -22.23 | <p>GlnA134 (hydrogen bonds, score: 22%, length: 2.68 Å; score: 11%, length 3.03 Å), GlyA291 (hydrogen bond, score: 23%, length: 1.9 Å)</p>                                                                                                                                                                                                                                                                                                                                                               |

|  |  |  |   |        |                                                                                                                                                                             |
|--|--|--|---|--------|-----------------------------------------------------------------------------------------------------------------------------------------------------------------------------|
|  |  |  | B | -23.95 | <p>GlnB134 (hydrogen bonds, score: 12%, length: 2.98 Å; score), GlyB291 (hydrogen bond, score: 31%, length: 1.71 Å), GlnB73 (hydrogen bond, score: 29%, length: 1.62 Å)</p> |
|--|--|--|---|--------|-----------------------------------------------------------------------------------------------------------------------------------------------------------------------------|

**Table S4.** Dataset of 72 compounds used in the building of 2D-QSAR model for AChE inhibitors

| <b>No.</b> | <b>Name</b>   | <b>pIC50</b> | <b>predicted pIC50</b> |
|------------|---------------|--------------|------------------------|
| 1          | CHEMBL3133246 | 5.45         | 5.21                   |
| 2          | CHEMBL2296124 | 4.33         | 4.26                   |
| 3          | CHEMBL237223  | 4.59         | 4.72                   |
| 4          | CHEMBL2334727 | 4.72         | 4.60                   |
| 5          | CHEMBL3617370 | 4.51         | 4.42                   |
| 6          | CHEMBL3617380 | 4.49         | 4.46                   |
| 7          | CHEMBL2334728 | 4.24         | 4.28                   |
| 8          | CHEMBL416526  | 4.94         | 4.73                   |
| 9          | CHEMBL2393074 | 4.75         | 4.90                   |
| 10         | CHEMBL2385772 | 4.48         | 4.73                   |
| 11         | CHEMBL253386  | 5.49         | 5.22                   |
| 12         | CHEMBL3617382 | 4.63         | 4.52                   |
| 13         | CHEMBL3125443 | 4.90         | 4.67                   |
| 14         | CHEMBL3617375 | 4.28         | 4.49                   |
| 15         | CHEMBL3127216 | 4.84         | 4.70                   |
| 16         | CHEMBL3617367 | 4.38         | 4.27                   |
| 17         | CHEMBL457684  | 4.78         | 4.48                   |
| 18         | CHEMBL340807  | 4.80         | 4.66                   |
| 19         | CHEMBL2334726 | 4.49         | 4.55                   |
| 20         | CHEMBL659     | 5.62         | 5.42                   |
| 21         | CHEMBL2334730 | 4.64         | 4.78                   |
| 22         | CHEMBL3133247 | 4.81         | 5.07                   |
| 23         | CHEMBL517342  | 4.19         | 4.38                   |
| 24         | CHEMBL2296125 | 4.46         | 4.37                   |
| 25         | CHEMBL3617393 | 4.47         | 4.24                   |
| 26         | CHEMBL3617388 | 4.45         | 4.47                   |
| 27         | CHEMBL2385773 | 4.83         | 4.61                   |
| 28         | CHEMBL2385777 | 4.34         | 4.58                   |
| 29         | CHEMBL3127219 | 4.92         | 4.75                   |
| 30         | CHEMBL3127043 | 4.98         | 4.97                   |
| 31         | CHEMBL1269160 | 4.57         | 4.42                   |
| 32         | CHEMBL2334725 | 4.70         | 4.76                   |
| 33         | CHEMBL1270150 | 4.73         | 4.81                   |
| 34         | CHEMBL500712  | 4.40         | 4.21                   |
| 35         | CHEMBL2334736 | 4.72         | 4.83                   |
| 36         | CHEMBL2018160 | 4.63         | 4.48                   |
| 37         | CHEMBL2334737 | 4.71         | 4.61                   |
| 38         | CHEMBL269538  | 4.19         | 4.49                   |
| 39         | CHEMBL3617397 | 4.52         | 4.32                   |
| 40         | CHEMBL2334745 | 4.49         | 4.70                   |
| 41         | CHEMBL2296112 | 4.25         | 4.44                   |

|    |               |      |      |
|----|---------------|------|------|
| 42 | CHEMBL3617381 | 4.49 | 4.53 |
| 43 | CHEMBL3133250 | 4.29 | 4.63 |
| 44 | CHEMBL12014   | 4.23 | 4.50 |
| 45 | CHEMBL3617372 | 4.26 | 4.44 |
| 46 | CHEMBL3133243 | 4.97 | 5.10 |
| 47 | CHEMBL510090  | 4.72 | 4.82 |
| 48 | CHEMBL2385771 | 4.30 | 4.56 |
| 49 | CHEMBL2296117 | 4.18 | 4.13 |
| 50 | CHEMBL3127217 | 4.99 | 4.86 |
| 51 | CHEMBL2334738 | 4.69 | 4.66 |
| 52 | CHEMBL2296113 | 4.21 | 4.40 |
| 53 | CHEMBL2381433 | 4.58 | 4.53 |
| 54 | CHEMBL3132866 | 4.98 | 5.01 |
| 55 | CHEMBL2385768 | 4.75 | 4.66 |
| 56 | CHEMBL2385780 | 4.88 | 4.68 |
| 57 | CHEMBL2334739 | 4.52 | 4.35 |
| 58 | CHEMBL3133245 | 5.36 | 5.17 |
| 59 | CHEMBL1270255 | 5.01 | 5.24 |
| 60 | CHEMBL3133248 | 4.66 | 4.90 |
| 61 | CHEMBL3617362 | 4.22 | 4.42 |
| 62 | CHEMBL2381434 | 4.67 | 4.49 |
| 63 | CHEMBL1535235 | 4.61 | 4.53 |
| 64 | CHEMBL129177  | 4.47 | 4.70 |
| 65 | CHEMBL2385784 | 4.53 | 4.76 |
| 66 | CHEMBL2385779 | 4.42 | 4.23 |
| 67 | CHEMBL3617396 | 4.39 | 4.26 |
| 68 | CHEMBL1085869 | 5.67 | 5.51 |
| 69 | CHEMBL2334747 | 4.51 | 4.56 |
| 70 | CHEMBL2385766 | 4.35 | 4.57 |
| 71 | CHEMBL463856  | 4.33 | 4.26 |
| 72 | CHEMBL2334732 | 4.86 | 4.81 |

**Table S5.** Dataset of 215 compounds used in the building of 2D-QSAR model for BACE-1 inhibitors

| No. | Name              | pIC50 | Predicted pIC50 |
|-----|-------------------|-------|-----------------|
| 1   | BMC-2009-3671-17  | 6.92  | 7.02            |
| 2   | BMC-2004-247-8    | 6.46  | 6.57            |
| 3   | BMC-2007-1023-8   | 8.30  | 7.97            |
| 4   | JMC-2012-27-30    | 5.49  | 5.65            |
| 5   | BMC-2004-248-21   | 7.17  | 6.96            |
| 6   | BMC-2009-3675-11  | 7.96  | 8.19            |
| 7   | BMC-2009-3671-20  | 6.82  | 7.33            |
| 8   | BMC-2009-3677-26  | 7.49  | 7.93            |
| 9   | BMC-2008-1019-14  | 6.26  | 6.86            |
| 10  | BMC-2014-2038-39  | 7.74  | 7.51            |
| 11  | BMC-2013-4677-30  | 6.83  | 6.54            |
| 12  | BMC-2004-248-19   | 7.37  | 6.74            |
| 13  | BMC-2013-4677-37  | 5.88  | 6.33            |
| 14  | BMC-2013-4241-10  | 6.46  | 6.45            |
| 15  | BMC-2014-2036-24  | 7.49  | 8.02            |
| 16  | BMC-2013-4675-7   | 7.35  | 6.70            |
| 17  | BMC-2009-3667-16  | 7.72  | 7.63            |
| 18  | BMC-2014-2039-43  | 7.28  | 7.39            |
| 19  | EODD-2013-723-102 | 6.62  | 6.99            |
| 20  | JMC-2012-26-15    | 5.00  | 5.15            |
| 21  | JMC-2012-27-37    | 5.70  | 5.84            |
| 22  | EODD-2013-718-42c | 8.00  | 8.56            |
| 23  | JMC-2012-9013-24  | 7.11  | 7.90            |
| 24  | BMC-2014-2041-65  | 6.24  | 6.08            |
| 25  | BMC-2008-1021-30  | 6.48  | 7.12            |
| 26  | BMC-2009-3672-21  | 8.10  | 7.85            |
| 27  | JMC-2012-9013-26  | 7.58  | 7.52            |
| 28  | EODD-2013-720-53  | 6.82  | 7.20            |
| 29  | BMC-2008-1021-31  | 6.64  | 6.66            |
| 30  | BMC-2008-1021-28  | 7.08  | 6.58            |
| 31  | JMC-2012-27-41    | 6.20  | 6.58            |
| 32  | BMC-2009-3675-7   | 8.40  | 8.17            |
| 33  | BMC-2009-3673-39  | 7.70  | 7.35            |
| 34  | BMC-2014-2042-71  | 6.62  | 6.31            |
| 35  | EODD-2013-713-11  | 7.55  | 7.25            |
| 36  | BMC-2009-3672-27  | 7.04  | 7.46            |
| 37  | BMC-2014-2042-90  | 8.07  | 7.85            |
| 38  | EODD-2013-719-48  | 8.48  | 8.21            |
| 39  | JMC-2012-27-47    | 6.49  | 6.45            |
| 40  | BMC_2014-2042-81  | 7.60  | 8.12            |
| 41  | BMC-2009-3665-4   | 8.04  | 7.43            |
| 42  | BMC-2009-3673-36  | 7.64  | 7.69            |



|    |                   |      |      |
|----|-------------------|------|------|
| 43 | BMC-2013-4676-17  | 6.93 | 7.33 |
| 44 | BMC-2014-2038-41  | 7.70 | 7.60 |
| 45 | BMC-2013-4677-38  | 6.07 | 6.44 |
| 46 | BMC-2009-3667-20  | 7.47 | 7.71 |
| 47 | EODD-2013-720-58  | 7.70 | 7.39 |
| 48 | JMC-2012-26-24b   | 6.20 | 5.74 |
| 49 | BMC-2014-2036-23  | 7.70 | 7.56 |
| 50 | BMC-2013-4677-53  | 7.05 | 7.14 |
| 51 | BMC-2007-1023-2   | 6.60 | 7.23 |
| 52 | BMC-2009-3667-17  | 7.64 | 7.27 |
| 53 | BMC-2008-1020-23  | 6.22 | 6.37 |
| 54 | BMC-2014-2041-66  | 6.15 | 6.14 |
| 55 | BMC-2013-4241-4   | 5.99 | 6.39 |
| 56 | BMC-2009-3673-34  | 7.85 | 7.19 |
| 57 | BMC-2014-2036-17  | 7.32 | 7.35 |
| 58 | BMC-2008-1020-18  | 6.12 | 5.95 |
| 59 | BMC-2014-2038-37  | 4.66 | 5.00 |
| 60 | BMC-2009-3672-24  | 8.30 | 7.96 |
| 61 | BMC-2007-1024-18  | 7.40 | 7.93 |
| 62 | BMC-2008-1020-24  | 6.80 | 6.66 |
| 63 | JMC-2012-28-64    | 6.10 | 6.08 |
| 64 | BMC-2014-2035-13  | 8.00 | 7.51 |
| 65 | BMC-2014-2040-53  | 8.15 | 8.02 |
| 66 | BMC-2009-3667-18a | 7.58 | 7.41 |
| 67 | BMC-2009-3666-10  | 7.64 | 8.03 |
| 68 | JMC-2012-9010-17  | 8.10 | 7.96 |
| 69 | BMC-2014-2036-20  | 7.11 | 7.79 |
| 70 | EODD-2013-721-64  | 6.33 | 6.65 |
| 71 | BMC-2013-4677-35  | 6.38 | 6.60 |
| 72 | BMC-2009-3671-12  | 7.04 | 7.62 |
| 73 | EODD-2013-718-44  | 8.70 | 8.08 |
| 74 | EODD-2013-721-65  | 7.20 | 6.65 |
| 75 | BMC-2013-4242-23  | 7.34 | 7.00 |
| 76 | BMC-2013-4241-9   | 7.92 | 7.22 |
| 77 | BMC-2014-2040-62  | 7.69 | 7.61 |
| 78 | BMC-2007-1023-5   | 7.30 | 7.87 |
| 79 | BMC-2004-247-9    | 6.26 | 6.30 |
| 80 | EODD-2013-718-42b | 8.04 | 8.33 |
| 81 | BMC-2009-3676-18  | 8.10 | 7.76 |
| 82 | BMC-2007-1023-6   | 8.22 | 8.01 |
| 83 | BMC-2009-3668-25  | 8.22 | 7.78 |
| 84 | EODD-2013-718-45  | 7.68 | 7.34 |
| 85 | BMC-2004-246-4    | 6.72 | 6.46 |
| 86 | BMC-2013-4241-14  | 7.51 | 7.15 |
| 87 | BMC-2009-3667-19  | 7.55 | 7.59 |

|     |                   |      |      |
|-----|-------------------|------|------|
| 88  | BMC-2007-1025-22  | 8.22 | 7.68 |
| 89  | EODD-2013-716-31  | 8.70 | 8.27 |
| 90  | BMC-2014-2042-85  | 6.53 | 7.06 |
| 91  | BMC-2007-1023-11  | 8.30 | 8.05 |
| 92  | BMC-2009-3671-16  | 7.58 | 8.09 |
| 93  | BMC-2014-2039-42  | 7.08 | 7.22 |
| 94  | BMC-2009-3666-11  | 7.74 | 8.32 |
| 95  | BMC-2014-2038-40  | 7.70 | 7.27 |
| 96  | BMC-2004-248-13   | 6.68 | 7.04 |
| 97  | BMC-2014-2039-47  | 7.57 | 7.82 |
| 98  | BMC-2009-3672-25  | 7.22 | 7.43 |
| 99  | BMC-2009-3677-23  | 7.30 | 7.25 |
| 100 | BMC-2009-3666-7   | 7.20 | 7.33 |
| 101 | JMC-2012-28-83    | 5.10 | 5.52 |
| 102 | BMC-2014-2035-14  | 7.70 | 8.20 |
| 103 | BMC-2007-1023-10  | 8.30 | 8.19 |
| 104 | BMC-2014-2035-15  | 8.00 | 8.16 |
| 105 | BMC-2014-2036-22  | 7.04 | 6.54 |
| 106 | EODD-2013-718-42a | 7.89 | 8.20 |
| 107 | BMC-2014-2042-72  | 7.58 | 7.34 |
| 108 | BMC-2013-4242-24  | 6.43 | 6.98 |
| 109 | BMC-2009-3672-26  | 8.04 | 7.58 |
| 110 | BMC-2009-3676-21  | 6.60 | 6.71 |
| 111 | BMC-2009-3677-24  | 7.40 | 7.21 |
| 112 | BMC-2013-4242-20  | 6.92 | 6.62 |
| 113 | BMC-2009-3675-9   | 8.00 | 7.47 |
| 114 | BMC-2013-4241-5   | 6.26 | 6.22 |
| 115 | JMC-2012-26-19b   | 5.20 | 5.44 |
| 116 | BMC-2014-2042-87  | 7.31 | 7.24 |
| 117 | BMC-2014-2042-84  | 6.49 | 7.03 |
| 118 | BMC-2013-4676-19  | 7.38 | 7.76 |
| 119 | BMC-2013-4241-3   | 5.05 | 5.61 |
| 120 | BMC-2009-3668-27  | 7.40 | 7.26 |
| 121 | BMC-2009-3677-25  | 7.70 | 7.26 |
| 122 | BMC-2009-3675-10  | 7.66 | 7.50 |
| 123 | BMC-2007-1025-21  | 8.40 | 7.77 |
| 124 | BMC-2007-1024-17  | 8.30 | 8.17 |
| 125 | BMC-2004-246-5    | 6.89 | 6.25 |
| 126 | BMC-2009-3676-19  | 7.06 | 7.16 |
| 127 | BMC-2013-4675-4   | 6.24 | 6.39 |
| 128 | BMC-2014-2041-64  | 6.92 | 6.23 |
| 129 | BMC-2004-246-6    | 5.95 | 6.41 |
| 130 | BMC-2013-4242-22  | 7.64 | 7.14 |
| 131 | BMC-2007-1024-15  | 7.92 | 7.44 |
| 132 | BMC-2013-4241-12  | 6.86 | 6.99 |

|     |                   |      |      |
|-----|-------------------|------|------|
| 133 | BMC-2009-3673-35  | 8.30 | 7.86 |
| 134 | BMC-2008-1019-13  | 6.52 | 6.58 |
| 135 | BMC-2013-4241-16  | 6.12 | 6.63 |
| 136 | BMC-2014-2042-73  | 7.52 | 7.45 |
| 137 | JMC-2012-27-34    | 5.70 | 5.91 |
| 138 | BMC-2013-4677-36  | 6.65 | 6.43 |
| 139 | BMC-2004-248-20   | 6.75 | 6.64 |
| 140 | BMC-2009-3672-23  | 7.64 | 7.81 |
| 141 | JMC-2012-9010-18  | 7.64 | 7.67 |
| 142 | BMC-2009-3675-13  | 7.64 | 7.55 |
| 143 | JMC-2012-28-65    | 6.30 | 6.03 |
| 144 | BMC-2013-4241-15  | 7.35 | 7.51 |
| 145 | BMC-2004-246-7    | 5.76 | 6.23 |
| 146 | BMC-2013-4677-48  | 8.04 | 7.86 |
| 147 | BMC-2013-4241-13  | 7.41 | 7.34 |
| 148 | BMC-2013-4675-6   | 6.42 | 6.42 |
| 149 | BMC-2009-3671-9   | 8.70 | 8.29 |
| 150 | BMC-2009-3671-11  | 7.72 | 8.26 |
| 151 | BMC-2008-1019-12  | 7.48 | 6.96 |
| 152 | BMC-2008-1021-27  | 7.70 | 7.30 |
| 153 | BMC-2014-2039-46  | 7.27 | 7.16 |
| 154 | BMC-2014-2035-9   | 7.10 | 6.33 |
| 155 | JMC-2012-9010-15  | 7.74 | 7.98 |
| 156 | BMC-2007-1024-13  | 7.47 | 7.41 |
| 157 | BMC-2014-2042-79  | 7.40 | 7.59 |
| 158 | EODD-2013-716-32  | 8.40 | 8.23 |
| 159 | BMC-2008-1021-29  | 7.00 | 7.42 |
| 160 | JMC-2012-9013-25  | 7.48 | 7.95 |
| 161 | BMC-2004-246-3    | 7.09 | 7.26 |
| 162 | BMC-2014-2042-80  | 7.47 | 7.90 |
| 163 | BMC-2004-247-10   | 6.46 | 6.20 |
| 164 | JMC-2012-9013-23  | 7.54 | 8.48 |
| 165 | BMC-2008-1020-26  | 7.85 | 7.24 |
| 166 | BMC-2009-3667-18b | 7.40 | 7.51 |
| 167 | EODD-2013-713-12a | 8.41 | 8.84 |
| 168 | BMC-2009-3677-27  | 7.10 | 7.58 |
| 169 | BMC-2004-248-14   | 6.68 | 6.49 |
| 170 | BMC-2007-1024-12  | 6.92 | 6.75 |
| 171 | EODD-2013-718-41  | 7.30 | 7.95 |
| 172 | BMC-2009-3675-14  | 7.32 | 7.60 |
| 173 | BMC-2008-1019-8   | 5.61 | 6.20 |
| 174 | BMC-2008-1020-22  | 5.77 | 6.13 |
| 175 | BMC-2008-1019-6   | 6.74 | 6.26 |
| 176 | BMC-2009-3671-15  | 8.15 | 8.22 |
| 177 | BMC-2013-4242-19  | 7.21 | 6.91 |

|     |                   |      |      |
|-----|-------------------|------|------|
| 178 | BMC-2014-2042-82  | 7.55 | 7.36 |
| 179 | EODD-2013-721-61  | 6.96 | 7.39 |
| 180 | BMC-2008-1020-16  | 7.40 | 7.28 |
| 181 | BMC-2014-2042-76  | 8.70 | 8.94 |
| 182 | BMC-2009-3675-5   | 8.30 | 7.93 |
| 183 | BMC-2009-3675-16  | 7.70 | 7.51 |
| 184 | BMC-2007-1023-9   | 7.96 | 8.00 |
| 185 | BMC-2014-2042-78  | 7.70 | 7.43 |
| 186 | BMC-2008-1019-7   | 5.95 | 6.35 |
| 187 | BMC-2013-4675-3   | 6.27 | 6.20 |
| 188 | JMC-2012-26-8b    | 4.60 | 4.57 |
| 189 | EODD-2013-713-10  | 7.06 | 7.07 |
| 190 | JMC-2012-26-19a   | 5.00 | 5.44 |
| 191 | BMC-2014-2035-12  | 5.47 | 5.08 |
| 192 | BMC-2013-4676-18  | 6.90 | 7.35 |
| 193 | JMC-2012-9013-19  | 8.27 | 8.63 |
| 194 | BMC-2004-248-17   | 7.22 | 6.58 |
| 195 | BMC-2014-2040-54  | 8.22 | 8.06 |
| 196 | BMC-2009-3671-13  | 7.82 | 7.98 |
| 197 | JMC-2012-26-24a   | 6.00 | 6.04 |
| 198 | BMC-2008-1020-19  | 7.77 | 7.61 |
| 199 | EODD-2013-719-50  | 7.77 | 8.60 |
| 200 | JMC-2012-27-54a   | 5.40 | 5.90 |
| 201 | EODD-2013-717-39a | 9.40 | 9.53 |
| 202 | BMC-2007-1024-14  | 7.74 | 8.09 |
| 203 | BMC-2013-4677-31  | 6.73 | 6.68 |
| 204 | BMC-2009-3672-22  | 8.70 | 8.02 |
| 205 | BMC-2009-3667-23  | 6.38 | 6.32 |
| 206 | BMC-2013-4675-5   | 7.03 | 6.31 |
| 207 | BMC-2013-4677-32  | 7.22 | 7.24 |
| 208 | BMC-2014-2042-88  | 7.44 | 7.03 |
| 209 | BMC-2007-1023-7   | 8.52 | 7.97 |
| 210 | JMC-2012-26-8a    | 4.79 | 4.94 |
| 211 | JMC-2012-9013-22  | 7.69 | 8.31 |
| 212 | BMC-2013-4241-18  | 7.02 | 6.58 |
| 213 | BMC-2014-2042-75  | 8.00 | 8.54 |
| 214 | JMC-2012-9010-16  | 7.45 | 8.05 |
| 215 | BMC-2007-1024-16  | 8.10 | 7.53 |

**Table S6. Equations for calculation of 2D-QSAR validation metrics**

These metrics were calculated according to the equations (Eq.) (1-10).

$$\text{RMSE} = \sqrt{\frac{\sum_{i=1}^{n_{TR}} (\hat{y}_i - y_i)^2}{n}} \quad (1)$$

$$R^2 = 1 - \frac{\sum_{i=1}^{n_{TR}} (\hat{y}_i - y_i)^2}{\sum_{i=1}^{n_{TR}} (y_i - \bar{y})^2} \quad (2)$$

$$\text{RMSE}_{\text{LOO}} = \sqrt{\frac{\sum_{i=1}^{n_{TR}} (\hat{y}'_i - y_i)^2}{n}} \quad (3)$$

$$R^2_{\text{LOO}} = 1 - \frac{\sum_{i=1}^{n_{TR}} (\hat{y}'_i - y_i)^2}{\sum_{i=1}^{n_{TR}} (y_i - \bar{y})^2} \quad (4)$$

$$R^2_{\text{PRED}} = 1 - \frac{\sum_{l=1}^{n_{VAL}} (y_{\text{pred}(\text{validation})} - y_{\text{validation}})^2}{\sum_{l=1}^{n_{VAL}} (y_{\text{validation}} - \bar{y}_{\text{training}})^2} \quad (5)$$

$$r_m^2 = r^2 (1 - \sqrt{r^2 - r_0^2}) \quad (6)$$

$$r'^2_m = r'^2 (1 - \sqrt{r'^2 - r'^2_0}) \quad (7)$$

$$\overline{r_m^2} = \frac{r_m^2 + r'^2_m}{2} \quad (8)$$

$$\Delta r_m^2 = |r_m^2 - r'^2_m| \quad (9)$$

$$\text{CCC} = \frac{2 \sum_{i=1}^{n_{VAL}} (y_i - \bar{y})(\hat{y}_i - \bar{\hat{y}})}{\sum_{i=1}^{n_{VAL}} (y_i - \bar{y})^2 + \sum_{i=1}^{n_{VAL}} (\hat{y}_i - \bar{\hat{y}})^2 + n_{VAL} (\bar{y} - \bar{\hat{y}})^2} \quad (10)$$

In Eq. (1), (2), and (10),  $y_i$  and  $\hat{y}_i$  are, respectively, the observed and predicted activity values, while  $\bar{y}$  and  $\bar{\hat{y}}$  are, respectively, the mean values of  $y_i$  and  $\hat{y}_i$ . In Eq.(3) and (4),  $y_i$  and  $\hat{y}'_i$  are, respectively, the observed and predicted activity values in LOO cross-validation. Eq. (6) and (7) were utilized to calculate correlation coefficients between observed and predicted activity values of the compounds of training set with ( $r^2$ ) or without intercept ( $r_0^2$ ) in case of using predicted data on the y-axis and experimental data on the x-axis, while ( $r'^2$ ) and ( $r'^2_0$ ) are, respectively, the same coefficients in the opposite case. The most stringent validation criteria thresholds including  $r_m^2 \geq 0.65$ ;  $\text{CCC} \geq 0.85$ ;  $\overline{r_m^2} \geq 0.5$ ; and  $\Delta r_m^2 \leq 0.2$  were applied to verify the external predictivity of good models [1,2]

**Table S7.** Selected descriptors used for building 2D-QSAR models

| Code                                                    | Category                      | Description                                                                                                                                                                                                                                                                                                |
|---------------------------------------------------------|-------------------------------|------------------------------------------------------------------------------------------------------------------------------------------------------------------------------------------------------------------------------------------------------------------------------------------------------------|
| BCUT_SlogP_3                                            | Adjacency and distance matrix | A Burden's parameter using atomic contribution to logP (using the Wildman and Crippen SlogP method [3]) instead of partial charge.                                                                                                                                                                         |
| BCUT_PEOE_1                                             | Adjacency and distance matrix | A descriptor relating topological shape and partial charges                                                                                                                                                                                                                                                |
| petitjean                                               | Adjacency and distance matrix | Value of (diameter - radius) / diameter.                                                                                                                                                                                                                                                                   |
| reactive                                                | Physical property             | An indicator of the presence of reactive groups. A non-zero value indicates that the molecule contains a reactive group. The table of reactive groups is based on the Oprea set [4] and includes metals, phospho-, N/O/S-N/O/S single bonds, thiols, acyl halides, Michael Acceptors, azides, esters, etc. |
| logS                                                    | Physical property             | The log of the aqueous solubility (mol/L).                                                                                                                                                                                                                                                                 |
| PEOE_VSA-0,<br>PEOE_VSA+1,<br>PEOE_VSA-3,<br>PEOE_VSA-6 | Partial charge                | Sum of the proximate accessible <i>van der Waals</i> surface area ( $\text{\AA}^2$ ), $v_i$ , calculation for each atom over all the atoms $i$ , such that partial charge of atom $i$ is in a specified range.                                                                                             |
| SlogP_VSA2,<br>SlogP_VSA3,<br>SlogP_VSA5                | Subdivided surface areas      | Sum of the proximate accessible <i>van der Waals</i> surface area ( $\text{\AA}^2$ ), $v_i$ , calculated for each atom over all the atoms, such that partition coefficient for atom $i$ is in a specified range                                                                                            |
| SMR_VSA2                                                | Subdivided surface areas      | Sum of the proximate accessible <i>van der Waals</i> surface area ( $\text{\AA}^2$ ), $v_i$ , calculation for each atom over all the atoms $i$ , such that molar refractivity for atom $i$ is in a specified range.                                                                                        |
| a_ICM                                                   | Atom counts and bond counts   | The entropy of the element distribution in the molecule (including implicit hydrogens but not lone pair pseudo-atoms)                                                                                                                                                                                      |
| chiral_u                                                | Atom counts and bond counts   | The number of unconstrained chiral centers.                                                                                                                                                                                                                                                                |
| rings                                                   | Atom counts and bond counts   | The number of rings                                                                                                                                                                                                                                                                                        |
| a_Nn                                                    | Atom counts and bond counts   | The number of nitrogen atoms.                                                                                                                                                                                                                                                                              |

**Table S8.** Values of selected descriptors used in prediction of pIC<sub>50</sub> of the synthesized chalcone derivatives (AChE)

| Compound    | BCUT_SLOGP_3 | reactive | PEOE_VSA+1 | PEOE_VSA-3 | SlogP_VSA2 | SMR_VSA2 | Predicted pIC <sub>50</sub> |
|-------------|--------------|----------|------------|------------|------------|----------|-----------------------------|
| AC1         | 2.61         | 1        | 59.72      | 0.00       | 0.00       | 6.23     | <b>4.80</b>                 |
| AC2         | 2.61         | 1        | 76.70      | 0.00       | 0.00       | 6.23     | <b>4.74</b>                 |
| AC3         | 2.61         | 1        | 76.70      | 0.00       | 0.00       | 6.23     | <b>4.74</b>                 |
| AC4         | 2.61         | 1        | 85.31      | 0.00       | 0.00       | 6.23     | <b>4.71</b>                 |
| AC5         | 2.61         | 1        | 55.45      | 0.00       | 0.00       | 6.23     | <b>4.82</b>                 |
| AC6         | 2.61         | 1        | 51.18      | 0.00       | 0.00       | 6.23     | <b>4.83</b>                 |
| AC7         | 2.61         | 1        | 55.70      | 0.00       | 9.12       | 15.35    | <b>4.76</b>                 |
| AC8         | 2.61         | 1        | 55.45      | 0.00       | 0.00       | 6.23     | <b>4.82</b>                 |
| AC9         | 2.61         | 1        | 55.45      | 0.00       | 9.12       | 15.35    | <b>4.76</b>                 |
| AC10        | 2.61         | 1        | 55.45      | 0.00       | 0.00       | 9.28     | <b>4.81</b>                 |
| AC11        | 2.61         | 1        | 57.66      | 35.73      | 0.00       | 13.99    | <b>4.59</b>                 |
| AC12        | 2.61         | 1        | 55.45      | 0.00       | 0.00       | 9.35     | <b>4.81</b>                 |
| AC13        | 2.61         | 1        | 108.72     | 0.00       | 0.00       | 6.23     | <b>4.63</b>                 |
| Galantamine | 2.77         | 0        | 114.49     | 0.00       | 12.94      | 0.00     | <b>5.14</b>                 |

**Table S9.** Values of selected descriptors used in prediction of pIC<sub>50</sub> of the synthesized chalcone derivatives (BACE-1)

| Compound     | petitjean | BCUT_PEOE_1 | a_ICM | chiral_u | rings | a_nN | PEOE_VSA-0 | PEOE_VSA-6 | logS  | SlogP_VSA3 | SlogP_VSA5 | Predicted pIC <sub>50</sub> |
|--------------|-----------|-------------|-------|----------|-------|------|------------|------------|-------|------------|------------|-----------------------------|
| AC1          | 0.47      | -0.63       | 1.41  | 0        | 4     | 2    | 144.11     | 0.00       | -6.42 | 36.88      | 68.90      | <b>6.52</b>                 |
| AC2          | 0.50      | -0.61       | 1.46  | 0        | 4     | 2    | 168.62     | 2.50       | -6.47 | 36.88      | 104.28     | <b>7.38</b>                 |
| AC3          | 0.47      | -0.61       | 1.46  | 0        | 4     | 2    | 168.62     | 2.50       | -6.47 | 36.88      | 104.28     | <b>7.37</b>                 |
| AC4          | 0.47      | -0.59       | 1.52  | 0        | 4     | 2    | 168.62     | 7.51       | -6.57 | 36.88      | 175.05     | <b>8.49</b>                 |
| AC5          | 0.50      | -0.63       | 1.52  | 0        | 4     | 2    | 168.62     | 0.00       | -7.15 | 36.88      | 68.90      | <b>7.25</b>                 |
| AC6          | 0.50      | -0.64       | 1.59  | 0        | 4     | 2    | 180.87     | 0.00       | -7.89 | 36.88      | 68.90      | <b>7.68</b>                 |
| AC7          | 0.47      | -0.64       | 1.62  | 0        | 4     | 2    | 178.67     | 0.00       | -7.45 | 36.88      | 68.90      | <b>7.63</b>                 |
| AC8          | 0.47      | -0.64       | 1.52  | 0        | 4     | 2    | 168.62     | 0.00       | -7.15 | 36.88      | 68.90      | <b>7.15</b>                 |
| AC9          | 0.50      | -0.63       | 1.52  | 0        | 4     | 2    | 168.62     | 0.00       | -6.71 | 36.88      | 68.90      | <b>7.12</b>                 |
| AC10         | 0.47      | -0.63       | 1.52  | 0        | 4     | 2    | 168.62     | 0.00       | -7.51 | 36.88      | 71.95      | <b>7.28</b>                 |
| AC11         | 0.47      | -0.56       | 1.62  | 0        | 4     | 2    | 156.36     | 0.00       | -7.48 | 36.88      | 68.90      | <b>7.99</b>                 |
| AC12         | 0.47      | -0.58       | 1.42  | 0        | 4     | 3    | 215.10     | 0.00       | -6.35 | 36.88      | 134.69     | <b>8.08</b>                 |
| AC13         | 0.48      | -0.64       | 1.41  | 0        | 5     | 2    | 170.83     | 2.50       | -8.24 | 36.88      | 68.90      | <b>7.20</b>                 |
| Verubecestat | 0.50      | -0.58       | 2.00  | 1        | 3     | 5    | 112.04     | 12.47      | -3.62 | 17.23      | 49.68      | <b>7.66</b>                 |
| Quercetin    | 0.50      | -0.63       | -1.52 | 0        | 3     | 0    | 61.27      | 41.34      | -2.77 | 25.39      | 5.24       | <b>5.24</b>                 |

Table S10. Spectra of synthesized chalcone derivatives

VIEN CONG NGHE HOA HOC  
01 Mac Dinh Chi - Q.1 - Tp HCM

IR

Tel: 08.38296127  
Fax: 08.38293889

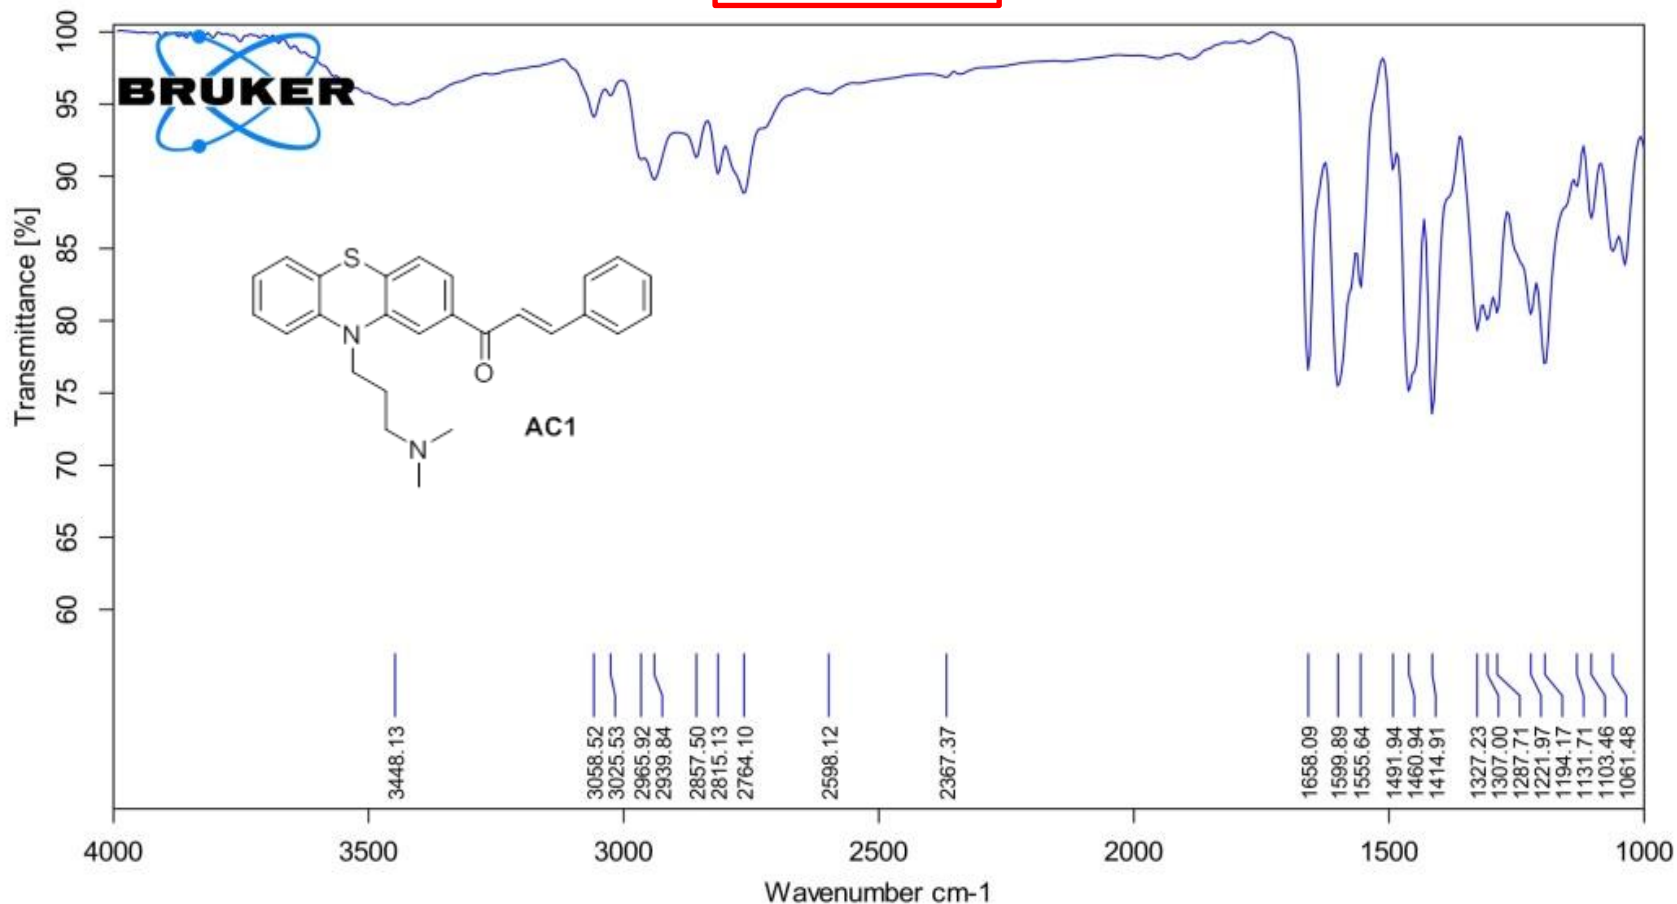

E:\OPUS 7\2017\THANG 6\20170606\C12.0

C12

SENSOR 27 - BRUKER - GERMANY

6/8/2017



# MS

## Qualitative Analysis Report

|                               |                       |                       |                             |
|-------------------------------|-----------------------|-----------------------|-----------------------------|
| <b>Data Filename</b>          | 01-AC1.d              | <b>Sample Name</b>    | 01-AC1                      |
| <b>Sample Type</b>            | Sample                | <b>Position</b>       | P2-A9                       |
| <b>Instrument Name</b>        | Instrument 1          | <b>User Name</b>      |                             |
| <b>Acq Method</b>             | Cot ngan - MSMS_Pos.m | <b>Acquired Time</b>  | 22/08/2020 10:06:30 AM      |
| <b>IRM Calibration Status</b> | Success               | <b>DA Method</b>      | COTNGAN.M.m                 |
| <b>Comment</b>                |                       |                       |                             |
| <b>Sample Group</b>           |                       | <b>Info.</b>          |                             |
| <b>Stream Name</b>            | LC 1                  | <b>Acquisition SW</b> | 6200 series TOF/6500 series |
|                               |                       | <b>Version</b>        | Q-TOF B.06.01 (B6172 SP1)   |

### User Chromatograms

Fragmentor Voltage 140 Collision Energy 0 Ionization Mode ESI

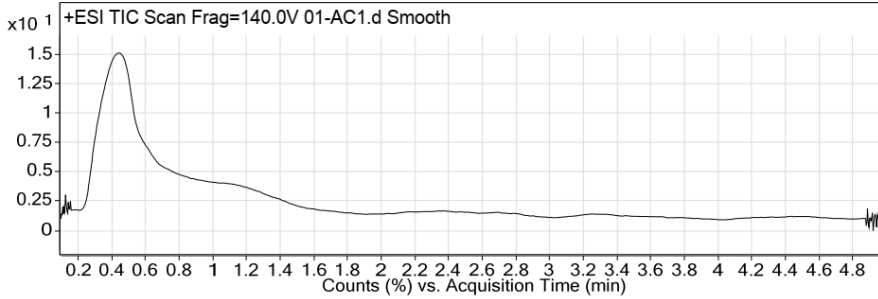

### User Spectra

Fragmentor Voltage 140 Collision Energy 0 Ionization Mode ESI

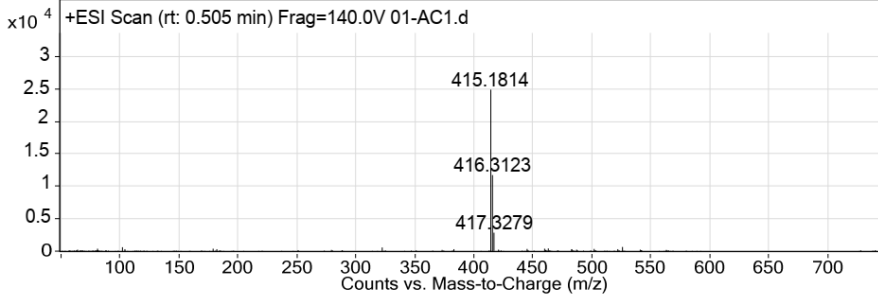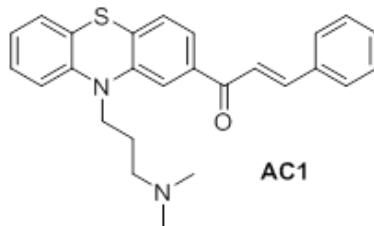

--- End Of Report ---

# MS

|               |          |             |                      |                 |              |                        |                        |
|---------------|----------|-------------|----------------------|-----------------|--------------|------------------------|------------------------|
| Sample Name   | 01-AC1   | Position    | P2-A9                | Instrument Name | Instrument 1 | User Name              |                        |
| Inj Vol       | 2        | InjPosition |                      | SampleType      | Sample       | IRM Calibration Status | Success                |
| Data Filename | 01-AC1.d | ACQ Method  | Cot ngan - MSMS_Pos. | Comment         |              | Acquired Time          | 22/08/2020 10:06:30 AM |

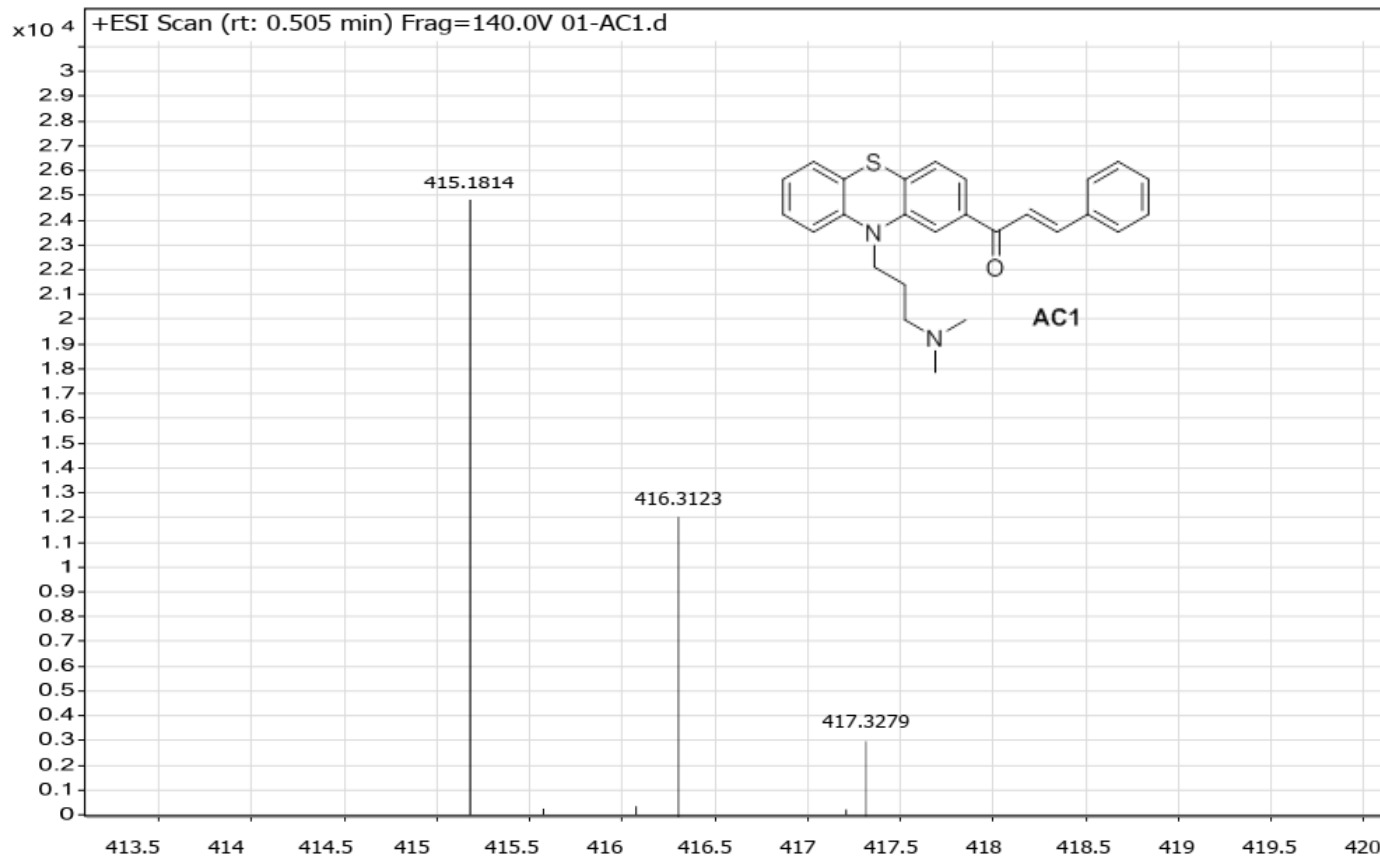

# <sup>1</sup>H-NMR

C12-MeOD-1H

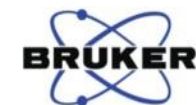

7.776  
7.744  
7.705  
7.699  
7.678  
7.646  
7.620  
7.618  
7.604  
7.602  
7.483  
7.417  
7.410  
7.405  
7.212  
7.210  
7.195  
7.195  
7.172  
7.156  
7.095  
7.093  
7.080  
6.971  
6.954  
6.939  
6.924  
3.954  
3.941  
3.927  
3.333  
3.330  
3.327  
2.526  
2.511  
2.496  
2.221  
1.966  
1.952  
1.938  
1.923  
1.909

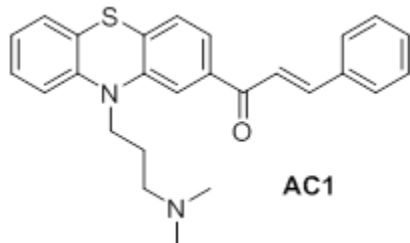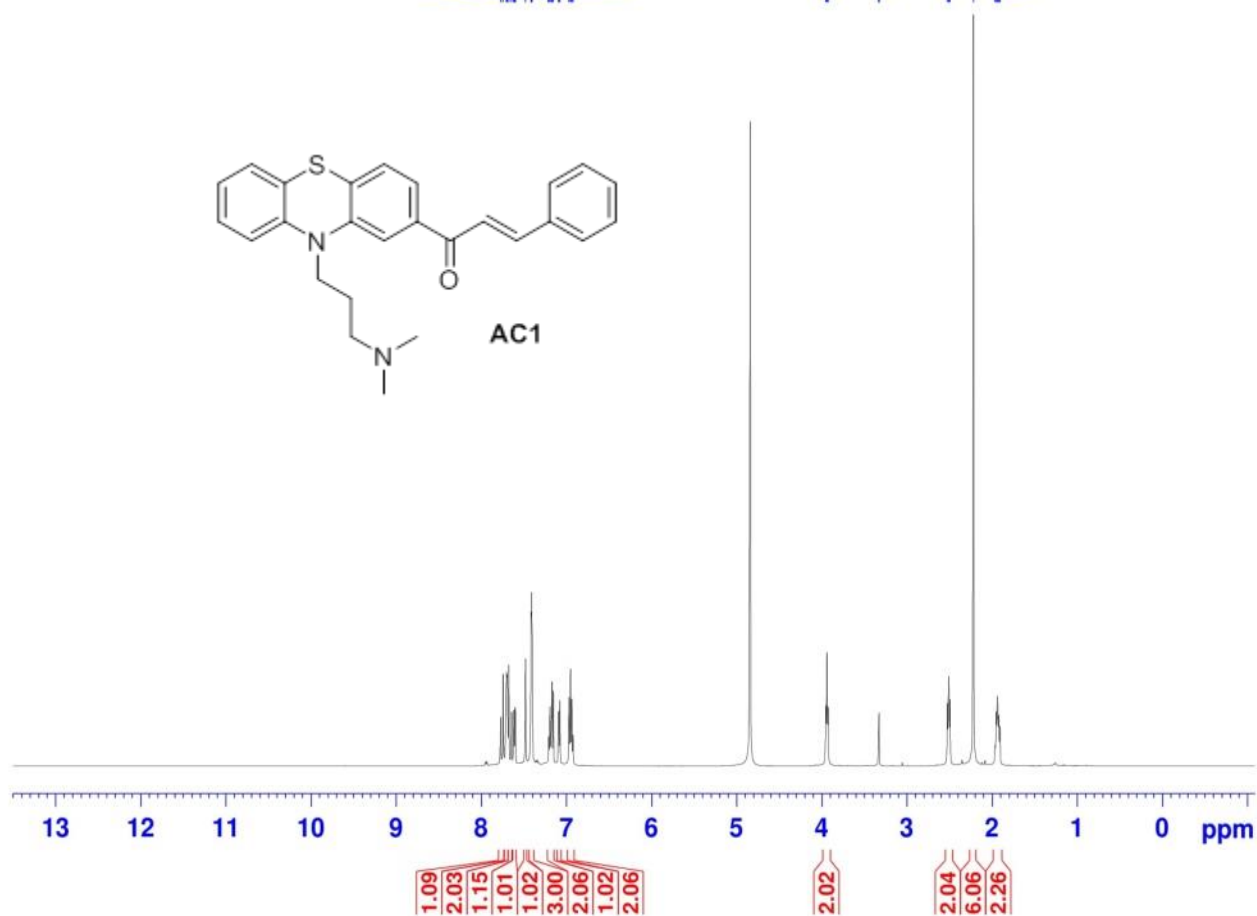

Current Data Parameters  
NAME 114DAO\_C12  
EXPNO 1  
PROCNO 1

F2 - Acquisition Parameters  
Date\_ 20170704  
Time 11.31  
INSTRUM spect  
PROBHD 5 mm PABBO BB/  
PULPROG zg30  
TD 65536  
SOLVENT MeOD  
NS 16  
DS 2  
SWH 10000.000 Hz  
FIDRES 0.152588 Hz  
AQ 3.2767999 sec  
RG 50.73  
DW 50.000 usec  
DE 6.50 usec  
TE 303.0 K  
D1 1.00000000 sec  
TD0 1

===== CHANNEL f1 =====  
SFO1 500.2030889 MHz  
NUC1 1H  
P1 10.00 usec  
PLW1 22.00000000 W

F2 - Processing parameters  
SI 65536  
SF 500.2000017 MHz  
WDW EM  
SSB 0  
LB 0.30 Hz  
GB 0  
PC 1.00

# <sup>1</sup>H-NMR

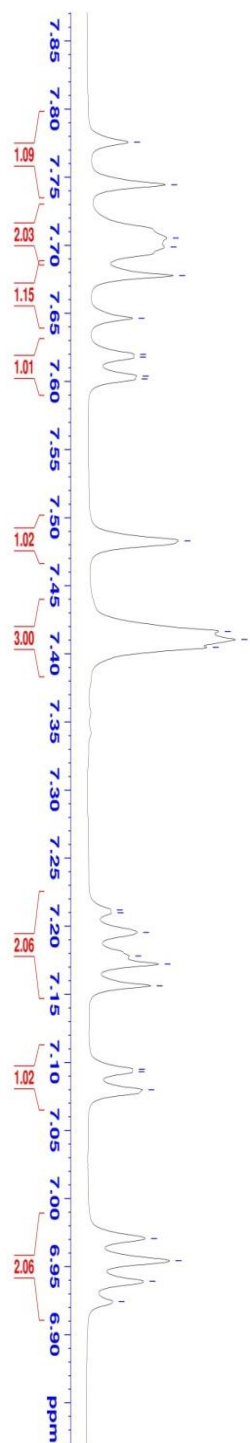

7.776  
7.744  
7.705  
7.699  
7.678  
7.646  
7.620  
7.618  
7.604  
7.602

C12-MeOD-1H

7.483  
7.417  
7.410  
7.405

7.212  
7.210  
7.195  
7.178  
7.172  
7.156

7.095  
7.093  
7.080

6.971  
6.954  
6.939  
6.924

BRUKER

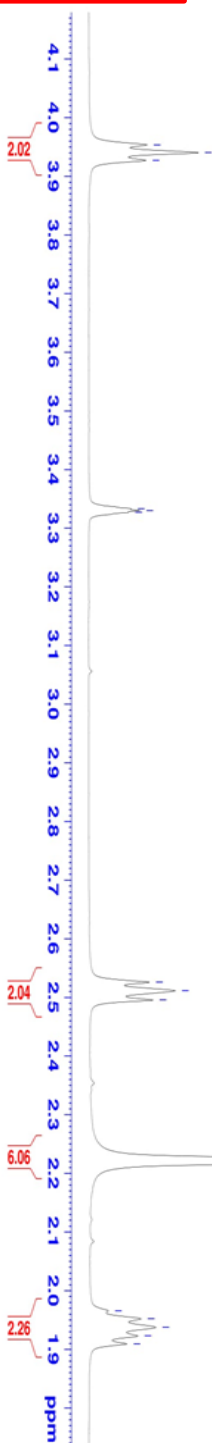

3.954  
3.941  
3.927

3.333  
3.330  
3.327

2.526  
2.511  
2.496

2.221

1.966  
1.952  
1.938  
1.923  
1.909

C12-MeOD-1H

BRUKER

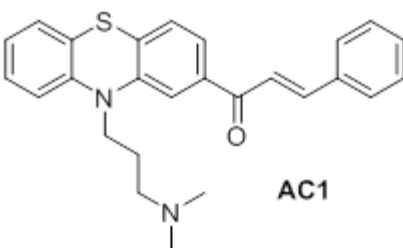

# <sup>13</sup>C-NMR

C12-MeOD-C13CPD

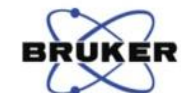

Current Data Parameters  
NAME 114DAO\_C12  
EXPNO 2  
PROCNO 1

F2 - Acquisition Parameters  
Date\_ 20170705  
Time 14.51  
INSTRUM spect  
PROBHD 5 mm PABBO BB/  
PULPROG zgpg30  
TD 65536  
SOLVENT MeOD  
NS 128  
DS 4  
SWH 29761.904 Hz  
FIDRES 0.454131 Hz  
AQ 1.1010048 sec  
RG 198.57  
DW 16.800 usec  
DE 6.50 usec  
TE 303.0 K  
D1 2.00000000 sec  
D11 0.03000000 sec  
TD0 1

==== CHANNEL f1 =====  
SFO1 125.7879670 MHz  
NUC1 13C  
P1 10.00 usec  
PLW1 88.00000000 W

==== CHANNEL f2 =====  
SFO2 500.2020008 MHz  
NUC2 1H  
CPDPRG[2] waltz16  
PCPD2 80.00 usec  
PLW2 22.00000000 W  
PLW12 0.34375000 W  
PLW13 0.22000000 W

F2 - Processing parameters  
SI 32768  
SF 125.7752211 MHz  
WDW EM  
SSB 0  
LB 1.00 Hz  
GB 0  
PC 1.40

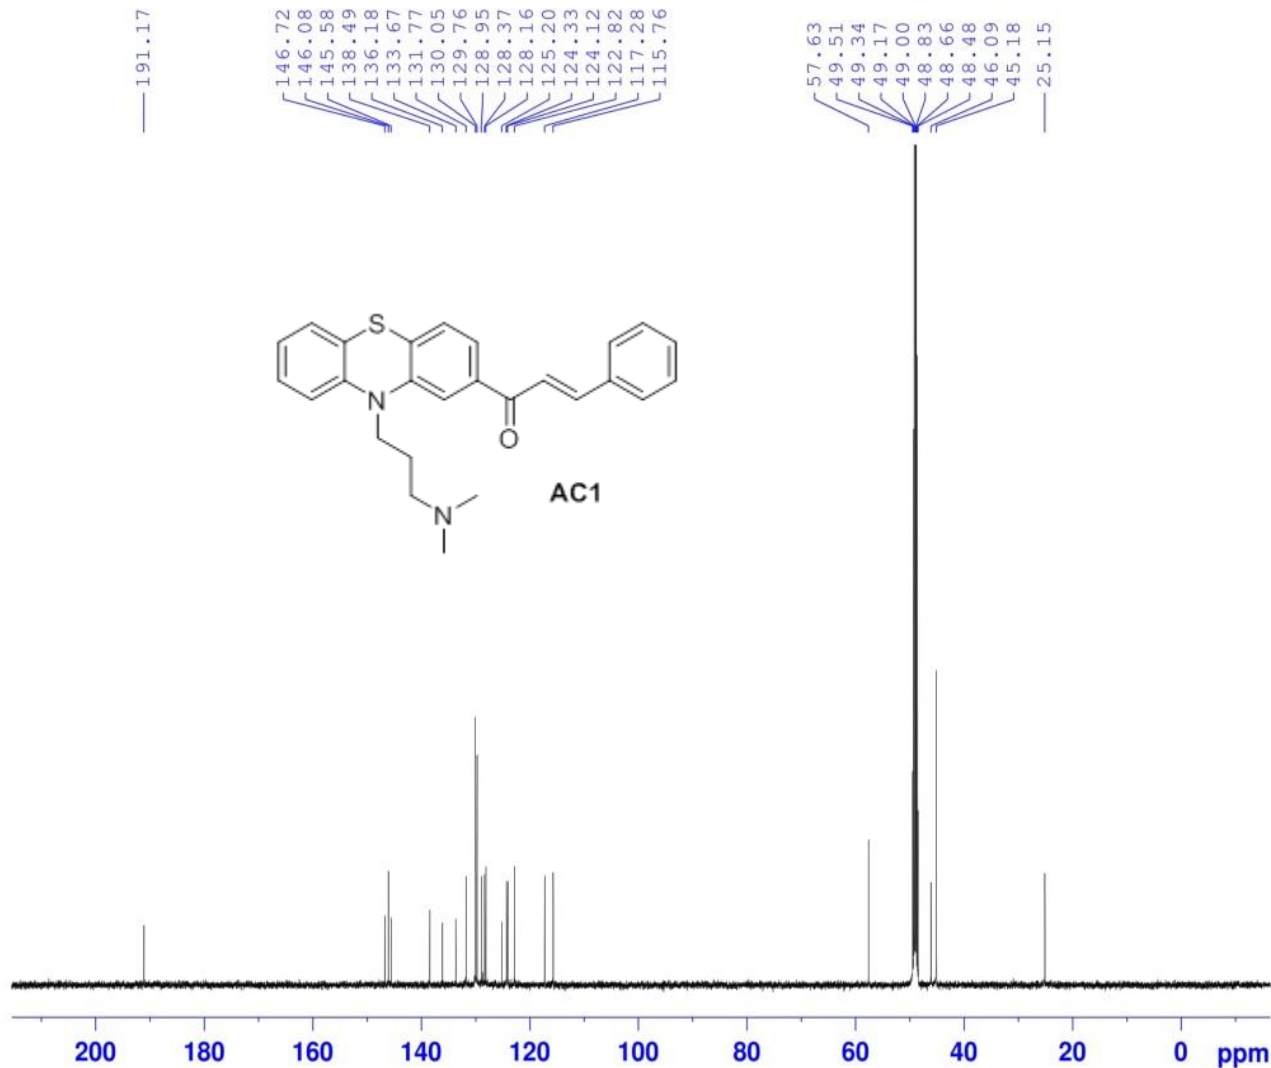

# $^{13}\text{C}$ -NMR

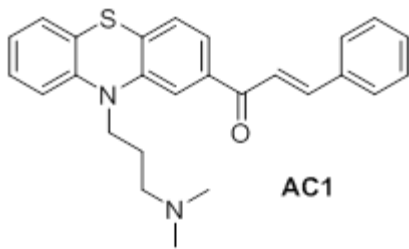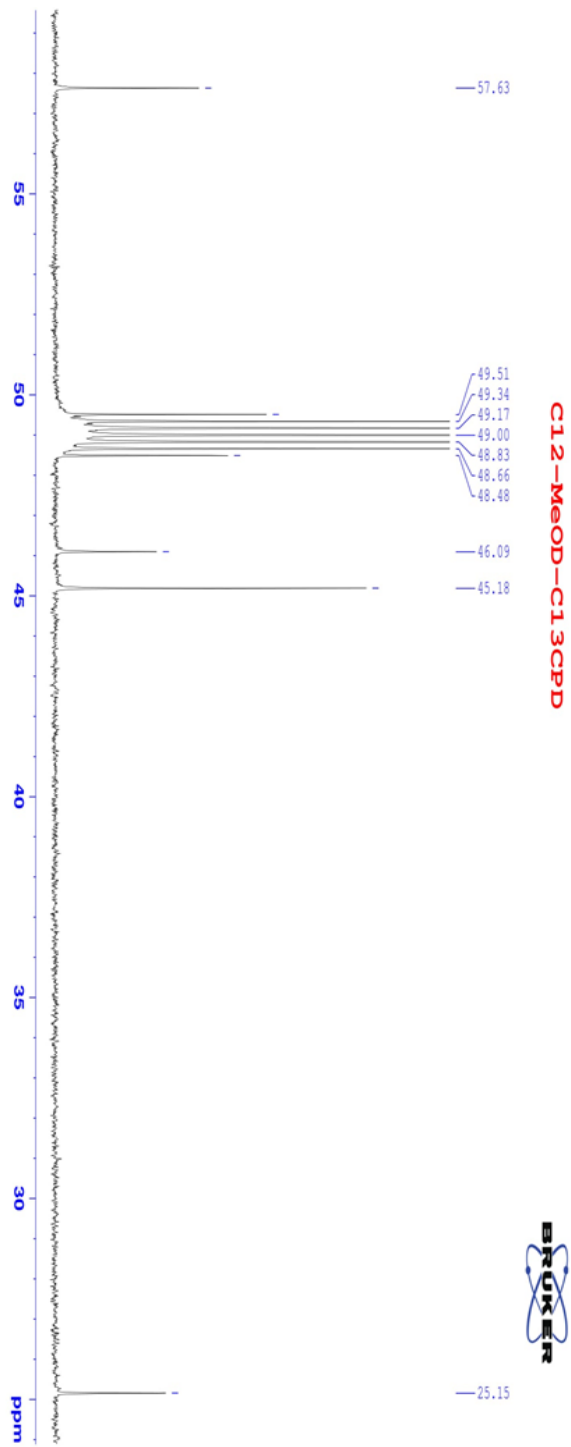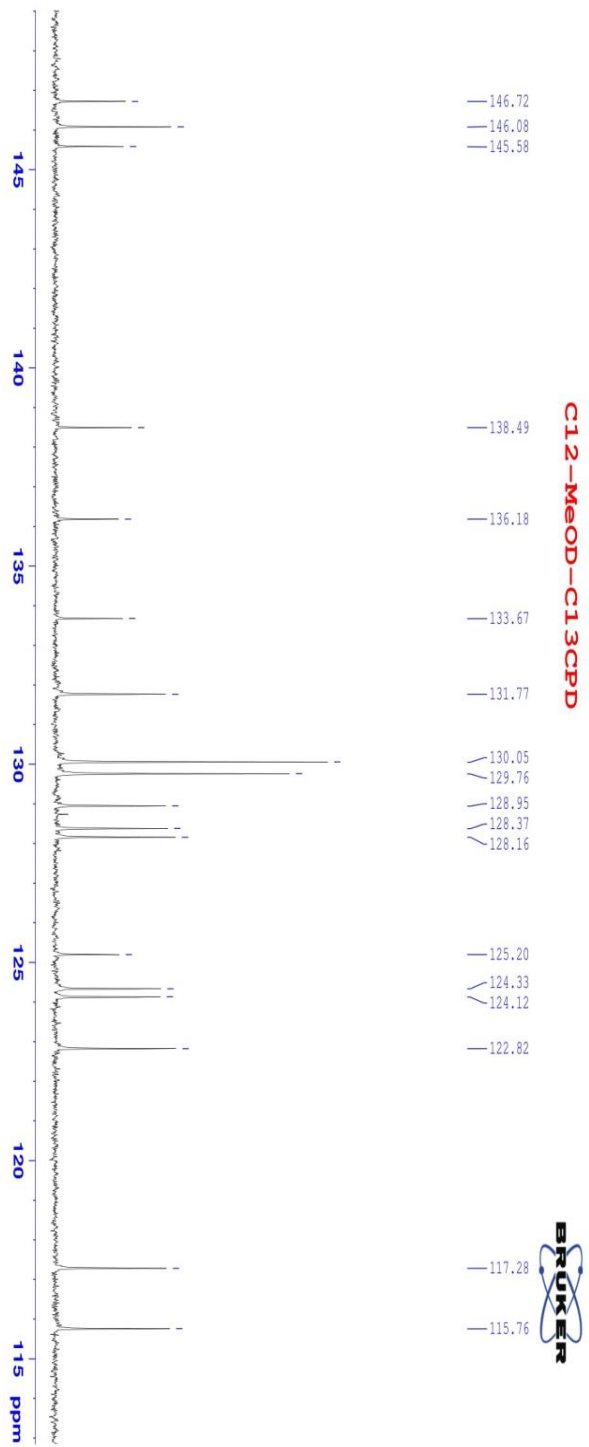

IR

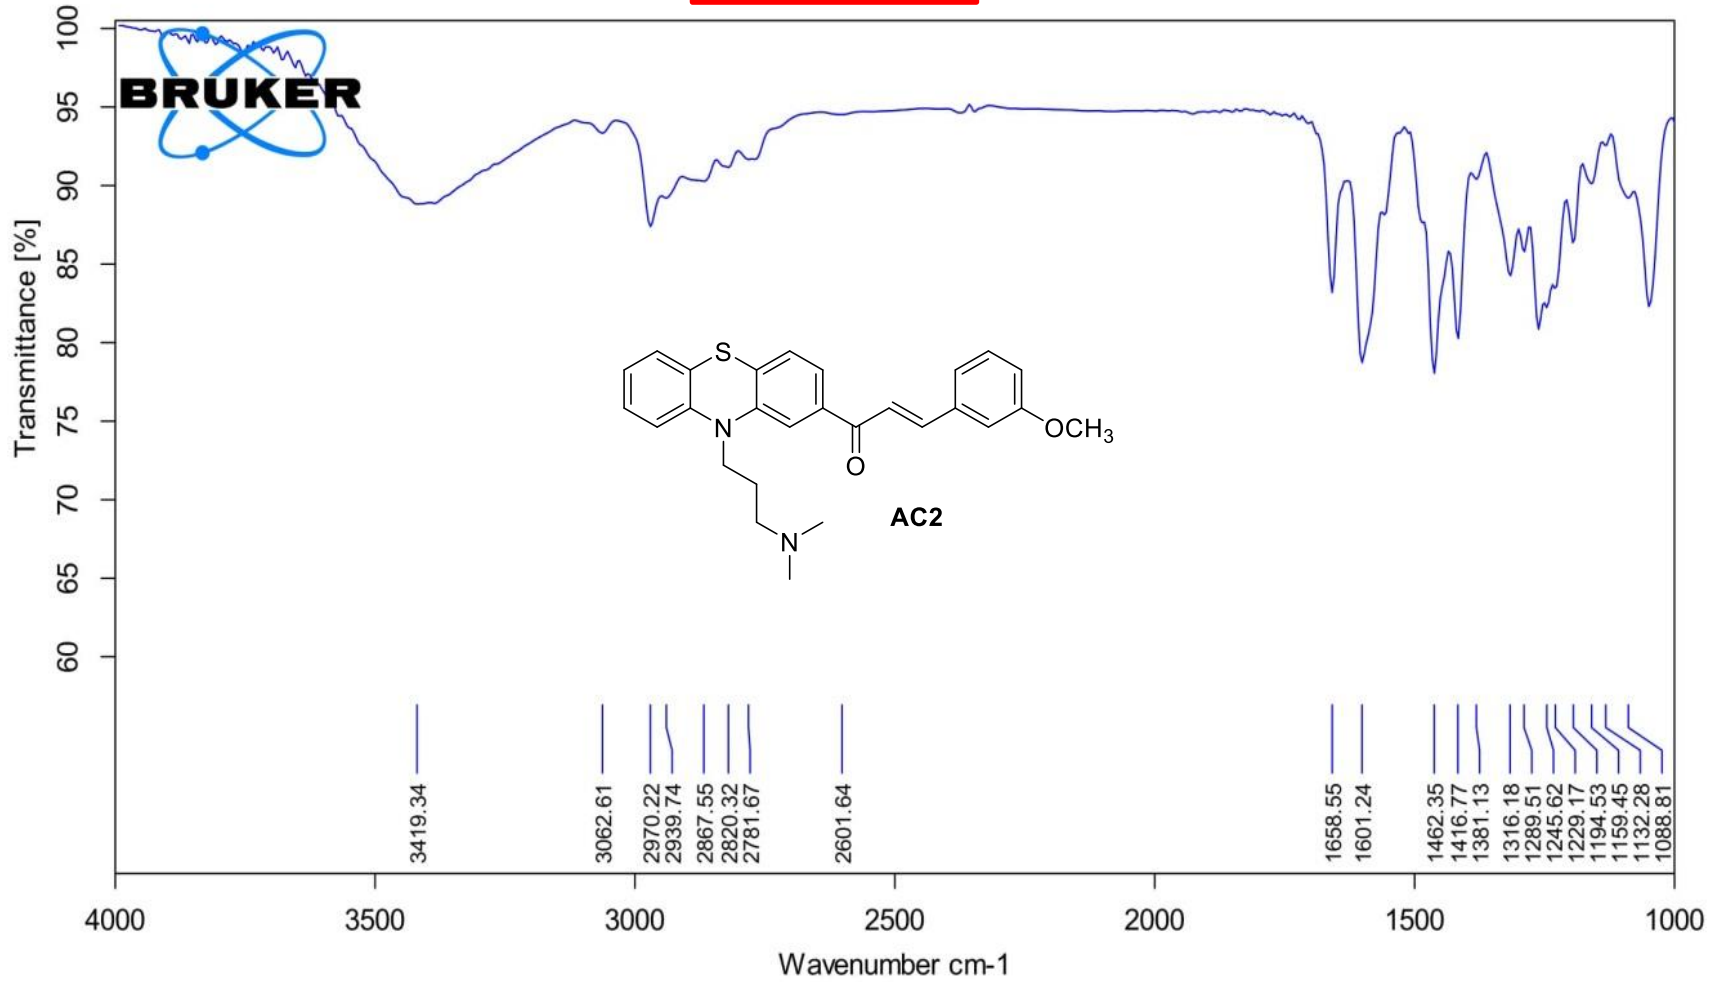

# MS

## Qualitative Analysis Report

|                               |                       |                       |                             |
|-------------------------------|-----------------------|-----------------------|-----------------------------|
| <b>Data Filename</b>          | 02-AC2.d              | <b>Sample Name</b>    | 02-AC2                      |
| <b>Sample Type</b>            | Sample                | <b>Position</b>       | P2-C6                       |
| <b>Instrument Name</b>        | Instrument 1          | <b>User Name</b>      |                             |
| <b>Acq Method</b>             | Cot ngan - MSMS_Pos.m | <b>Acquired Time</b>  | 22/08/2020 10:13:59 AM      |
| <b>IRM Calibration Status</b> | Success               | <b>DA Method</b>      | COTNGAN.M.m                 |
| <b>Comment</b>                |                       |                       |                             |
| <b>Sample Group</b>           |                       | <b>Info.</b>          |                             |
| <b>Stream Name</b>            | LC 1                  | <b>Acquisition SW</b> | 6200 series TOF/6500 series |
|                               |                       | <b>Version</b>        | Q-TOF B.06.01 (B6172 SP1)   |

### User Chromatograms

Fragmentor Voltage 140 Collision Energy 0 Ionization Mode ESI

+ESI TIC Scan Frag=140.0V 02-AC2.d Smooth

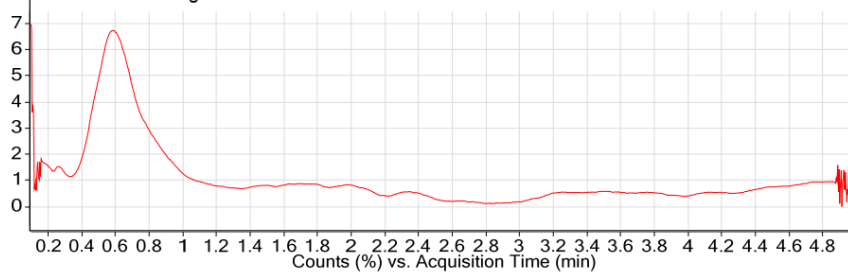

### User Spectra

Fragmentor Voltage 140 Collision Energy 0 Ionization Mode ESI

+ESI Scan (rt: 0.505 min) Frag=140.0V 02-AC2.d

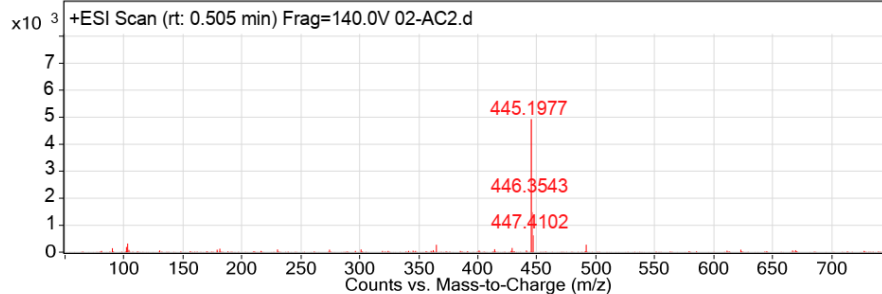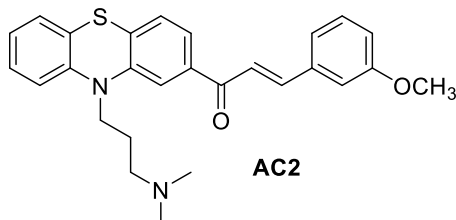

--- End Of Report ---



# MS

|               |          |             |                      |                 |              |                        |                        |
|---------------|----------|-------------|----------------------|-----------------|--------------|------------------------|------------------------|
| Sample Name   | 02-AC2   | Position    | P2-C6                | Instrument Name | Instrument 1 | User Name              |                        |
| Inj Vol       | 2        | InjPosition |                      | SampleType      | Sample       | IRM Calibration Status | Success                |
| Data Filename | 02-AC2.d | ACQ Method  | Cot ngan - MSMS_Pos. | Comment         |              | Acquired Time          | 22/08/2020 10:13:59 AM |

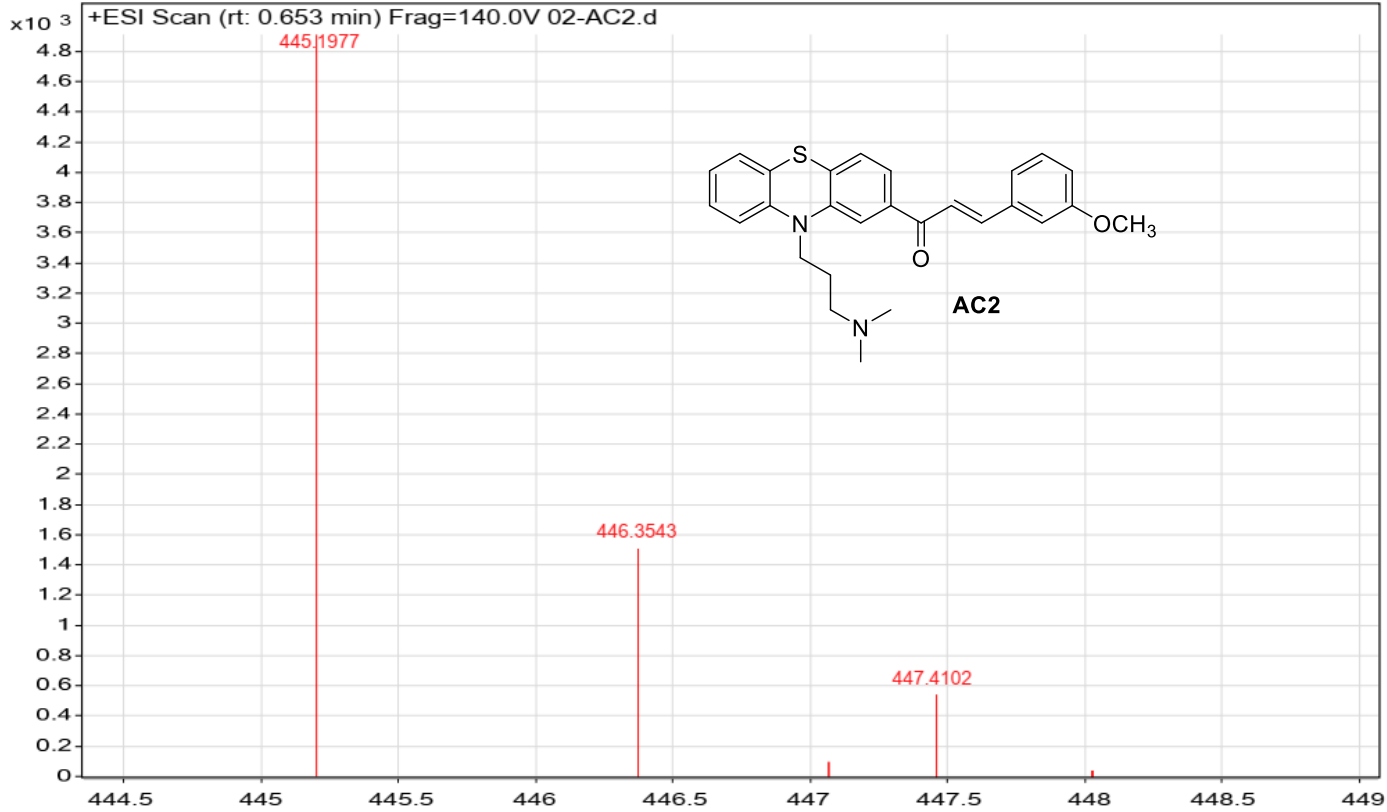

# <sup>1</sup>H-NMR

C3-MeOD-1H

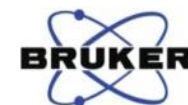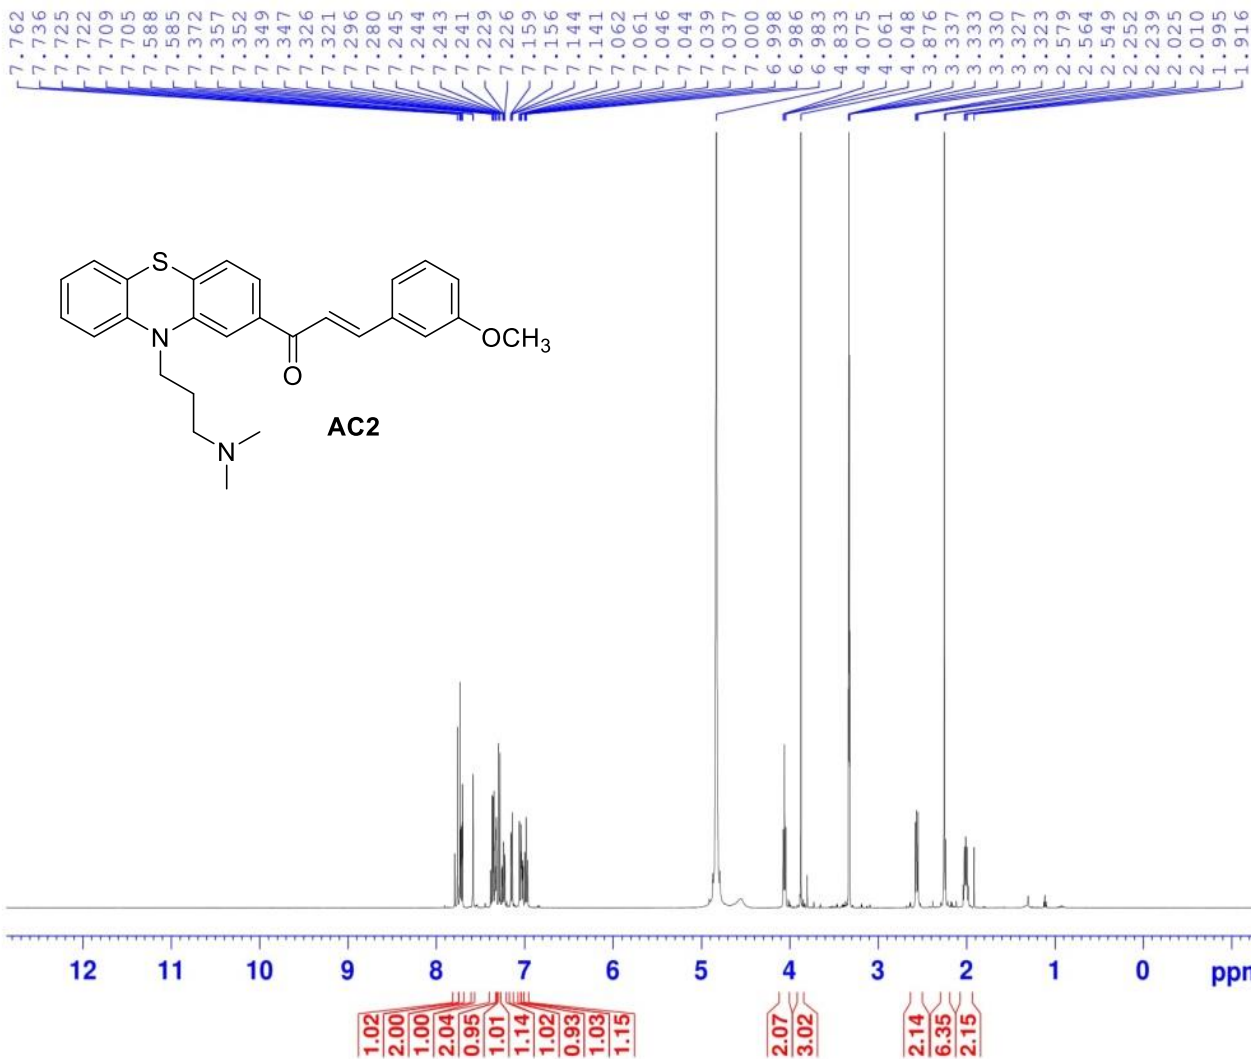

Current Data Parameters  
NAME 113D\_C3  
EXPNO 1  
PROCNO 1

F2 - Acquisition Parameters  
Date\_ 20170606  
Time 16.02  
INSTRUM spect  
PROBHD 5 mm PABBO BB/  
PULPROG zg30  
TD 65536  
SOLVENT MeOD  
NS 16  
DS 2  
SWH 10000.000 Hz  
FIDRES 0.152588 Hz  
AQ 3.2767999 sec  
RG 127.68  
DW 50.000 usec  
DE 6.50 usec  
TE 303.0 K  
D1 1.00000000 sec  
TD0 1

===== CHANNEL f1 =====  
SFO1 500.2030889 MHz  
NUC1 1H  
P1 10.00 usec  
PLW1 22.00000000 W

F2 - Processing parameters  
SI 65536  
SF 500.2000000 MHz  
WDW EM  
SSB 0  
LB 0.30 Hz  
GB 0  
PC 1.00

# <sup>1</sup>H-NMR

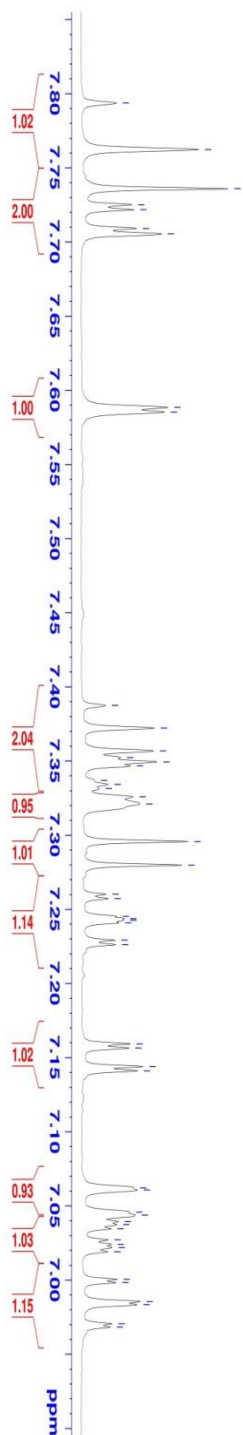

7.794  
7.762  
7.736  
7.725  
7.722  
7.709  
7.705

7.588  
7.585

7.387  
7.372  
7.357  
7.352  
7.349  
7.347  
7.337  
7.334  
7.331  
7.326  
7.321  
7.296  
7.280  
7.260  
7.257  
7.245  
7.244  
7.243  
7.241  
7.229  
7.226  
7.159  
7.156  
7.144  
7.141  
7.062  
7.061  
7.046  
7.044  
7.039  
7.037  
7.035  
7.027  
7.024  
7.022  
7.019  
7.000  
6.998  
6.986  
6.983

**C3-MeOD-1H**

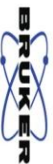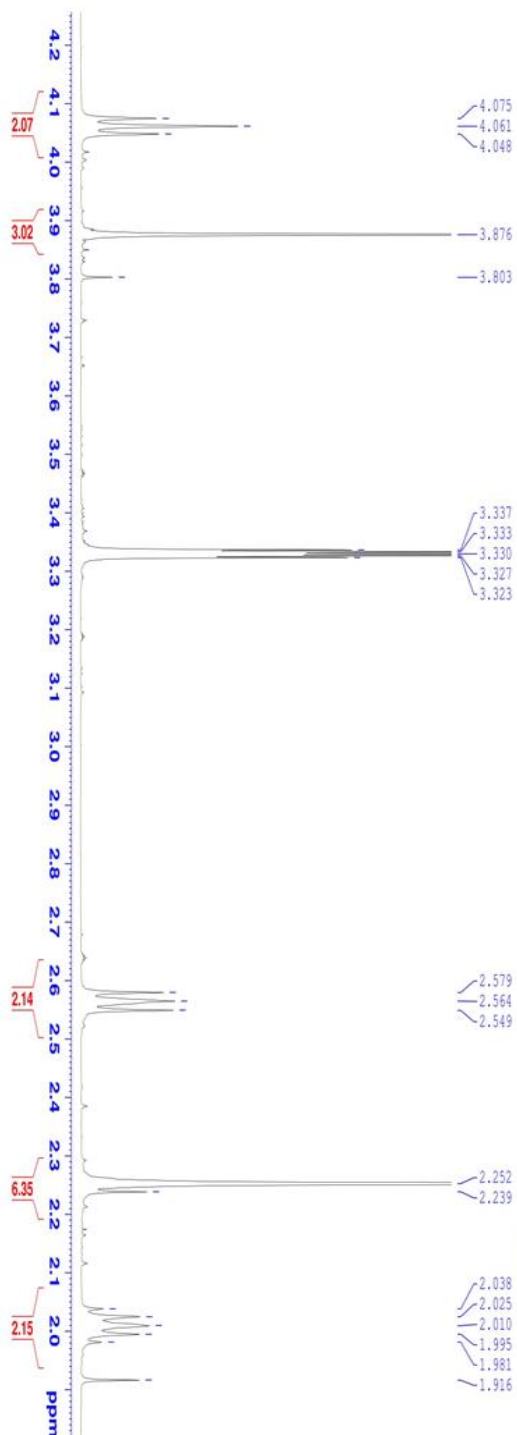

4.075  
4.061  
4.048

3.876  
3.803

3.337  
3.333  
3.330  
3.327  
3.323

2.579  
2.564  
2.549

2.252  
2.239

2.038  
2.025  
2.010  
1.995  
1.981  
1.916

**C3-MeOD-1H**

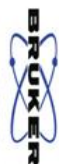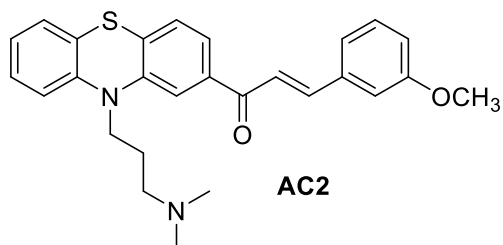

# <sup>13</sup>C-NMR

C3-MeOD-C13CPD

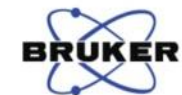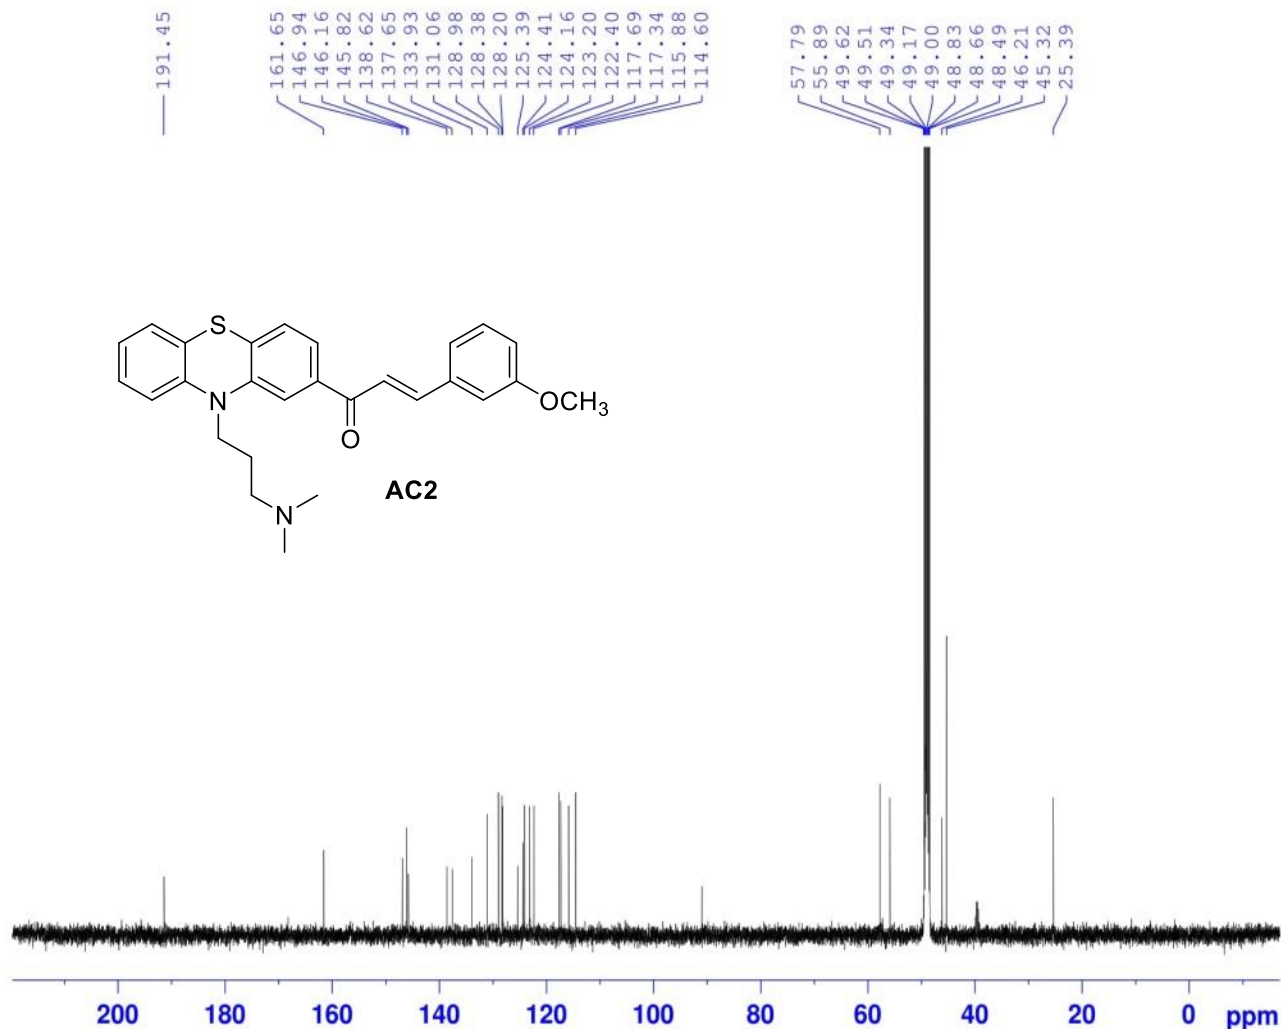

Current Data Parameters  
NAME 113D\_C3  
EXPNO 2  
PROCNO 1

F2 - Acquisition Parameters  
Date\_ 20170606  
Time\_ 17.57  
INSTRUM spect  
PROBHD 5 mm PABBO BB/  
PULPROG zgpg30  
TD 65536  
SOLVENT MeOD  
NS 2048  
DS 4  
SWH 29761.904 Hz  
FIDRES 0.454131 Hz  
AQ 1.1010048 sec  
RG 198.57  
DW 16.800 usec  
DE 6.50 usec  
TE 303.0 K  
D1 2.00000000 sec  
D11 0.03000000 sec  
TD0 1

----- CHANNEL f1 -----  
SFO1 125.7879670 MHz  
NUC1 13C  
P1 10.00 usec  
PLW1 88.00000000 W

----- CHANNEL f2 -----  
SFO2 500.2020008 MHz  
NUC2 1H  
CPDPRG[2] waltz16  
PCPD2 80.00 usec  
PLW2 22.00000000 W  
PLW12 0.34375000 W  
PLW13 0.22000000 W

F2 - Processing parameters  
SI 32768  
SF 125.7753900 MHz  
WDW EM  
SSB 0  
LB 1.00 Hz  
GB 0  
PC 1.40

# $^{13}\text{C}$ -NMR

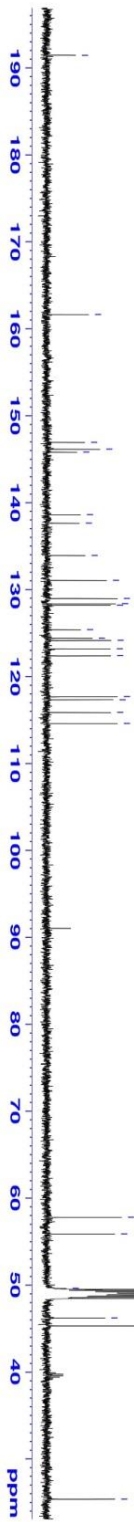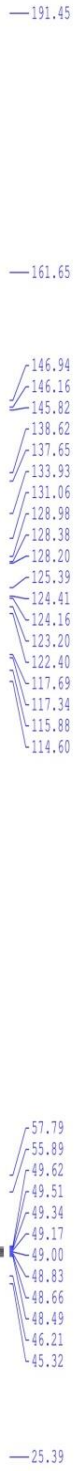

C3-MeOD-C13CPD

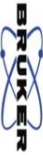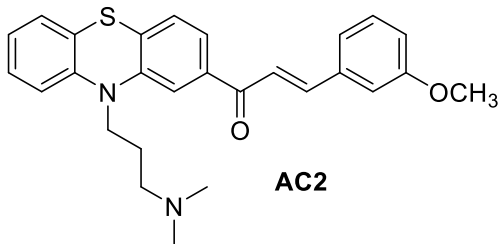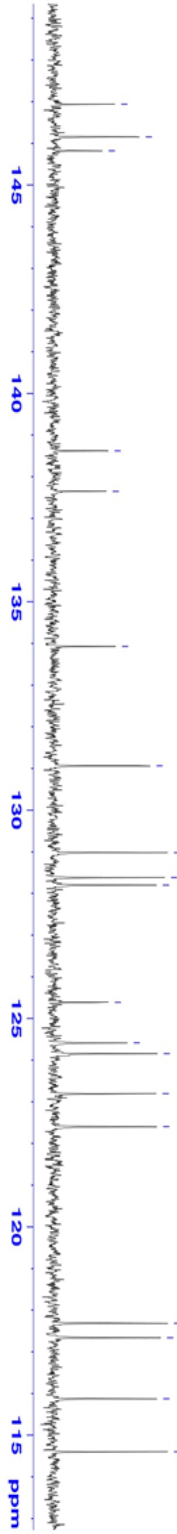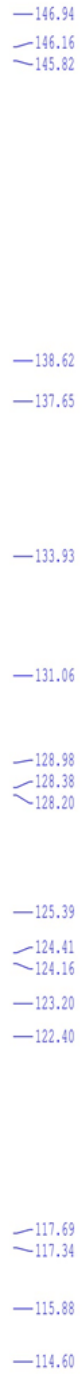

C3-MeOD-C13CPD

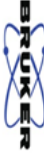

# $^{13}\text{C}$ -NMR

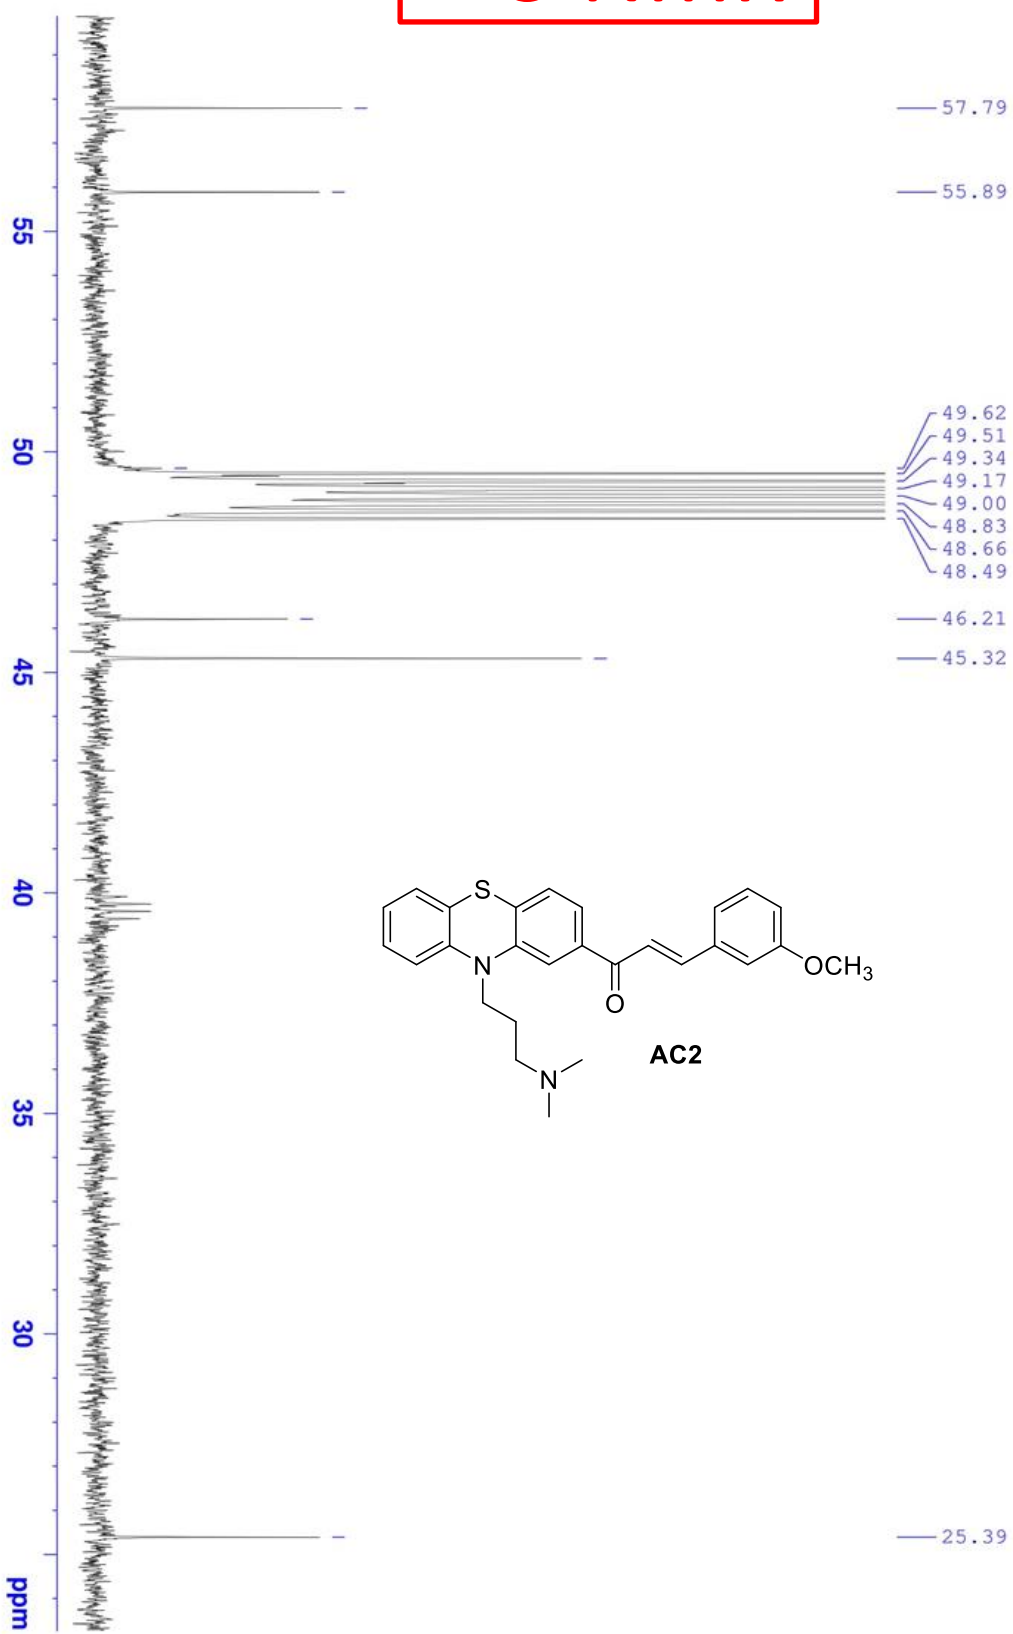

C3-MeOD-C13CPD

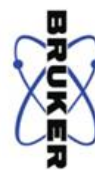

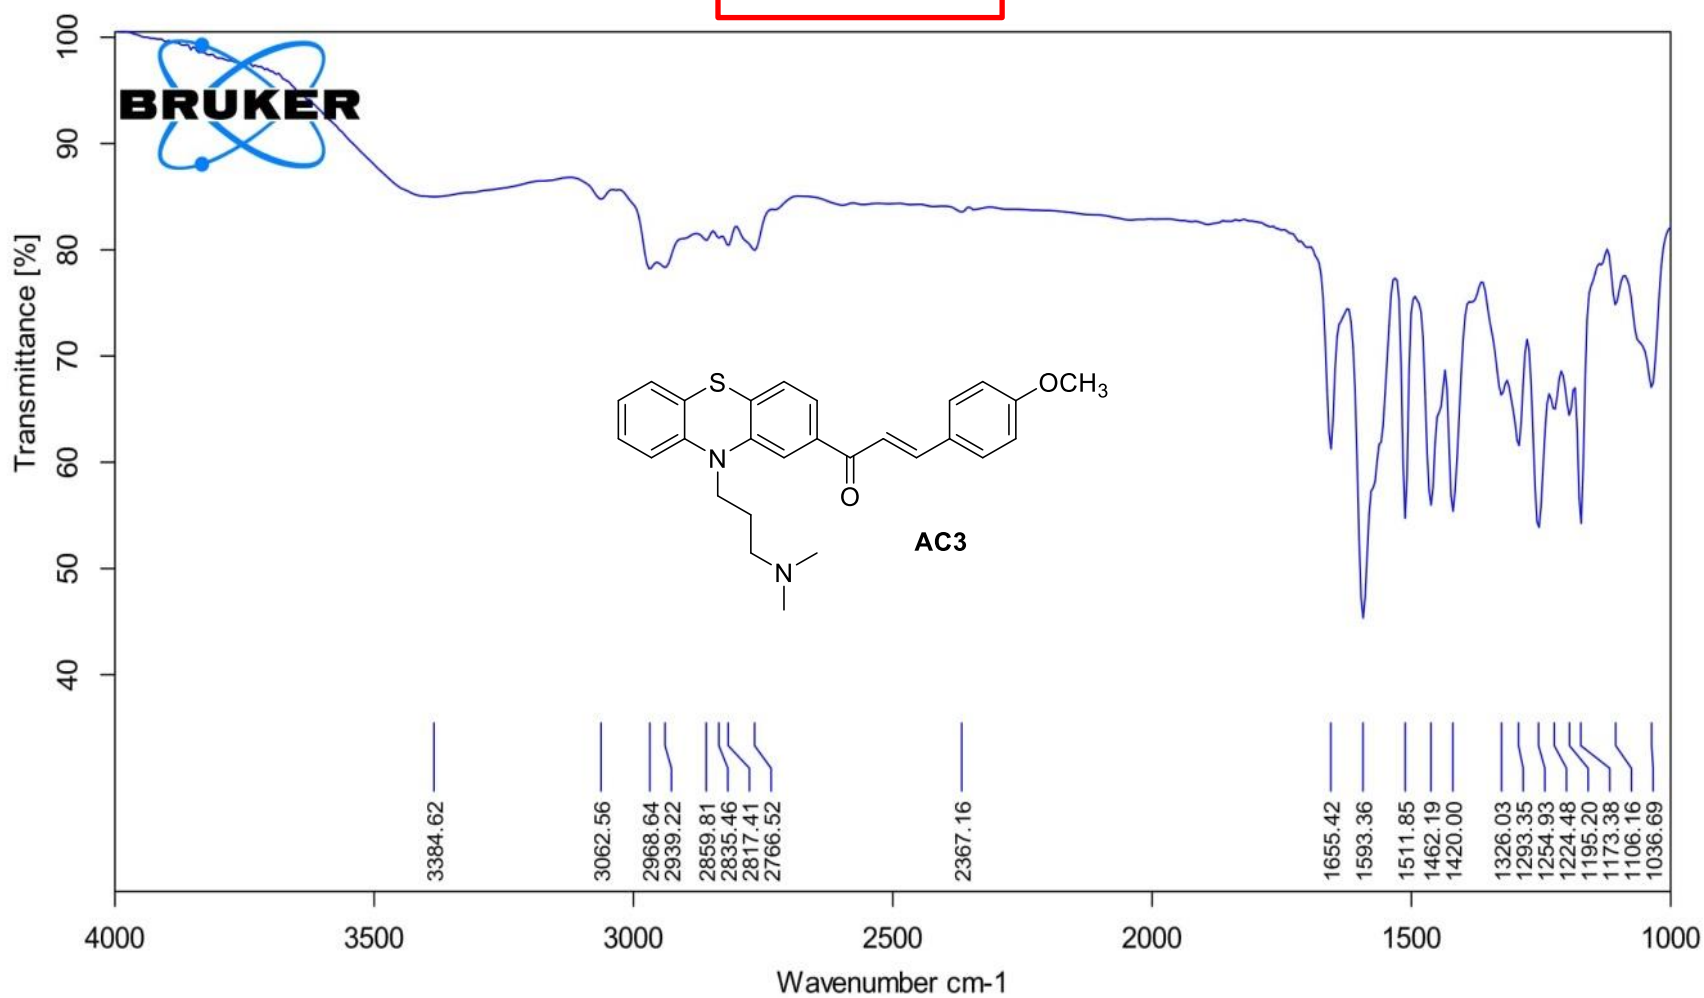

# MS

## Qualitative Analysis Report

|                               |                       |                       |                             |
|-------------------------------|-----------------------|-----------------------|-----------------------------|
| <b>Data Filename</b>          | 03-AC3.d              | <b>Sample Name</b>    | 03-AC3                      |
| <b>Sample Type</b>            | Sample                | <b>Position</b>       | P2-C4                       |
| <b>Instrument Name</b>        | Instrument 1          | <b>User Name</b>      |                             |
| <b>Acq Method</b>             | Cot ngan - MSMS_Pos.m | <b>Acquired Time</b>  | 22/08/2020 10:21:51 AM      |
| <b>IRM Calibration Status</b> | Success               | <b>DA Method</b>      | COTNGAN.M.m                 |
| <b>Comment</b>                |                       |                       |                             |
| <b>Sample Group</b>           |                       | <b>Info.</b>          |                             |
| <b>Stream Name</b>            | LC 1                  | <b>Acquisition SW</b> | 6200 series TOF/6500 series |
|                               |                       | <b>Version</b>        | Q-TOF B.06.01 (B6172 SP1)   |

### User Chromatograms

Fragmentor Voltage 140 Collision Energy 0 Ionization Mode ESI

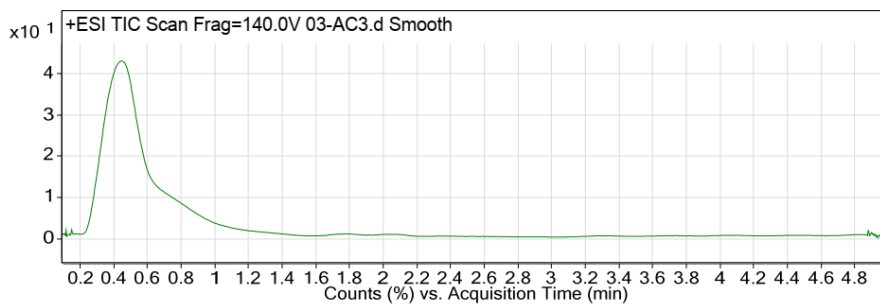

### User Spectra

Fragmentor Voltage 140 Collision Energy 0 Ionization Mode ESI

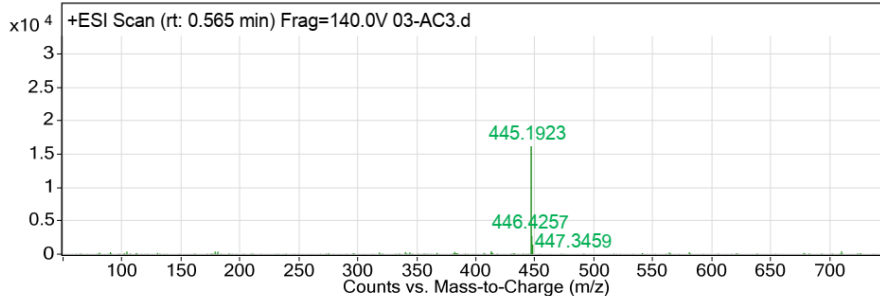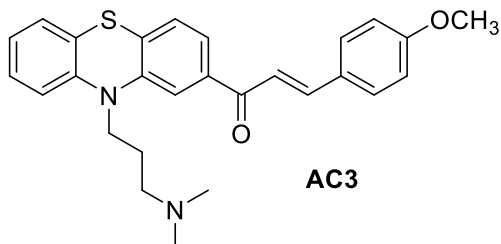

--- End Of Report ---



# MS

|               |          |             |                      |                 |              |                        |                        |
|---------------|----------|-------------|----------------------|-----------------|--------------|------------------------|------------------------|
| Sample Name   | 03-AC3   | Position    | P2-C4                | Instrument Name | Instrument 1 | User Name              |                        |
| Inj Vol       | 2        | InjPosition |                      | SampleType      | Sample       | IRM Calibration Status | Success                |
| Data Filename | 03-AC3.d | ACQ Method  | Cot ngan - MSMS_Pos. | Comment         |              | Acquired Time          | 22/08/2020 10:21:51 PM |

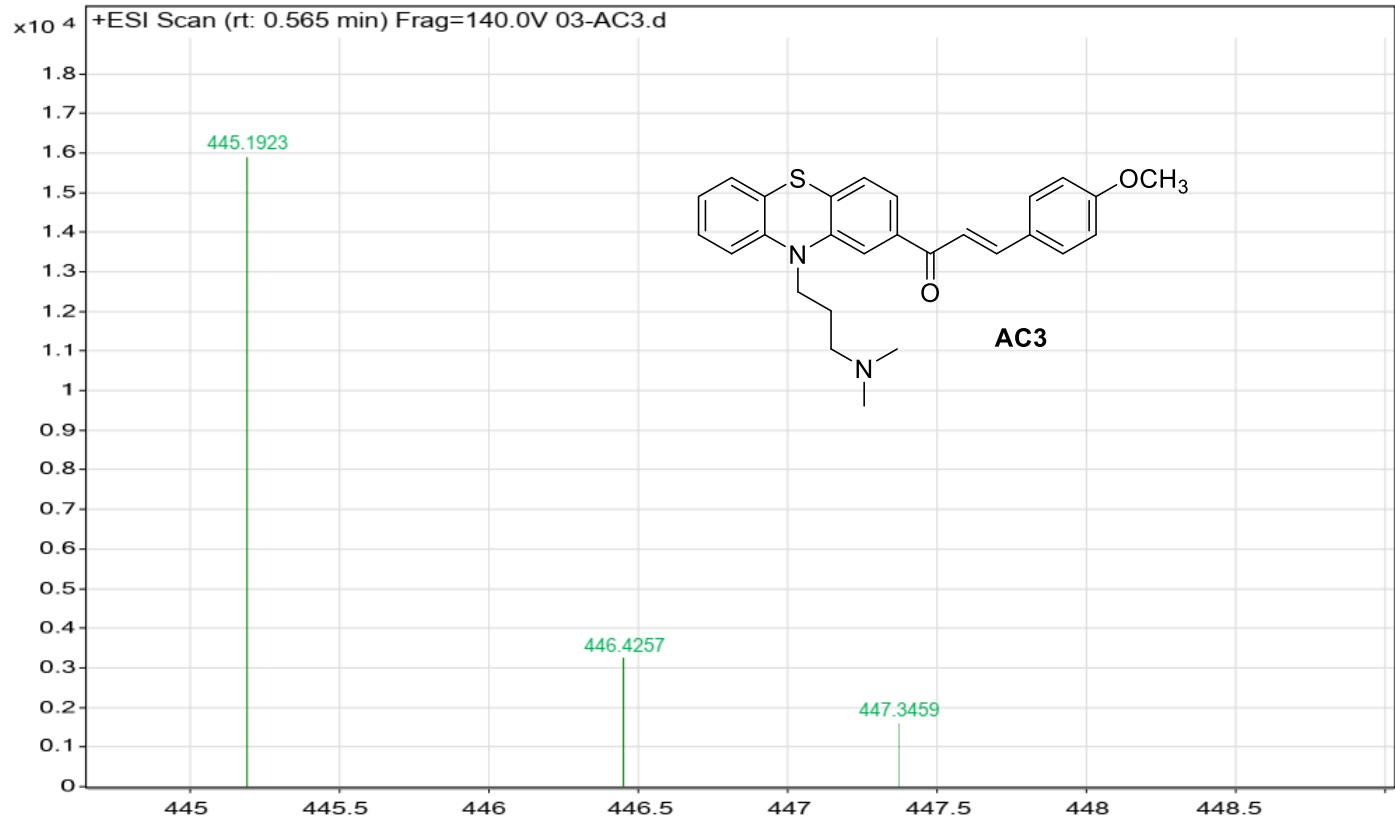

# <sup>1</sup>H-NMR

C2-MeOD-1H

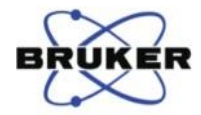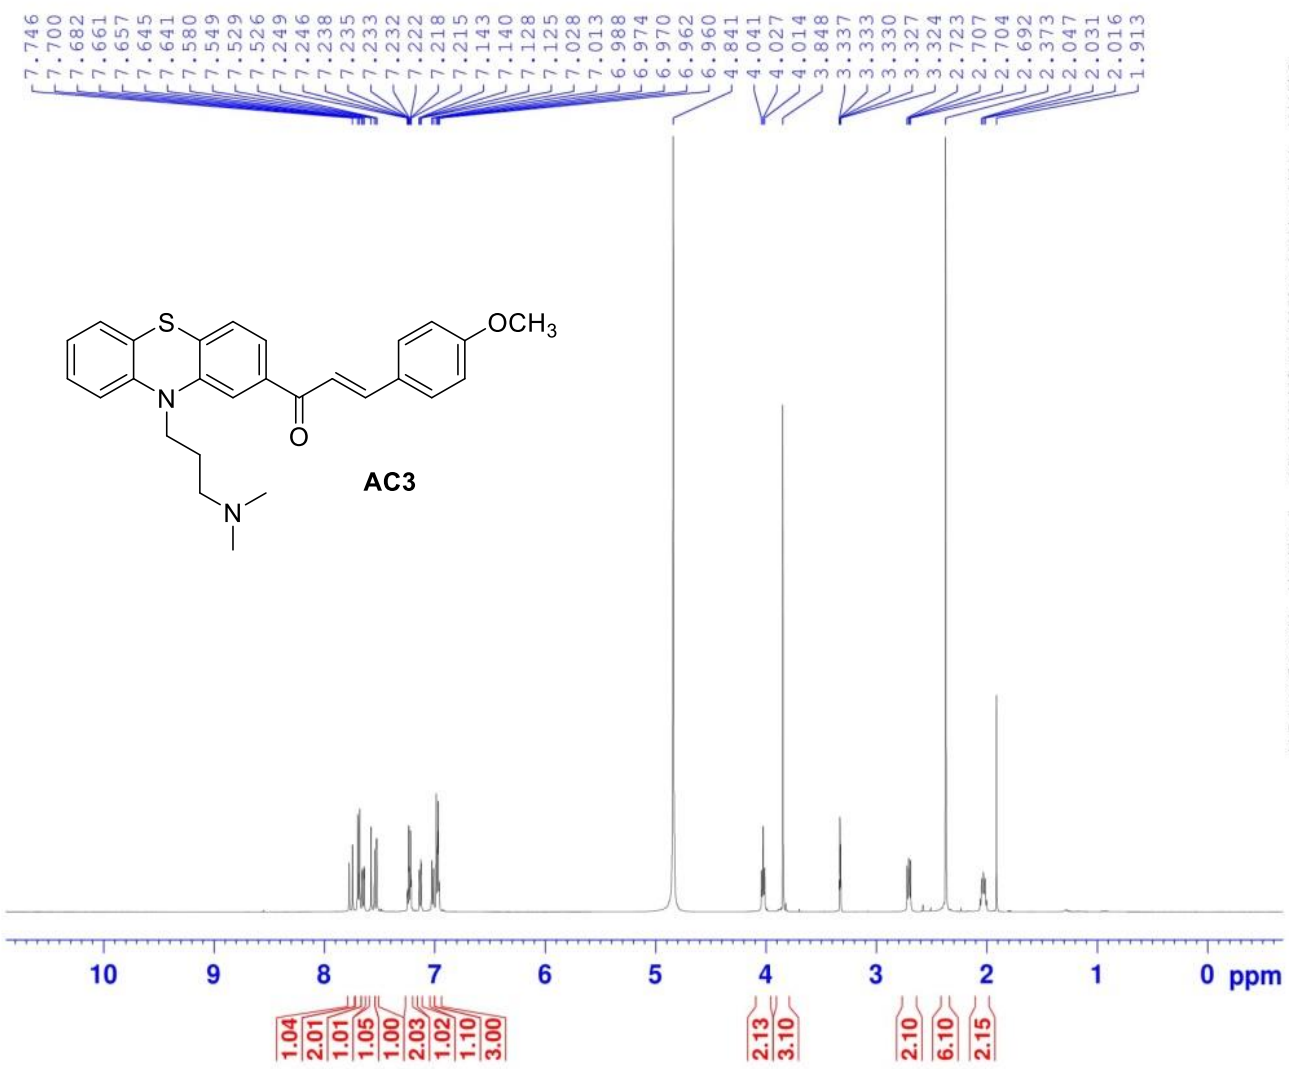

```
Current Data Parameters
NAME          113D_C2
EXPNO         1
PROCNO        1

F2 - Acquisition Parameters
Date_         20170606
Time          15.13
INSTRUM       spect
PROBHD        5 mm PABBO BB/
PULPROG       zg30
TD            65536
SOLVENT       MeOD
NS            16
DS            2
SWH           10000.000 Hz
FIDRES        0.152588 Hz
AQ            3.2767999 sec
RG            79.36
DW            50.000 usec
DE            6.50 usec
TE            303.0 K
D1            1.00000000 sec
TD0           1

===== CHANNEL f1 =====
SFO1          500.2030889 MHz
NUC1           1H
P1            10.00 usec
PLW1          22.00000000 W

F2 - Processing parameters
SI            65536
SF            500.2000002 MHz
WDW           EM
SSB           0
LB            0.30 Hz
GB            0
PC            1.00
```

# <sup>1</sup>H-NMR

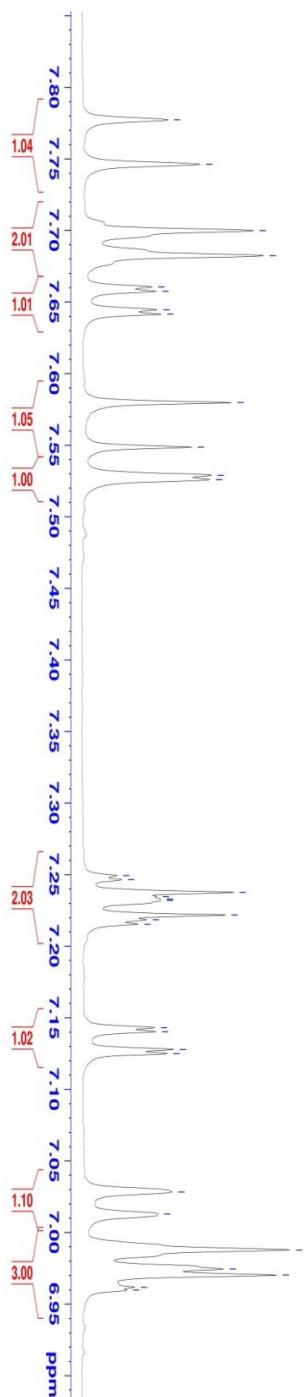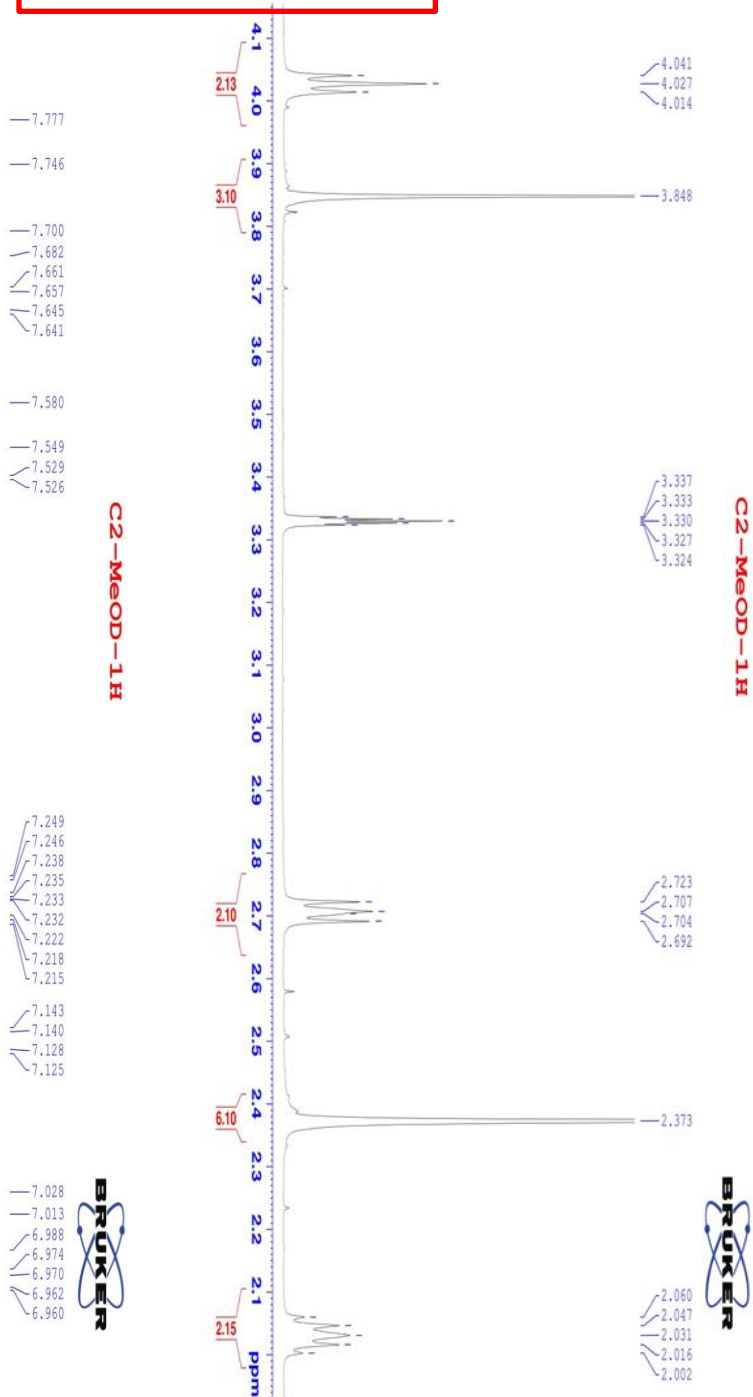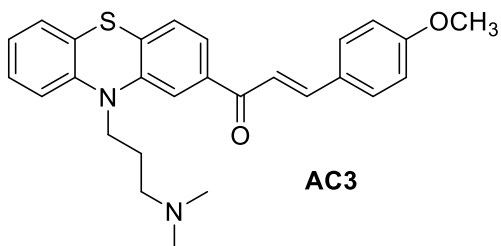

# $^{13}\text{C}$ -NMR

C2-MeOD-C13CPD

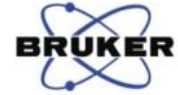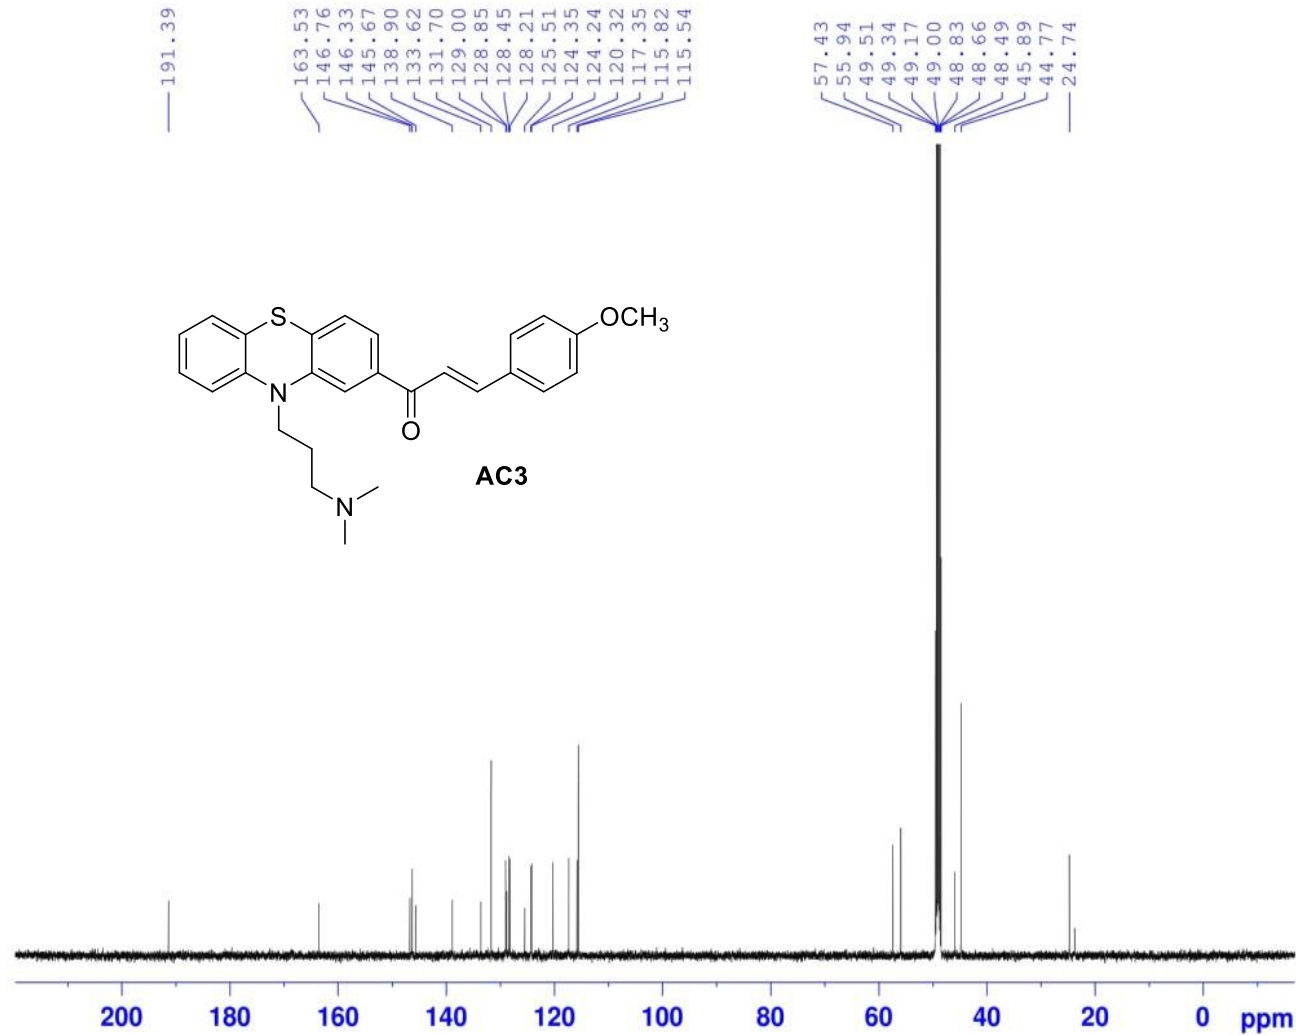

Current Data Parameters  
NAME 113D\_C2  
EXPNO 2  
PROCNO 1

F2 - Acquisition Parameters  
Date\_ 20170606  
Time 15.57  
INSTRUM spect  
PROBHD 5 mm PABBO BB/  
PULPROG zgpg30  
TD 65536  
SOLVENT MeOD  
NS 256  
DS 4  
SWH 29761.904 Hz  
FIDRES 0.454131 Hz  
AQ 1.1010048 sec  
RG 198.57  
DW 16.800 usec  
DE 6.50 usec  
TE 303.0 K  
D1 2.00000000 sec  
D11 0.03000000 sec  
TD0 1

===== CHANNEL f1 =====  
SFO1 125.7879670 MHz  
NUC1 13C  
P1 10.00 usec  
PLW1 88.00000000 W

===== CHANNEL f2 =====  
SFO2 500.2020008 MHz  
NUC2 1H  
CPDPRG[2] waltz16  
PCPD2 80.00 usec  
PLW2 22.00000000 W  
PLW12 0.34375000 W  
PLW13 0.22000000 W

F2 - Processing parameters  
SI 32768  
SF 125.7753900 MHz  
WDW EM  
SSB 0  
LB 1.00 Hz  
GB 0  
PC 1.40

# $^{13}\text{C}$ -NMR

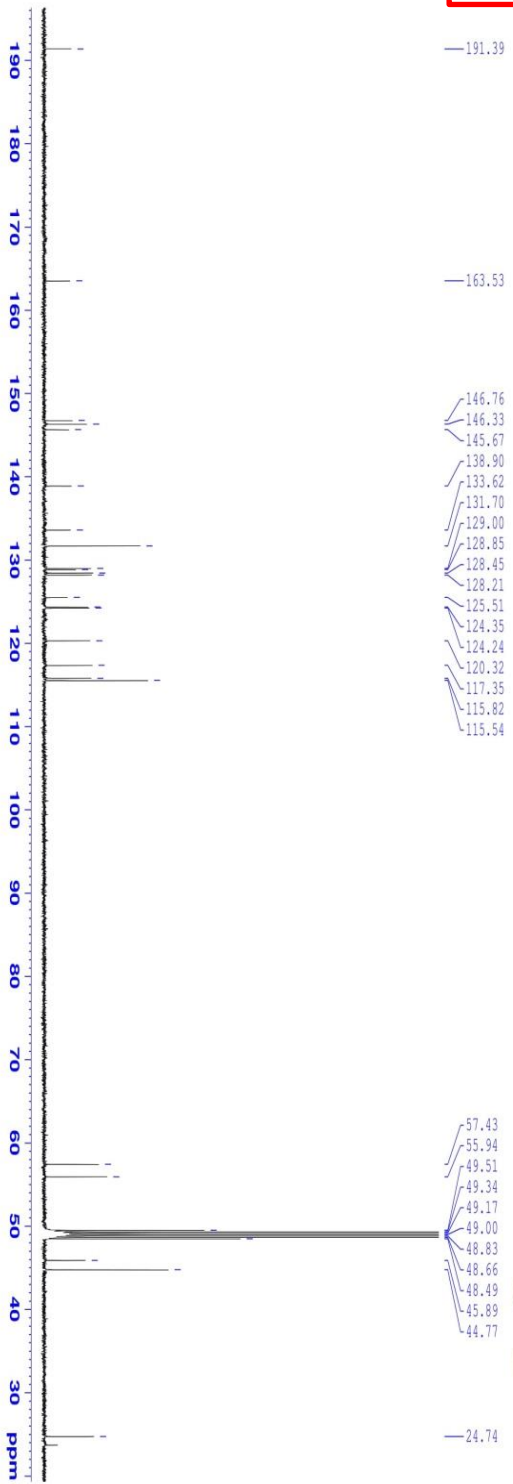

C2-MeOD-C13CPD

BRUKER

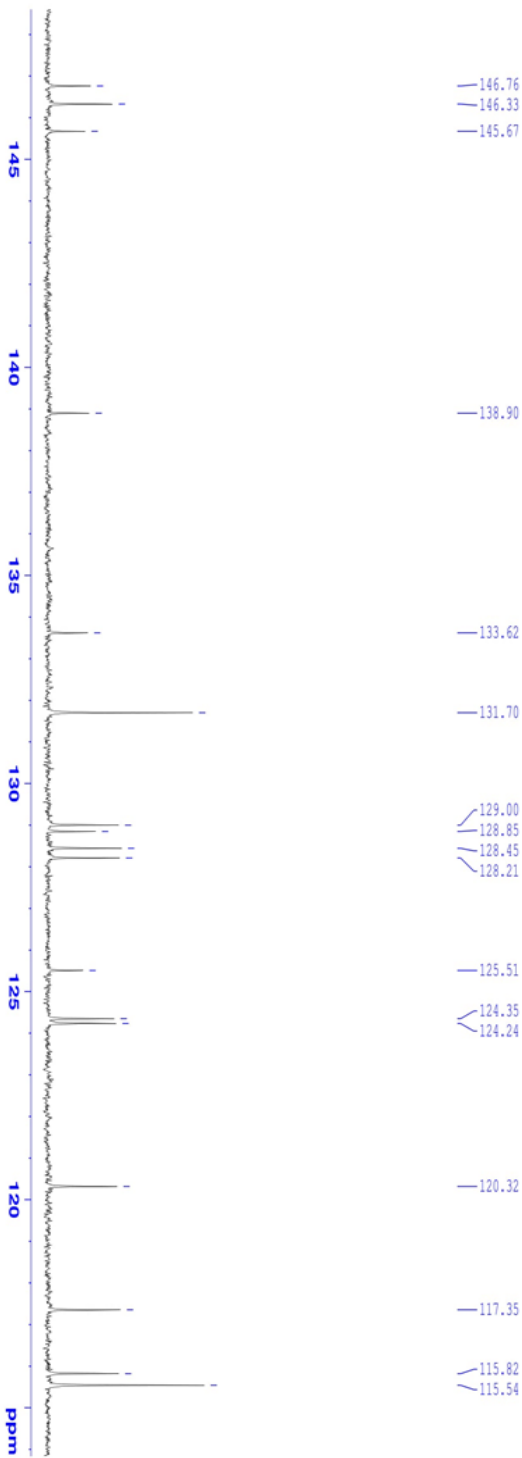

C2-MeOD-C13CPD

BRUKER

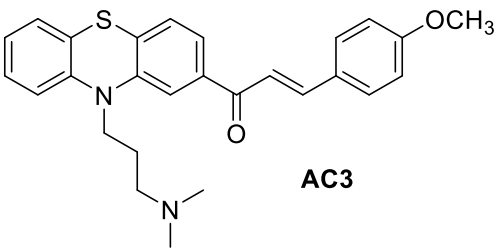

# $^{13}\text{C-NMR}$

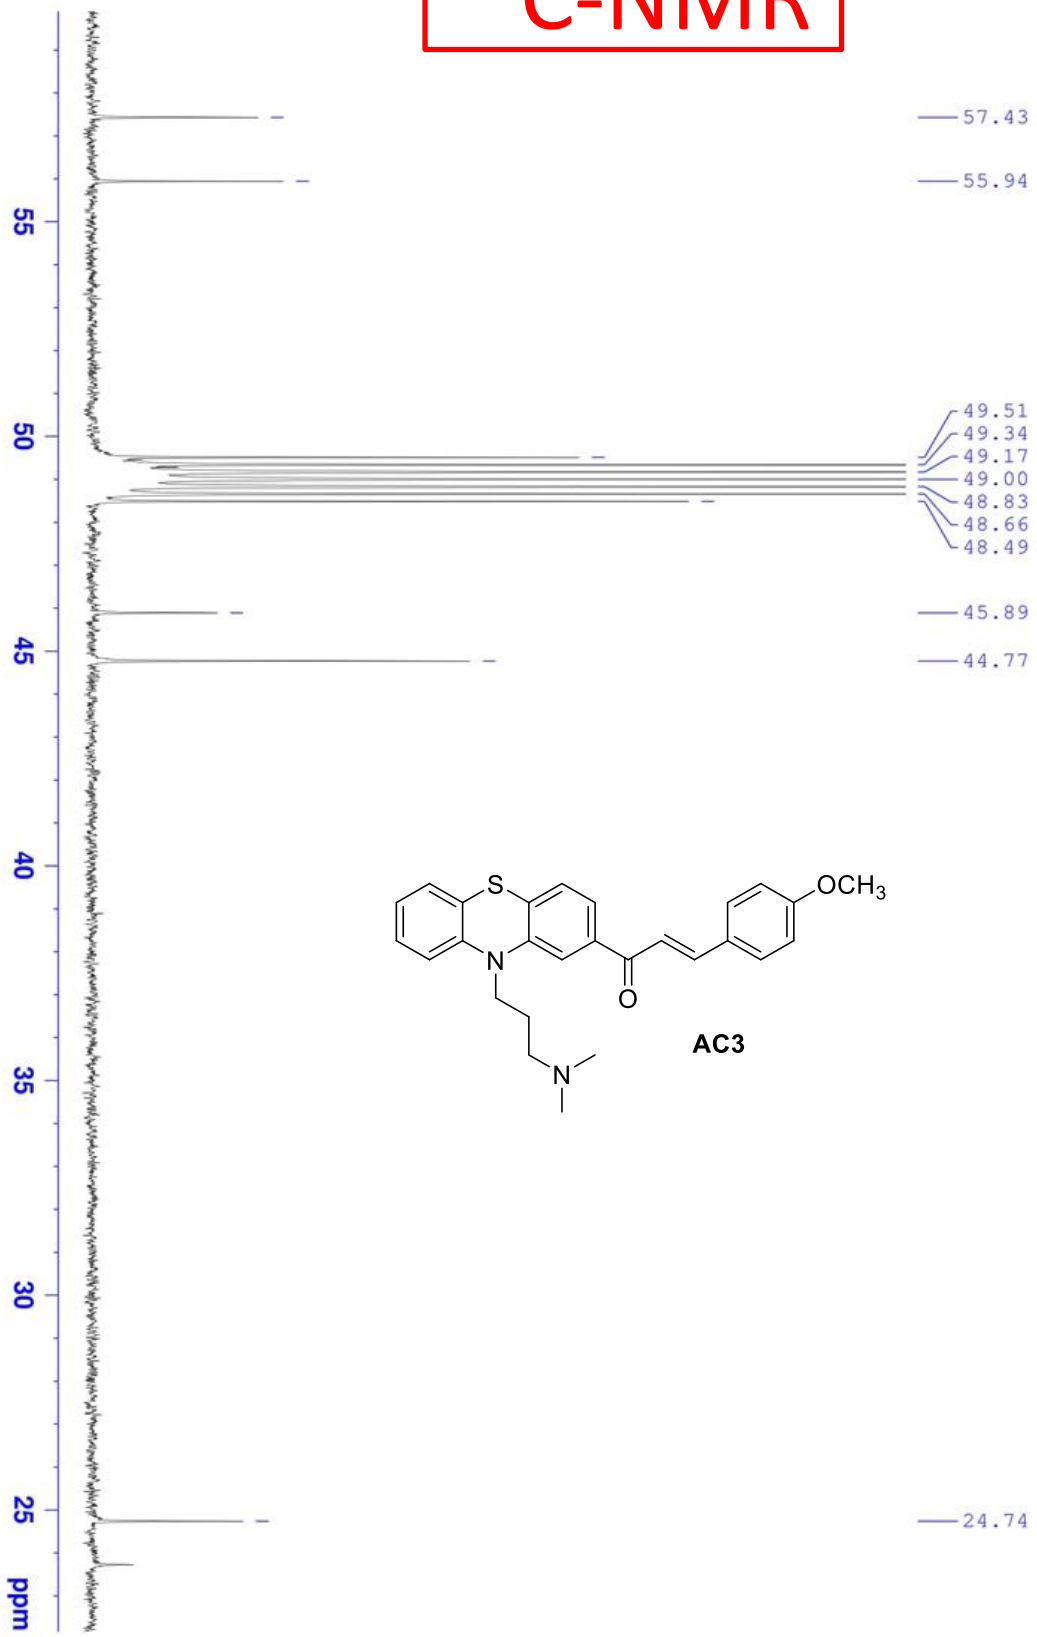

**CD-MeOD-Cl3CPD**

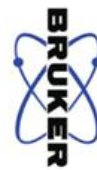

IR

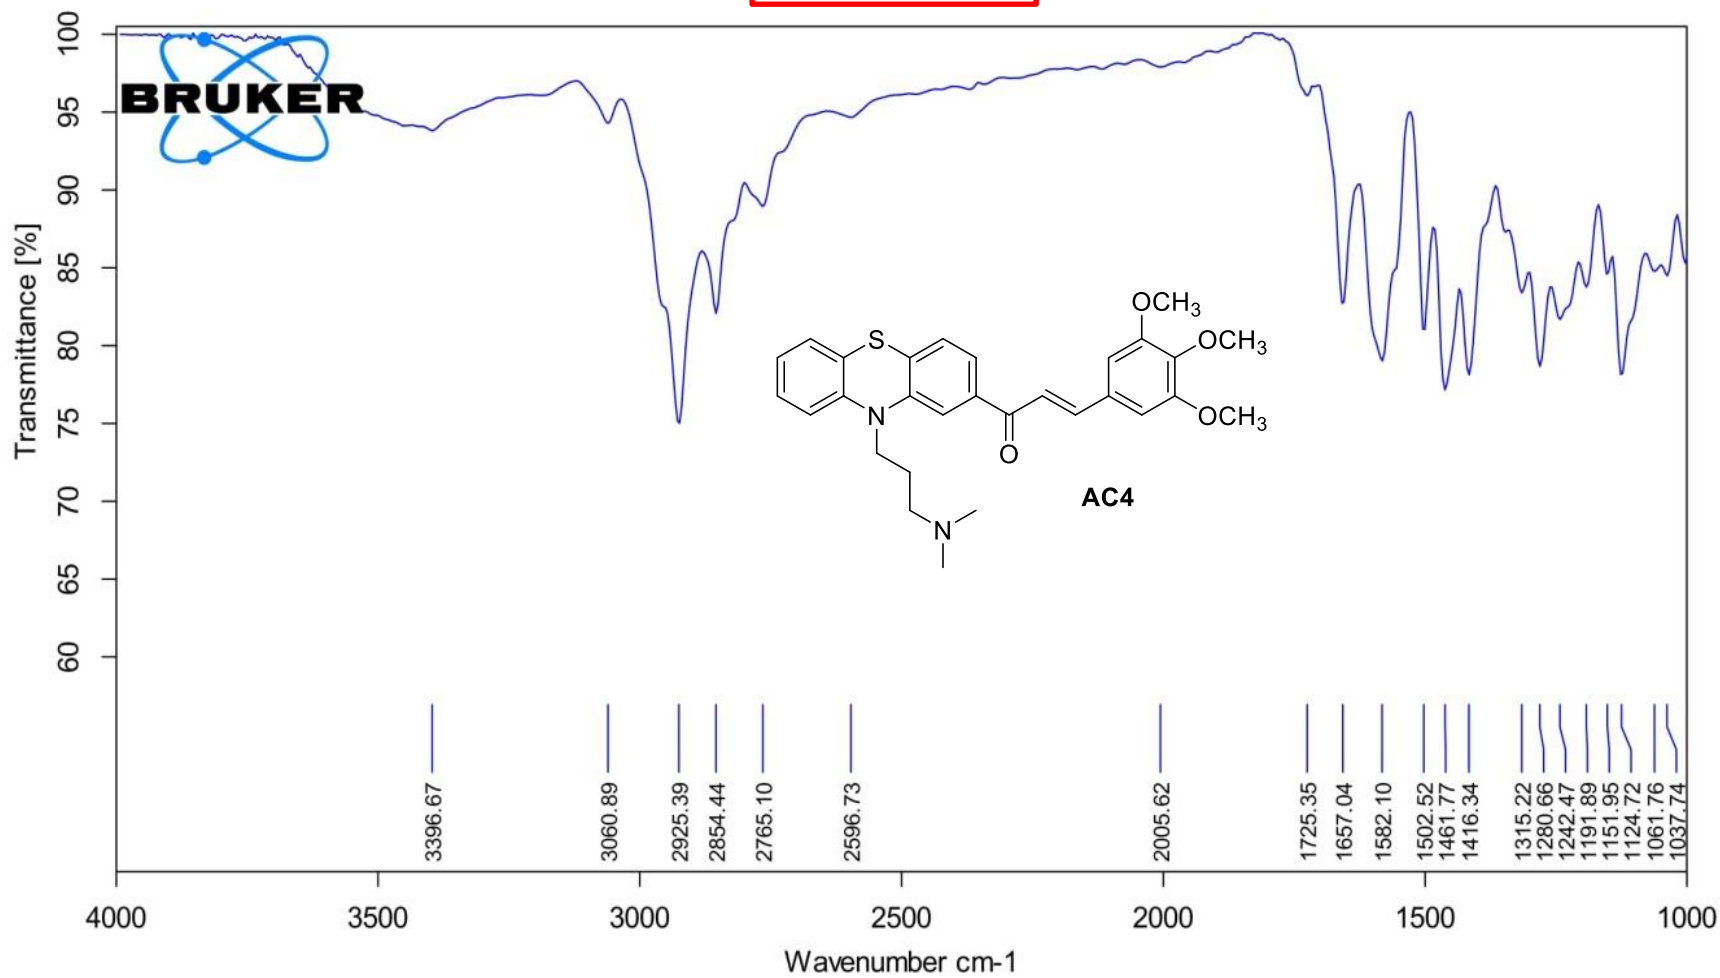

|                                      |    |                              |          |
|--------------------------------------|----|------------------------------|----------|
| E:\OPUS 7\2017\THANG 6\20170606\C4.0 | C4 | SENSOR 27 - BRUKER - GERMANY | 6/6/2017 |
|--------------------------------------|----|------------------------------|----------|

# MS

## Qualitative Analysis Report

|                               |                       |                       |                             |
|-------------------------------|-----------------------|-----------------------|-----------------------------|
| <b>Data Filename</b>          | 04-AC4.d              | <b>Sample Name</b>    | 04-AC4                      |
| <b>Sample Type</b>            | Sample                | <b>Position</b>       | P2-B5                       |
| <b>Instrument Name</b>        | Instrument 1          | <b>User Name</b>      |                             |
| <b>Acq Method</b>             | Cot ngan - MSMS_Pos.m | <b>Acquired Time</b>  | 22/08/2020 10:30:20 AM      |
| <b>IRM Calibration Status</b> | Success               | <b>DA Method</b>      | COTNGAN.M.m                 |
| <b>Comment</b>                |                       |                       |                             |
| <b>Sample Group</b>           |                       | <b>Info.</b>          |                             |
| <b>Stream Name</b>            | LC 1                  | <b>Acquisition SW</b> | 6200 series TOF/6500 series |
|                               |                       | <b>Version</b>        | Q-TOF B.06.01 (B6172 SP1)   |

### User Chromatograms

Fragmentor Voltage 140 Collision Energy 0 Ionization Mode ESI

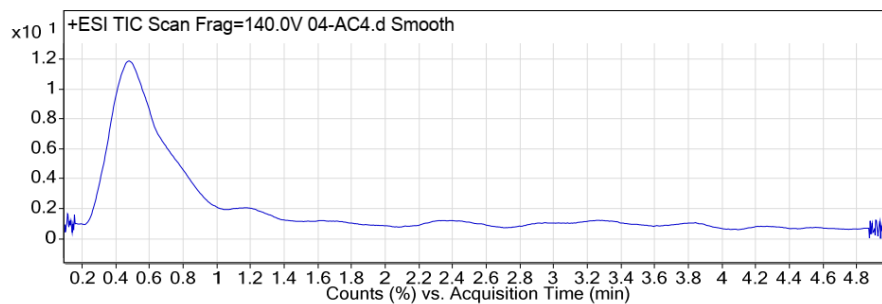

### User Spectra

Fragmentor Voltage 140 Collision Energy 0 Ionization Mode ESI

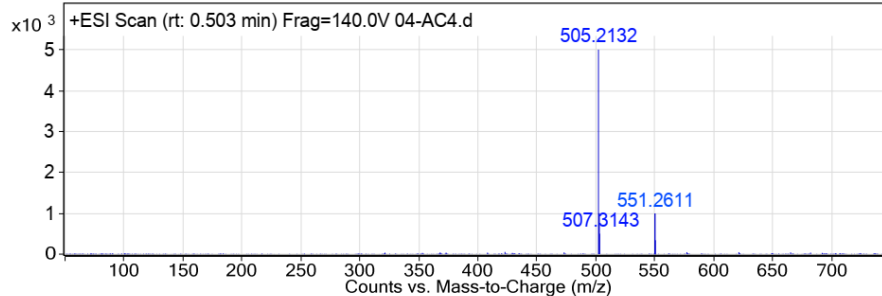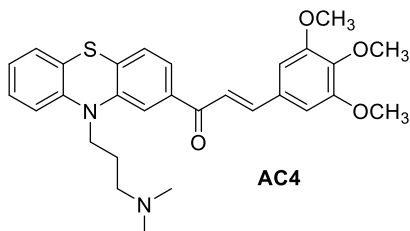

--- End Of Report ---



# MS

|               |          |             |                      |                 |              |                        |                        |
|---------------|----------|-------------|----------------------|-----------------|--------------|------------------------|------------------------|
| Sample Name   | 04-AC4   | Position    | P2-B5                | Instrument Name | Instrument 1 | User Name              |                        |
| Inj Vol       | 2        | InjPosition |                      | SampleType      | Sample       | IRM Calibration Status | Success                |
| Data Filename | 04-AC4.d | ACQ Method  | Cot ngan - MSMS_Pos. | Comment         |              | Acquired Time          | 22/08/2020 10:30:20 AM |

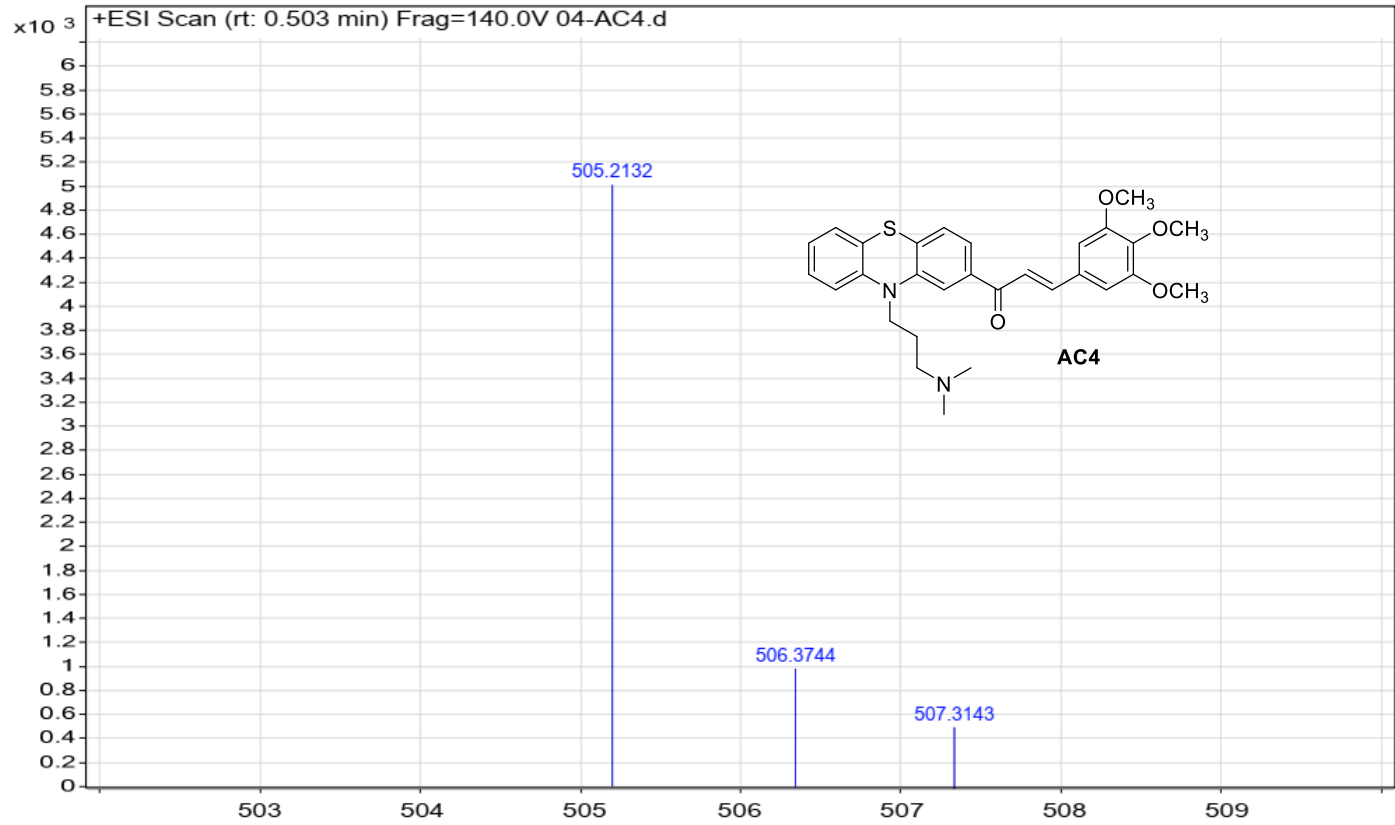

# <sup>1</sup>H-NMR

C4-MeOD-1H

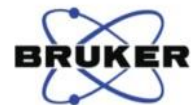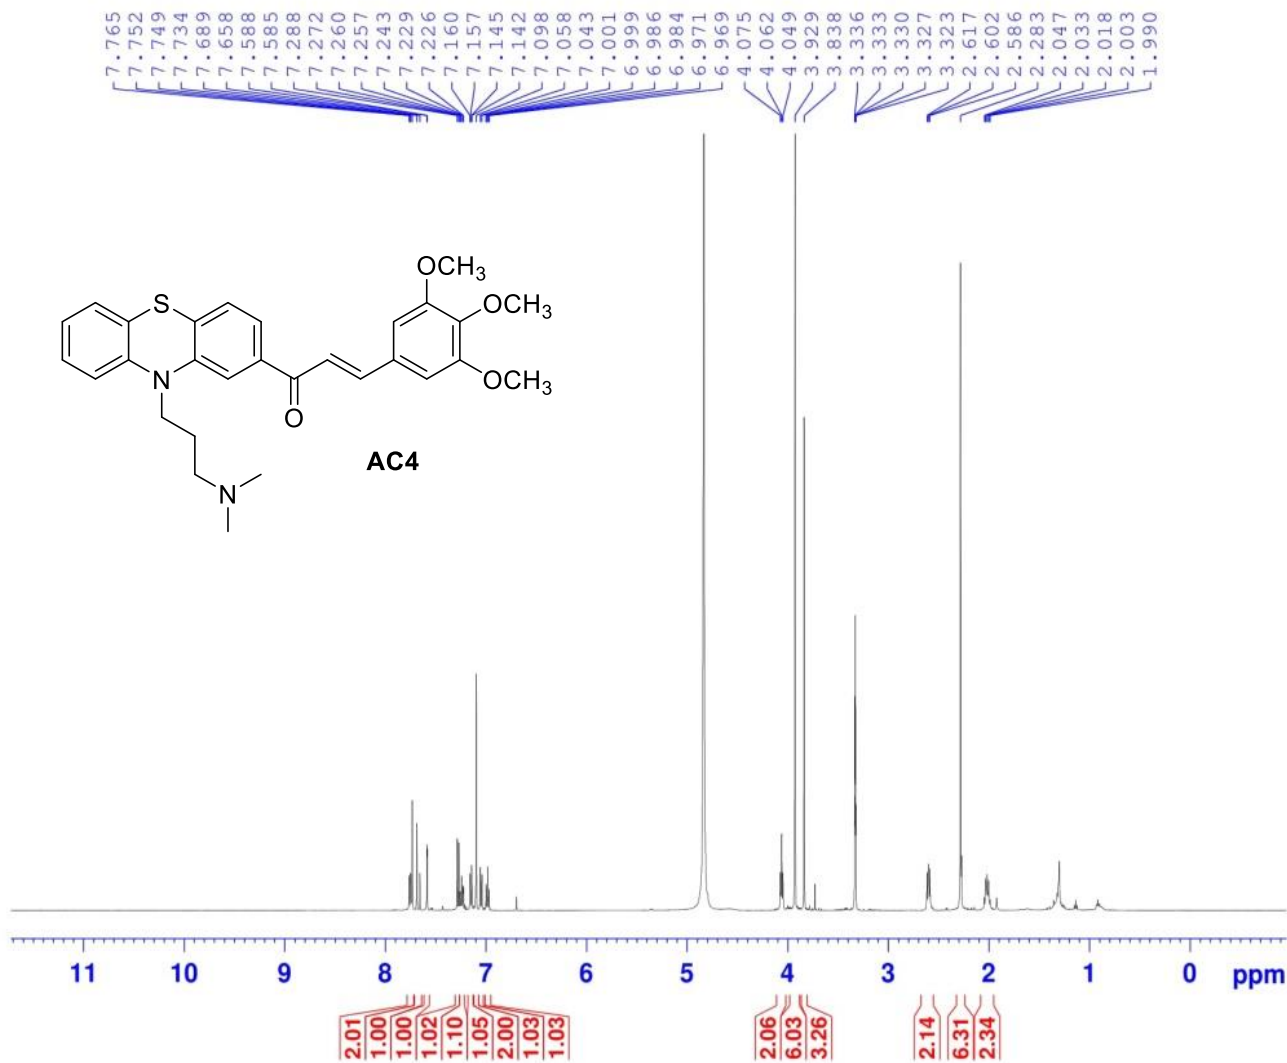

Current Data Parameters  
NAME 113D\_C4  
EXPNO 1  
PROCNO 1

F2 - Acquisition Parameters  
Date\_ 20170606  
Time 16.07  
INSTRUM spect  
PROBHD 5 mm PABBO BB/  
PULPROG zg30  
TD 65536  
SOLVENT MeOD  
NS 16  
DS 2  
SWH 10000.000 Hz  
FIDRES 0.152588 Hz  
AQ 3.2767999 sec  
RG 127.68  
DW 50.000 usec  
DE 6.50 usec  
TE 303.0 K  
D1 1.00000000 sec  
TD0 1

==== CHANNEL f1 =====  
SFO1 500.2030889 MHz  
NUC1 1H  
P1 10.00 usec  
PLW1 22.00000000 W

F2 - Processing parameters  
SI 65536  
SF 500.2000001 MHz  
WDW EM  
SSB 0  
LB 0.30 Hz  
GB 0  
PC 1.00

# <sup>1</sup>H-NMR

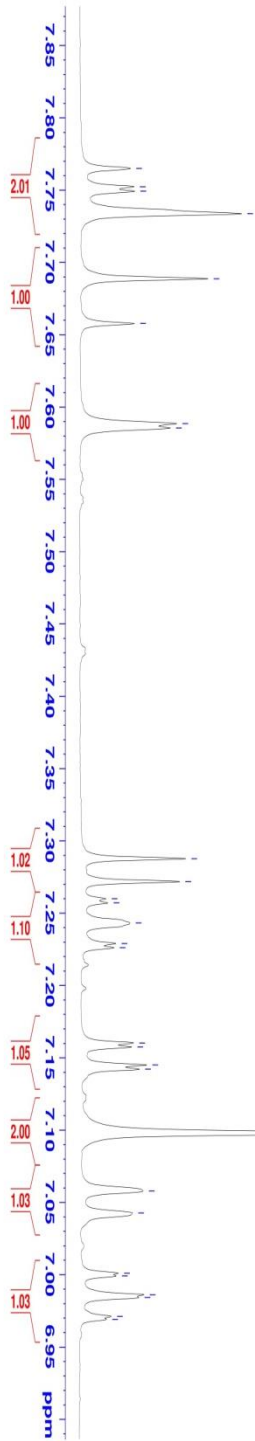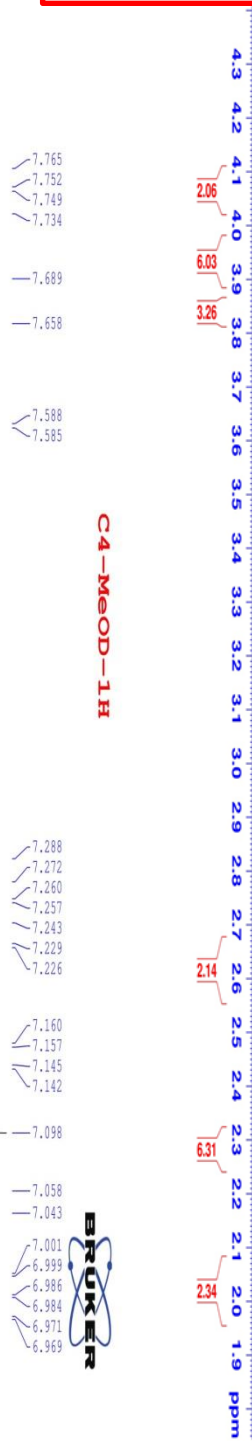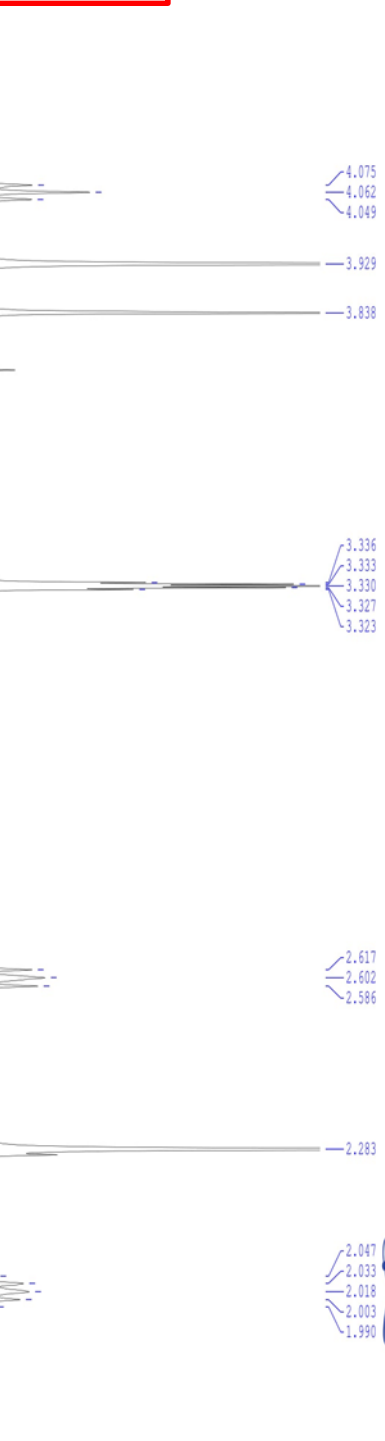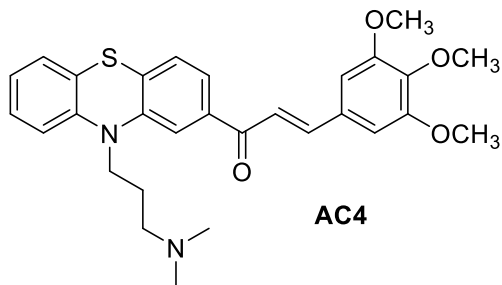

# $^{13}\text{C}$ -NMR

C4-MeOD-C13CPD

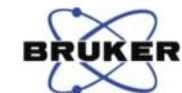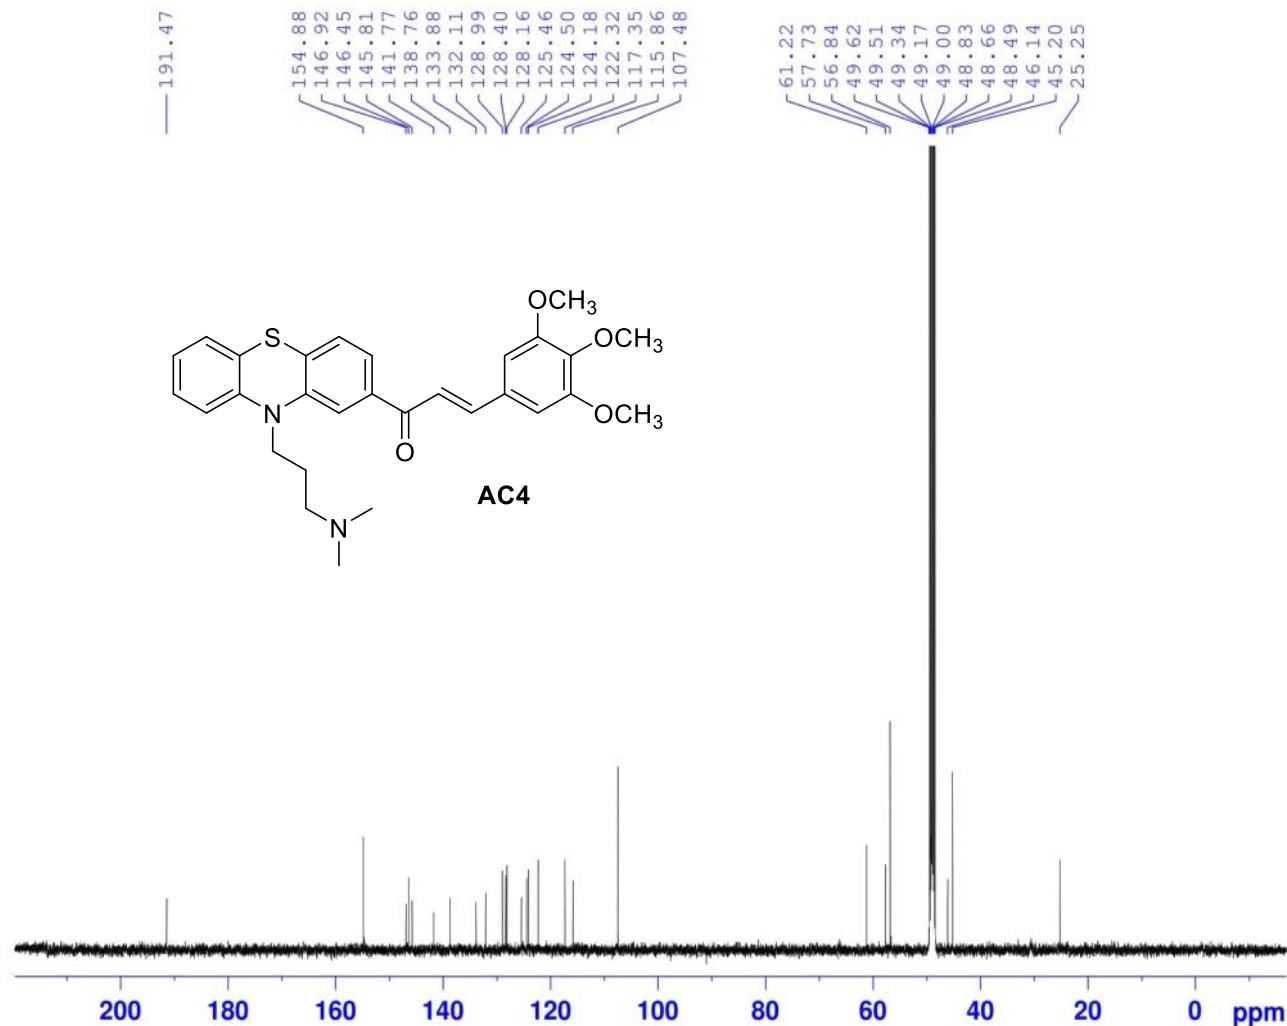

Current Data Parameters  
NAME 113D\_C4  
EXPNO 2  
PROCNO 1

F2 - Acquisition Parameters  
Date\_ 20170606  
Time 19.38  
INSTRUM spect  
PROBHD 5 mm PABBO BB/  
PULPROG zgpg30  
TD 65536  
SOLVENT MeOD  
NS 2048  
DS 4  
SWH 29761.904 Hz  
FIDRES 0.454131 Hz  
AQ 1.1010048 sec  
RG 198.57  
DW 16.800 usec  
DE 6.50 usec  
TE 303.0 K  
D1 2.00000000 sec  
D11 0.03000000 sec  
TD0 1

----- CHANNEL f1 -----  
SFO1 125.7879670 MHz  
NUC1 13C  
P1 10.00 usec  
PLW1 88.00000000 W

----- CHANNEL f2 -----  
SFO2 500.2020008 MHz  
NUC2 1H  
CPDPRG[2] waltz16  
PCPD2 80.00 usec  
PLW2 22.00000000 W  
PLW12 0.34375000 W  
PLW13 0.22000000 W

F2 - Processing parameters  
SI 32768  
SF 125.7752144 MHz  
WDW EM  
SSB 0  
LB 1.00 Hz  
GB 0  
PC 1.40

# $^{13}\text{C}$ -NMR

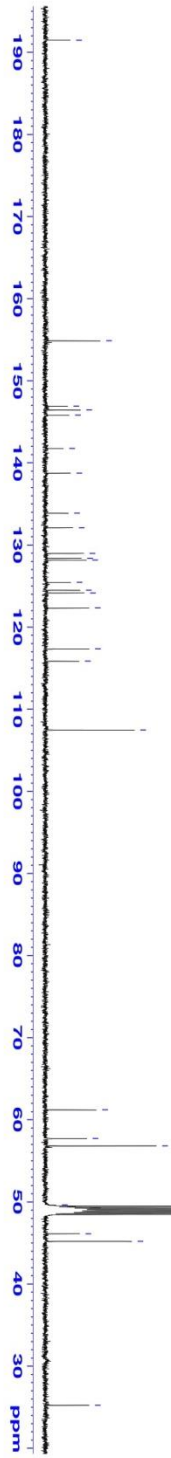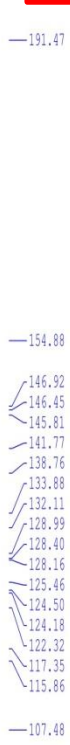

**C4-MeOD-C13CPD**

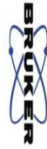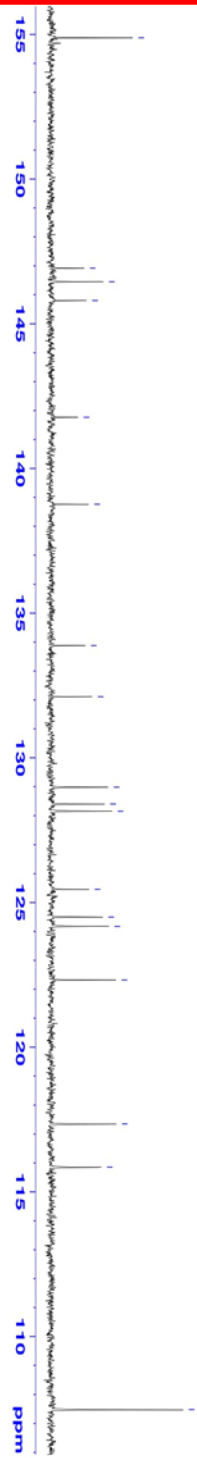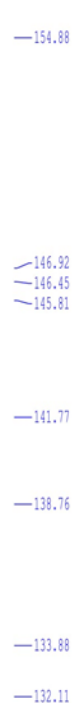

**C4-MeOD-C13CPD**

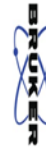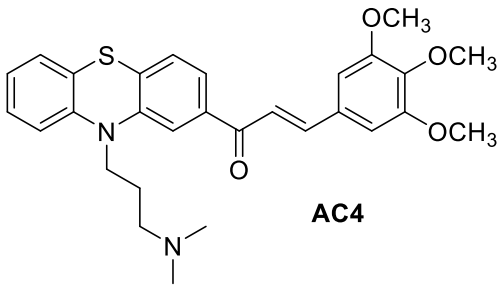

# $^{13}\text{C}$ -NMR

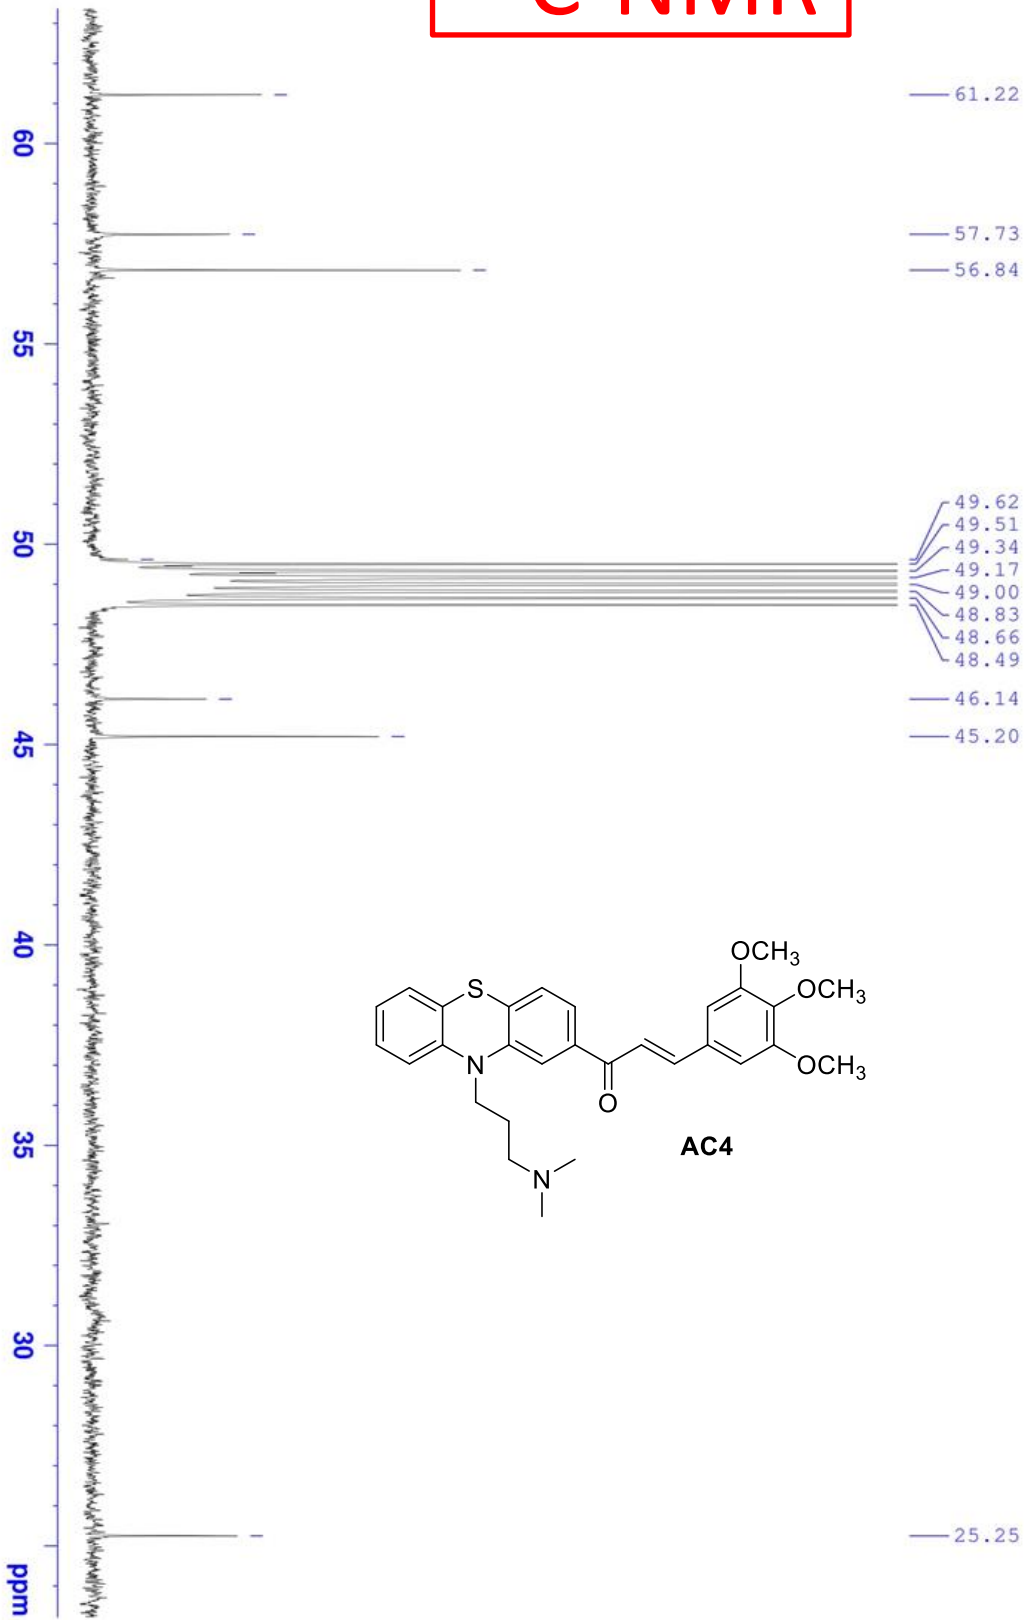

C4-MeOD-C13CPD

BRUKER

IR

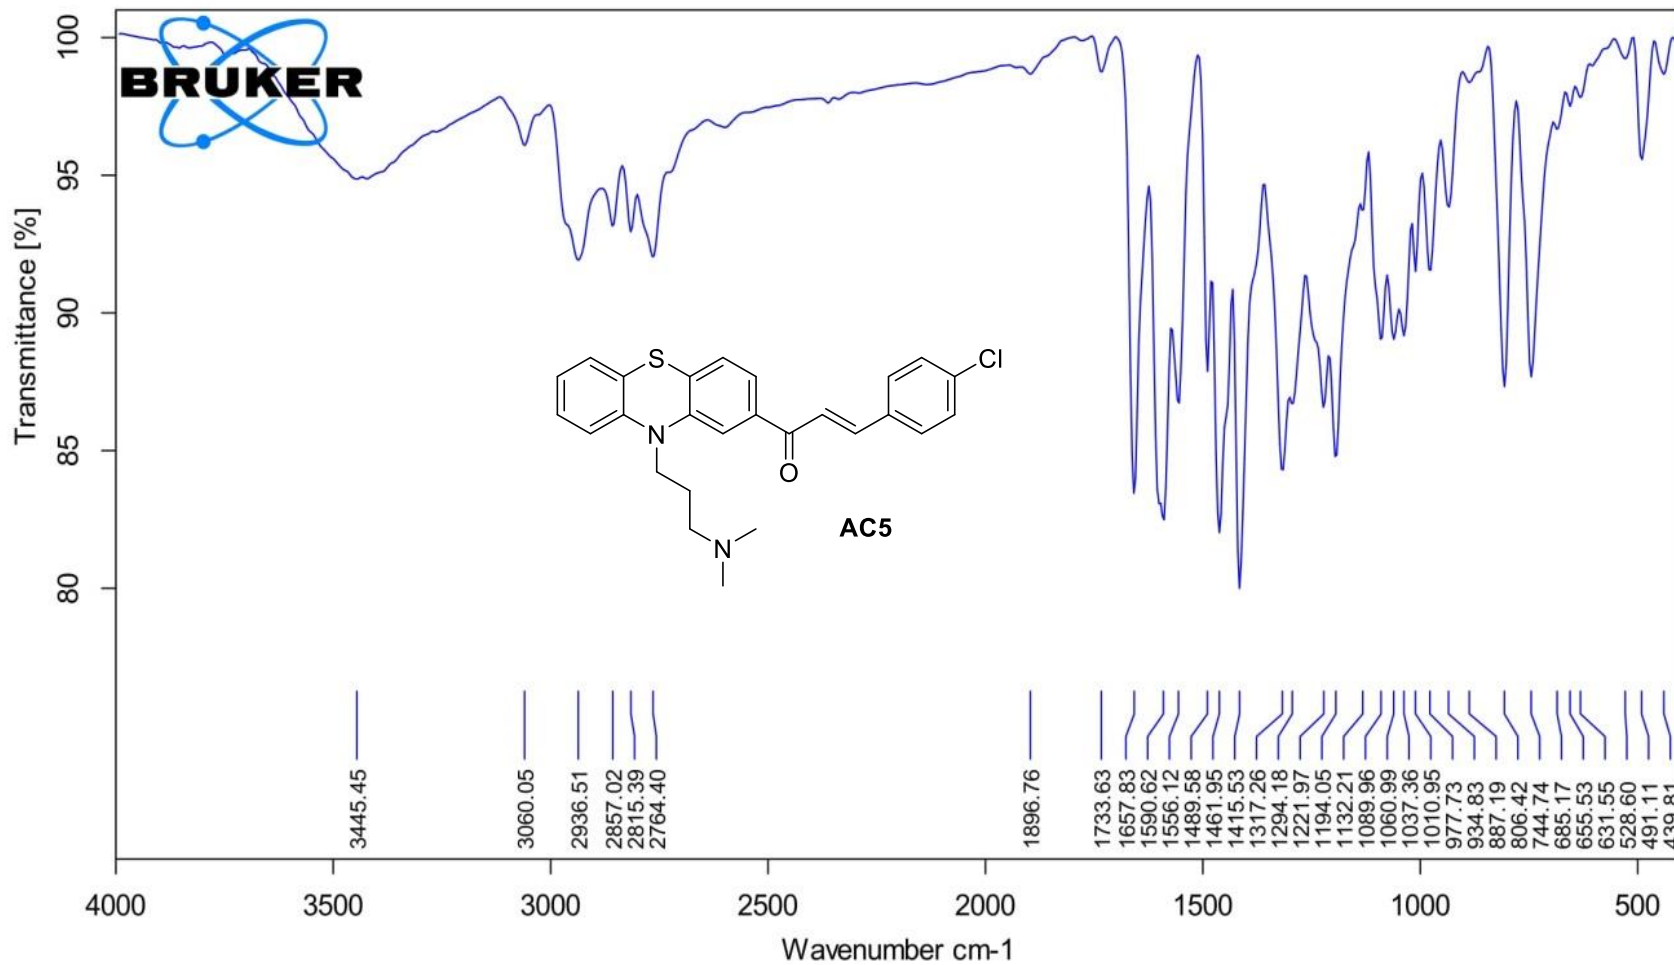

# MS

## Qualitative Analysis Report

|                               |                       |                       |                             |
|-------------------------------|-----------------------|-----------------------|-----------------------------|
| <b>Data Filename</b>          | 05-AC5.d              | <b>Sample Name</b>    | 05-AC5                      |
| <b>Sample Type</b>            | Sample                | <b>Position</b>       | P2-B4                       |
| <b>Instrument Name</b>        | Instrument 1          | <b>User Name</b>      |                             |
| <b>Acq Method</b>             | Cot ngan - MSMS_Pos.m | <b>Acquired Time</b>  | 22/08/2020 10:38:45 AM      |
| <b>IRM Calibration Status</b> | Success               | <b>DA Method</b>      | COTNGAN.M.m                 |
| <b>Comment</b>                |                       |                       |                             |
| <b>Sample Group</b>           |                       | <b>Info.</b>          |                             |
| <b>Stream Name</b>            | LC 1                  | <b>Acquisition SW</b> | 6200 series TOF/6500 series |
|                               |                       | <b>Version</b>        | Q-TOF B.06.01 (B6172 SP1)   |

### User Chromatograms

Fragmentor Voltage 140 Collision Energy 0 Ionization Mode ESI

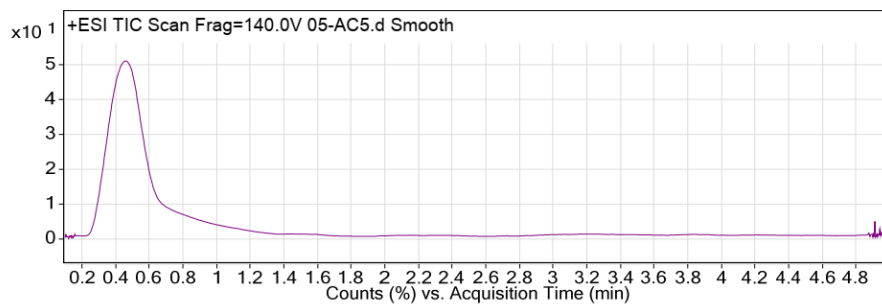

### User Spectra

Fragmentor Voltage 140 Collision Energy 0 Ionization Mode ESI

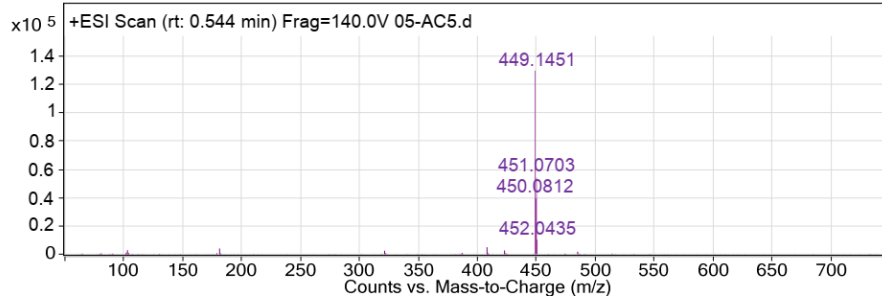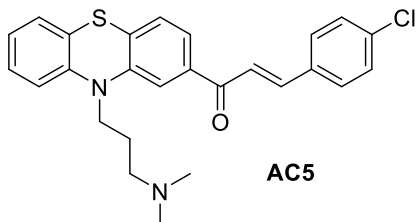

--- End Of Report ---



# MS

|               |          |             |                      |                 |              |                        |                        |
|---------------|----------|-------------|----------------------|-----------------|--------------|------------------------|------------------------|
| Sample Name   | 05-AC5   | Position    | P2-B4                | Instrument Name | Instrument 1 | User Name              |                        |
| Inj Vol       | 2        | InjPosition |                      | SampleType      | Sample       | IRM Calibration Status | Success                |
| Data Filename | 05-AC5.d | ACQ Method  | Cot ngan - MSMS_Pos. | Comment         |              | Acquired Time          | 22/08/2020 10:38:45 AM |

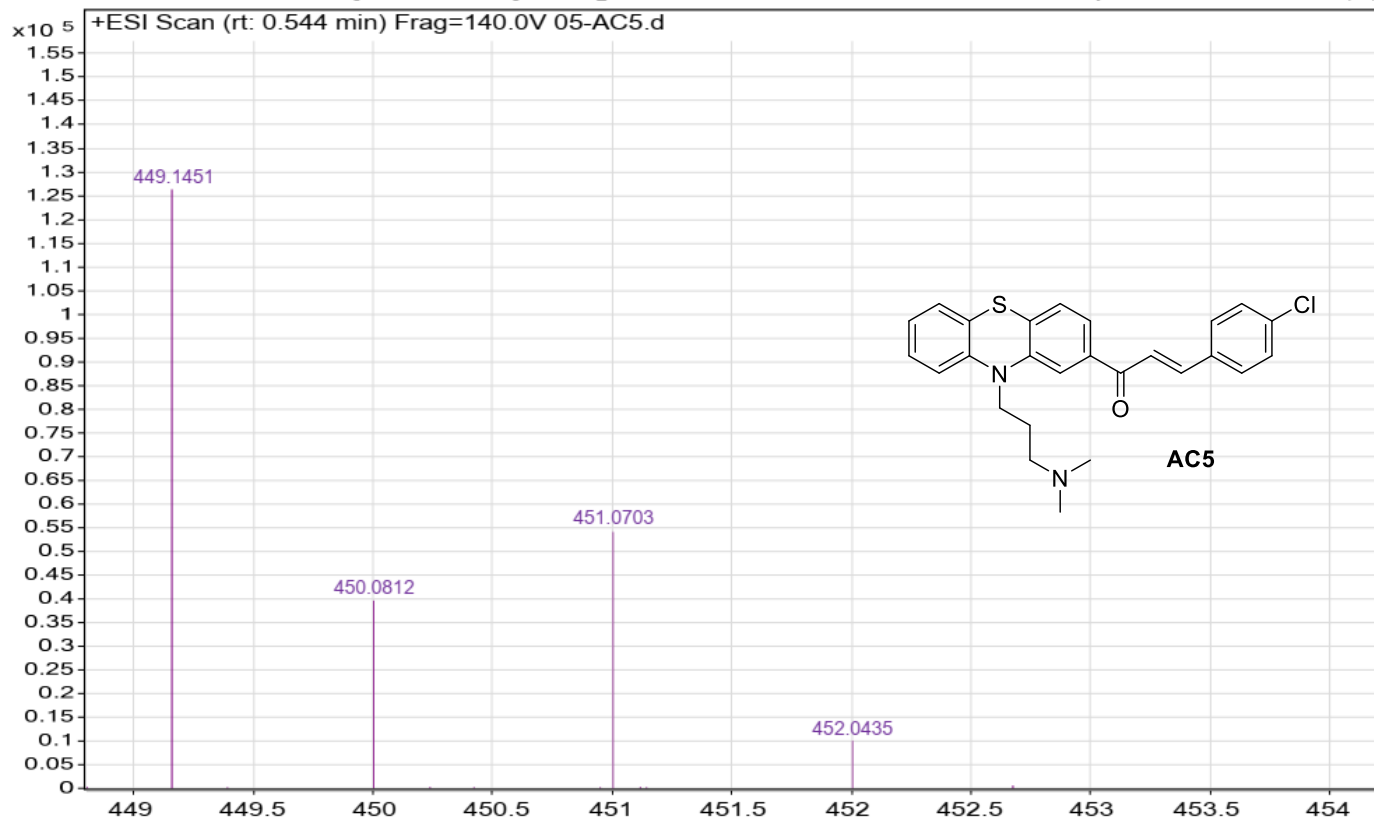

# <sup>1</sup>H-NMR

C9-MeOD-1H

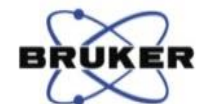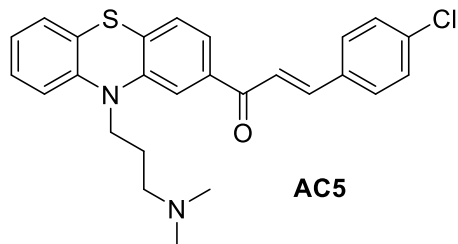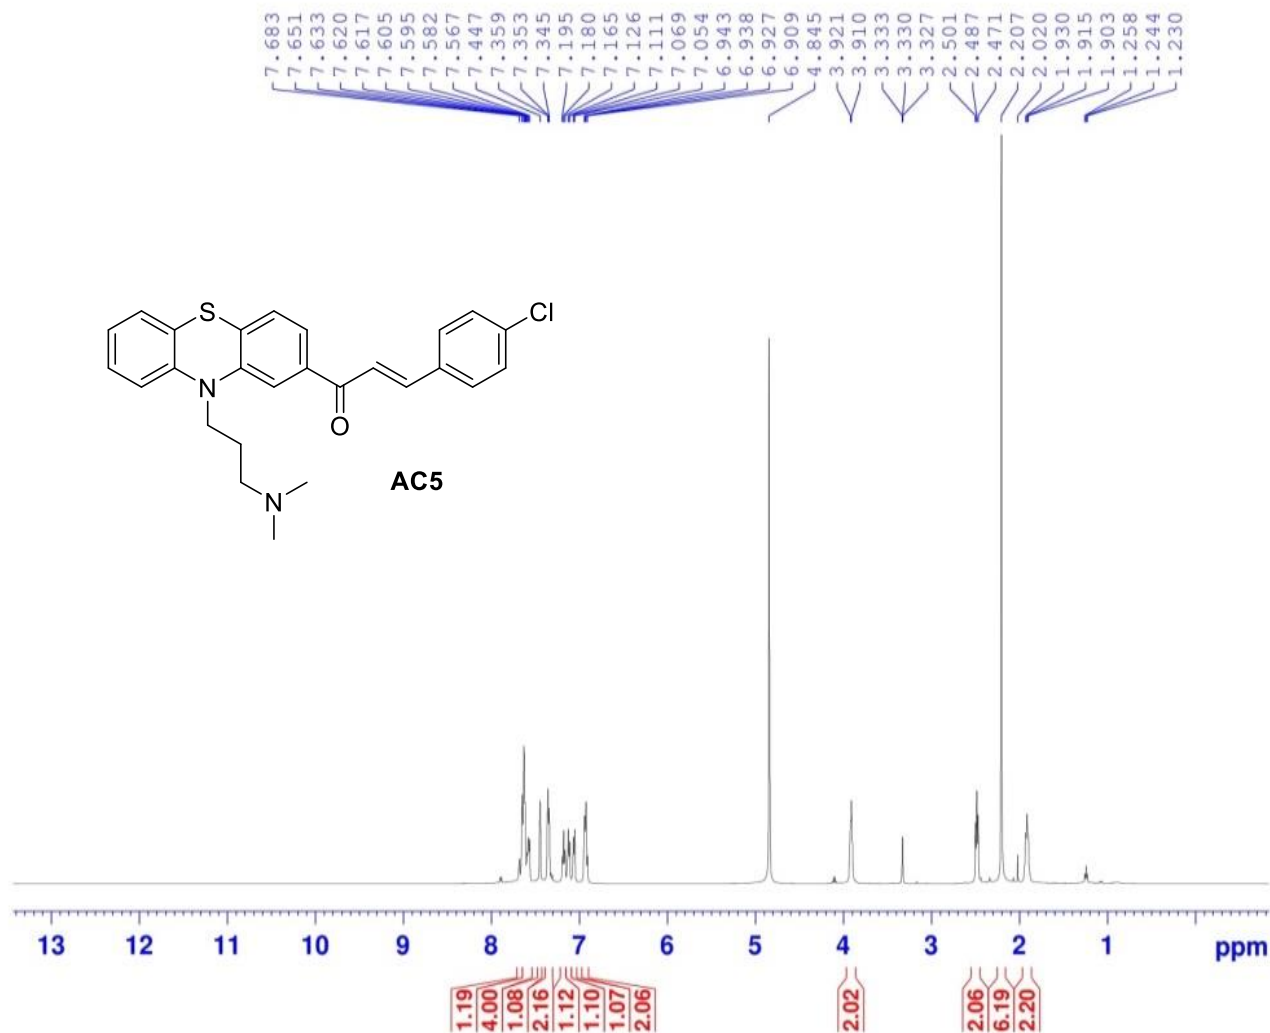

Current Data Parameters  
NAME 113DAO\_C9  
EXPNO 1  
PROCNO 1

F2 - Acquisition Parameters  
Date\_ 20170704  
Time 11.15  
INSTRUM spect  
PROBHD 5 mm PABBO BB/  
PULPROG zg30  
TD 65536  
SOLVENT MeOD  
NS 16  
DS 2  
SWH 10000.000 Hz  
FIDRES 0.152588 Hz  
AQ 3.2767999 sec  
RG 30.85  
DW 50.000 usec  
DE 6.50 usec  
TE 303.0 K  
D1 1.00000000 sec  
TD0 1

===== CHANNEL f1 =====  
SF01 500.2030889 MHz  
NUC1 1H  
P1 10.00 usec  
PLW1 22.00000000 W

F2 - Processing parameters  
SI 65536  
SF 500.2000013 MHz  
WDW EM  
SSB 0  
LB 0.30 Hz  
GB 0  
PC 1.00

# <sup>1</sup>H-NMR

C9-MeOD-1H

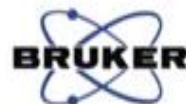

3.921  
3.910

3.333  
3.330  
3.327

2.501  
2.487  
2.471

2.207

2.020  
1.930  
1.915  
1.903

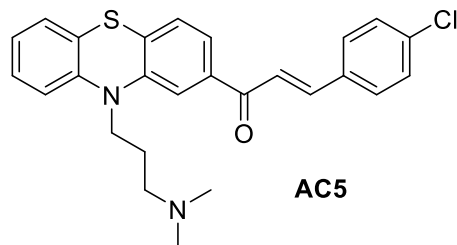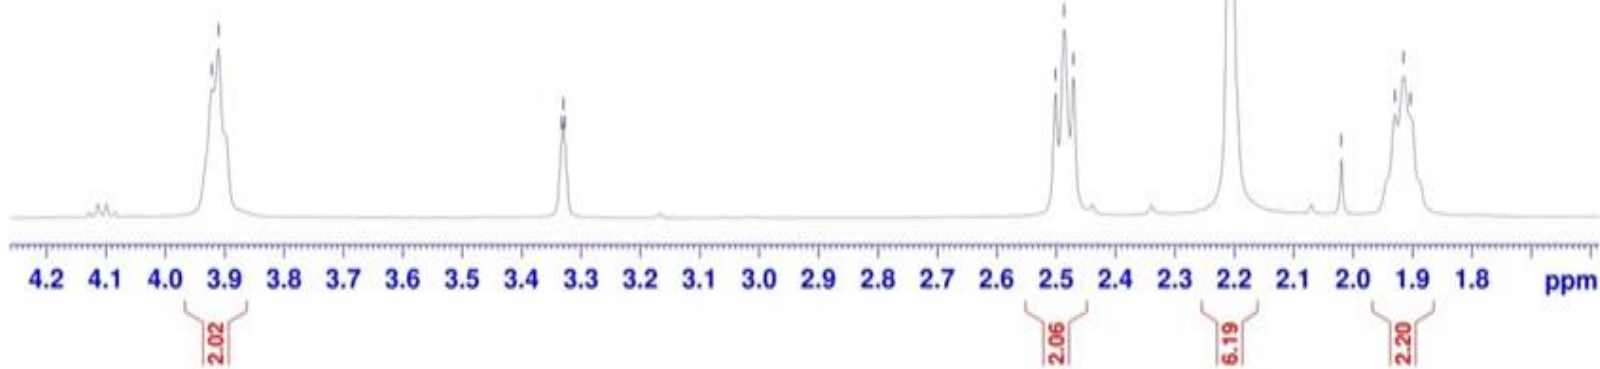

# <sup>1</sup>H-NMR

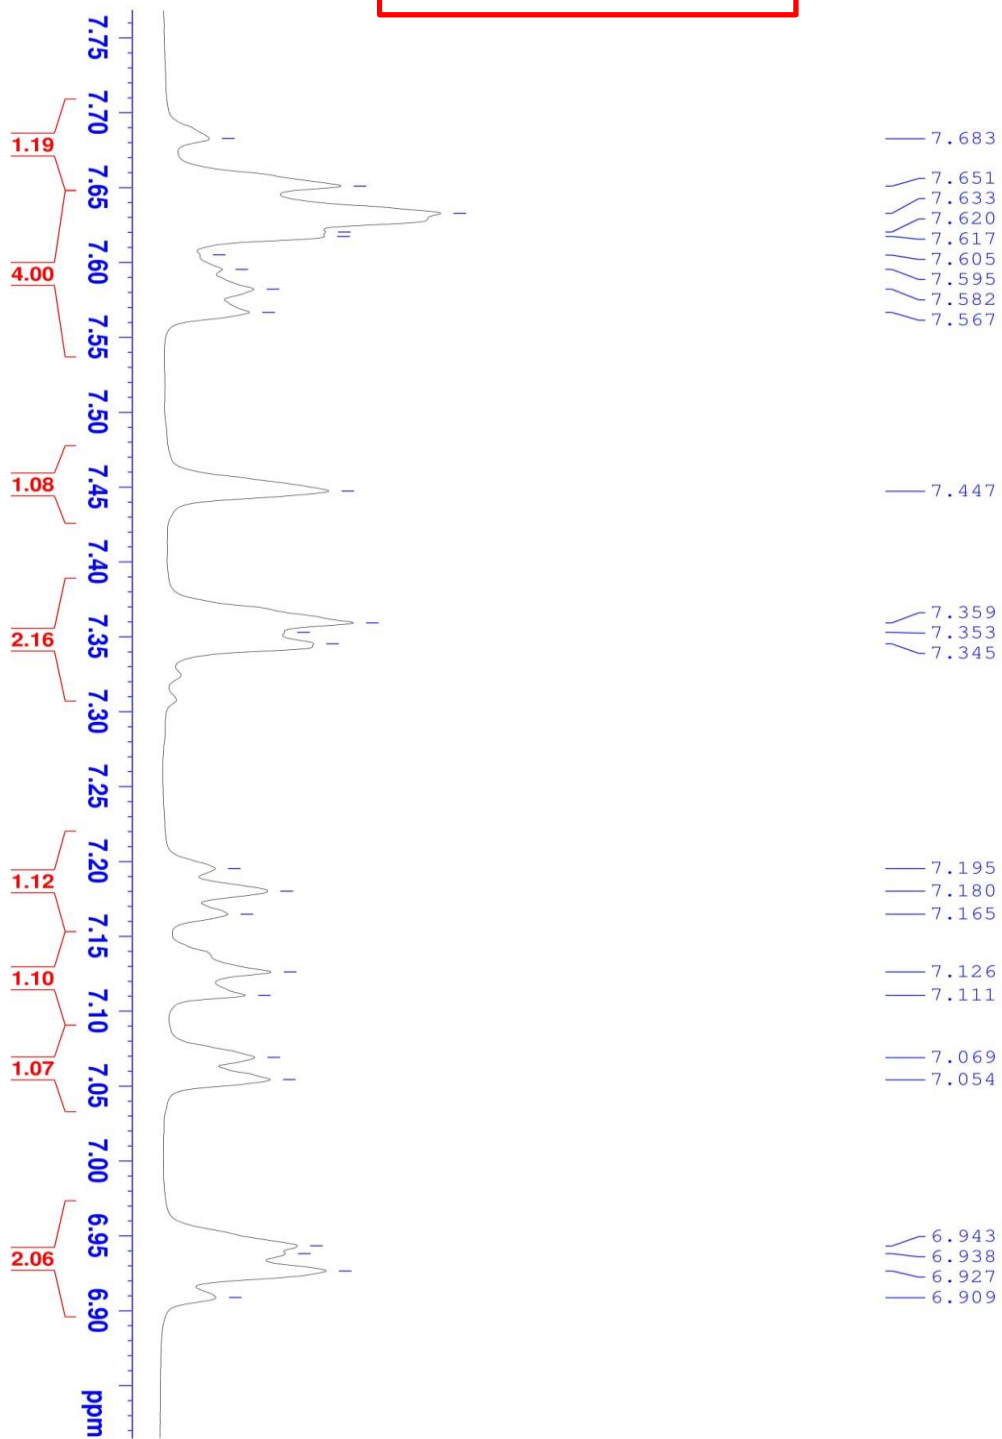

C9-MeOD-1H

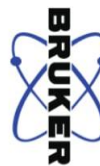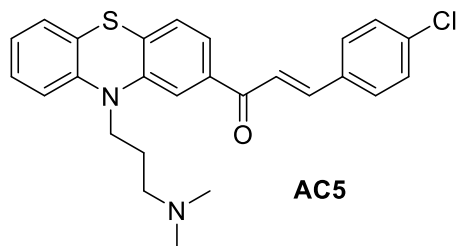

# <sup>13</sup>C-NMR

C9-MeOD-C13CPD

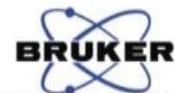

Current Data Parameters  
NAME 113DA0\_C9  
EXPNO 2  
PROCNO 1

F2 - Acquisition Parameters  
Date\_ 20170704  
Time 16.32  
INSTRUM spect  
PROBHD 5 mm PABBO BB/  
PULPROG zgpg30  
TD 65536  
SOLVENT MeOD  
NS 128  
DS 4  
SWH 29761.904 Hz  
FIDRES 0.454131 Hz  
AQ 1.1010048 sec  
RG 198.57  
DW 16.800 usec  
DE 6.50 usec  
TE 303.0 K  
D1 2.00000000 sec  
D11 0.03000000 sec  
TD0 1

----- CHANNEL f1 -----  
SFO1 125.7879670 MHz  
NUC1 13C  
P1 10.00 usec  
PLW1 88.00000000 W

----- CHANNEL f2 -----  
SFO2 500.2020008 MHz  
NUC2 1H  
CPDPRG[2] waltz16  
PCPD2 80.00 usec  
PLW2 22.00000000 W  
PLW12 0.34375000 W  
PLW13 0.22000000 W

F2 - Processing parameters  
SI 32768  
SF 125.7752207 MHz  
WDW EM  
SSB 0  
LB 1.00 Hz  
GB 0  
PC 1.40

190.69

146.72  
145.49  
144.33  
138.35  
137.39  
134.92  
133.72  
131.92  
131.13  
130.19  
128.95  
128.82  
128.38  
128.14  
125.12  
124.35  
124.12  
123.42  
117.27  
115.68

57.65  
49.63  
49.51  
49.34  
49.17  
49.00  
48.83  
48.66  
48.49  
46.12  
45.24  
25.18

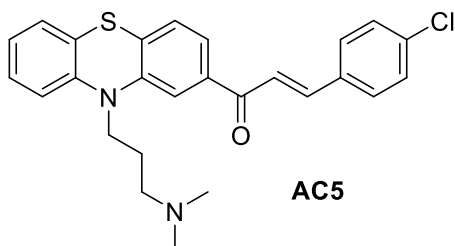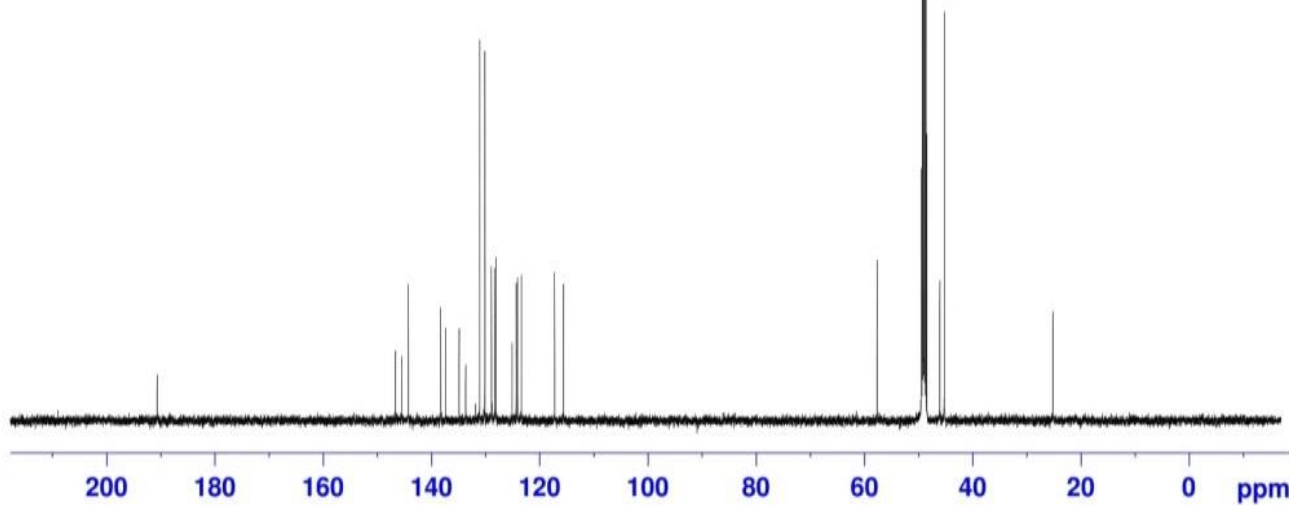

# $^{13}\text{C}$ -NMR

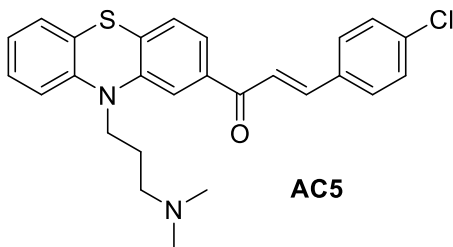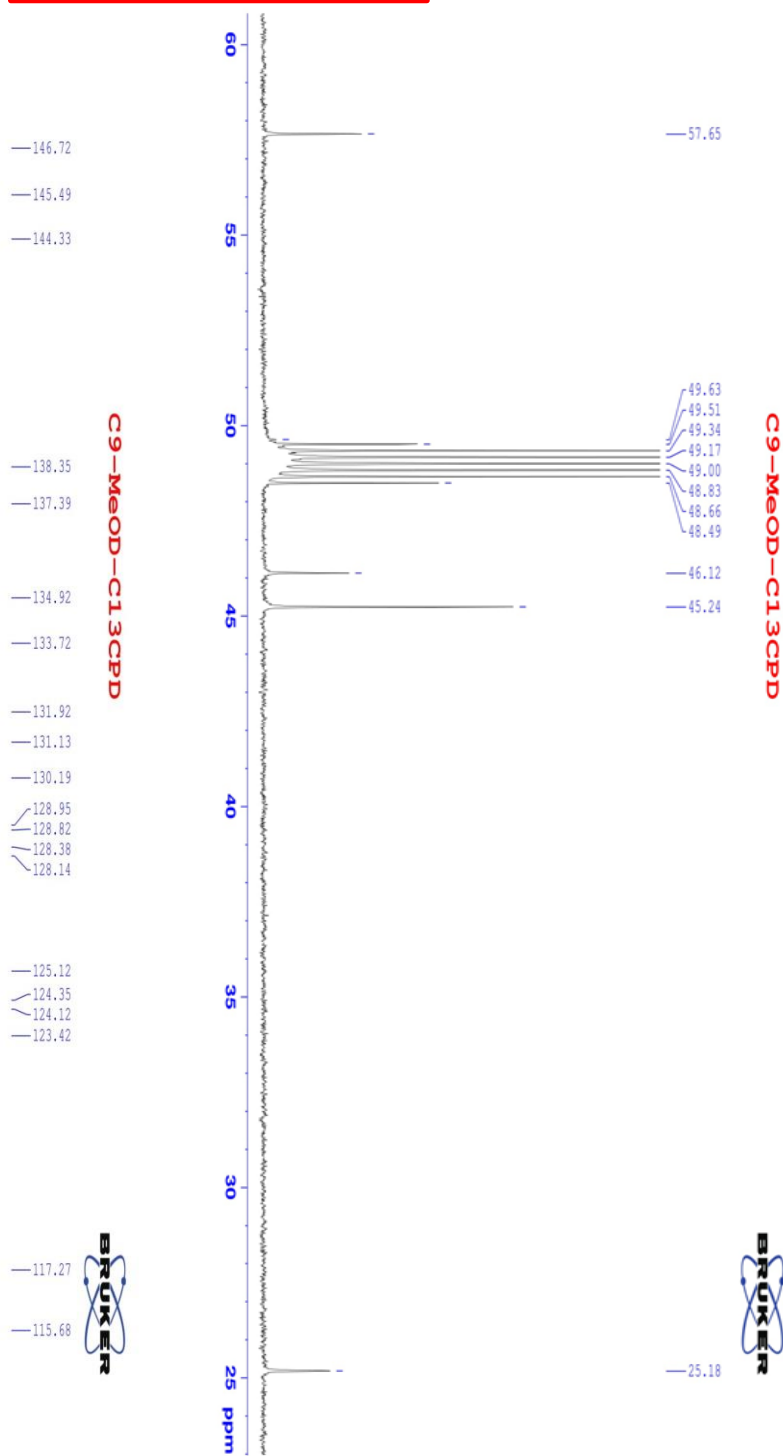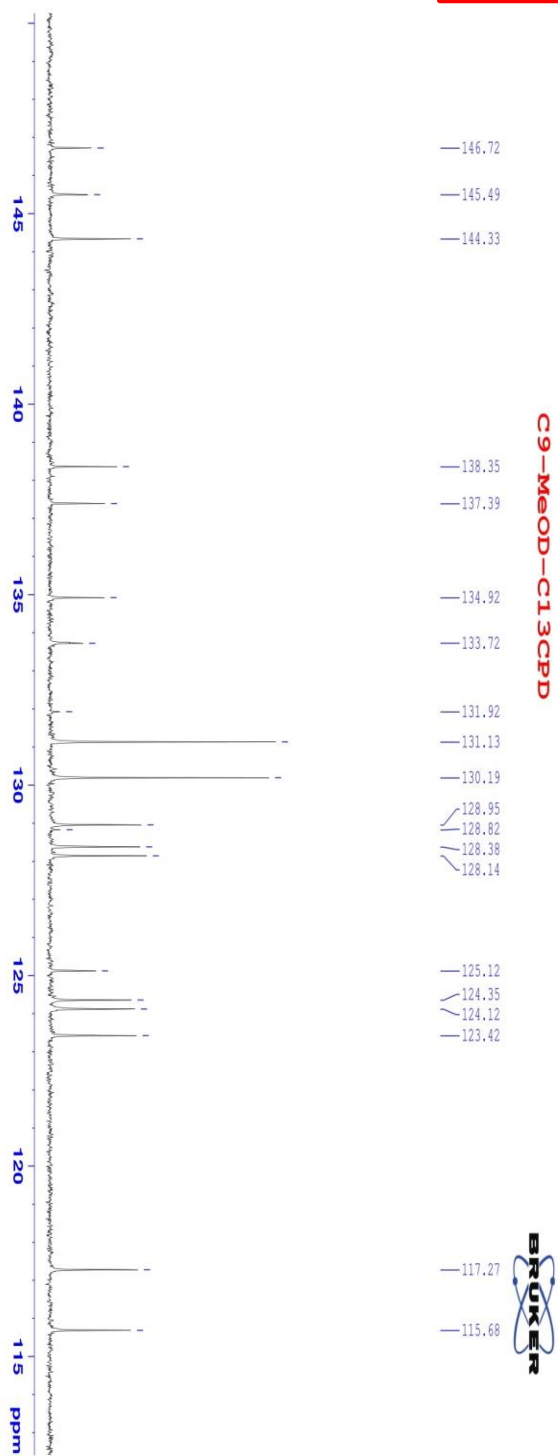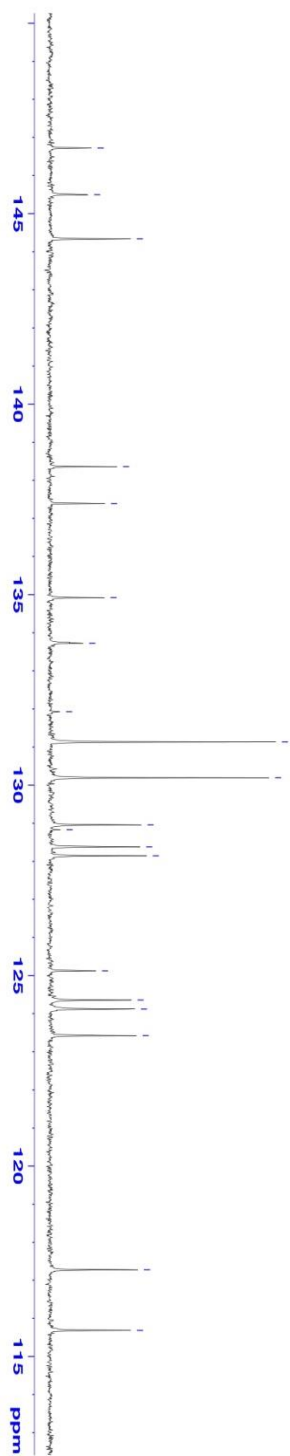

IR

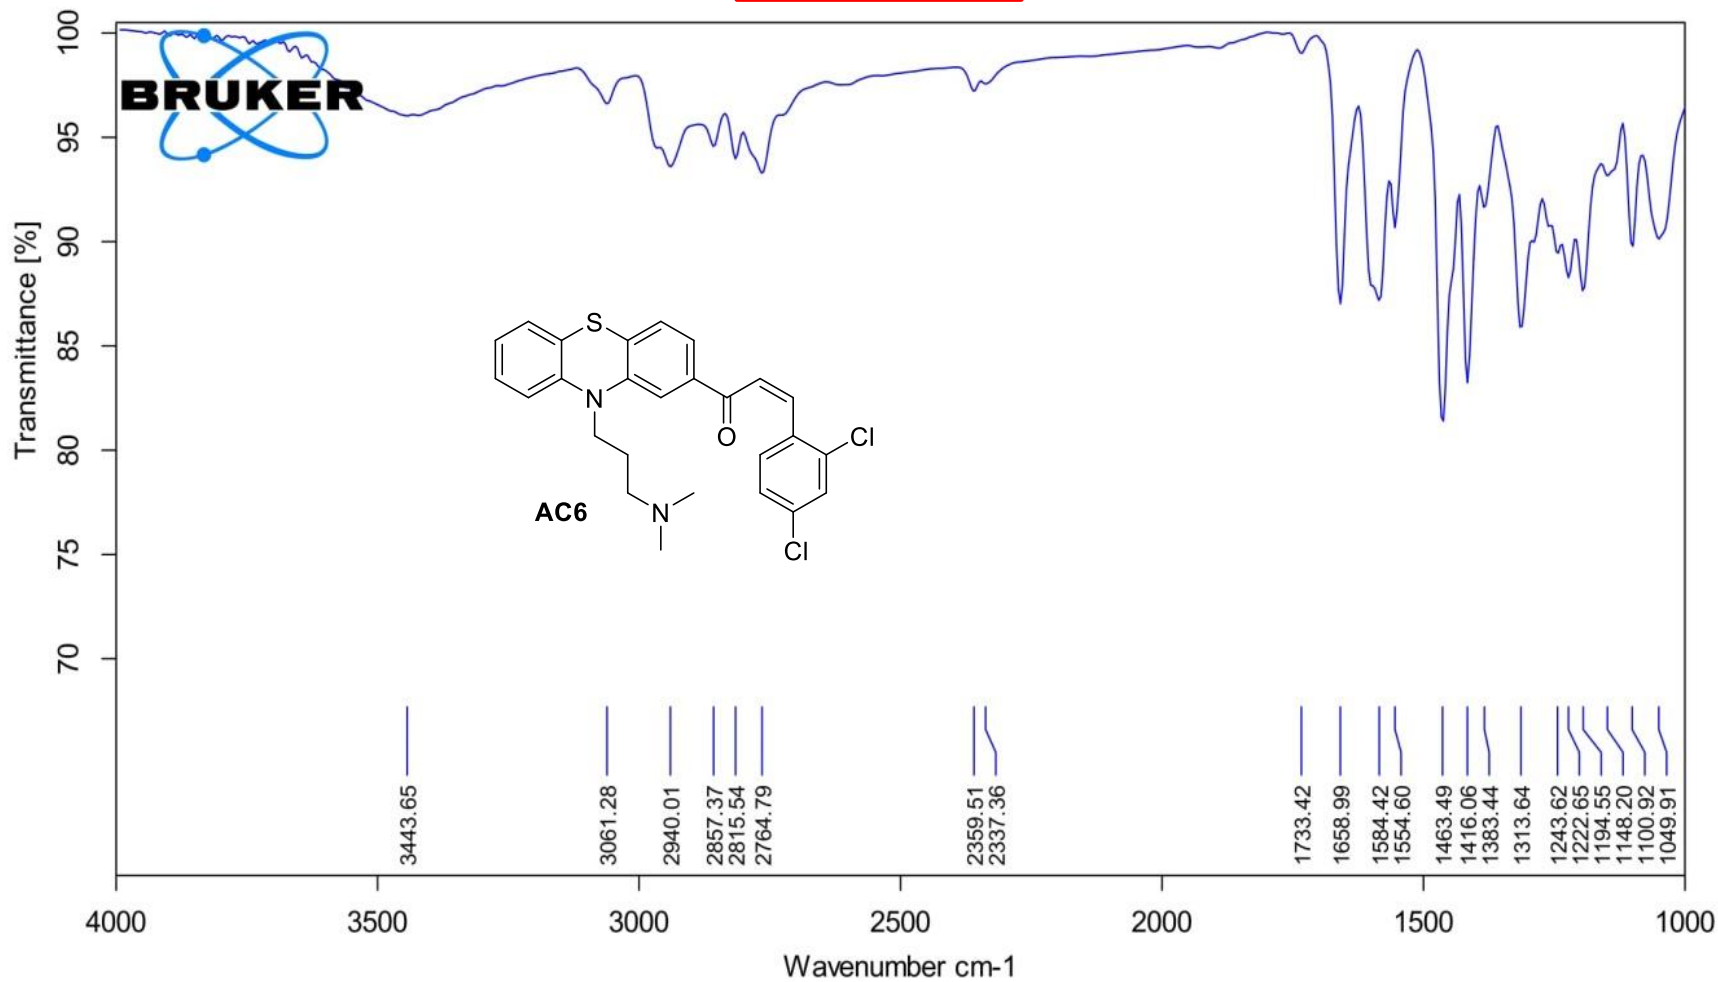

# MS

## Qualitative Analysis Report

|                               |                       |                       |                             |
|-------------------------------|-----------------------|-----------------------|-----------------------------|
| <b>Data Filename</b>          | 06-AC6.d              | <b>Sample Name</b>    | 06-AC6                      |
| <b>Sample Type</b>            | Sample                | <b>Position</b>       | P2-B3                       |
| <b>Instrument Name</b>        | Instrument 1          | <b>User Name</b>      |                             |
| <b>Acq Method</b>             | Cot ngan - MSMS_Pos.m | <b>Acquired Time</b>  | 22/08/2020 10:43:11 AM      |
| <b>IRM Calibration Status</b> | Success               | <b>DA Method</b>      | COTNGAN.M.m                 |
| <b>Comment</b>                |                       |                       |                             |
| <b>Sample Group</b>           |                       | <b>Info.</b>          |                             |
| <b>Stream Name</b>            | LC 1                  | <b>Acquisition SW</b> | 6200 series TOF/6500 series |
|                               |                       | <b>Version</b>        | Q-TOF B.06.01 (B6172 SP1)   |

### User Chromatograms

Fragmentor Voltage 140 Collision Energy 0 Ionization Mode ESI

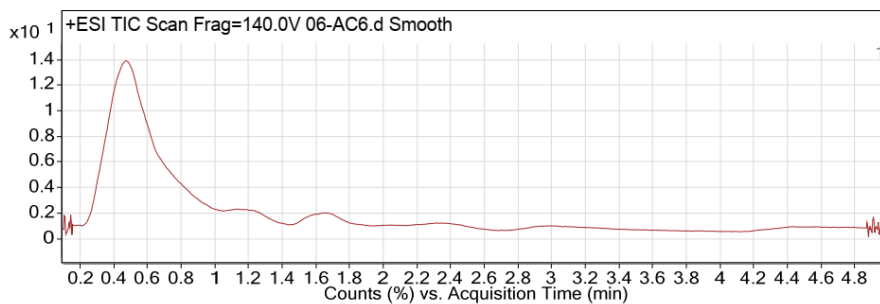

### User Spectra

Fragmentor Voltage 140 Collision Energy 0 Ionization Mode ESI

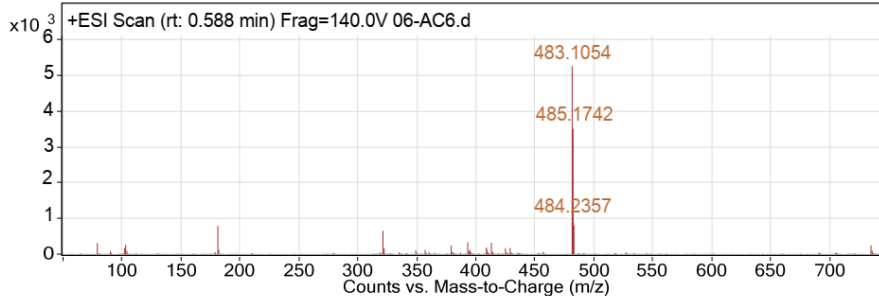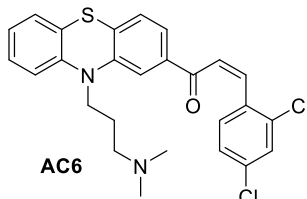

--- End Of Report ---



# MS

|               |          |             |                      |                 |              |                        |                        |
|---------------|----------|-------------|----------------------|-----------------|--------------|------------------------|------------------------|
| Sample Name   | 06-AC6   | Position    | P2-B3                | Instrument Name | Instrument 1 | User Name              |                        |
| Inj Vol       | 2        | InjPosition |                      | SampleType      | Sample       | IRM Calibration Status | Success                |
| Data Filename | 06-AC6.d | ACQ Method  | Cot ngan - MSMS_Pos. | Comment         |              | Acquired Time          | 22/08/2020 10:43:11 AM |

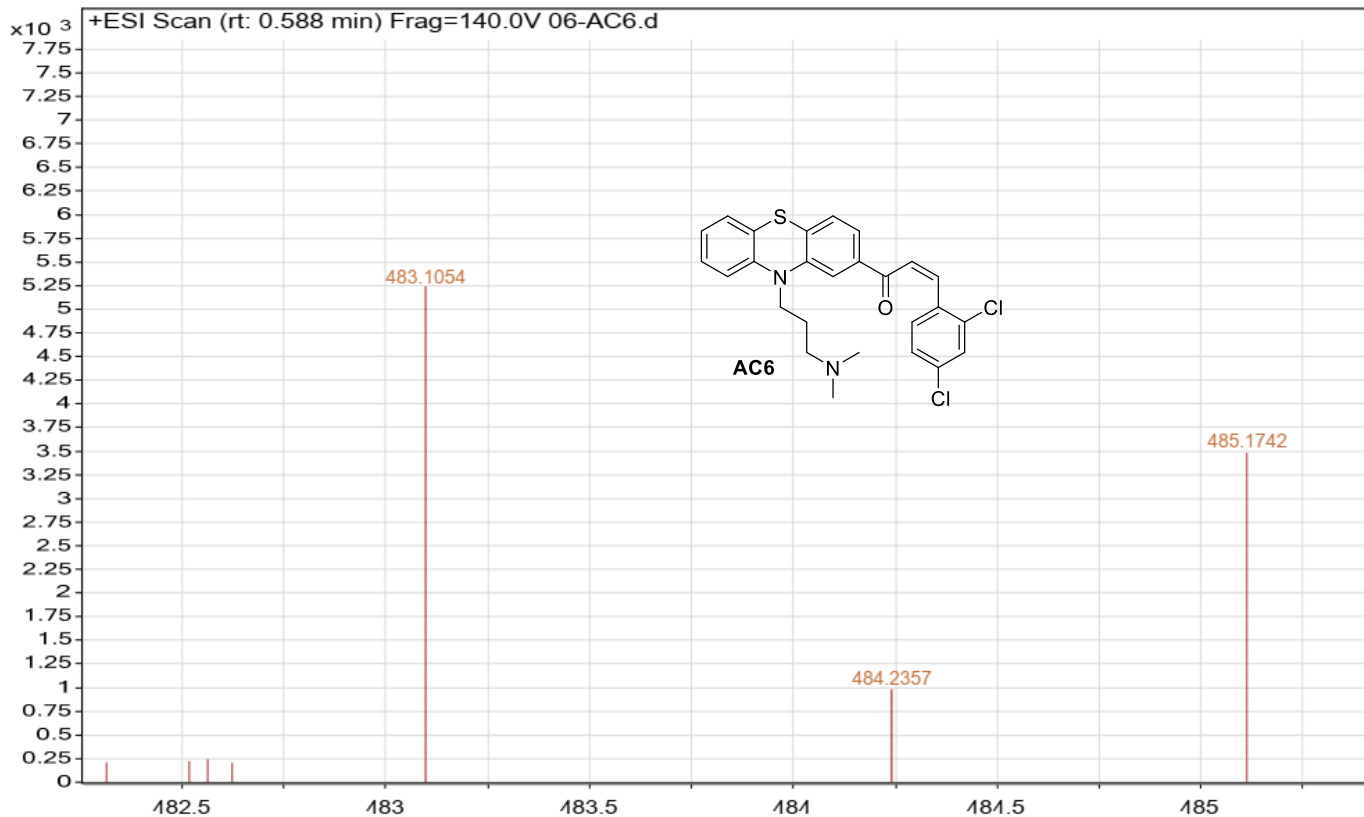

# <sup>1</sup>H-NMR

C8-DMSO-1H

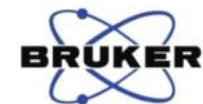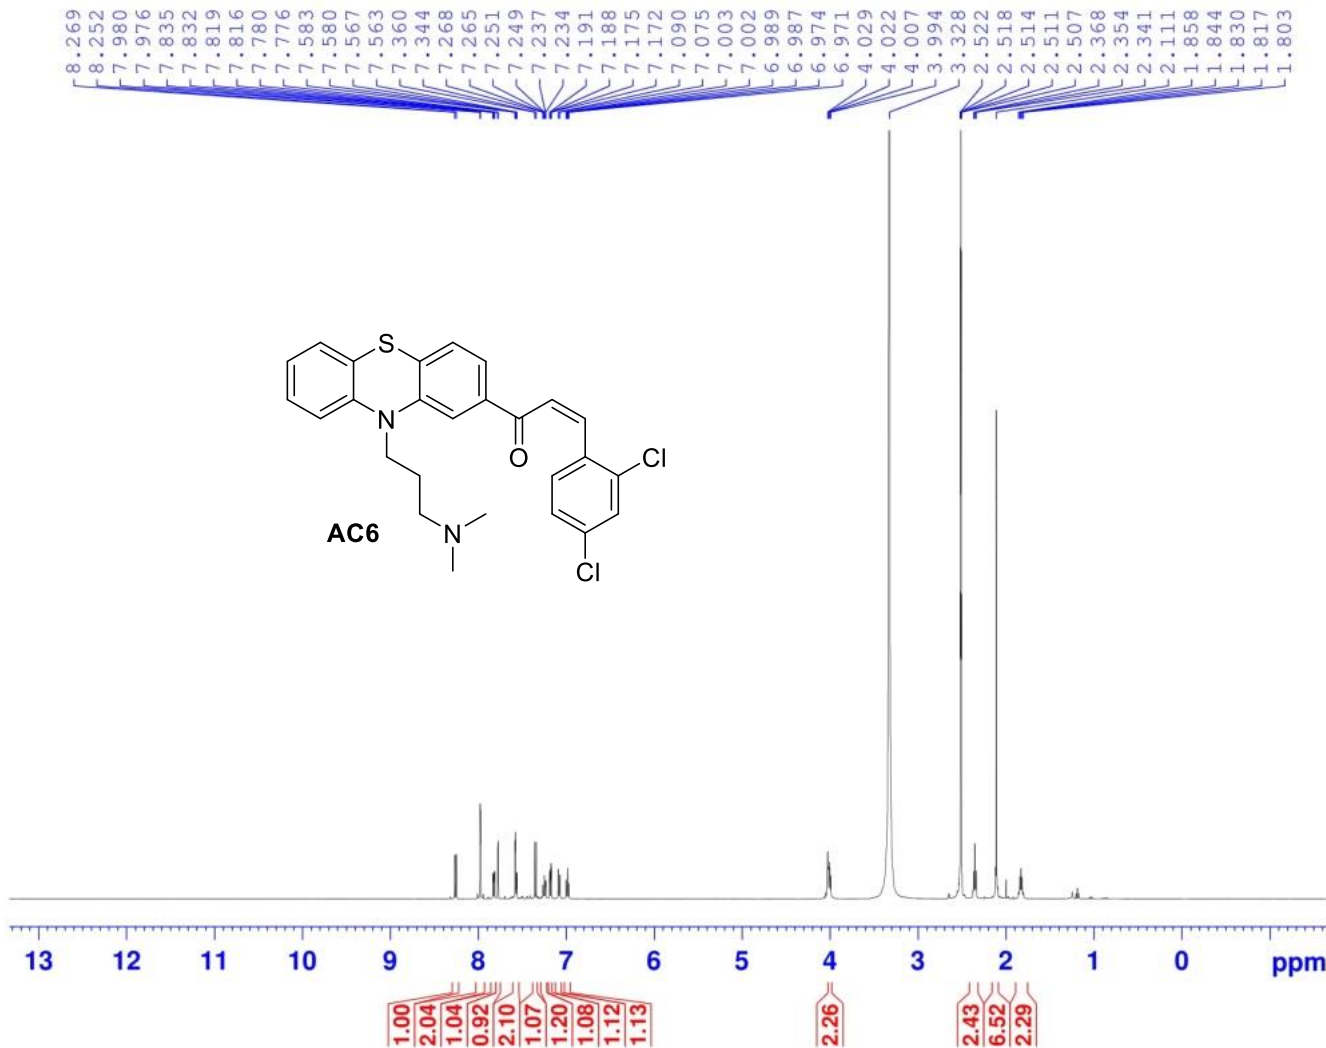

Current Data Parameters  
NAME 113D\_C8  
EXPNO 1  
PROCNO 1

F2 - Acquisition Parameters  
Date\_ 20170606  
Time 16.22  
INSTRUM spect  
PROBHD 5 mm PABBO BB/  
PULPROG zg30  
TD 65536  
SOLVENT DMSO  
NS 16  
DS 2  
SWH 10000.000 Hz  
FIDRES 0.152588 Hz  
AQ 3.2767999 sec  
RG 157.35  
DW 50.000 usec  
DE 6.50 usec  
TE 303.0 K  
D1 1.00000000 sec  
TD0 1

----- CHANNEL f1 -----  
SFO1 500.2030889 MHz  
NUC1 1H  
P1 10.00 usec  
PLW1 22.00000000 W

F2 - Processing parameters  
SI 65536  
SF 500.2000000 MHz  
WDW EM  
SSB 0  
LB 0.30 Hz  
GB 0  
PC 1.00

# <sup>1</sup>H-NMR

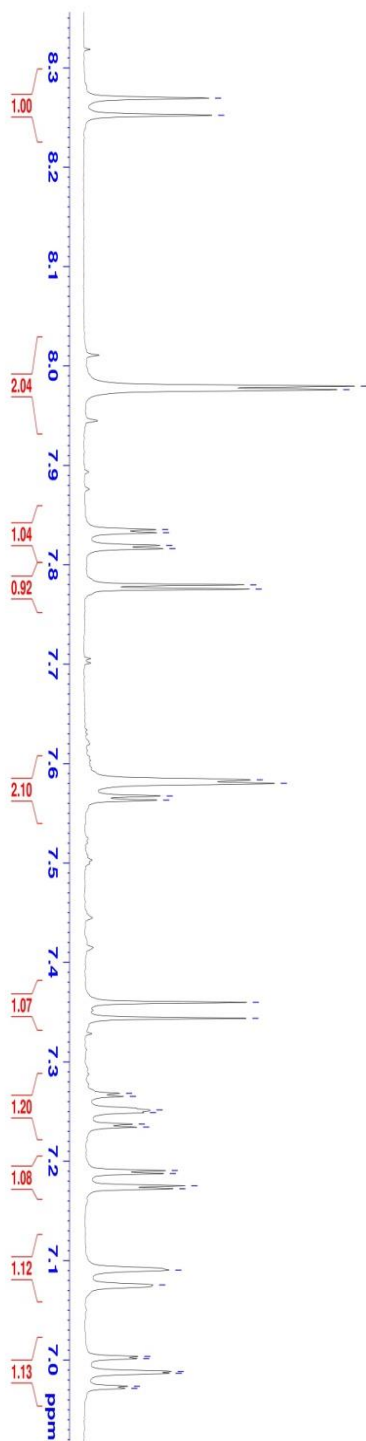

8.269  
8.252

7.980  
7.976

7.835  
7.832  
7.819  
7.816  
7.780  
7.776

**CDCl<sub>3</sub>-1H**

7.583  
7.580  
7.567  
7.563

7.360  
7.344  
7.268  
7.265  
7.251  
7.249  
7.237  
7.234  
7.234  
7.191  
7.188  
7.175  
7.172

**BRUKER**

7.090  
7.075  
7.003  
7.002  
6.989  
6.987  
6.974  
6.971

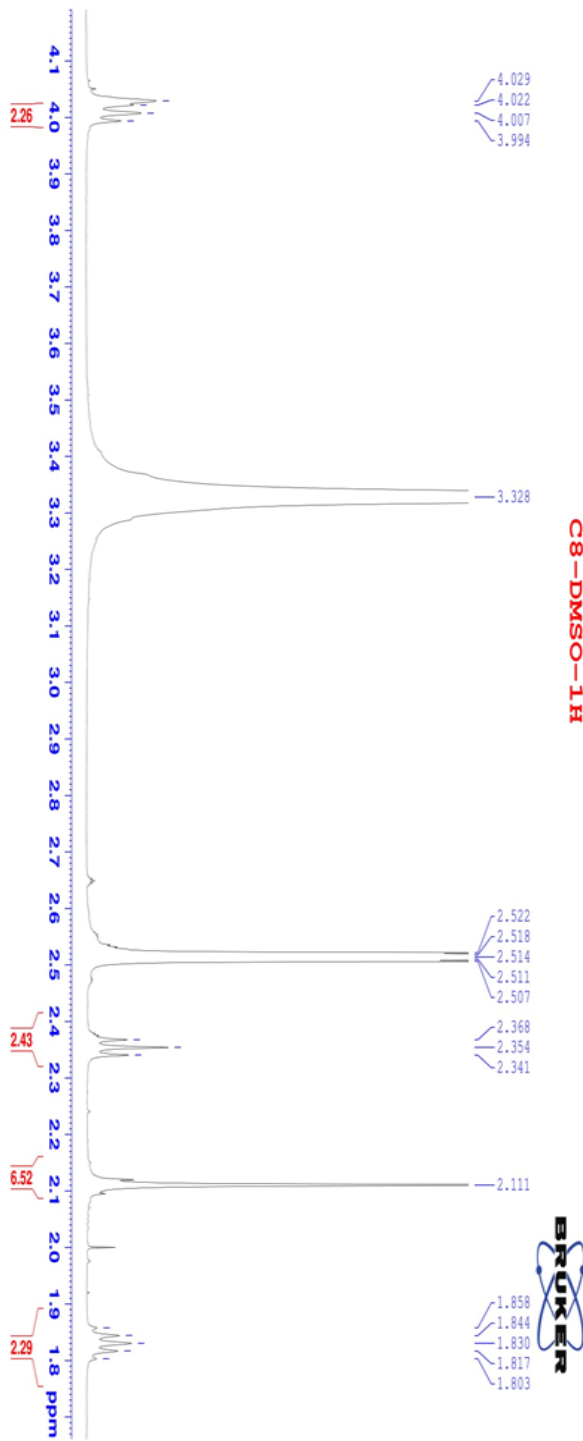

4.029  
4.022  
4.007  
3.994

2.26

3.328

**DMSO-d<sub>6</sub>-1H**

2.522  
2.518  
2.514  
2.511  
2.507

2.43

2.368  
2.354  
2.341

6.52

2.111

1.858  
1.844  
1.830  
1.817  
1.803

**BRUKER**

2.29

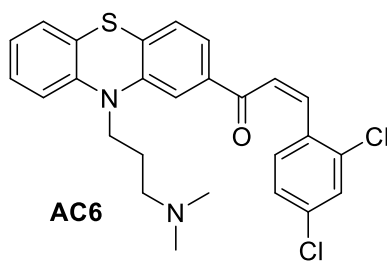

# <sup>13</sup>C-NMR

C8-DMSO-C13CPD

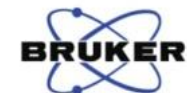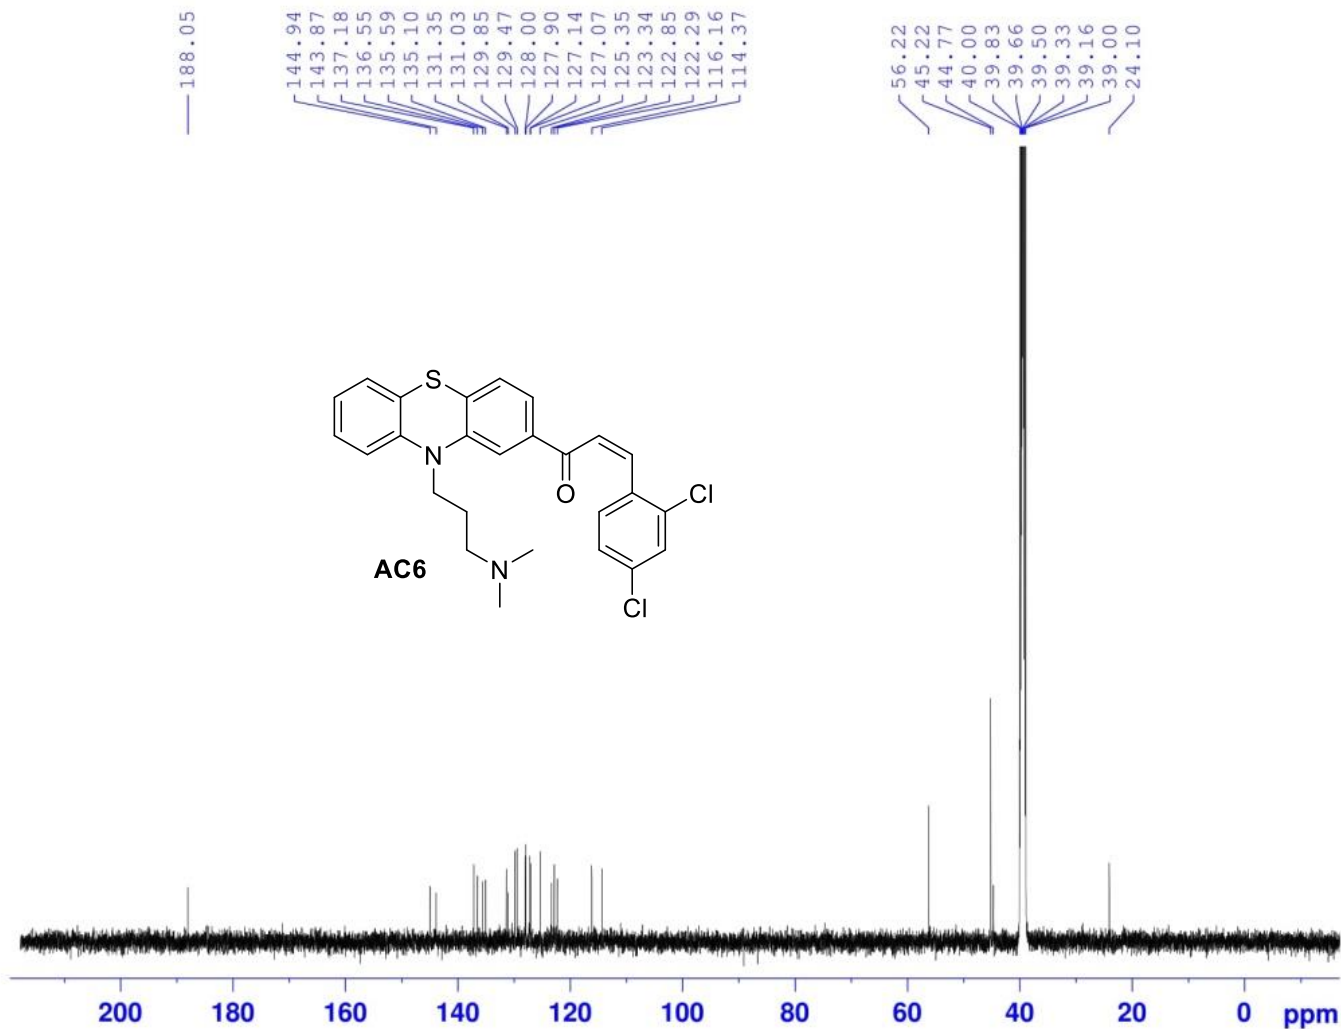

Current Data Parameters  
NAME 113D\_C8  
EXPNO 2  
PROCNO 1

F2 - Acquisition Parameters  
Date\_ 20170607  
Time 4.54  
INSTRUM spect  
PROBHD 5 mm PABBO BB/  
PULPROG zgpg30  
TD 65536  
SOLVENT DMSO  
NS 4096  
DS 4  
SWH 29761.904 Hz  
FIDRES 0.454131 Hz  
AQ 1.1010048 sec  
RG 198.57  
DW 16.800 usec  
DE 6.50 usec  
TE 303.0 K  
D1 2.00000000 sec  
D11 0.03000000 sec  
TD0 1

----- CHANNEL f1 -----  
SFO1 125.7879670 MHz  
NUC1 13C  
P1 10.00 usec  
PLW1 88.00000000 W

----- CHANNEL f2 -----  
SFO2 500.2020008 MHz  
NUC2 1H  
CPDPRG[2] waltz16  
PCPD2 80.00 usec  
PLW2 22.00000000 W  
PLW12 0.34375000 W  
PLW13 0.22000000 W

F2 - Processing parameters  
SI 32768  
SF 125.7754565 MHz  
WDW EM  
SSB 0  
LB 1.00 Hz  
GB 0  
PC 1.40

# $^{13}\text{C}$ -NMR

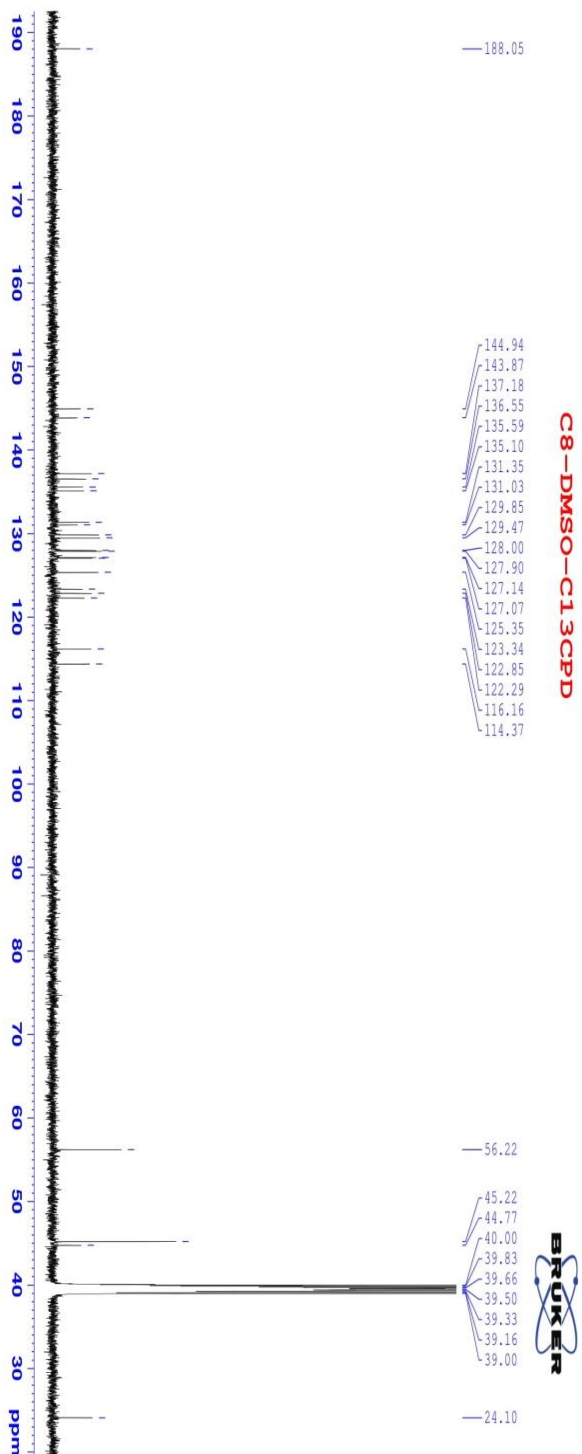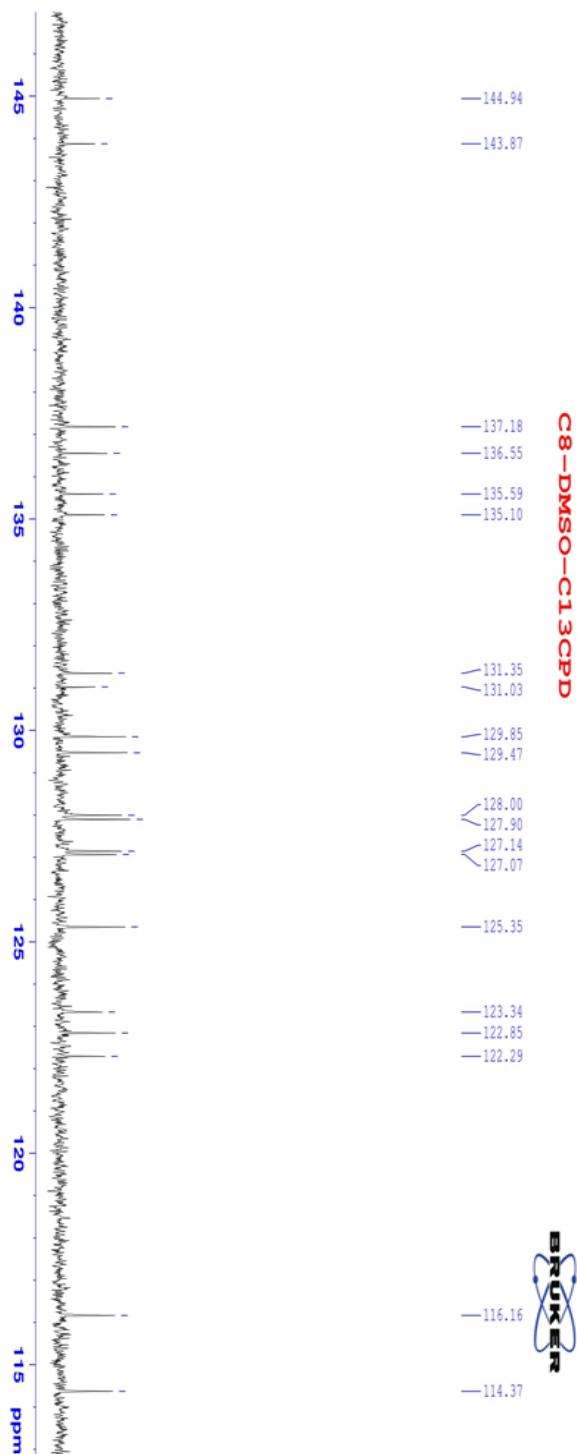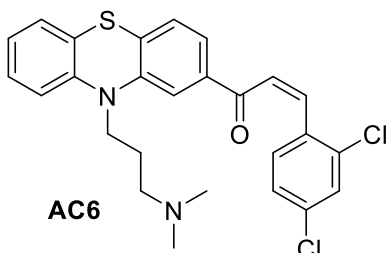

# $^{13}\text{C}$ -NMR

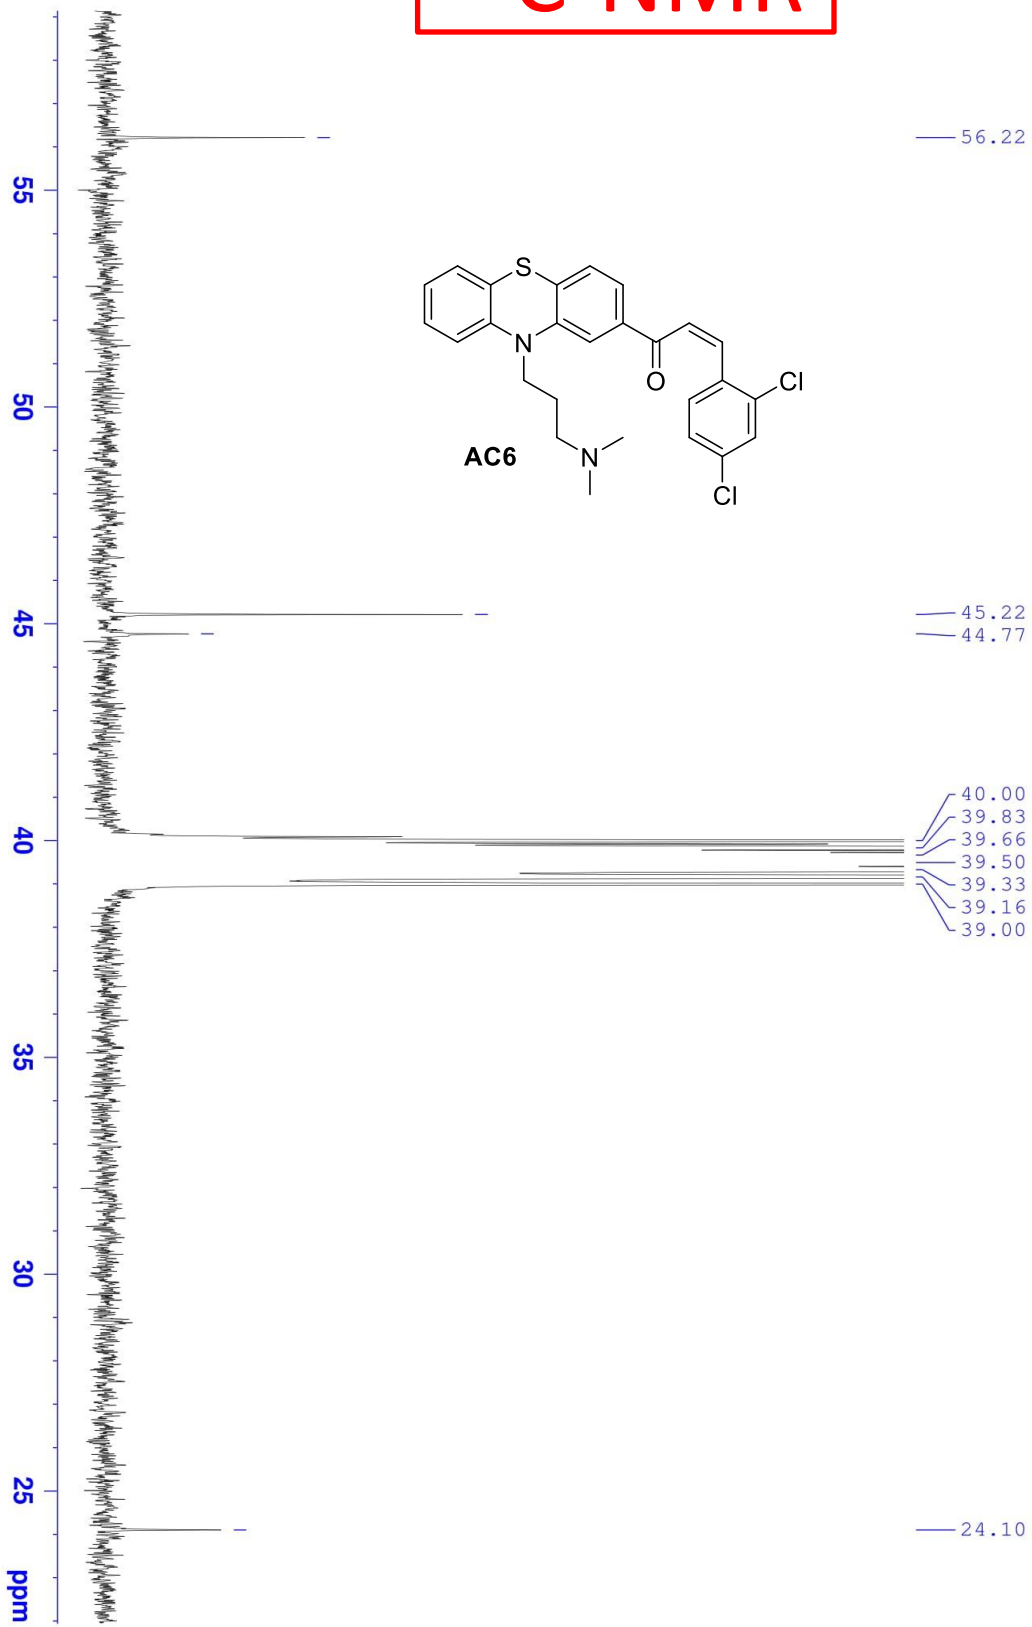

C8-DMSO-C13CPD

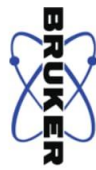

IR

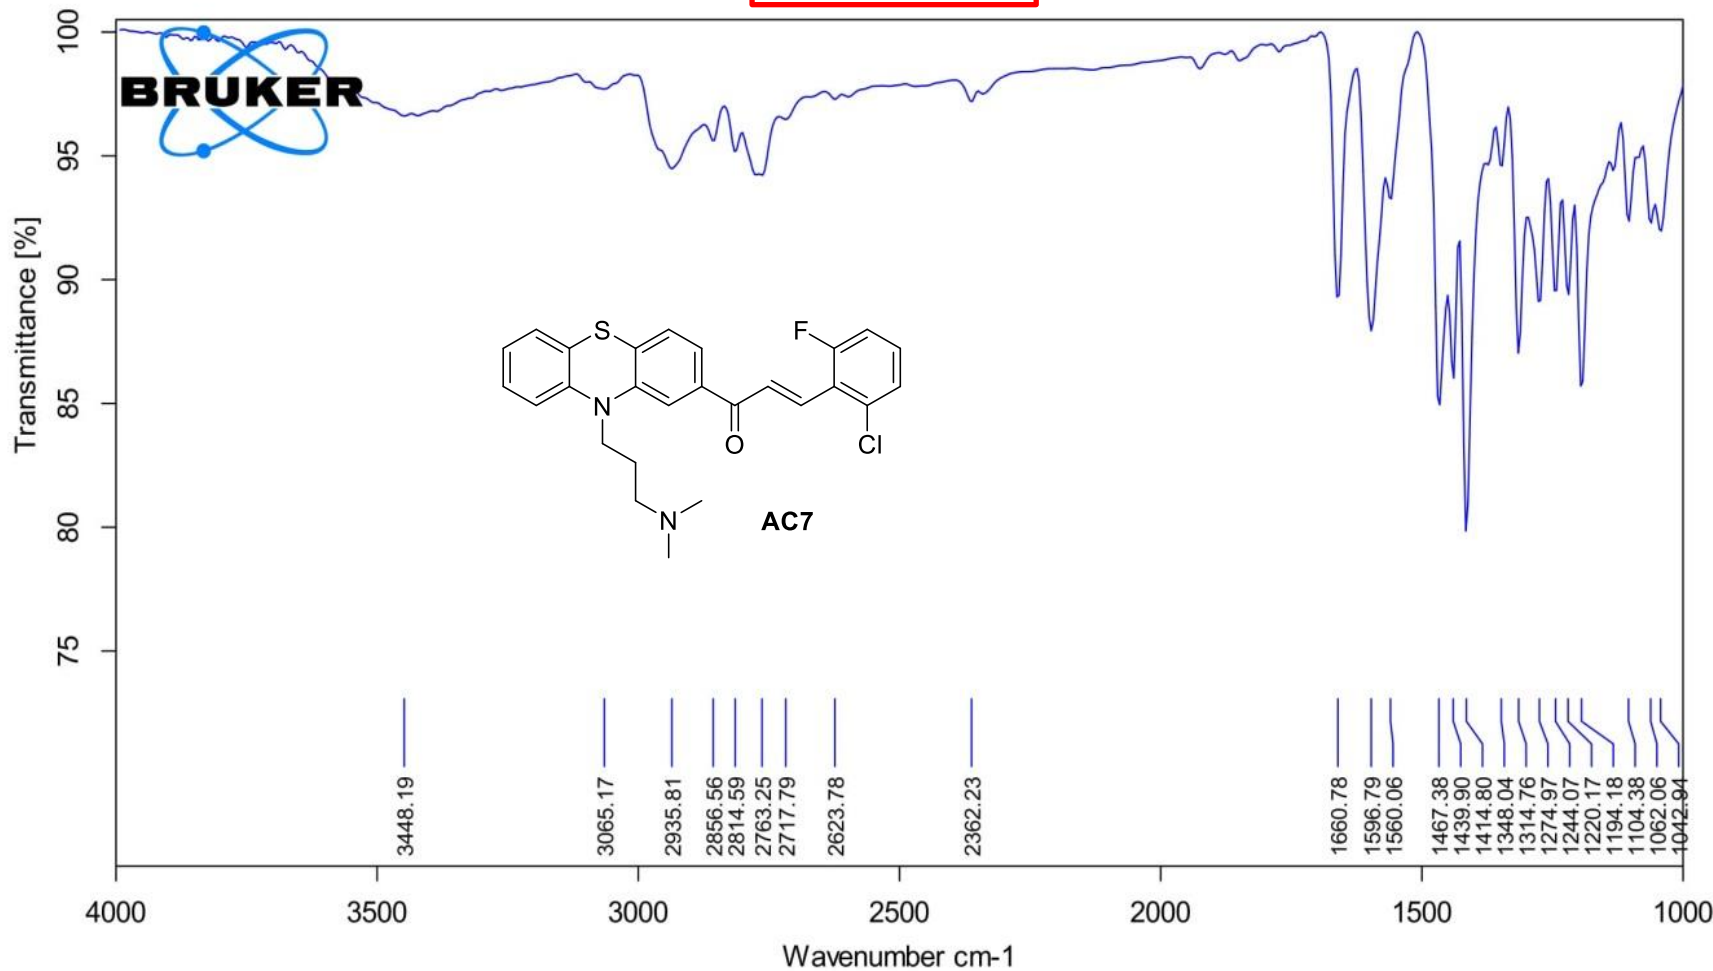

|                                      |    |                              |          |
|--------------------------------------|----|------------------------------|----------|
| E:\OPUS 7\2017\THANG 6\20170606\C6.0 | C6 | SENSOR 27 - BRUKER - GERMANY | 6/8/2017 |
|--------------------------------------|----|------------------------------|----------|

# MS

## Qualitative Analysis Report

|                               |                       |                       |                             |
|-------------------------------|-----------------------|-----------------------|-----------------------------|
| <b>Data Filename</b>          | 07-AC7.d              | <b>Sample Name</b>    | 07-AC7                      |
| <b>Sample Type</b>            | Sample                | <b>Position</b>       | P2-B7                       |
| <b>Instrument Name</b>        | Instrument 1          | <b>User Name</b>      |                             |
| <b>Acq Method</b>             | Cot ngan - MSMS_Pos.m | <b>Acquired Time</b>  | 22/08/2020 10:55:28 AM      |
| <b>IRM Calibration Status</b> | Success               | <b>DA Method</b>      | COTNGAN.M.m                 |
| <b>Comment</b>                |                       |                       |                             |
| <b>Sample Group</b>           |                       | <b>Info.</b>          |                             |
| <b>Stream Name</b>            | LC 1                  | <b>Acquisition SW</b> | 6200 series TOF/6500 series |
|                               |                       | <b>Version</b>        | Q-TOF B.06.01 (B6172 SP1)   |

### User Chromatograms

Fragmentor Voltage 140 Collision Energy 0 Ionization Mode ESI

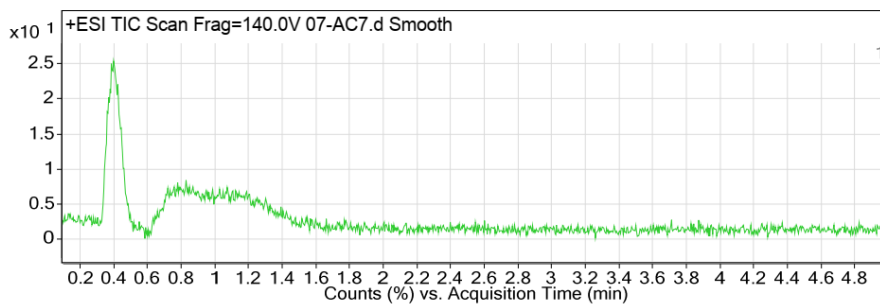

### User Spectra

Fragmentor Voltage 140 Collision Energy 0 Ionization Mode ESI

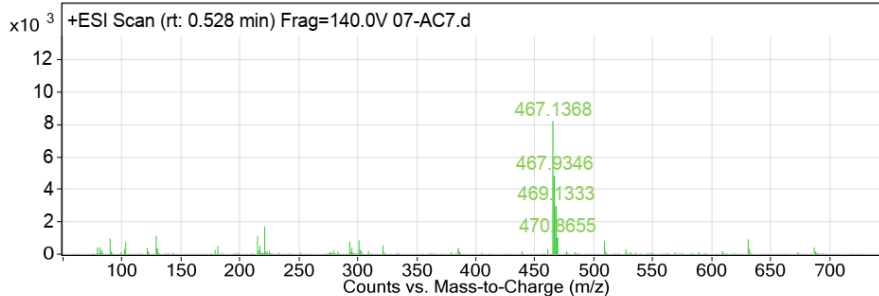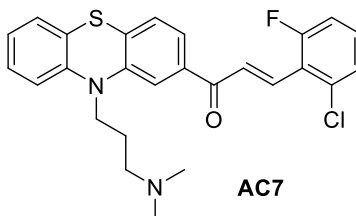

--- End Of Report ---



# MS

|               |          |             |                      |                 |              |                        |                        |
|---------------|----------|-------------|----------------------|-----------------|--------------|------------------------|------------------------|
| Sample Name   | 07-AC7   | Position    | P2-B7                | Instrument Name | Instrument 1 | User Name              |                        |
| Inj Vol       | 2        | InjPosition |                      | SampleType      | Sample       | IRM Calibration Status | Success                |
| Data Filename | 07-AC7.d | ACQ Method  | Cot ngan - MSMS_Pos. | Comment         |              | Acquired Time          | 22/08/2020 10:55:28 AM |

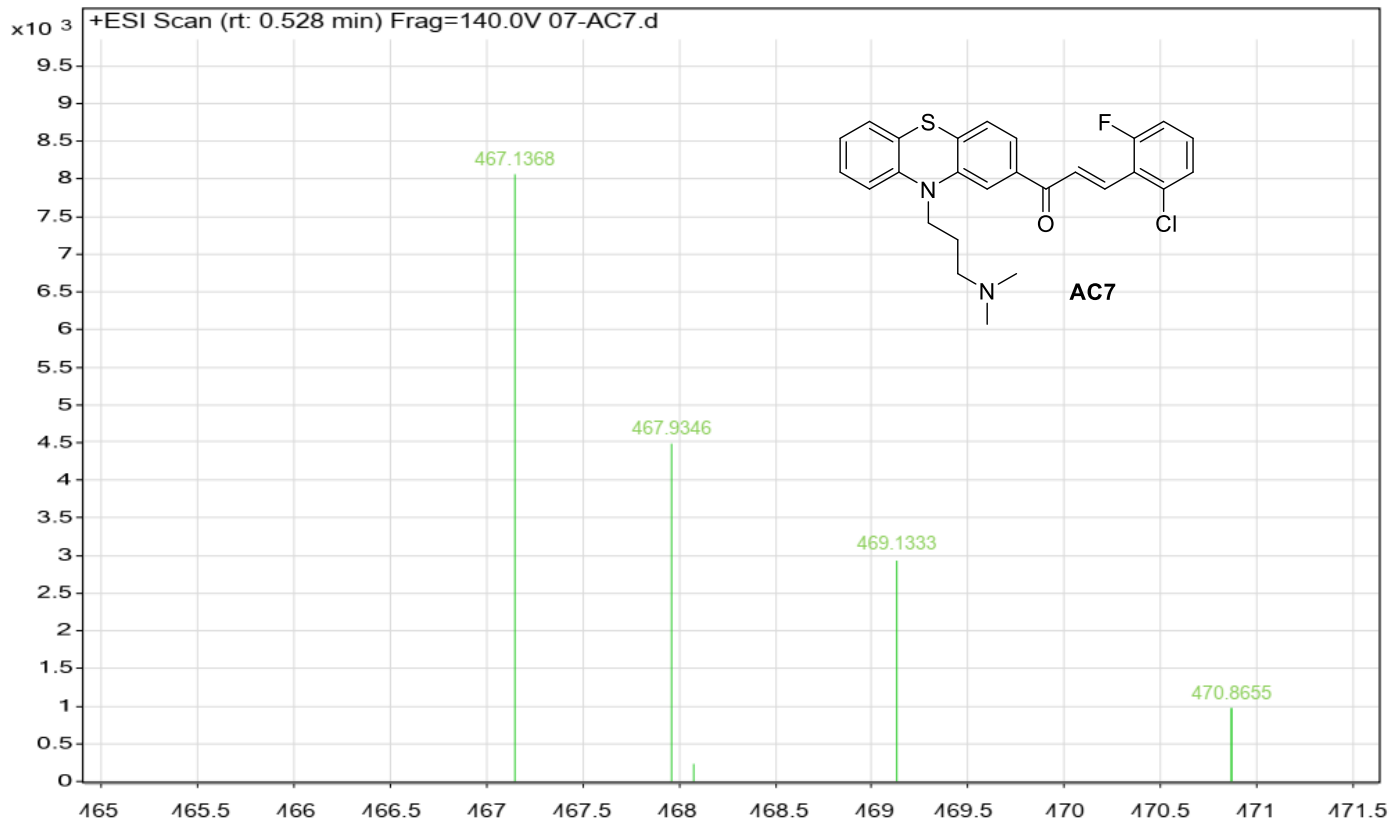

# <sup>1</sup>H-NMR

C6-DMSO-1H

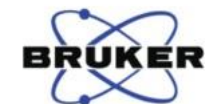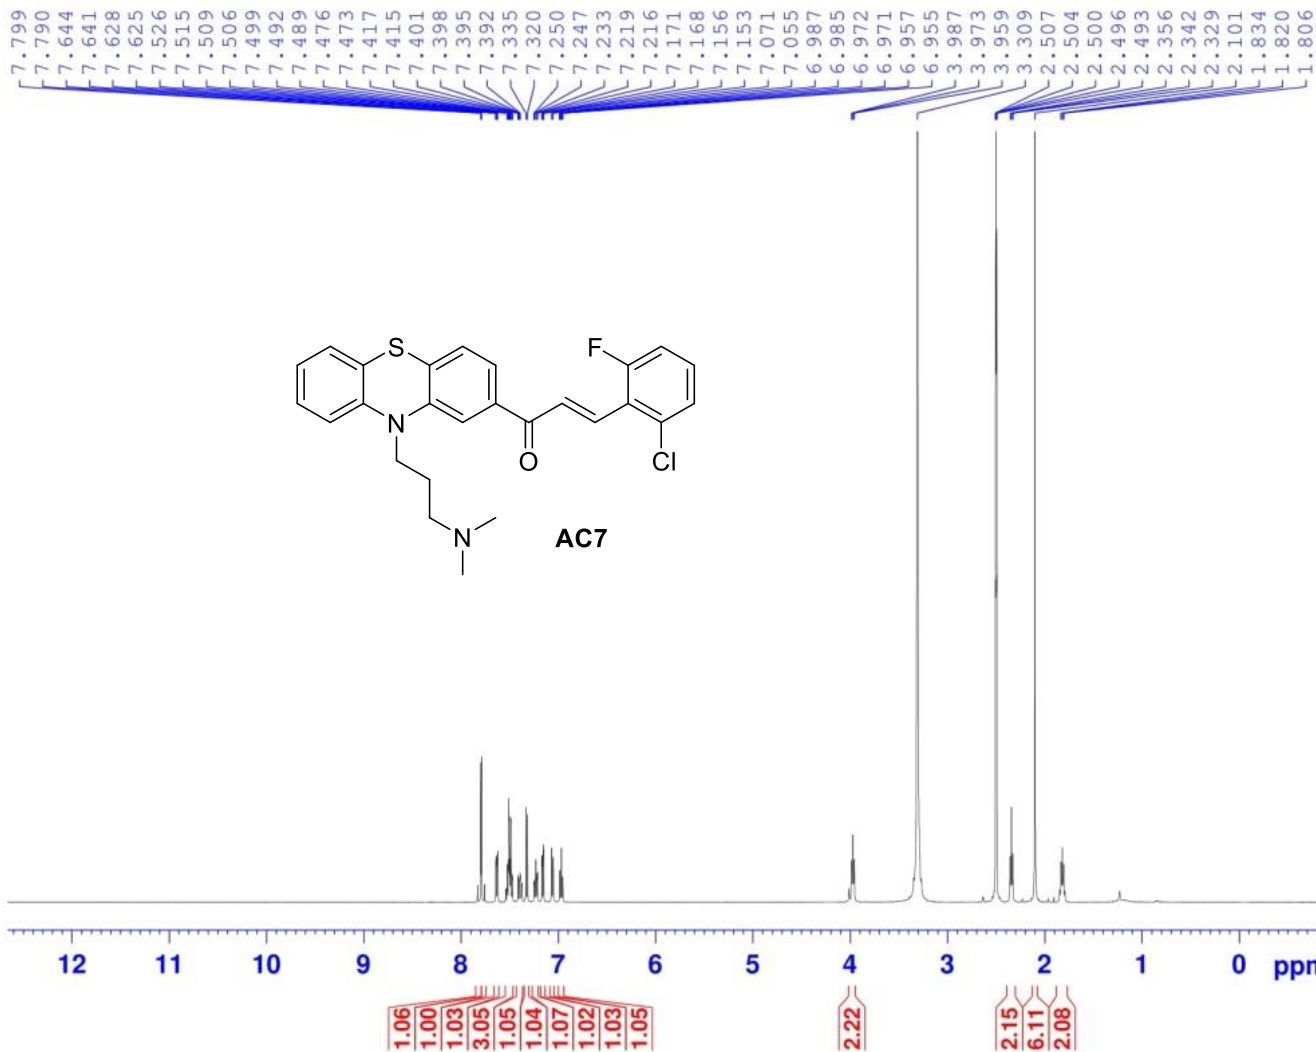

# $^1\text{H-NMR}$

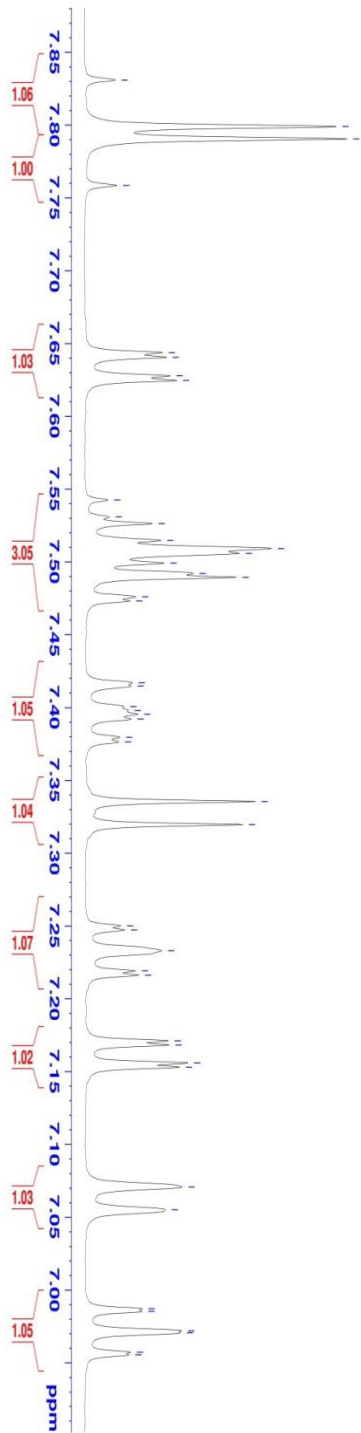

7.831  
7.799  
7.790  
7.759

7.644  
7.641  
7.628  
7.625

7.543  
7.531  
7.526  
7.515  
7.509  
7.506  
7.499  
7.492  
7.489  
7.476  
7.473  
7.417  
7.415  
7.401  
7.398  
7.395  
7.392  
7.380  
7.376  
7.335  
7.320

7.250  
7.247  
7.233  
7.219  
7.216  
7.171  
7.168  
7.156  
7.153

7.071  
7.055

6.987  
6.985  
6.972  
6.971  
6.957  
6.955

C6-DMSO- $\text{d}_6$

BRUKER

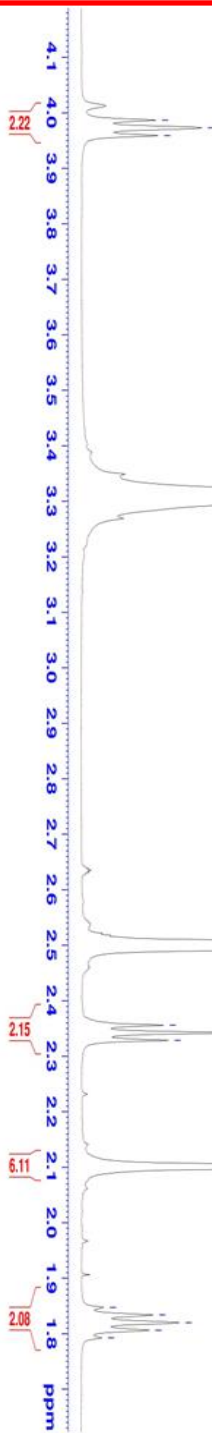

3.987  
3.973  
3.959

3.309

2.507  
2.504  
2.500  
2.496  
2.493  
2.356  
2.342  
2.329

2.101

1.847  
1.834  
1.820  
1.806  
1.793

C6-DMSO- $\text{d}_6$

BRUKER

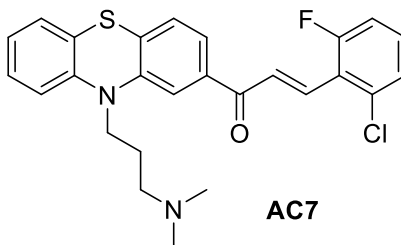

# <sup>13</sup>C-NMR

C6-DMSO-C13CPD

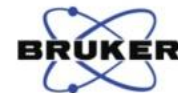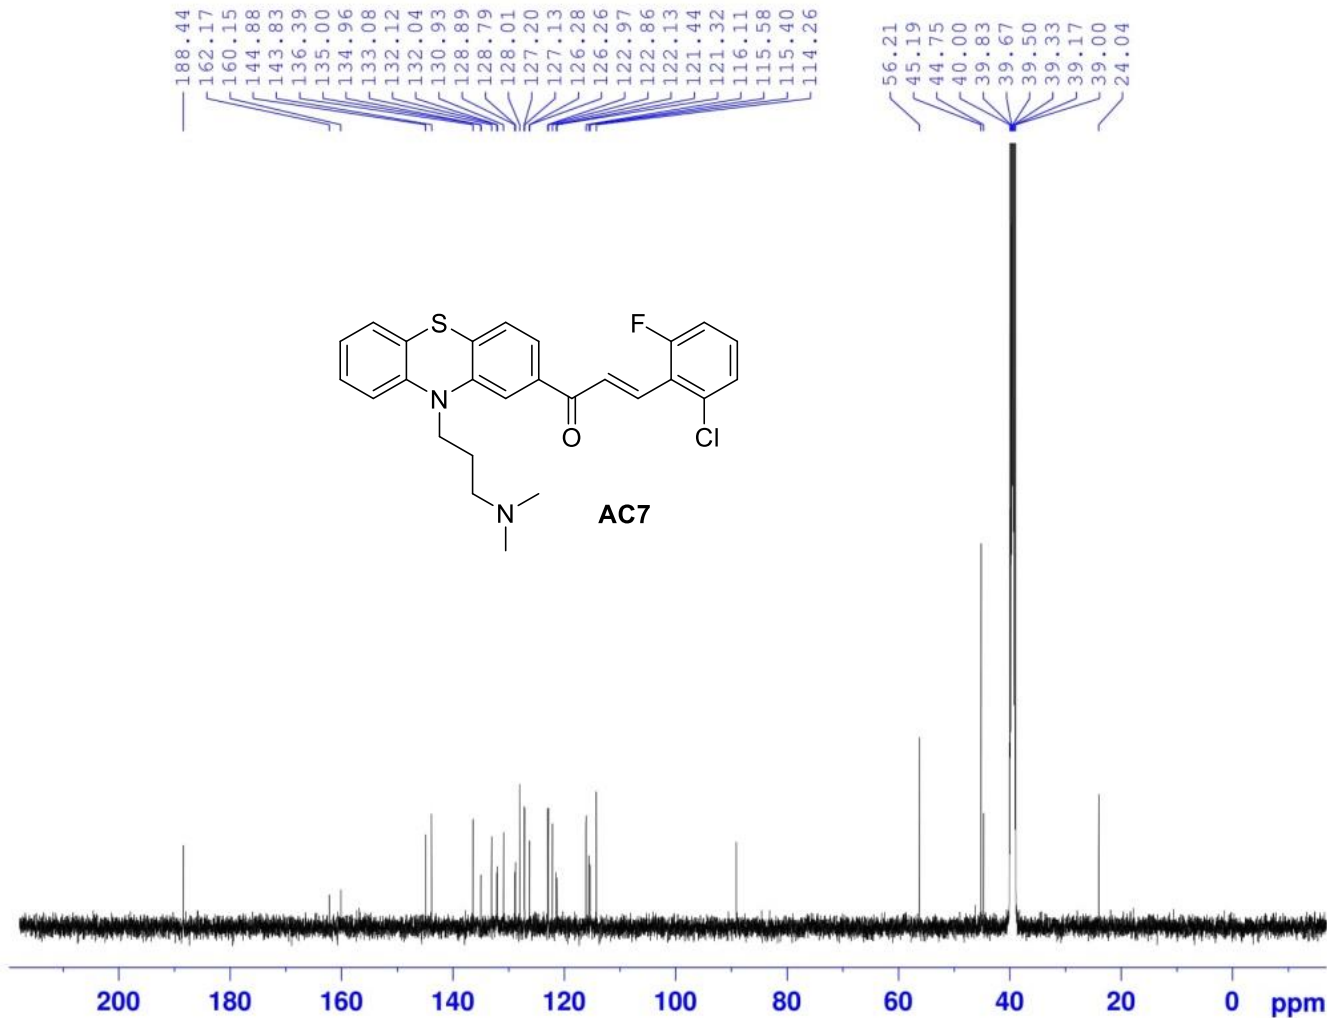

Current Data Parameters  
NAME 113D\_C6  
EXPNO 2  
PROCNO 1

F2 - Acquisition Parameters  
Date\_ 20170607  
Time 1.15  
INSTRUM spect  
PROBHD 5 mm PABBO BB/  
PULPROG zgpg30  
TD 65536  
SOLVENT DMSO  
NS 3072  
DS 4  
SWH 29761.904 Hz  
FIDRES 0.454131 Hz  
AQ 1.1010048 sec  
RG 198.57  
DW 16.800 usec  
DE 6.50 usec  
TE 303.0 K  
D1 2.00000000 sec  
D11 0.03000000 sec  
TD0 1

===== CHANNEL f1 =====  
SFO1 125.7879670 MHz  
NUC1 13C  
P1 10.00 usec  
PLW1 88.00000000 W

===== CHANNEL f2 =====  
SFO2 500.2020008 MHz  
NUC2 1H  
CPDPRG[2] waltz16  
PCPD2 80.00 usec  
PLW2 22.00000000 W  
PLW12 0.34375000 W  
PLW13 0.22000000 W

F2 - Processing parameters  
SI 32768  
SF 125.7754563 MHz  
WDW EM  
SSB 0  
LB 1.00 Hz  
GB 0  
PC 1.40

# $^{13}\text{C}$ -NMR

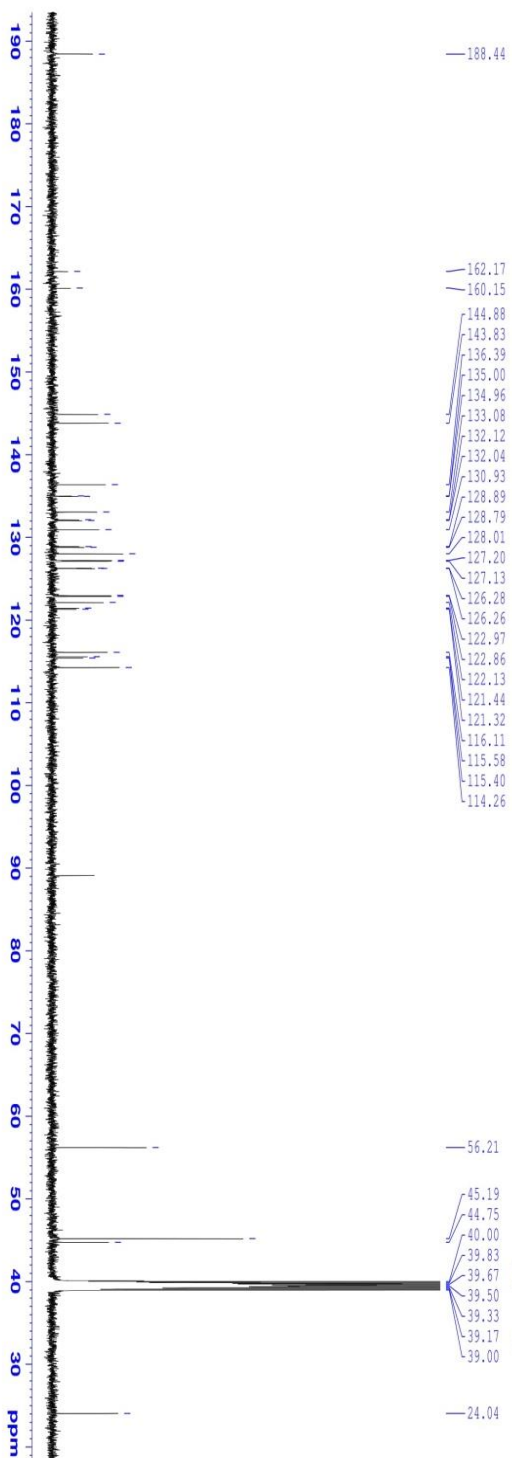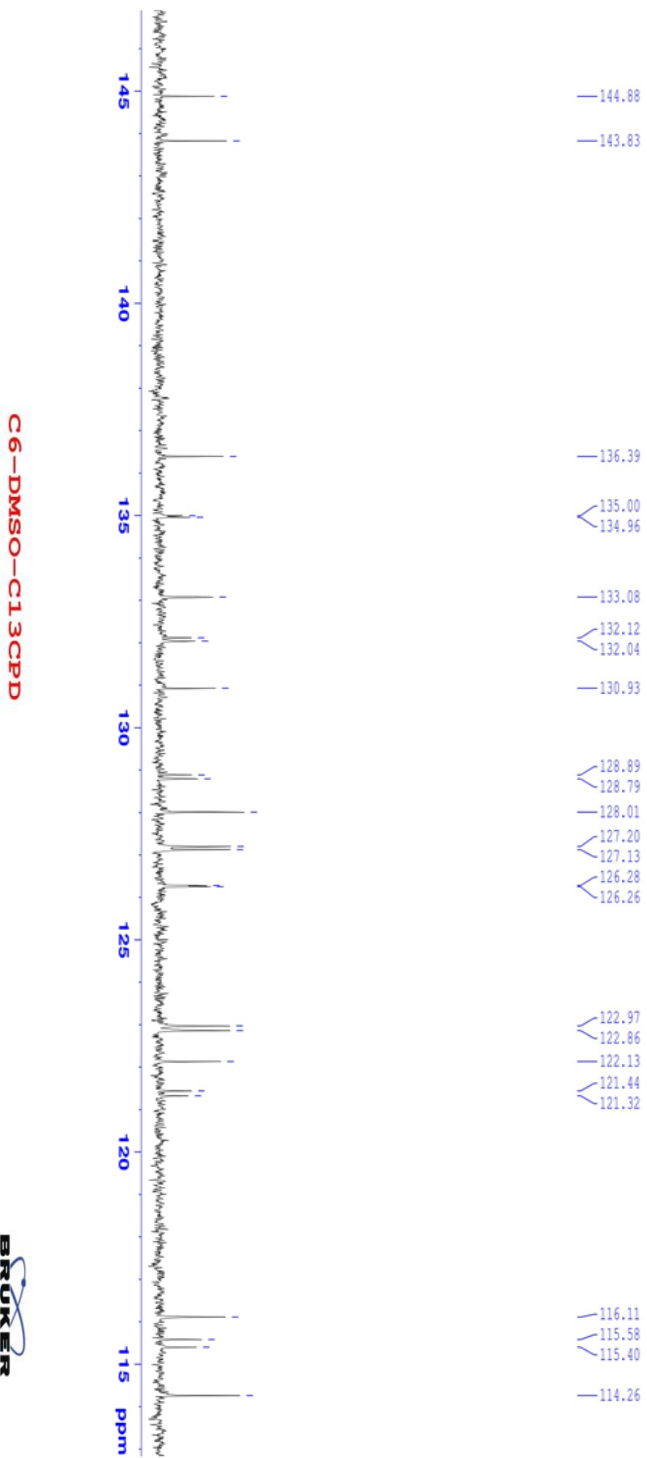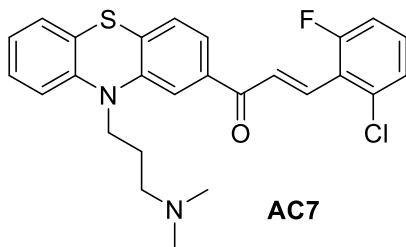

# $^{13}\text{C-NMR}$

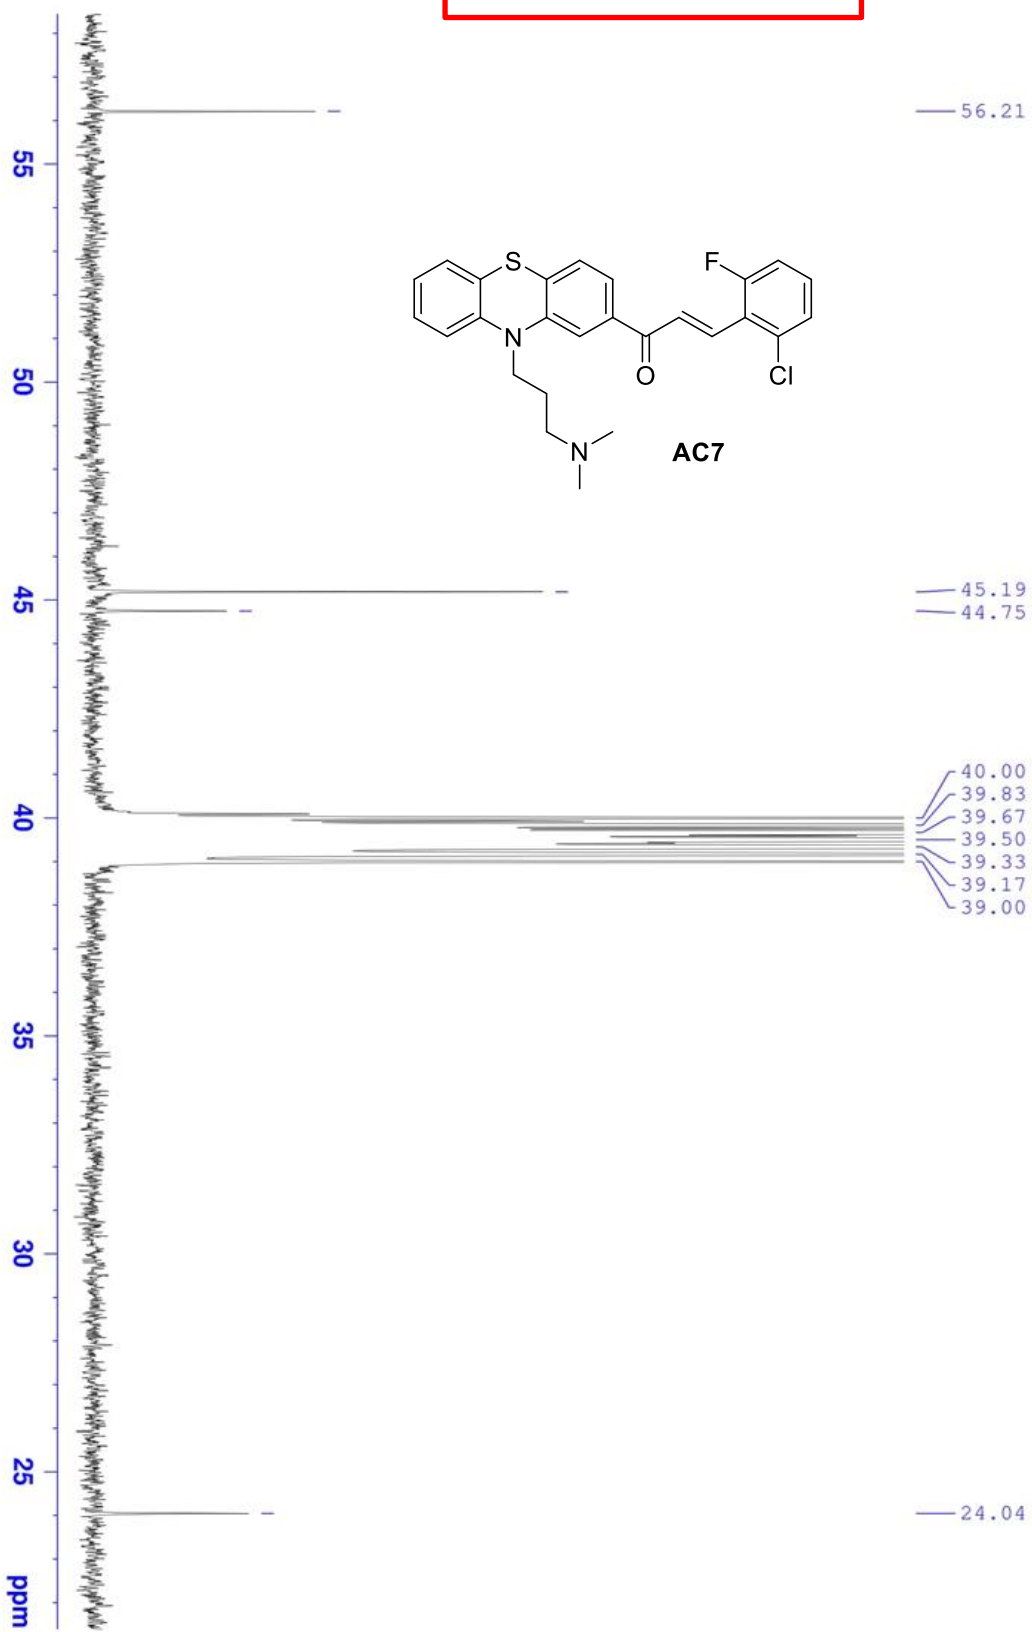

C6-DMSO-C13CPD

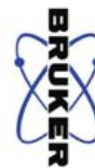

IR

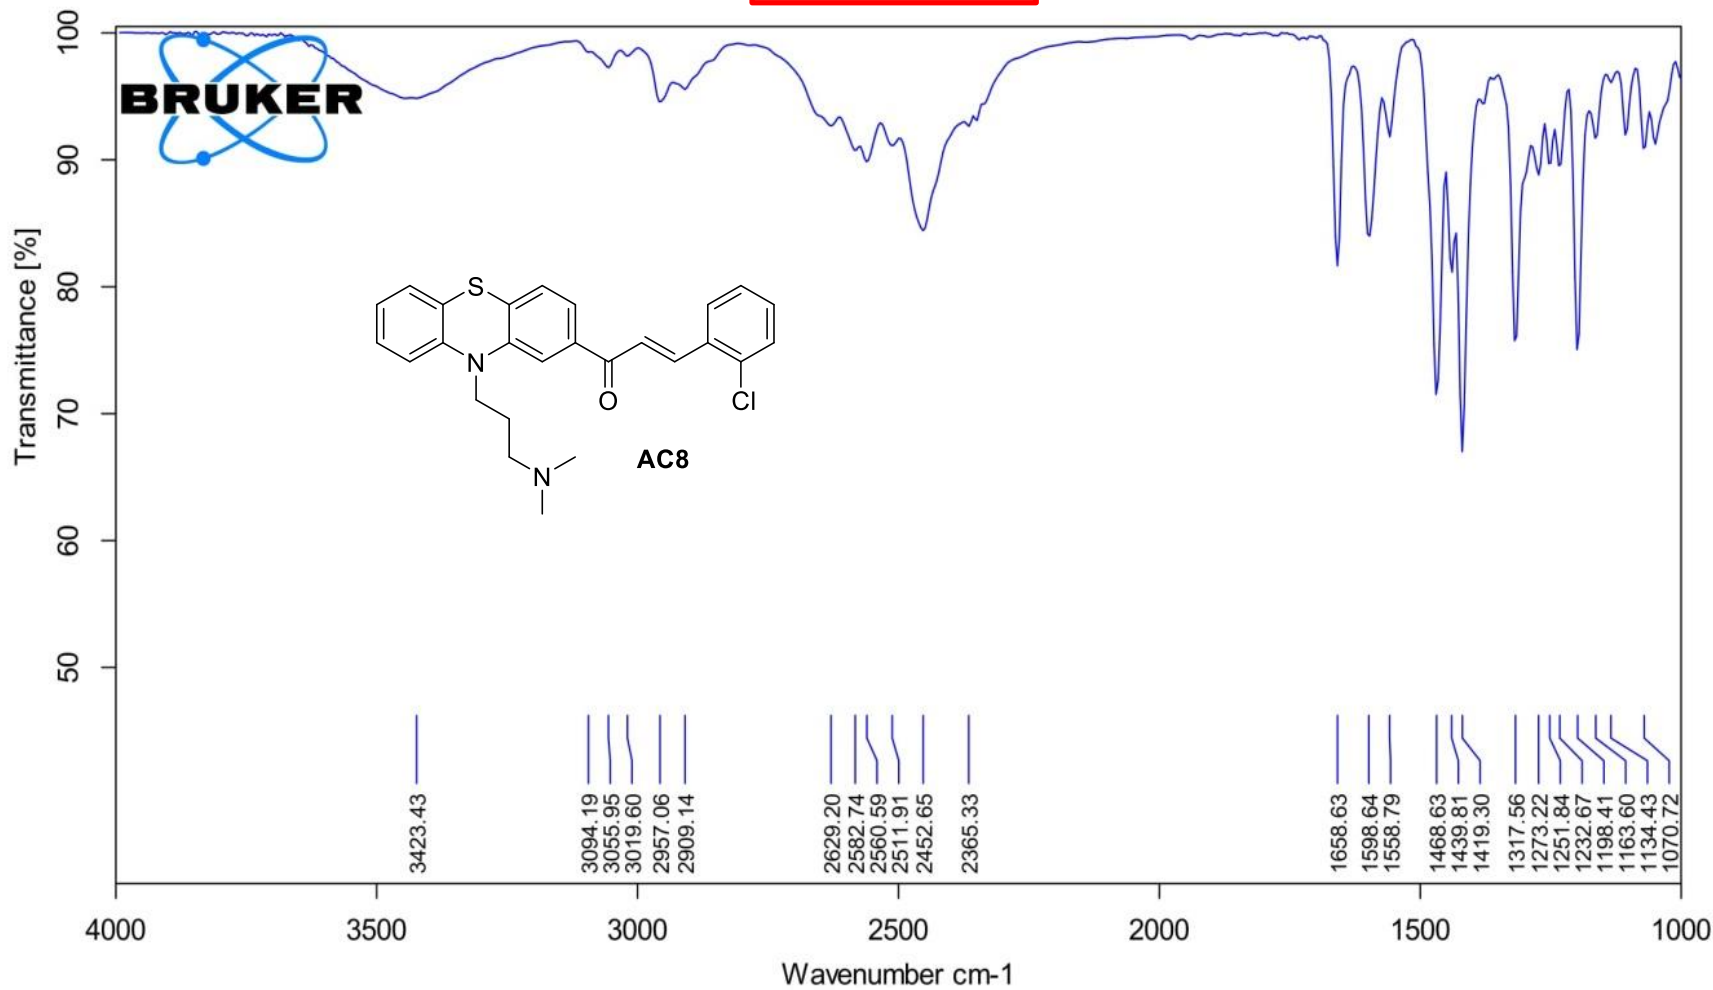

# MS

## Qualitative Analysis Report

|                               |                       |                       |                             |
|-------------------------------|-----------------------|-----------------------|-----------------------------|
| <b>Data Filename</b>          | 08-AC8.d              | <b>Sample Name</b>    | 08-AC8                      |
| <b>Sample Type</b>            | Sample                | <b>Position</b>       | P2-C5                       |
| <b>Instrument Name</b>        | Instrument 1          | <b>User Name</b>      |                             |
| <b>Acq Method</b>             | Cot ngan - MSMS_Pos.m | <b>Acquired Time</b>  | 22/08/2020 11:14:25 AM      |
| <b>IRM Calibration Status</b> | Success               | <b>DA Method</b>      | COTNGAN.M.m                 |
| <b>Comment</b>                |                       |                       |                             |
| <b>Sample Group</b>           |                       | <b>Info.</b>          |                             |
| <b>Stream Name</b>            | LC 1                  | <b>Acquisition SW</b> | 6200 series TOF/6500 series |
|                               |                       | <b>Version</b>        | Q-TOF B.06.01 (B6172 SP1)   |

### User Chromatograms

Fragmentor Voltage 140 Collision Energy 0 Ionization Mode ESI

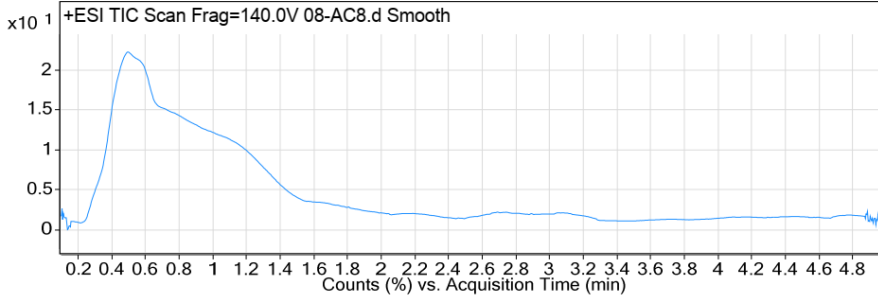

### User Spectra

Fragmentor Voltage 140 Collision Energy 0 Ionization Mode ESI

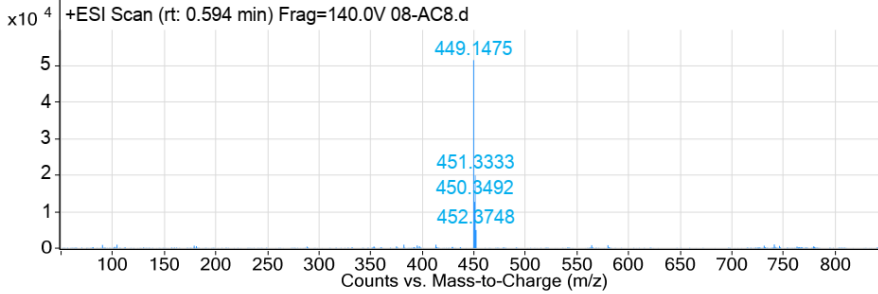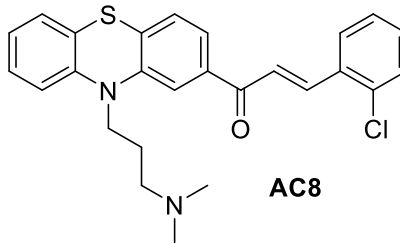

--- End Of Report ---



# MS

|               |          |             |                      |                 |              |                        |                        |
|---------------|----------|-------------|----------------------|-----------------|--------------|------------------------|------------------------|
| Sample Name   | 08-AC8   | Position    | P2-C5                | Instrument Name | Instrument 1 | User Name              |                        |
| Inj Vol       | 2        | InjPosition |                      | SampleType      | Sample       | IRM Calibration Status | Success                |
| Data Filename | 08-AC8.d | ACQ Method  | Cot ngan - MSMS_Pos. | Comment         |              | Acquired Time          | 22/08/2020 11:14:25 AM |

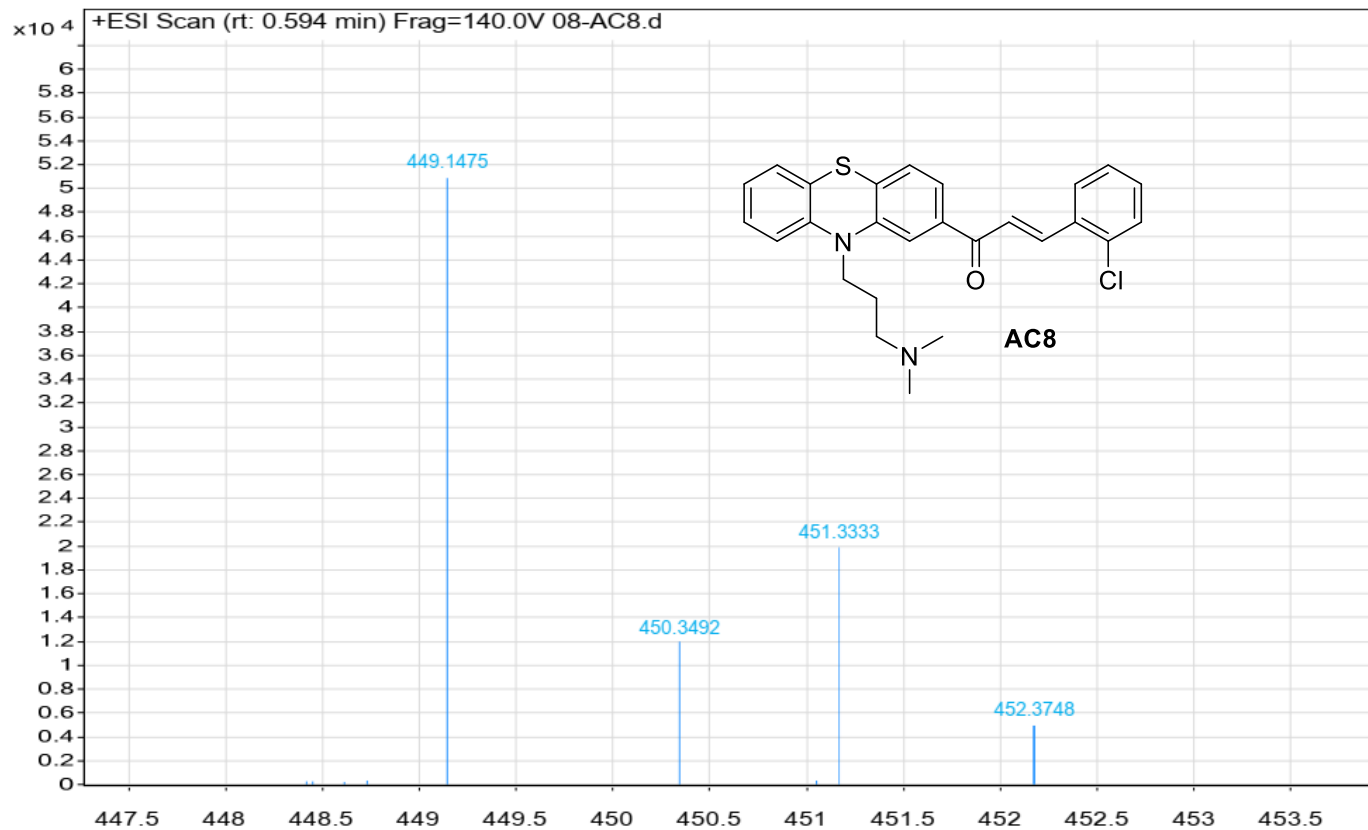

# <sup>1</sup>H-NMR

C1-MeOD-1H

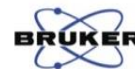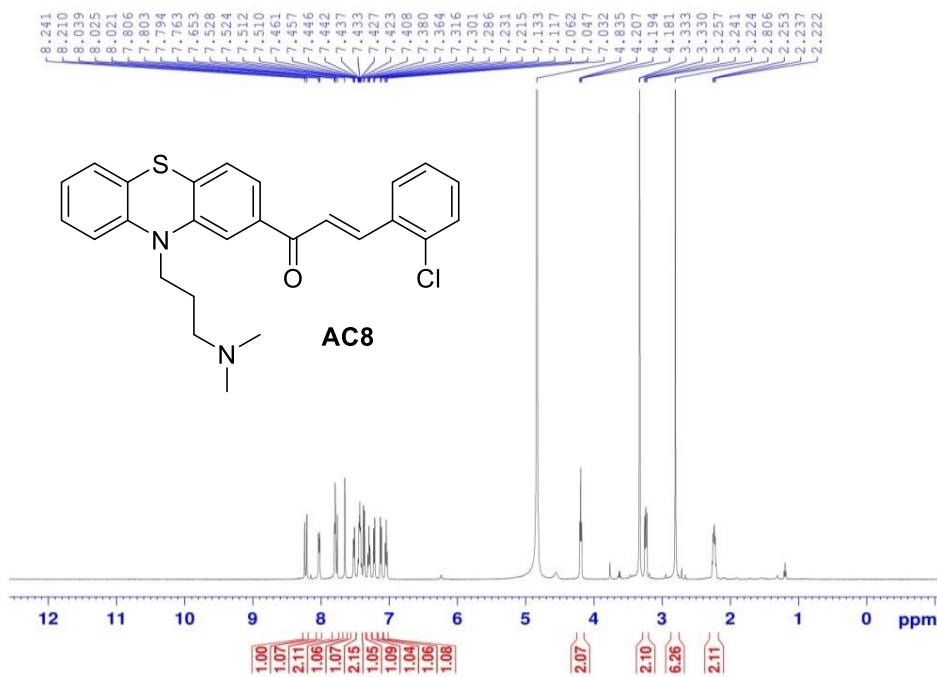

Current Data Parameters  
NAME 113D\_C1  
EXPNO 1  
PROCNO 1

F2 - Acquisition Parameters  
Date\_ 20170506  
Time 15.08  
INSTRUM spect  
PROBHD 5 mm PABBO BB/  
PULPROG zg30  
TD 65536  
SOLVENT MeOD  
NS 16  
DS 2  
SWH 10000.000 Hz  
FIDRES 0.152588 Hz  
AQ 3.2767999 sec  
RG 157.35  
DW 50.000 usec  
DE 6.50 usec  
TE 303.0 K  
D1 1.00000000 sec  
TDO 1

===== CHANNEL f1 =====  
SFO1 500.2030889 MHz  
NUC1 1H  
P1 10.00 usec  
PLW1 22.00000000 W

F2 - Processing parameters  
SI 65536  
SF 500.2000008 MHz  
WDW EM  
SSB 0  
LB 0.30 Hz  
GB 0  
PC 1.00

C1-MeOD-1H

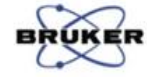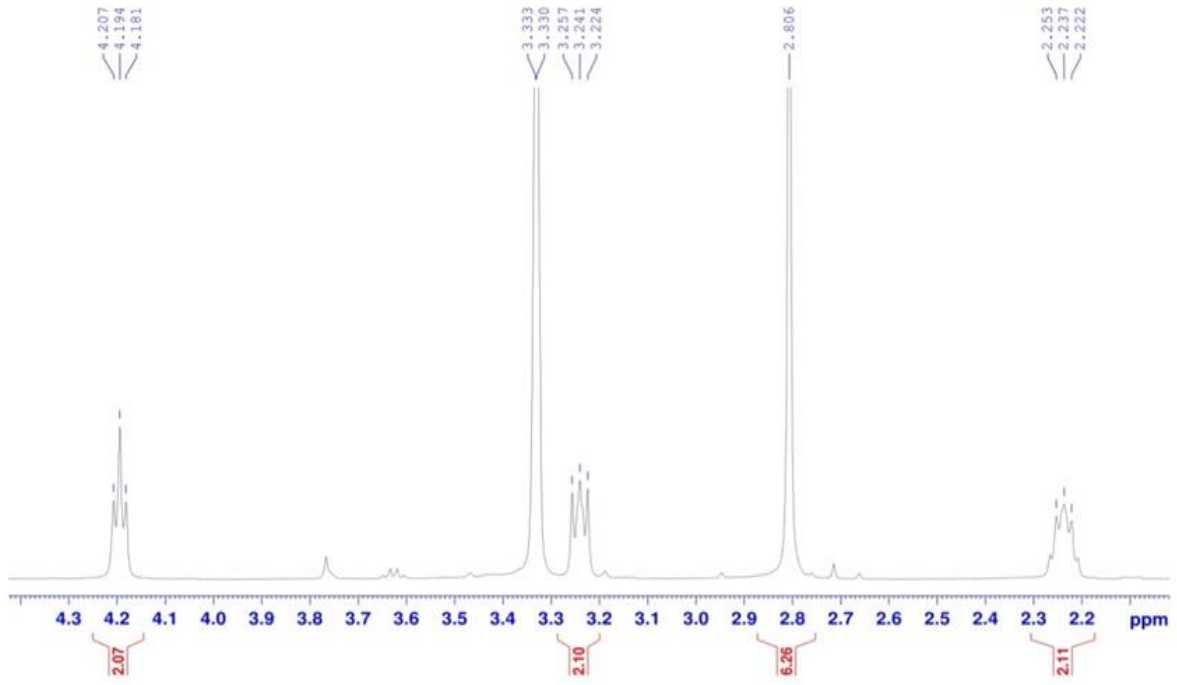

# <sup>1</sup>H-NMR

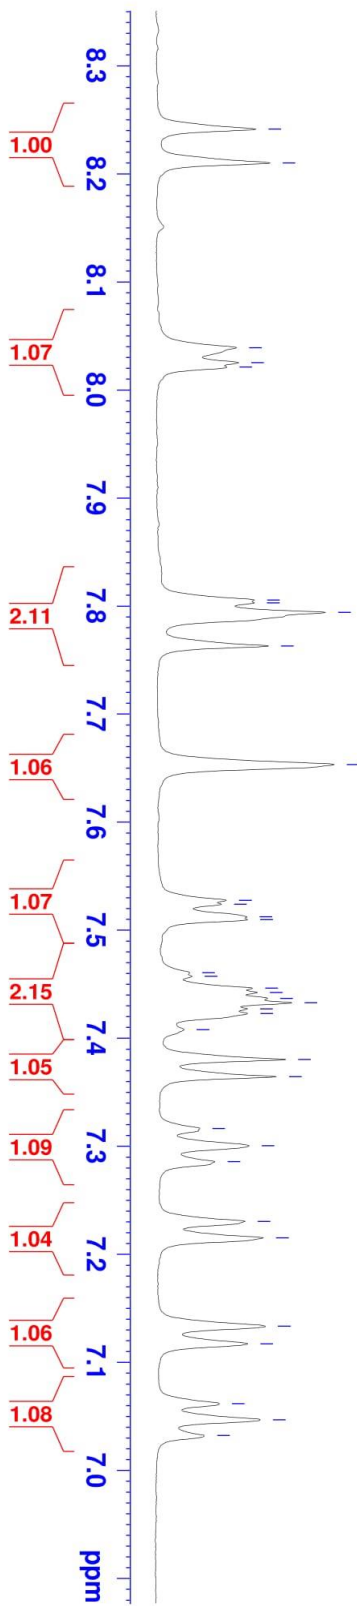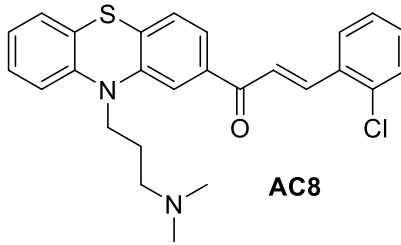

8.241

8.210

8.039

8.025

8.021

7.806

7.803

7.794

7.763

7.653

7.528

7.524

7.512

7.510

7.461

7.457

7.446

7.442

7.437

7.433

7.427

7.423

7.408

7.380

7.364

7.316

7.301

7.286

7.231

7.215

7.133

7.117

7.062

7.047

7.032

CDCl<sub>3</sub>-MeOD-1H

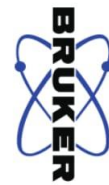

# $^{13}\text{C}$ -NMR

C1-MeOD-C13CPD

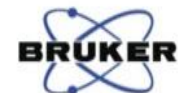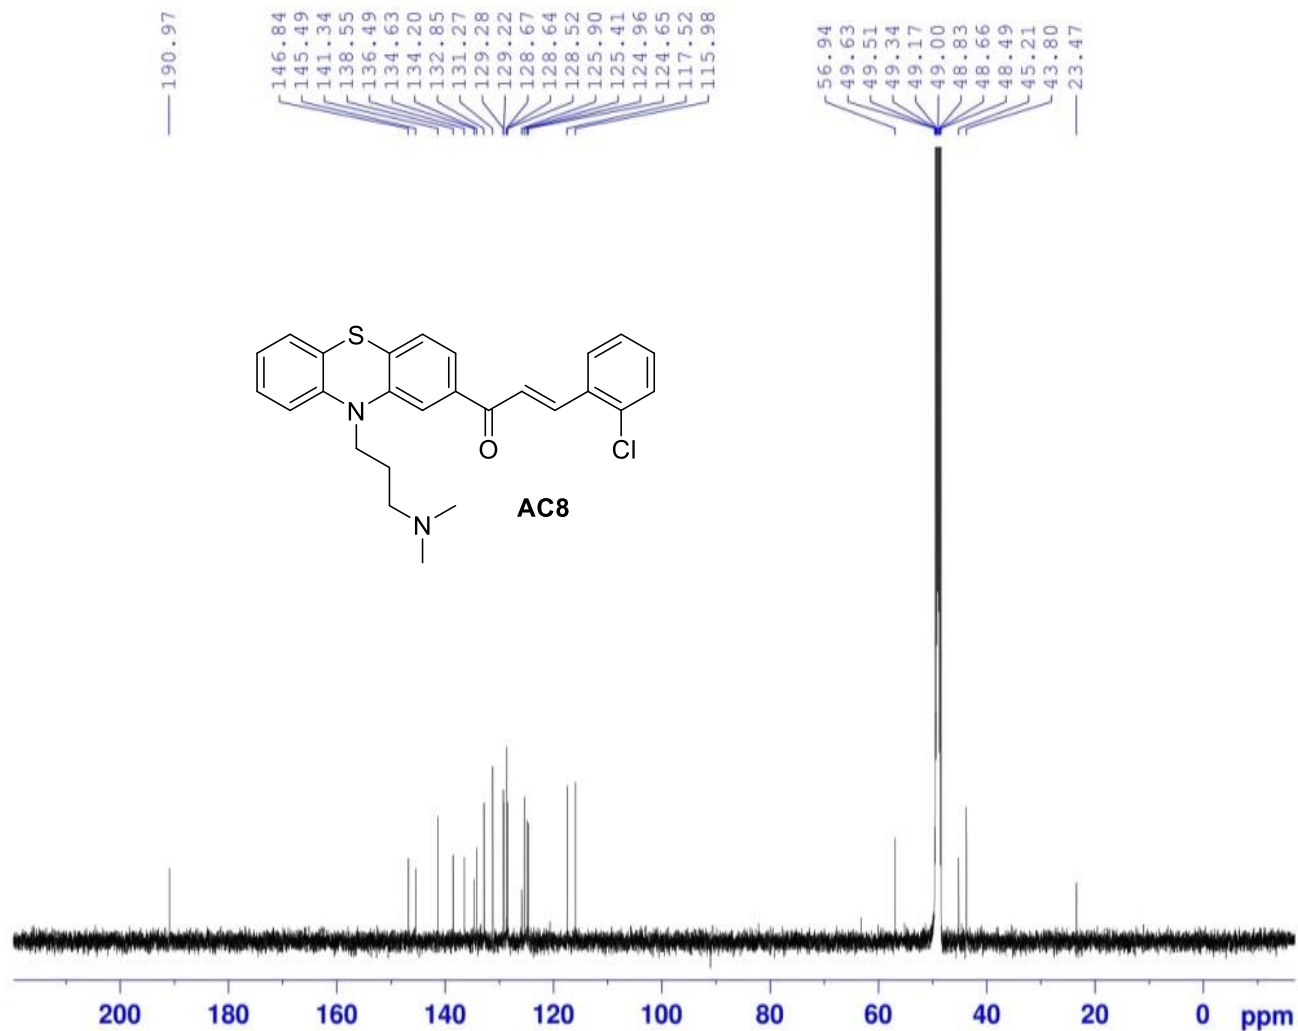

Current Data Parameters  
NAME 113D\_C1  
EXPNO 2  
PROCNO 1

F2 - Acquisition Parameters  
Date\_ 20170607  
Time 7.46  
INSTRUM spect  
PROBHD 5 mm PABBO BB/  
PULPROG zgpg30  
TD 65536  
SOLVENT MeOD  
NS 2048  
DS 4  
SWH 29761.904 Hz  
FIDRES 0.454131 Hz  
AQ 1.1010048 sec  
RG 198.57  
DW 16.800 usec  
DE 6.50 usec  
TE 303.0 K  
D1 2.00000000 sec  
D11 0.03000000 sec  
TD0 1

----- CHANNEL f1 -----  
SFO1 125.7879670 MHz  
NUC1 13C  
P1 10.00 usec  
PLW1 88.00000000 W

----- CHANNEL f2 -----  
SFO2 500.2020008 MHz  
NUC2 1H  
CPDPRG[2] waltz16  
PCPD2 80.00 usec  
PLW2 22.00000000 W  
PLW12 0.34375000 W  
PLW13 0.22000000 W

F2 - Processing parameters  
SI 32768  
SF 125.7752134 MHz  
WDW EM  
SSB 0  
LB 1.00 Hz  
GB 0  
PC 1.40

# $^{13}\text{C}$ -NMR

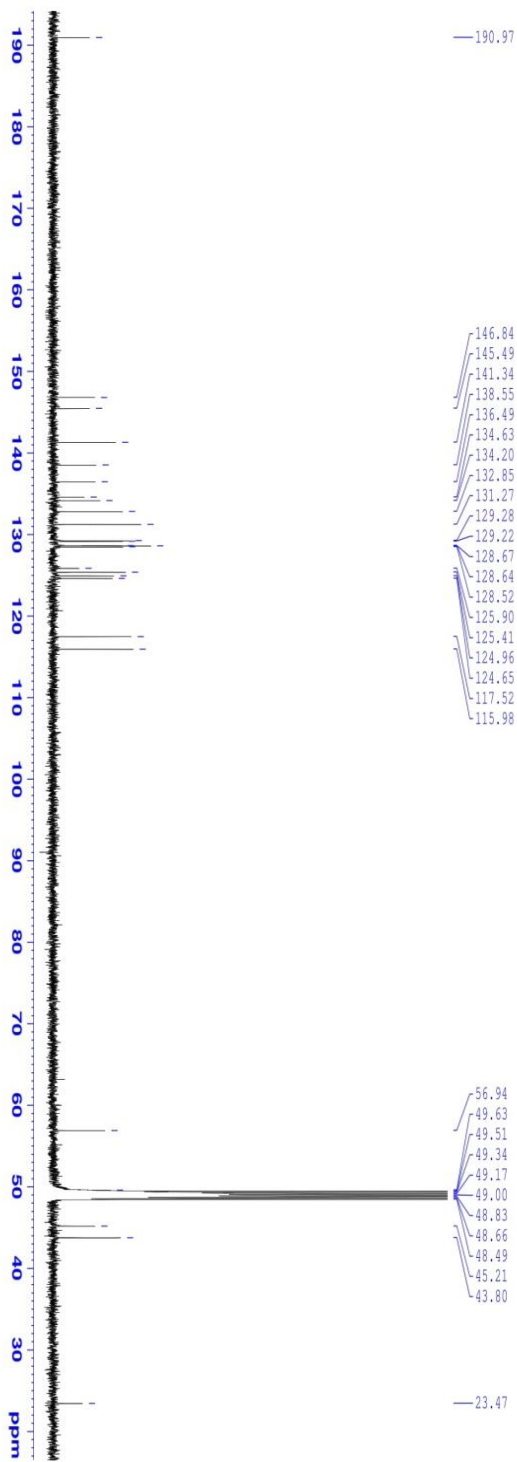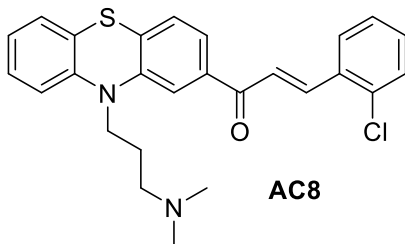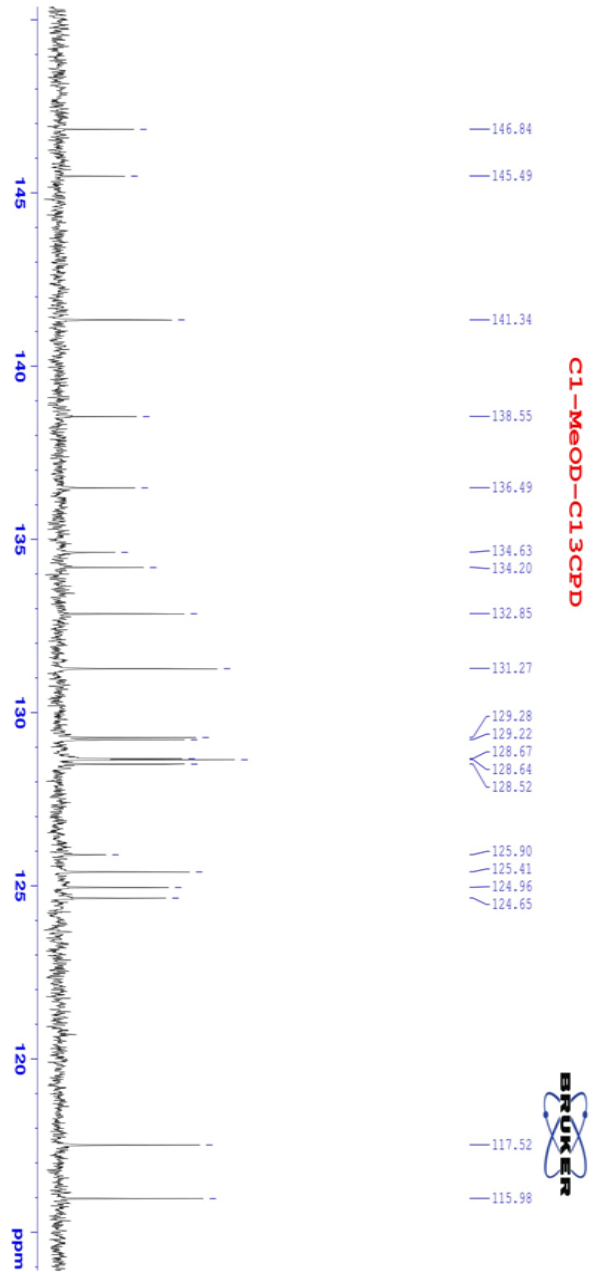

# $^{13}\text{C-NMR}$

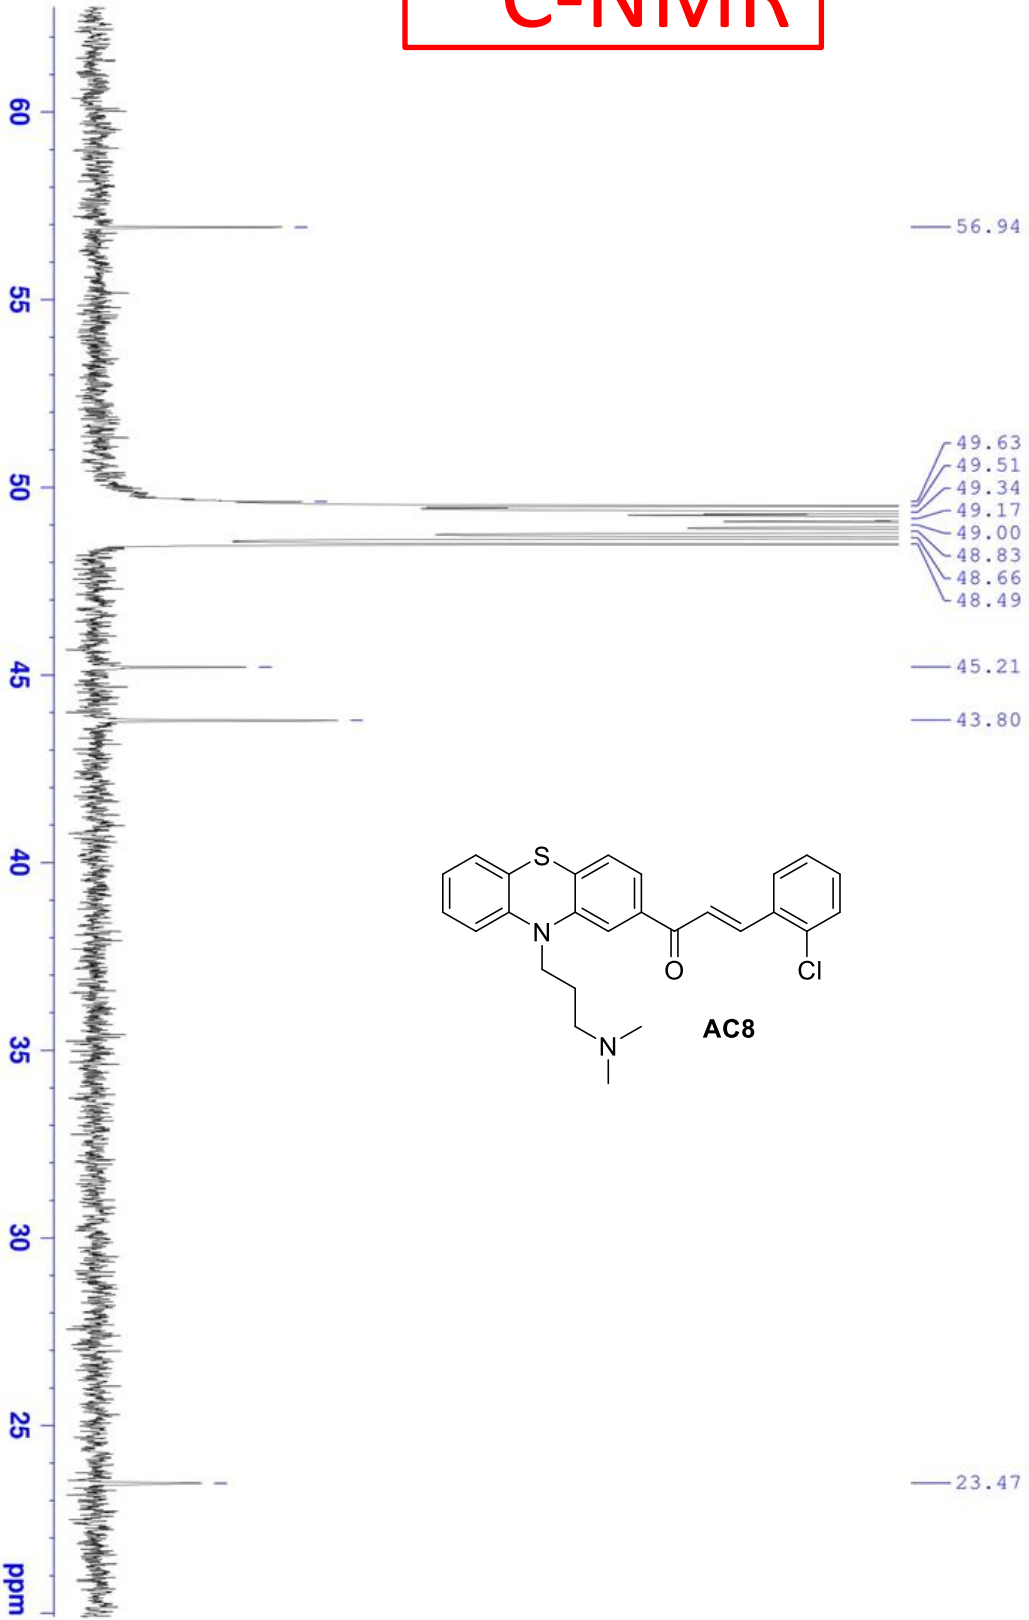

CDCl<sub>3</sub>-MeOD-CDCl<sub>3</sub>

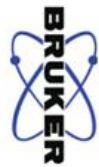

# IR

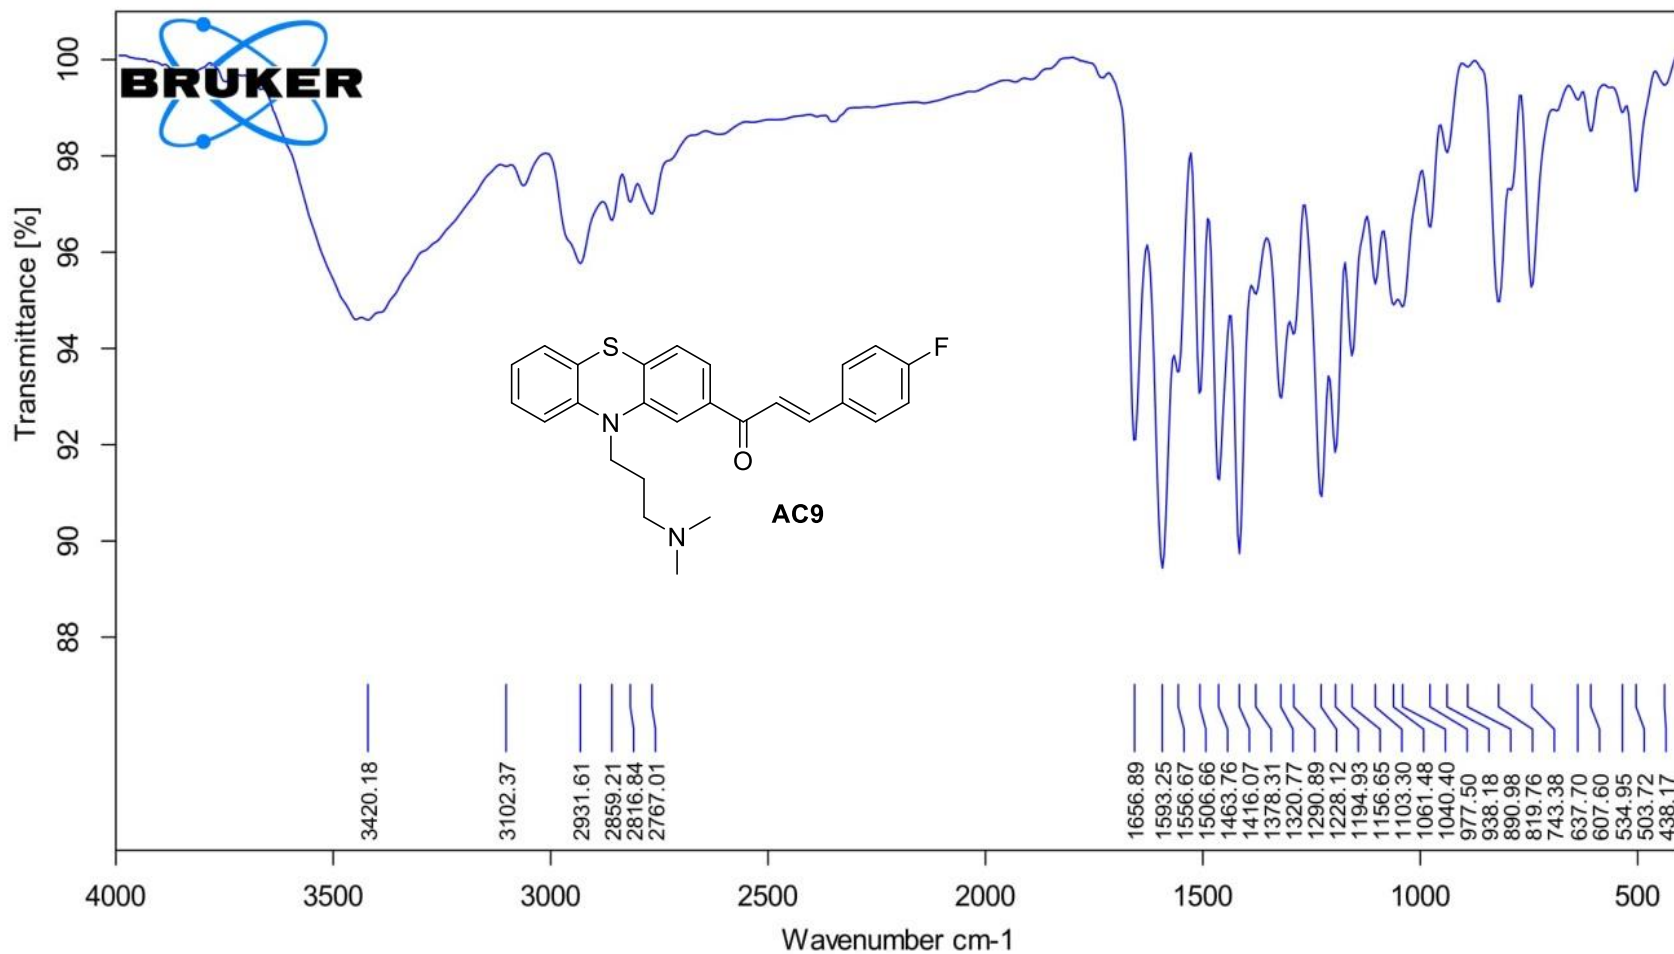



# MS

## Qualitative Analysis Report

|                               |                       |                       |                             |
|-------------------------------|-----------------------|-----------------------|-----------------------------|
| <b>Data Filename</b>          | 09-AC9.d              | <b>Sample Name</b>    | 09-AC9                      |
| <b>Sample Type</b>            | Sample                | <b>Position</b>       | P2-B2                       |
| <b>Instrument Name</b>        | Instrument 1          | <b>User Name</b>      |                             |
| <b>Acq Method</b>             | Cot ngan - MSMS_Pos.m | <b>Acquired Time</b>  | 22/08/2020 11:22:38 AM      |
| <b>IRM Calibration Status</b> | Success               | <b>DA Method</b>      | COTNGAN.M.m                 |
| <b>Comment</b>                |                       |                       |                             |
| <b>Sample Group</b>           |                       | <b>Info.</b>          |                             |
| <b>Stream Name</b>            | LC 1                  | <b>Acquisition SW</b> | 6200 series TOF/6500 series |
|                               |                       | <b>Version</b>        | Q-TOF B.06.01 (B6172 SP1)   |

### User Chromatograms

Fragmentor Voltage 140 Collision Energy 0 Ionization Mode ESI

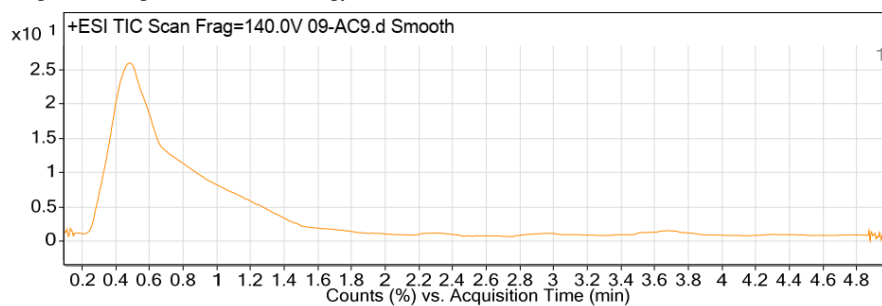

### User Spectra

Fragmentor Voltage 140 Collision Energy 0 Ionization Mode ESI

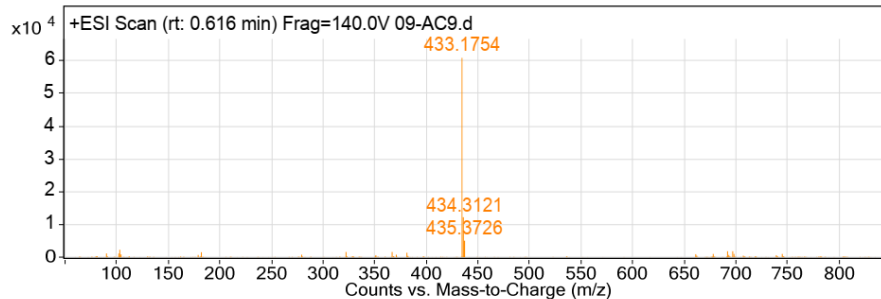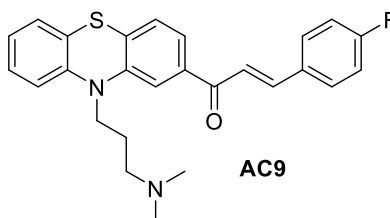

--- End Of Report ---

# MS

+ESI Scan (rt: 0.616 min) Fraa=140.0V BDE 4.d

|               |          |             |                      |                 |              |                        |                        |
|---------------|----------|-------------|----------------------|-----------------|--------------|------------------------|------------------------|
| Sample Name   | 09-AC9   | Position    | P2-B2                | Instrument Name | Instrument 1 | User Name              |                        |
| Inj Vol       | 2        | InjPosition |                      | SampleType      | Sample       | IRM Calibration Status | Success                |
| Data Filename | 09-AC9.d | ACQ Method  | Cot ngan - MSMS_Pos. | Comment         |              | Acquired Time          | 22/08/2020 11:22:38 AM |

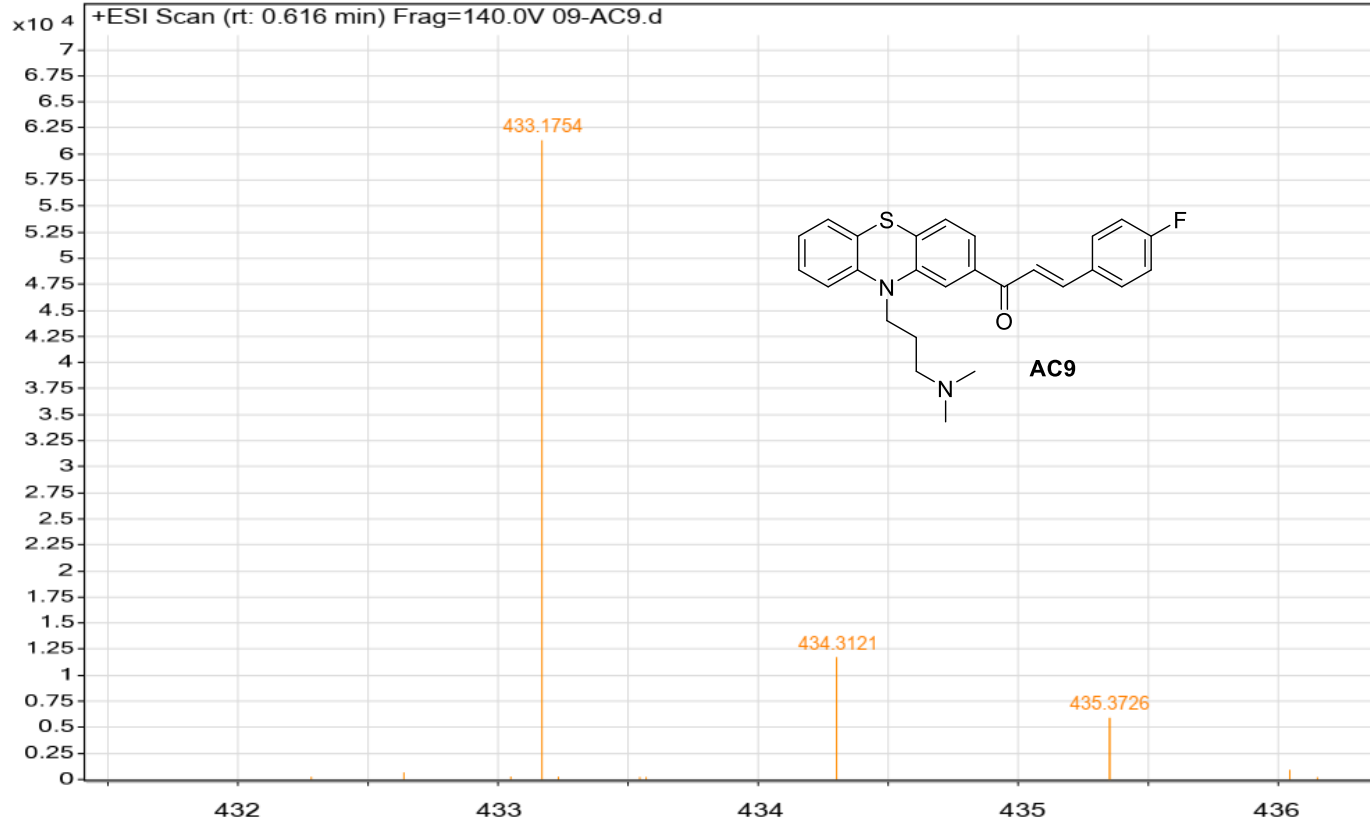

# <sup>1</sup>H-NMR

C11-MeOD-1H

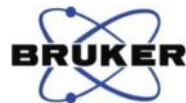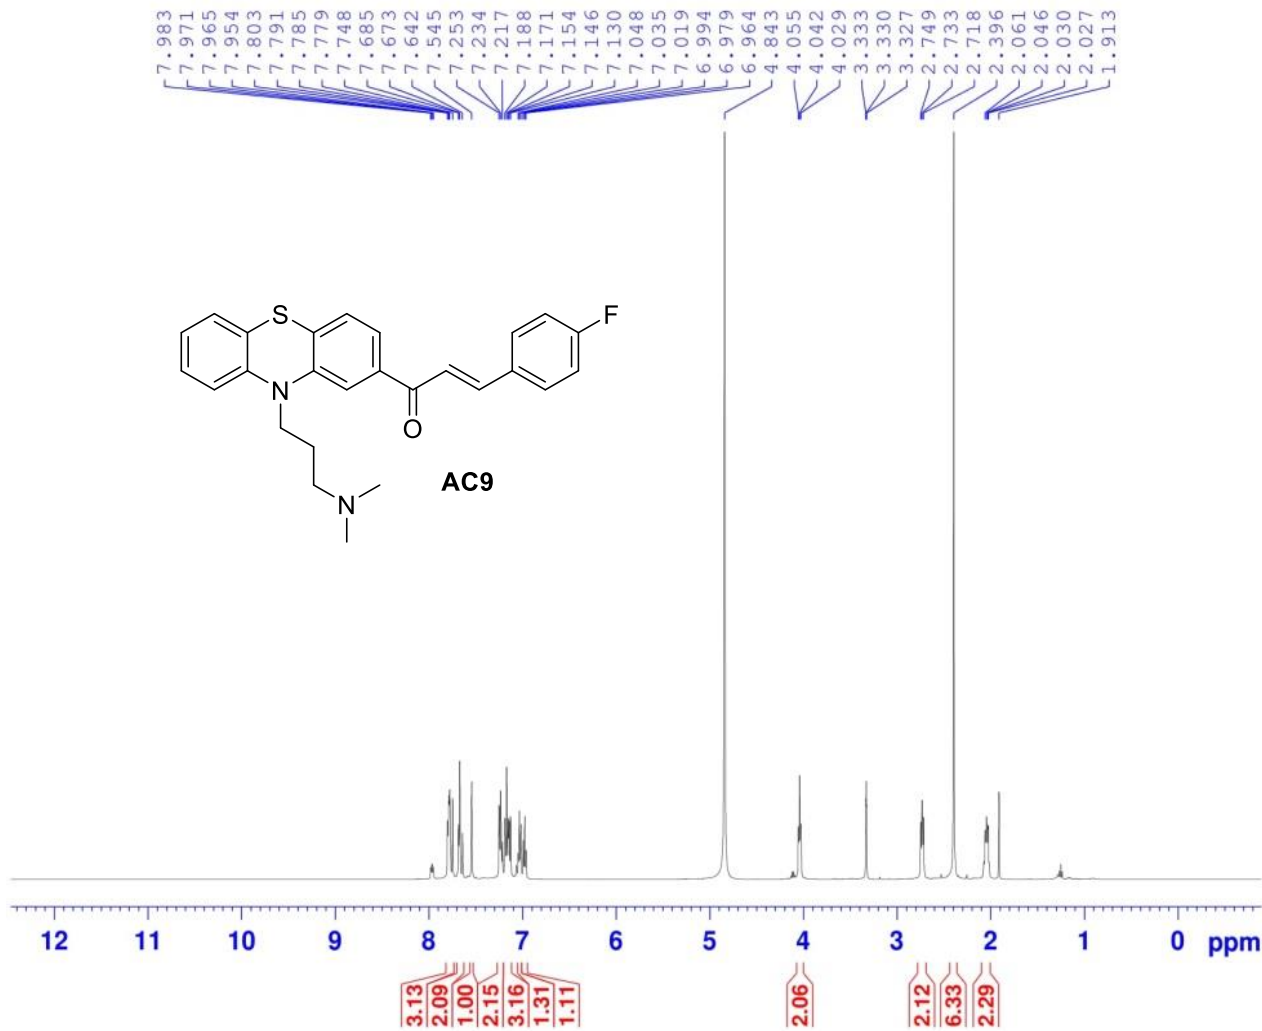

Current Data Parameters  
NAME 114DAO\_C11  
EXPNO 1  
PROCNO 1

F2 - Acquisition Parameters  
Date\_ 20170704  
Time 11.25  
INSTRUM spect  
PROBHD 5 mm PABBO BB/  
PULPROG zg30  
TD 65536  
SOLVENT MeOD  
NS 16  
DS 2  
SWH 10000.000 Hz  
FIDRES 0.152588 Hz  
AQ 3.2767999 sec  
RG 79.36  
DW 50.000 usec  
DE 6.50 usec  
TE 303.0 K  
D1 1.00000000 sec  
TD0 1

===== CHANNEL f1 =====  
SFO1 500.2030889 MHz  
NUC1 1H  
P1 10.00 usec  
PLW1 22.00000000 W

F2 - Processing parameters  
SI 65536  
SF 500.2000016 MHz  
WDW EM  
SSB 0  
LB 0.30 Hz  
GB 0  
PC 1.00

# <sup>1</sup>H-NMR

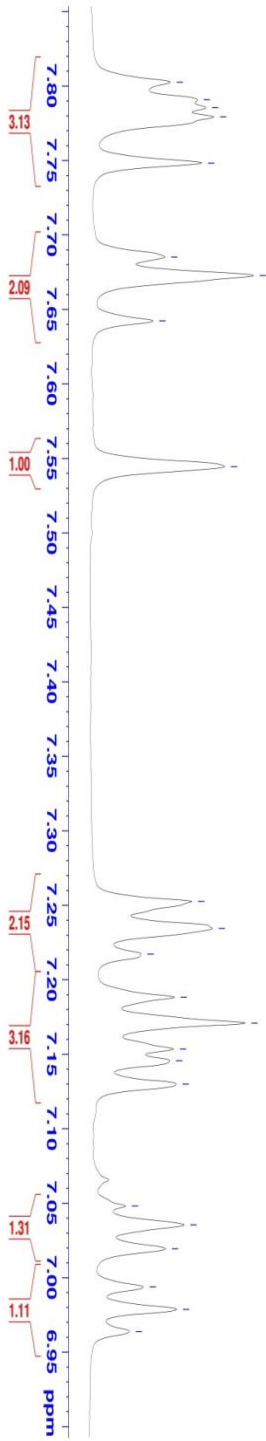

7.803  
7.791  
7.785  
7.779  
7.748

7.685  
7.673  
7.642

7.545

C11-MeOD-1H

7.253  
7.234  
7.217

7.188  
7.171  
7.154  
7.146  
7.130

7.048  
7.035  
7.019  
6.994  
6.979  
6.964

BRUKER

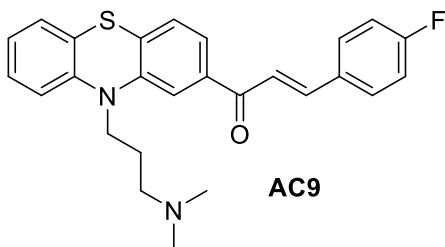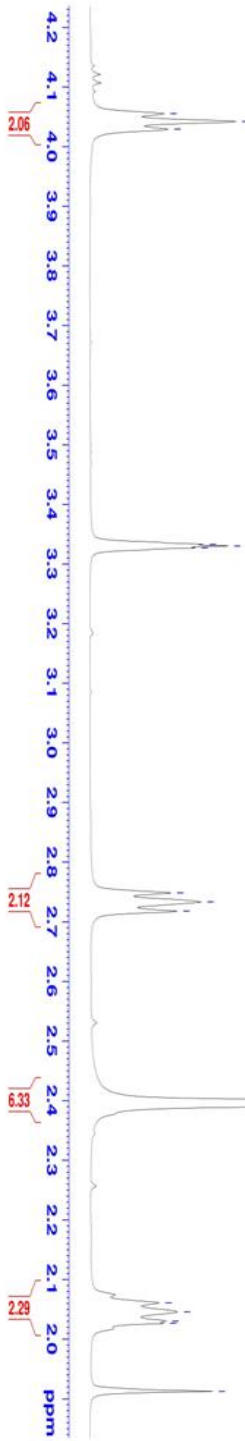

4.055  
4.042  
4.029

3.333  
3.330  
3.327

C11-MeOD-1H

2.749  
2.733  
2.718

2.396

2.061  
2.046  
2.030  
2.027

1.913

BRUKER

# <sup>13</sup>C-NMR

C11-MeOD-C13CPD

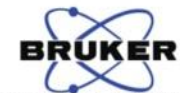

Current Data Parameters  
NAME 113DAO\_C11  
EXPNO 2  
PROCNO 1

F2 - Acquisition Parameters  
Date\_ 20170705  
Time 14.39  
INSTRUM spect  
PROBHD 5 mm PABBO BB/  
PULPROG zgpg30  
TD 65536  
SOLVENT MeOD  
NS 128  
DS 4  
SWH 29761.904 Hz  
FIDRES 0.454131 Hz  
AQ 1.1010048 sec  
RG 198.57  
DW 16.800 usec  
DE 6.50 usec  
TE 303.0 K  
D1 2.00000000 sec  
D11 0.03000000 sec  
TD0 1

===== CHANNEL f1 =====  
SFO1 125.7879670 MHz  
NUC1 13C  
P1 10.00 usec  
PLW1 88.00000000 W

===== CHANNEL f2 =====  
SFO2 500.2020008 MHz  
NUC2 1H  
CPDPRG[2] waltz16  
PCPD2 80.00 usec  
PLW2 22.00000000 W  
PLW12 0.34375000 W  
PLW13 0.22000000 W

F2 - Processing parameters  
SI 32768  
SF 125.7752168 MHz  
WDW EM  
SSB 0  
LB 1.00 Hz  
GB 0  
PC 1.40

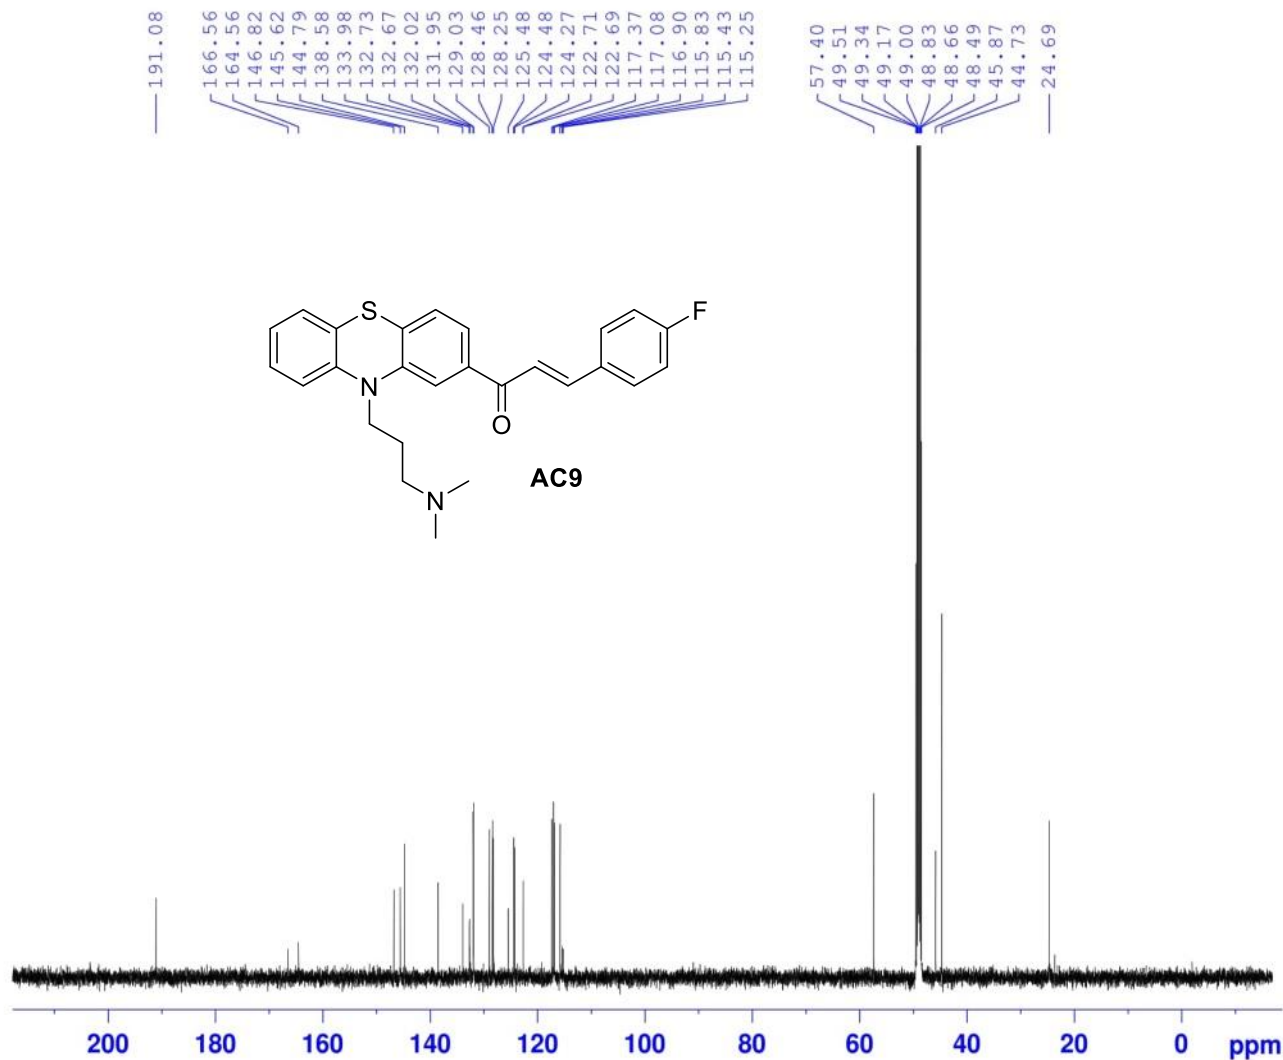

# $^{13}\text{C}$ -NMR

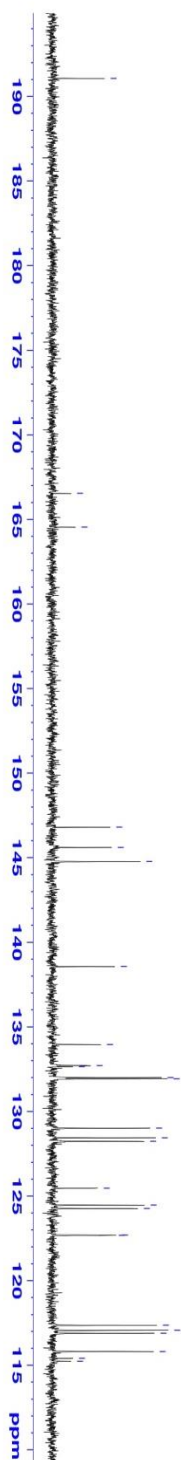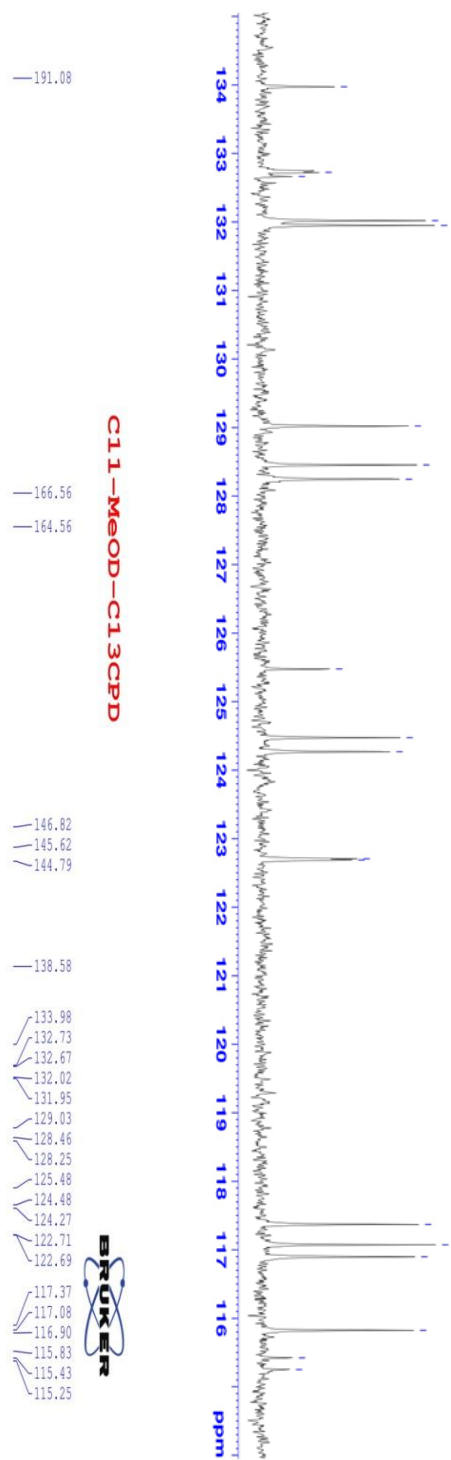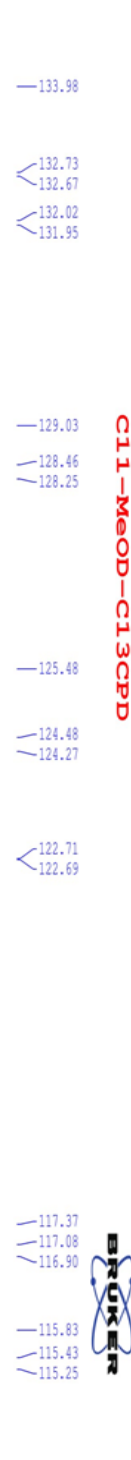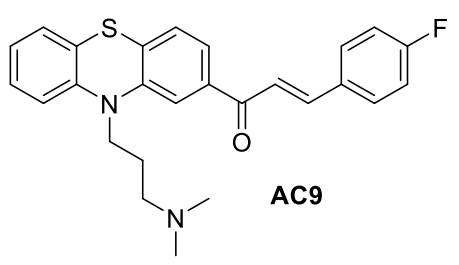

C11-MeOD-C13CPD

C11-MeOD-C13CPD

BRUKER

BRUKER

# $^{13}\text{C}$ -NMR

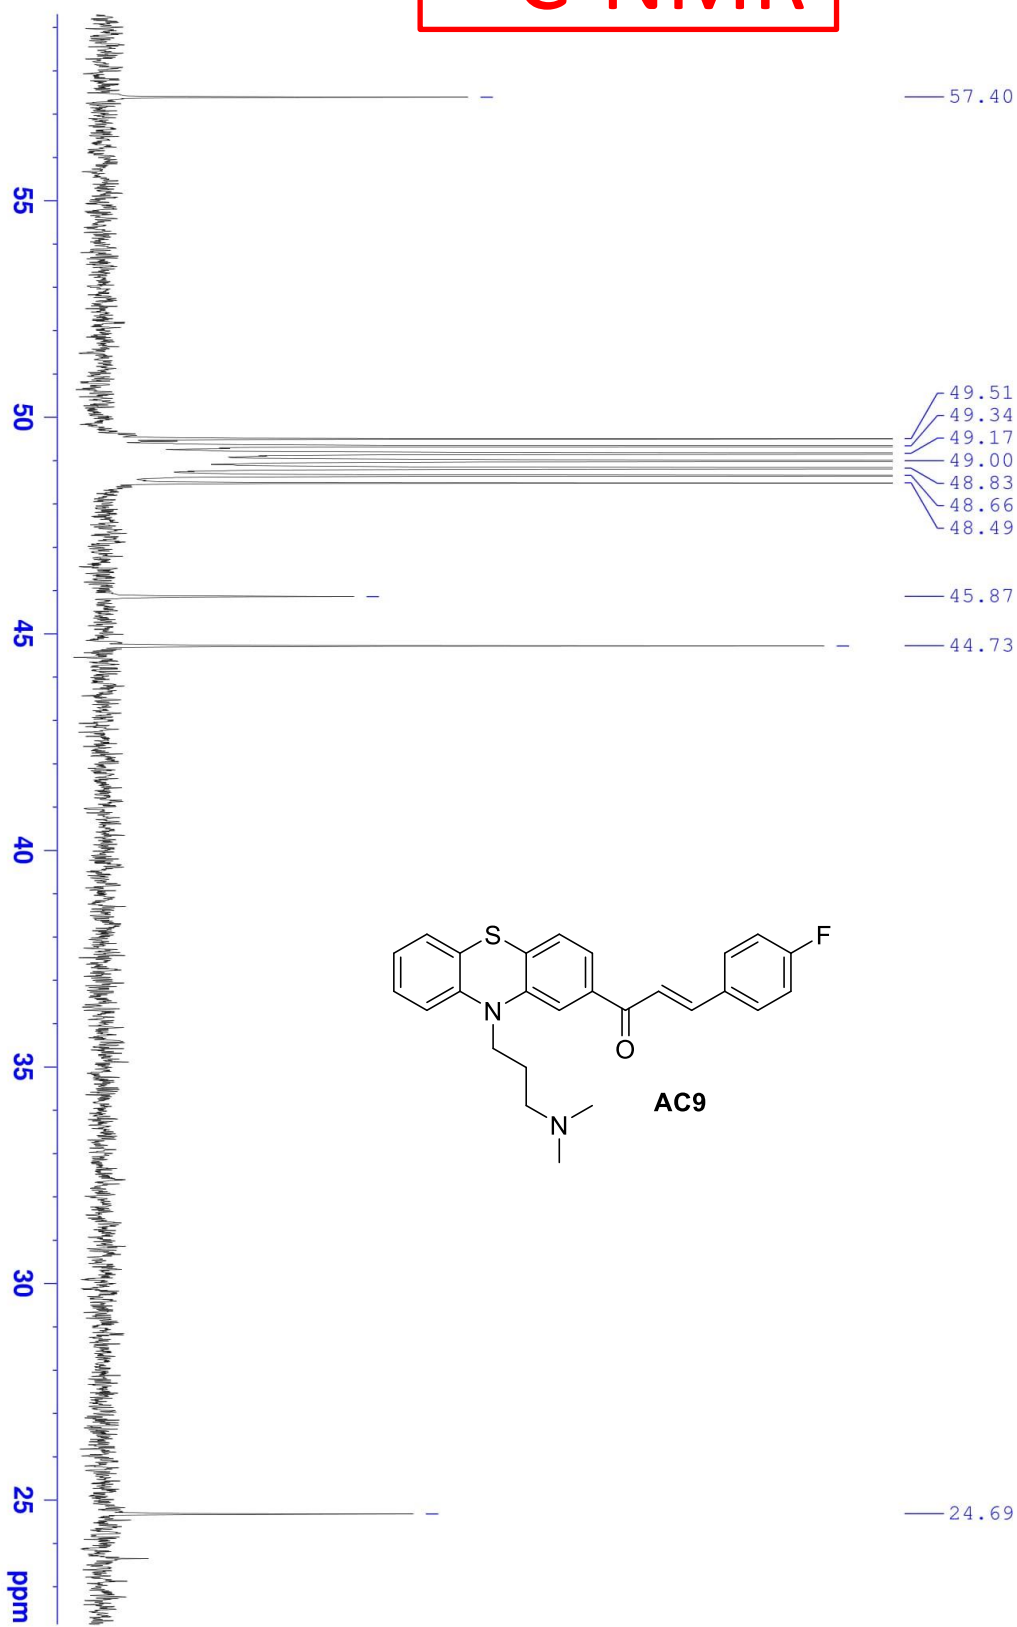

C11-MeOD-C13CPD

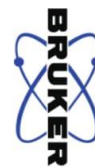

IR

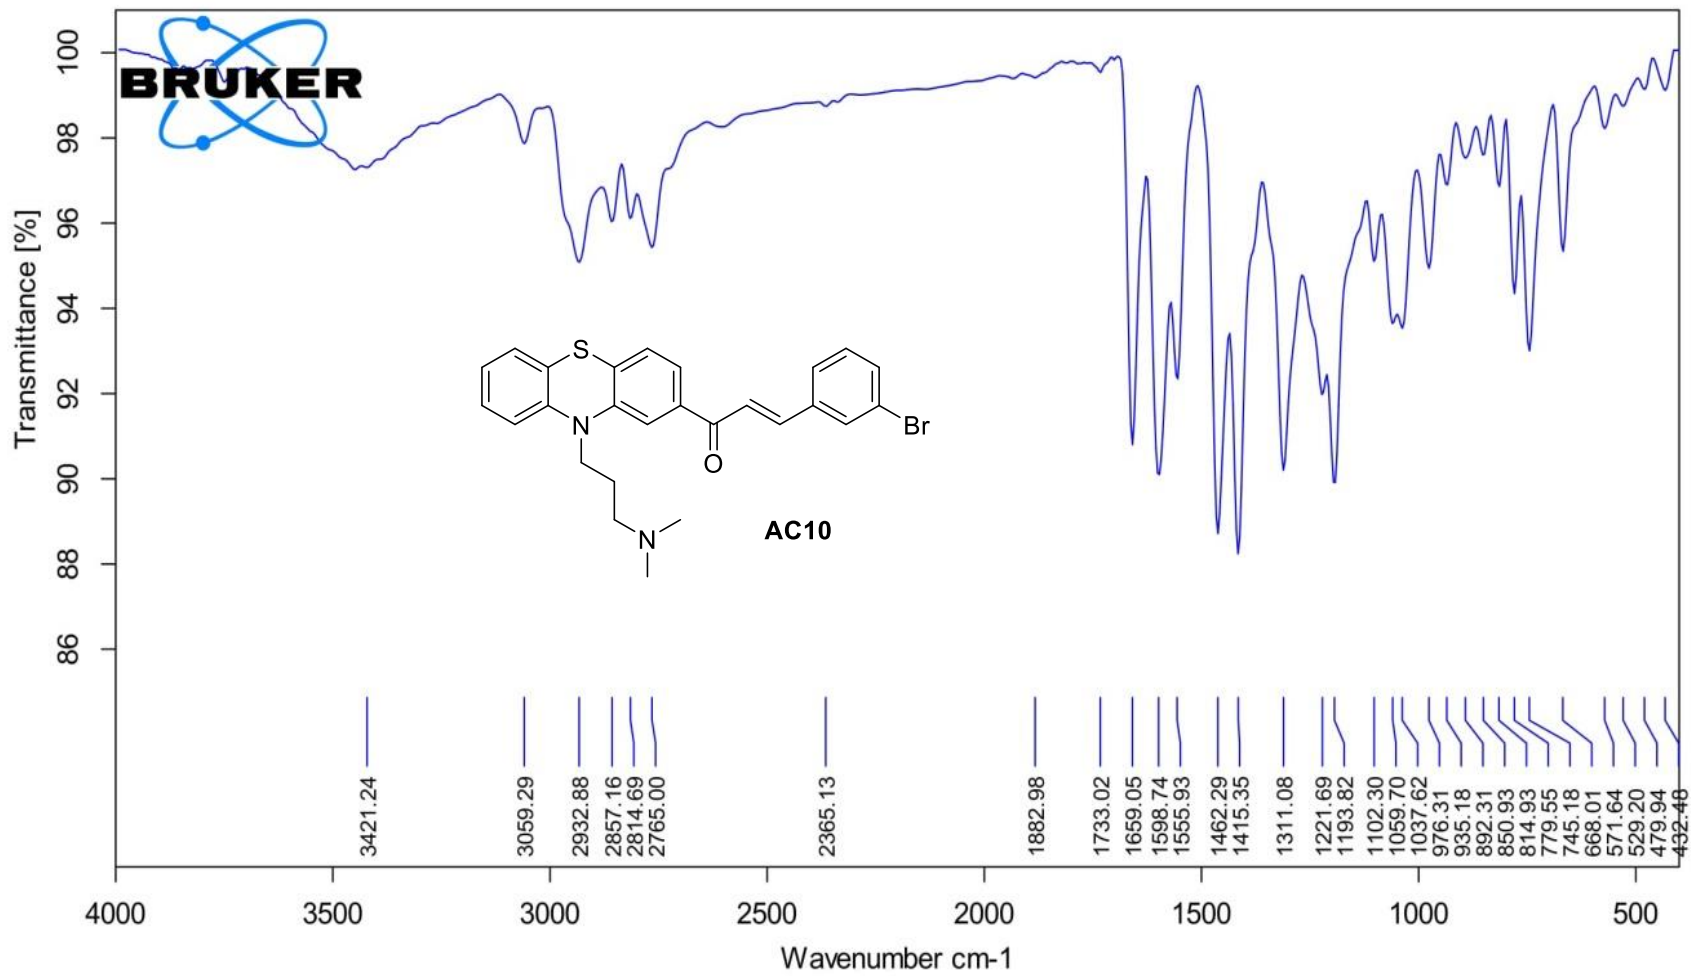

|                                       |     |                              |           |
|---------------------------------------|-----|------------------------------|-----------|
| E:\OPUS 7\2017\THANG 7\20170714\C14.0 | C14 | Tensor 27 - Bruker - Germany | 7/14/2017 |
|---------------------------------------|-----|------------------------------|-----------|



# MS

## Qualitative Analysis Report

|                               |                       |                       |                             |
|-------------------------------|-----------------------|-----------------------|-----------------------------|
| <b>Data Filename</b>          | 10-AC10.d             | <b>Sample Name</b>    | 10-AC10                     |
| <b>Sample Type</b>            | Sample                | <b>Position</b>       | P2-C1                       |
| <b>Instrument Name</b>        | Instrument 1          | <b>User Name</b>      |                             |
| <b>Acq Method</b>             | Cot ngan - MSMS_Pos.m | <b>Acquired Time</b>  | 22/08/2020 11:30:09 AM      |
| <b>IRM Calibration Status</b> | Success               | <b>DA Method</b>      | COTNGAN.M.m                 |
| <b>Comment</b>                |                       |                       |                             |
| <b>Sample Group</b>           |                       | <b>Info.</b>          |                             |
| <b>Stream Name</b>            | LC 1                  | <b>Acquisition SW</b> | 6200 series TOF/6500 series |
|                               |                       | <b>Version</b>        | Q-TOF B.06.01 (B6172 SP1)   |

### User Chromatograms

Fragmentor Voltage 140 Collision Energy 0 Ionization Mode ESI

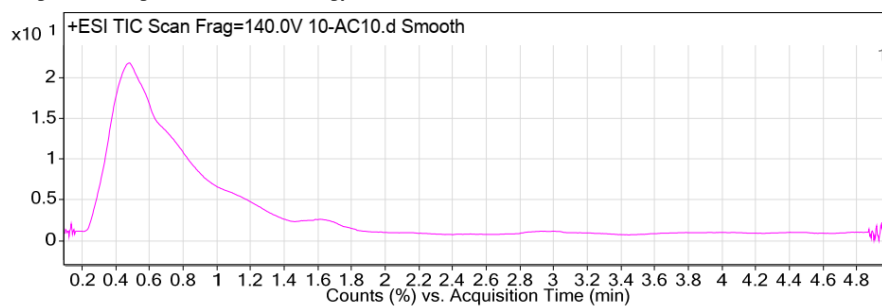

### User Spectra

Fragmentor Voltage 140 Collision Energy 0 Ionization Mode ESI

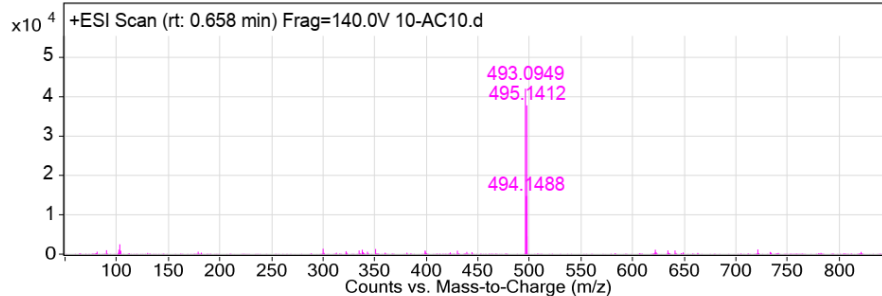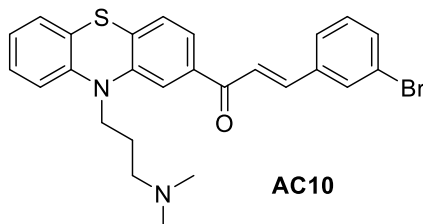

--- End Of Report ---

# MS

|               |           |             |                      |                 |              |                        |                        |
|---------------|-----------|-------------|----------------------|-----------------|--------------|------------------------|------------------------|
| Sample Name   | 10-AC10   | Position    | P2-C1                | Instrument Name | Instrument 1 | User Name              |                        |
| Inj Vol       | 2         | InjPosition |                      | SampleType      | Sample       | IRM Calibration Status | Success                |
| Data Filename | 10-AC10.d | ACQ Method  | Cot ngan - MSMS_Pos. | Comment         |              | Acquired Time          | 22/08/2020 11:30:09 AM |

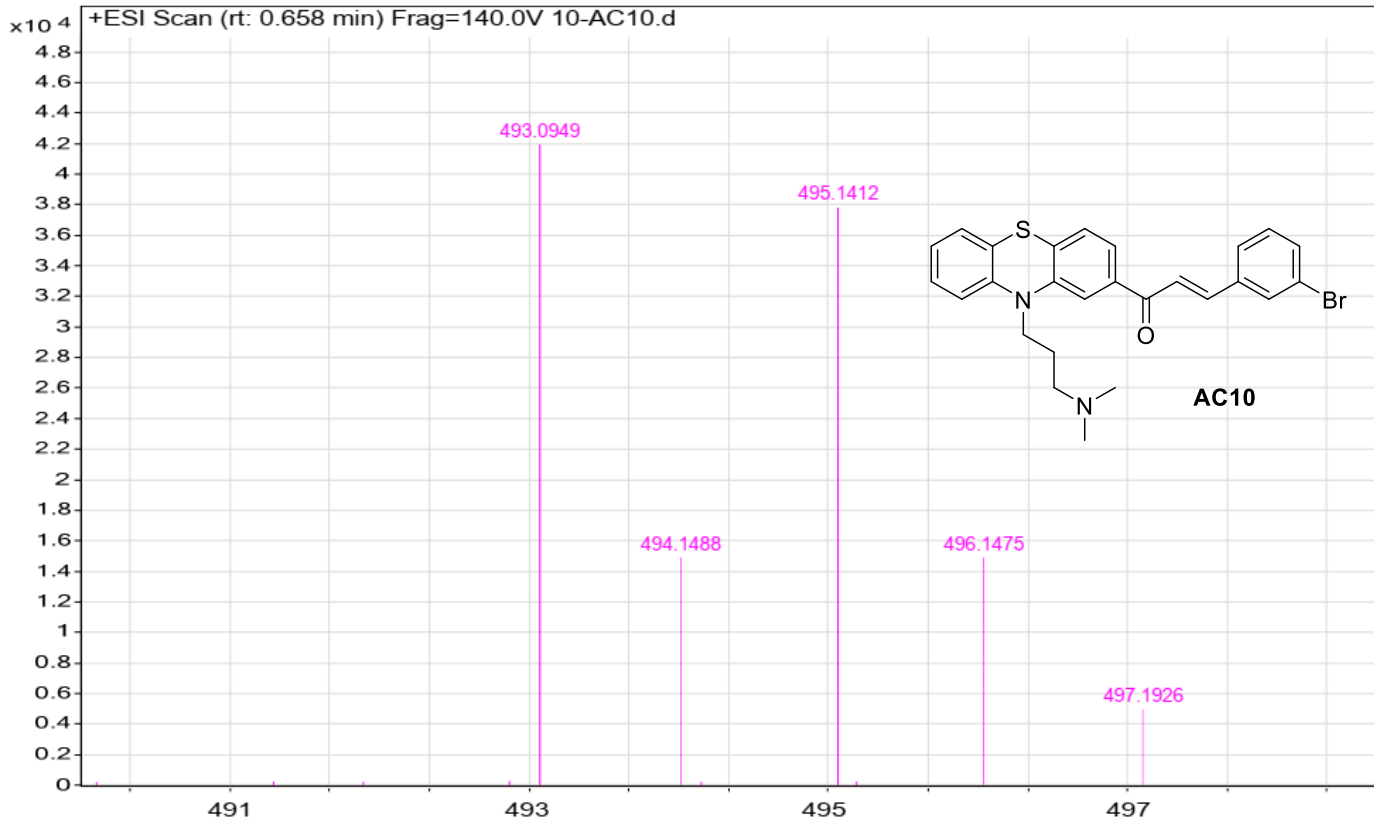

# <sup>1</sup>H-NMR

C14-MeOD-1H

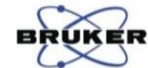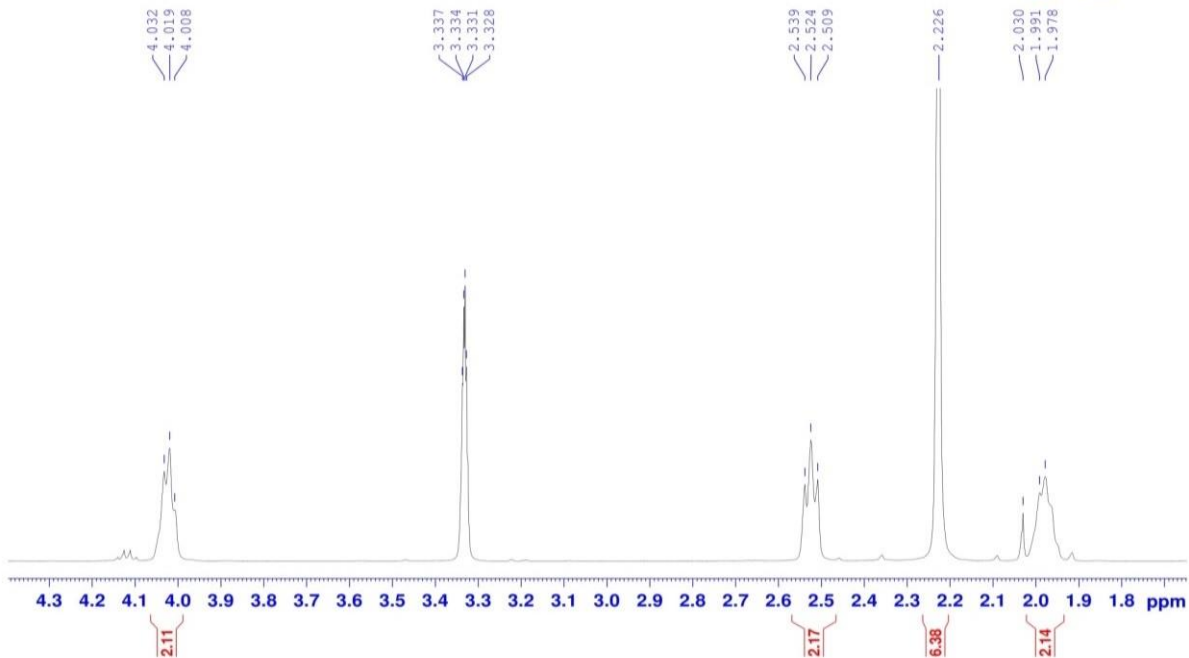

C14-MeOD-1H

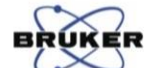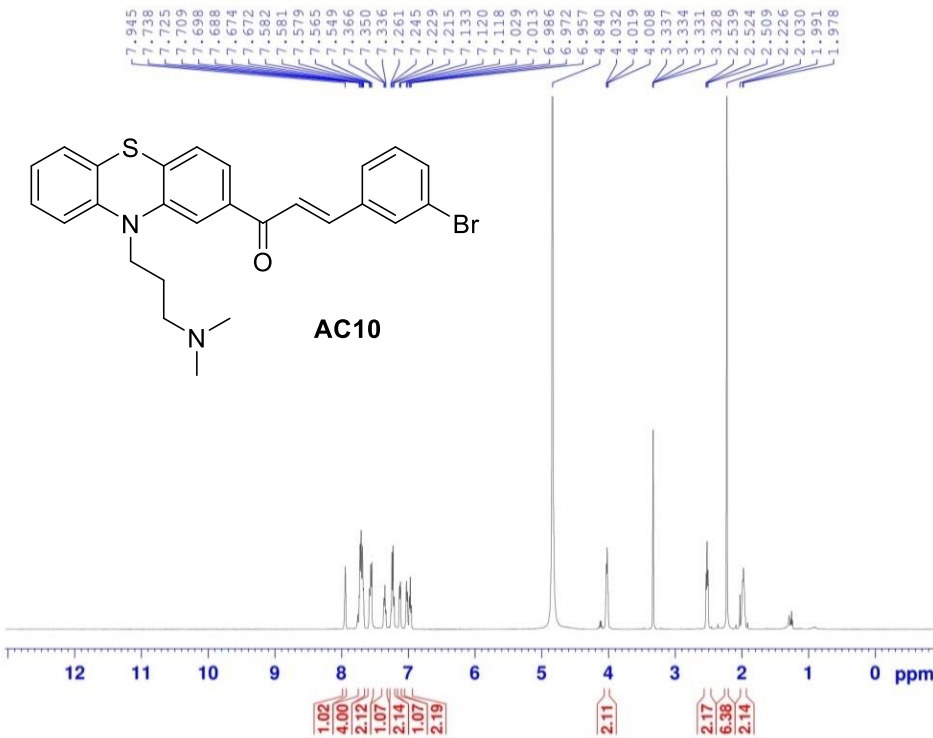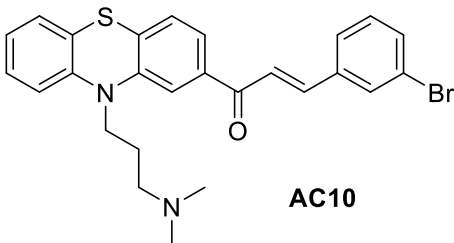

Current Data Parameters

NAME 114DAO\_C14  
 EXPNO 1  
 PROCNO 1

F2 - Acquisition Parameters

Date\_ 20170704  
 Time 11.35  
 INSTRUM spect  
 PROBHD 5 mm PABBO BB/  
 PULPROG zg30  
 TD 65536  
 SOLVENT MeOD  
 NS 16  
 DS 2  
 SWH 10000.000 Hz  
 FIDRES 0.152588 Hz  
 AQ 3.2767999 sec  
 RE 97.76  
 DW 50.000 usec  
 DE 6.50 usec  
 TE 303.0 K  
 D1 1.00000000 sec  
 TDO 1

===== CHANNEL f1 =====

SFO1 500.2030889 MHz  
 NUC1 1H  
 P1 10.00 usec  
 PLW1 22.00000000 W

F2 - Processing parameters

SI 65536  
 SF 500.2000000 MHz  
 WDW EM  
 SSB 0  
 LB 0.30 Hz  
 GB 0  
 PC 1.00

# <sup>1</sup>H-NMR

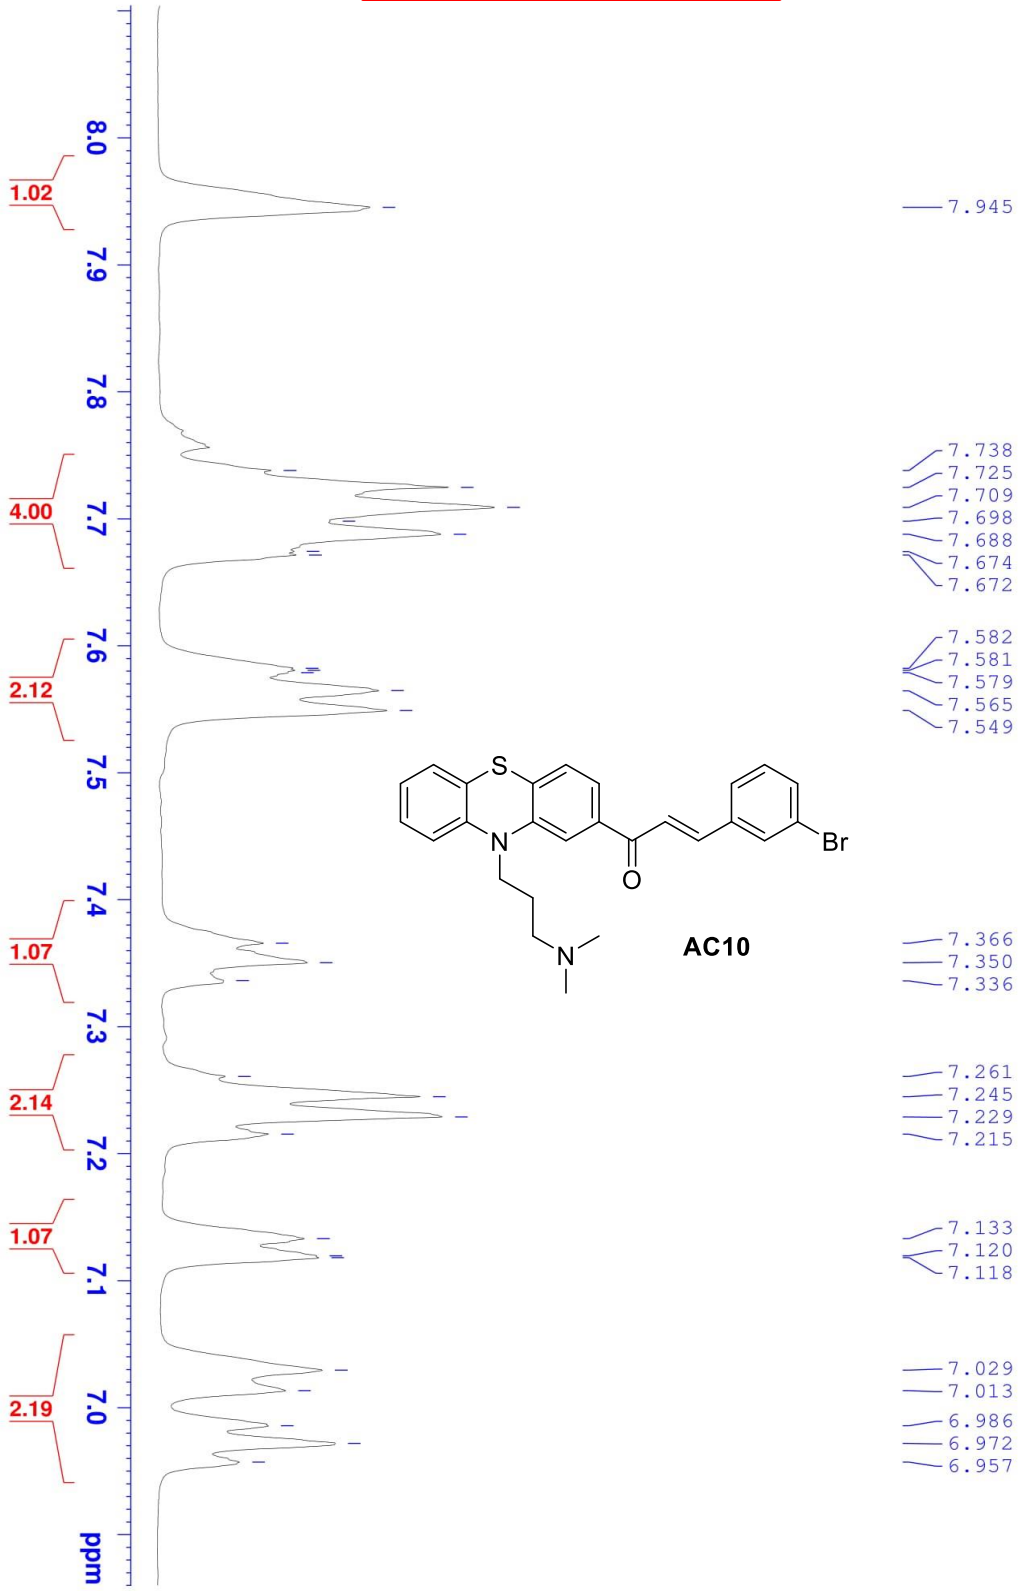

C14-MeOD-1H

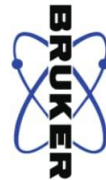

# <sup>13</sup>C-NMR

C14-MeOD-C13CPD

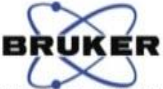

Current Data Parameters  
NAME 114DAO\_C14  
EXPNO 2  
PROCNO 1

F2 - Acquisition Parameters  
Date\_ 20170705  
Time 15.02  
INSTRUM spect  
PROBHD 5 mm PABBO BB/  
PULPROG zgpg30  
TD 65536  
SOLVENT MeOD  
NS 256  
DS 4  
SWH 29761.904 Hz  
FIDRES 0.454131 Hz  
AQ 1.1010048 sec  
RG 198.57  
DW 16.800 usec  
DE 6.50 usec  
TE 303.0 K  
D1 2.00000000 sec  
D11 0.03000000 sec  
TD0 1

----- CHANNEL f1 -----  
SFO1 125.7879670 MHz  
NUC1 13C  
P1 10.00 usec  
PLW1 88.00000000 W

----- CHANNEL f2 -----  
SFO2 500.2020008 MHz  
NUC2 1H  
CPDPRG[2] waltz16  
PCPD2 80.00 usec  
PLW2 22.00000000 W  
PLW12 0.34375000 W  
PLW13 0.22000000 W

F2 - Processing parameters  
SI 32768  
SF 125.7752156 MHz  
WDW EM  
SSB 0  
LB 1.00 Hz  
GB 0  
PC 1.40

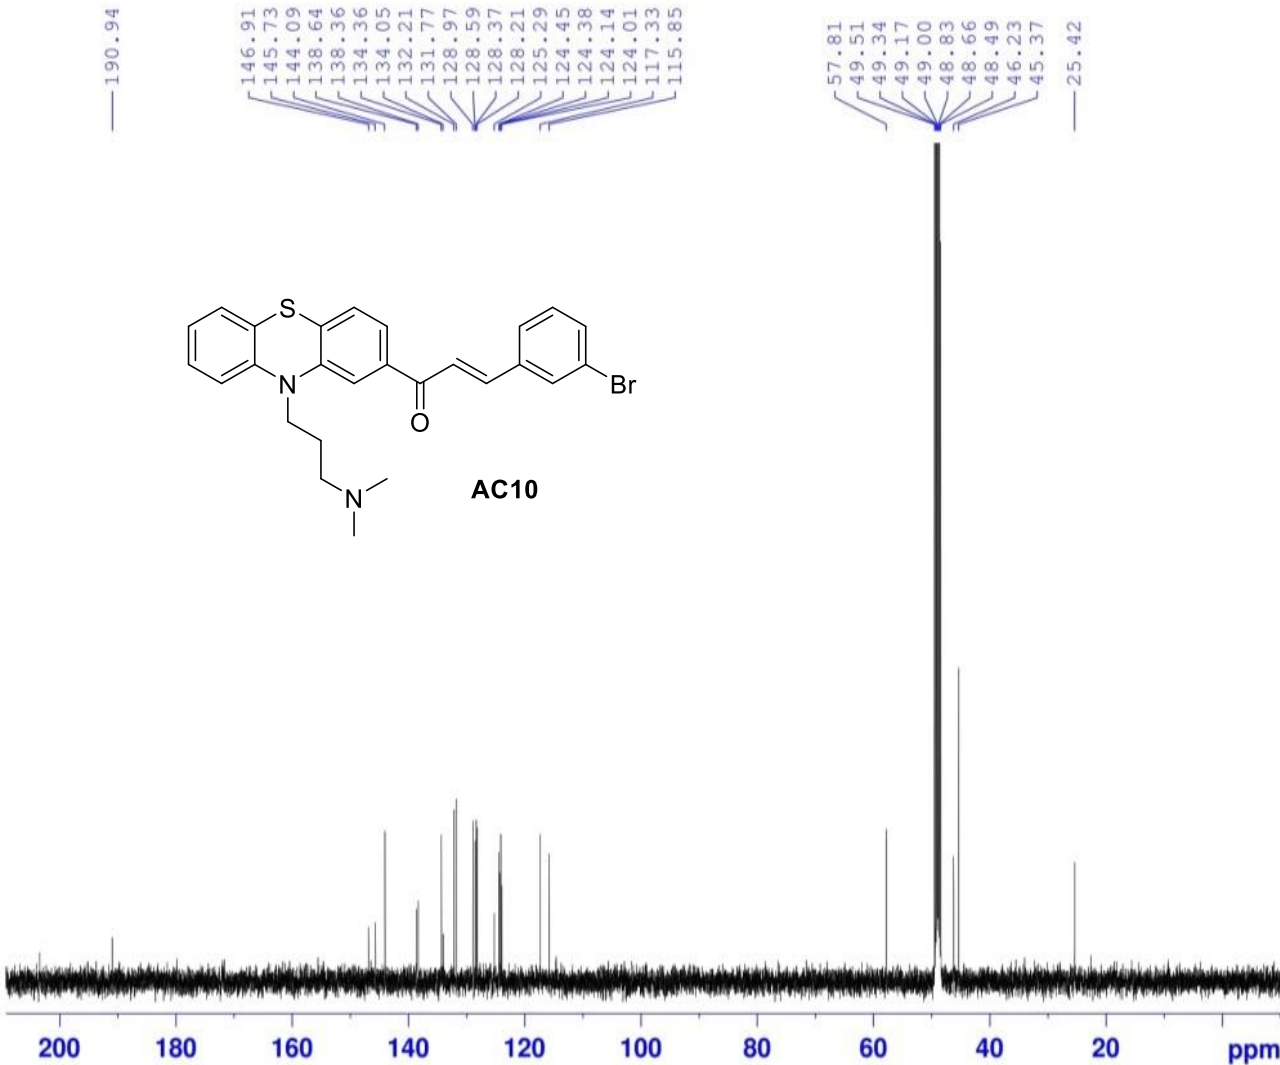

# $^{13}\text{C}$ -NMR

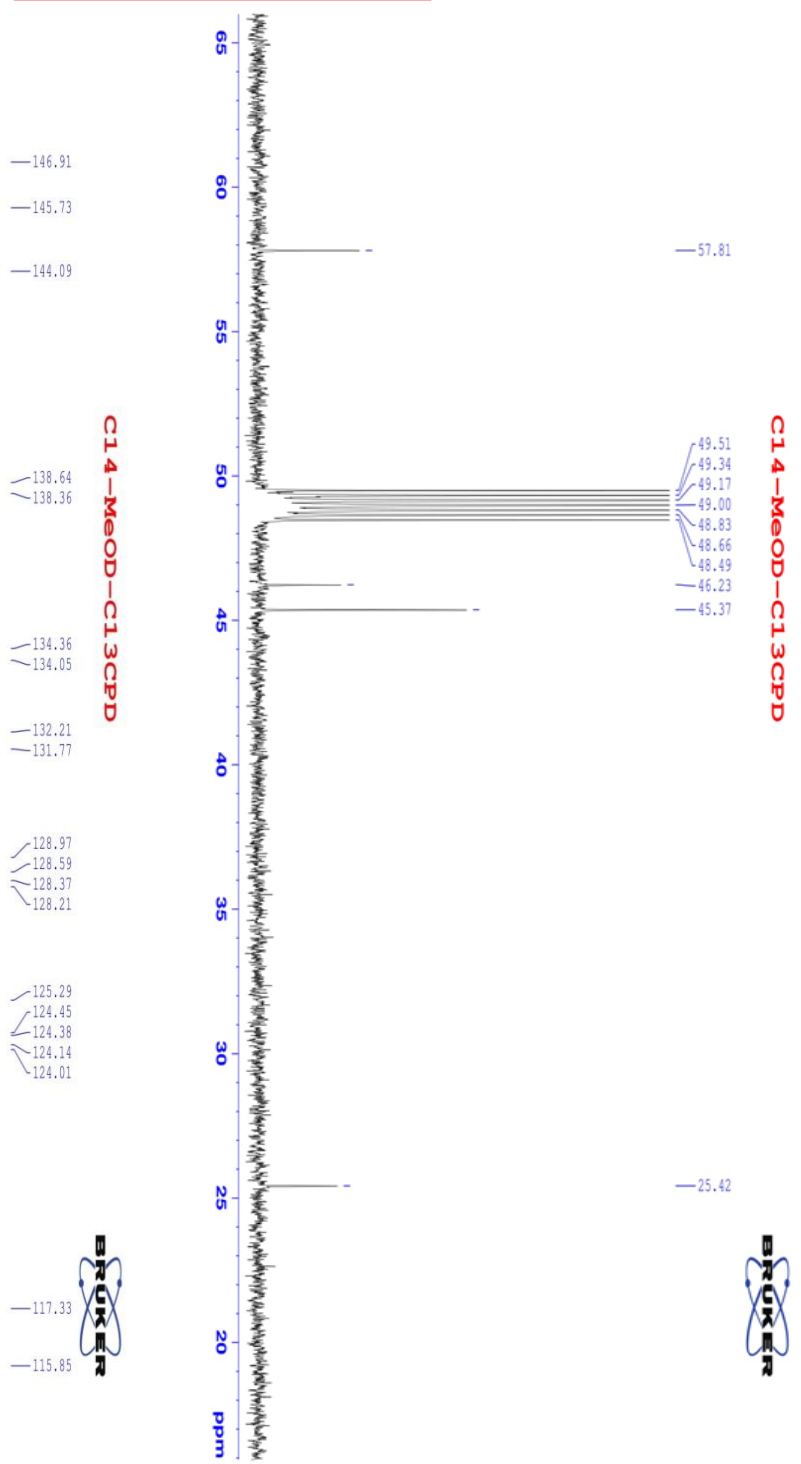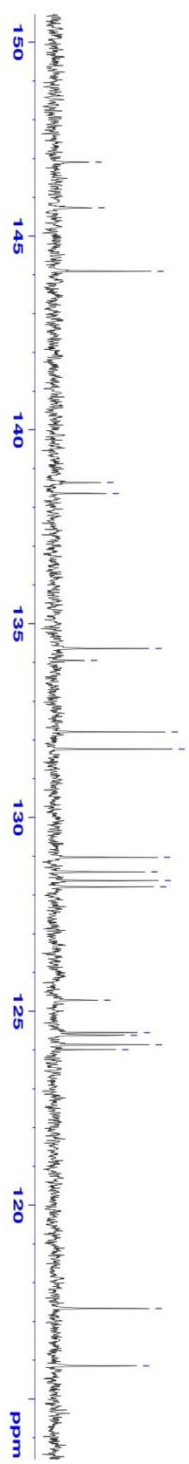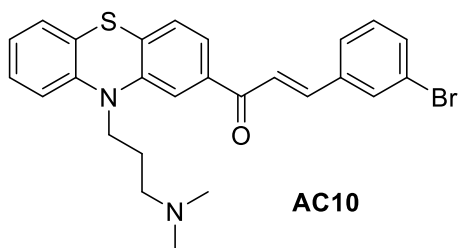

IR

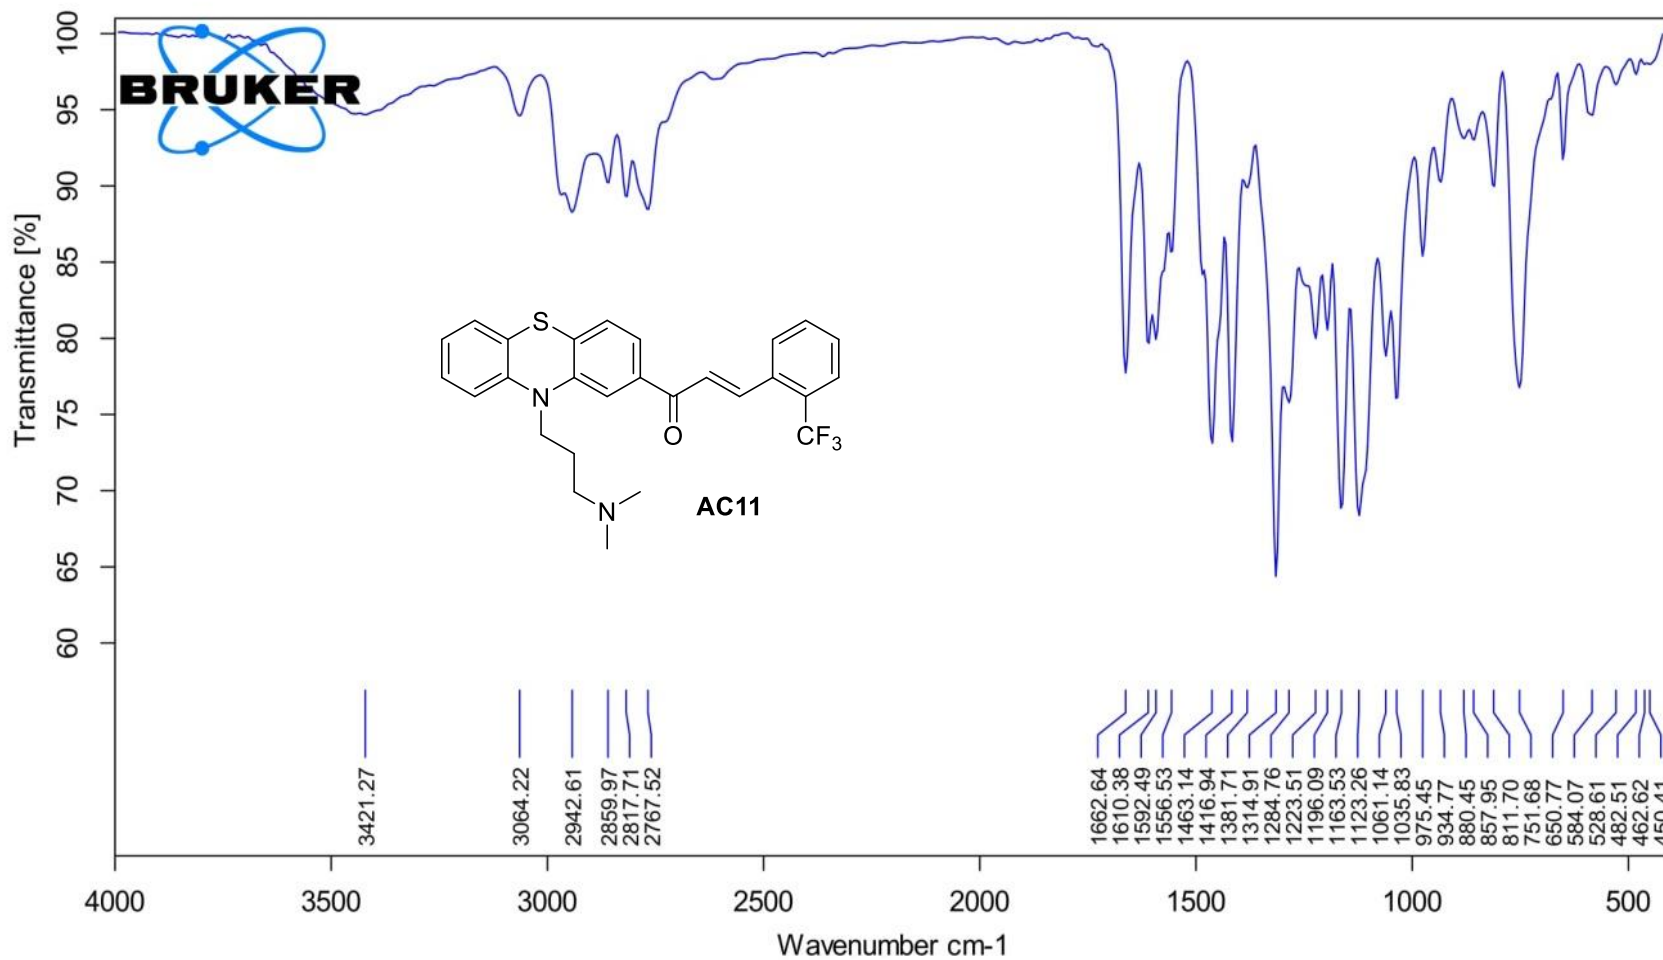

# MS

## Qualitative Analysis Report

|                               |                       |                       |                             |
|-------------------------------|-----------------------|-----------------------|-----------------------------|
| <b>Data Filename</b>          | 11-AC11.d             | <b>Sample Name</b>    | 11-AC11                     |
| <b>Sample Type</b>            | Sample                | <b>Position</b>       | P2-B1                       |
| <b>Instrument Name</b>        | Instrument 1          | <b>User Name</b>      |                             |
| <b>Acq Method</b>             | Cot ngan - MSMS_Pos.m | <b>Acquired Time</b>  | 22/08/2020 11:40:04 AM      |
| <b>IRM Calibration Status</b> | Success               | <b>DA Method</b>      | COTNGAN.M.m                 |
| <b>Comment</b>                |                       |                       |                             |
| <b>Sample Group</b>           |                       | <b>Info.</b>          |                             |
| <b>Stream Name</b>            | LC 1                  | <b>Acquisition SW</b> | 6200 series TOF/6500 series |
|                               |                       | <b>Version</b>        | Q-TOF B.06.01 (B6172 SP1)   |

### User Chromatograms

Fragmentor Voltage 140 Collision Energy 0 Ionization Mode ESI

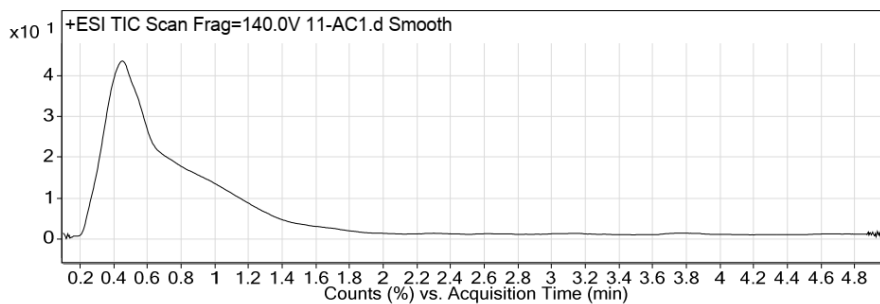

### User Spectra

Fragmentor Voltage 140 Collision Energy 0 Ionization Mode ESI

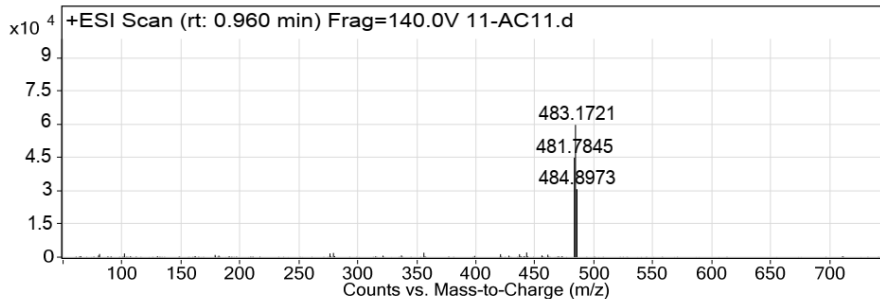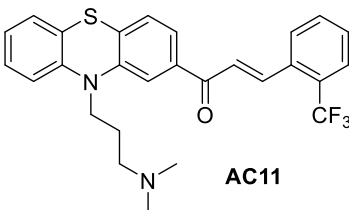

--- End Of Report ---



# MS

|               |           |             |                      |                 |              |                        |                        |
|---------------|-----------|-------------|----------------------|-----------------|--------------|------------------------|------------------------|
| Sample Name   | 11-AC11   | Position    | P2-B1                | Instrument Name | Instrument 1 | User Name              |                        |
| Inj Vol       | 2         | InjPosition |                      | SampleType      | Sample       | IRM Calibration Status | Success                |
| Data Filename | 11-AC11.d | ACQ Method  | Cot ngan - MSMS_Pos. | Comment         |              | Acquired Time          | 22/08/2020 11:40:04 AM |

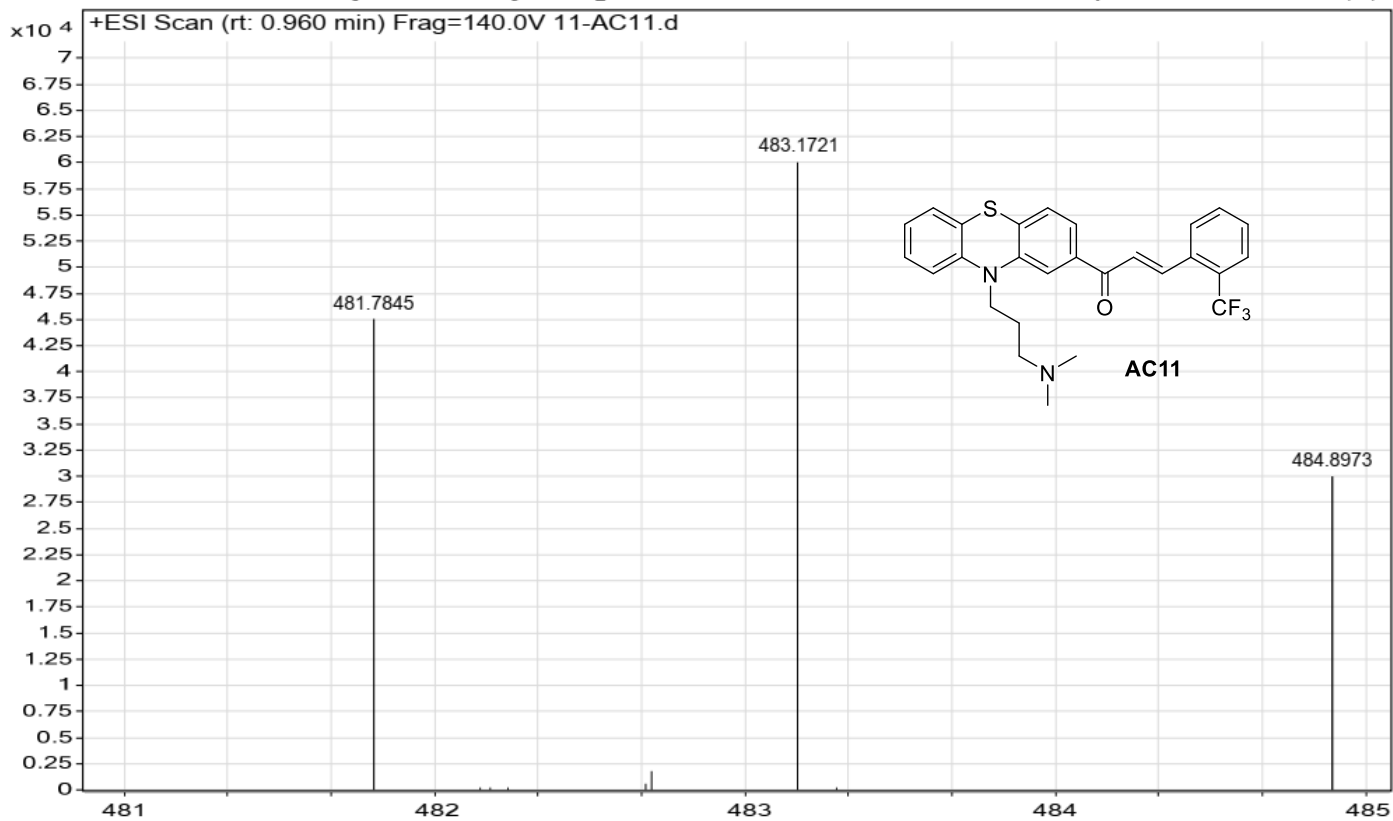

# <sup>1</sup>H-NMR

C15-MeOD-1H

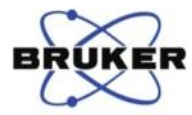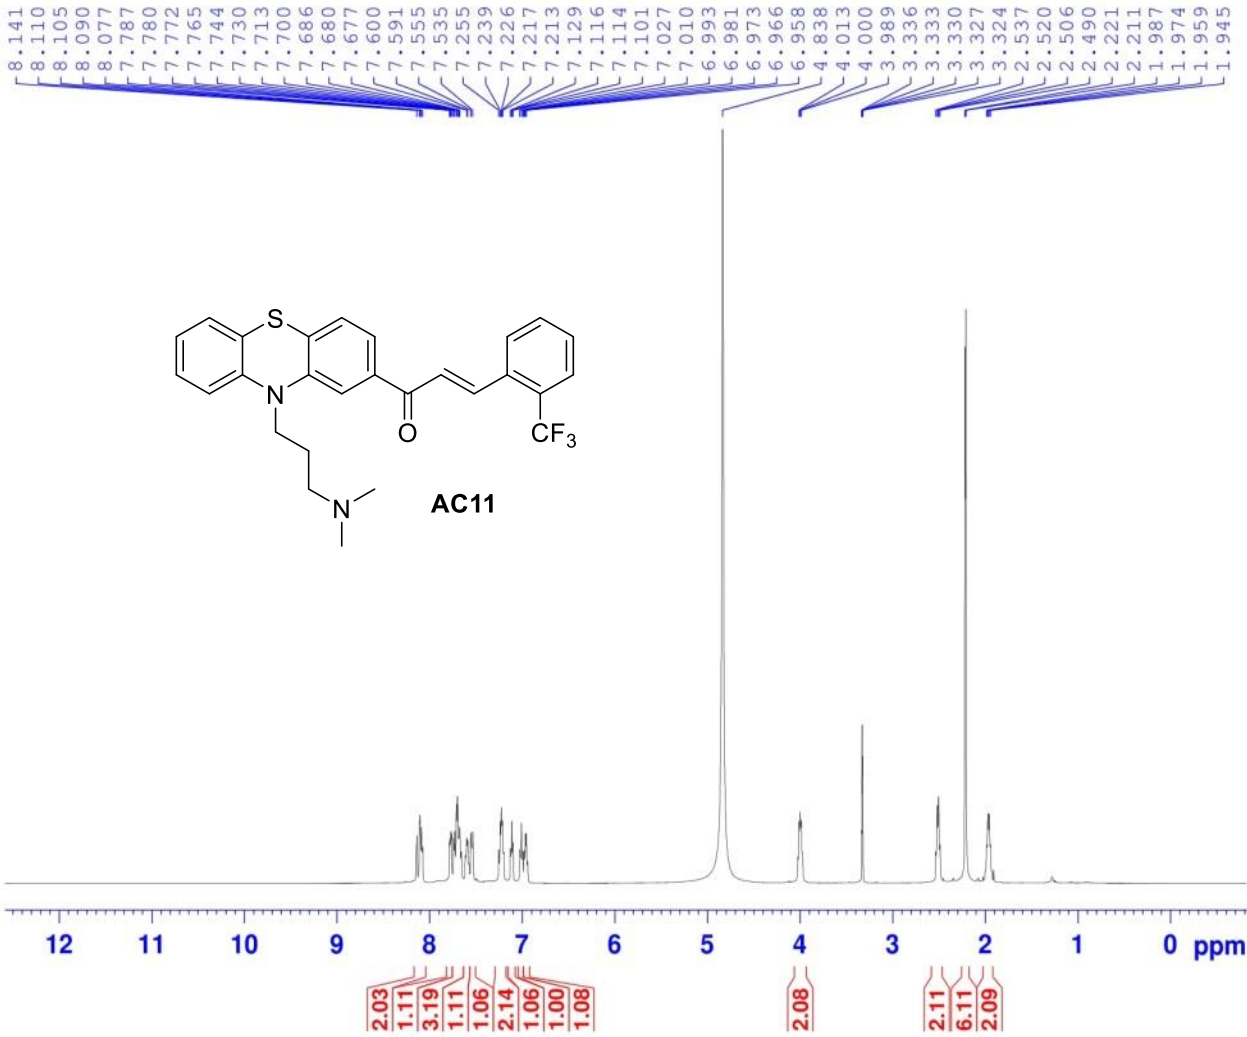

Current Data Parameters  
NAME 113DAO\_C15  
EXPNO 1  
PROCNO 1

F2 - Acquisition Parameters  
Date\_ 20170705  
Time 15.07  
INSTRUM spect  
PROBHD 5 mm PABBO BB/  
PULPROG zg30  
TD 65536  
SOLVENT MeOD  
NS 16  
DS 2  
SWH 10000.000 Hz  
FIDRES 0.152588 Hz  
AQ 3.2767999 sec  
RG 79.36  
DW 50.000 usec  
DE 6.50 usec  
TE 303.0 K  
D1 1.00000000 sec  
TD0 1

==== CHANNEL f1 =====  
SFO1 500.2030889 MHz  
NUC1 1H  
P1 10.00 usec  
PLW1 22.00000000 W

F2 - Processing parameters  
SI 65536  
SF 500.2000011 MHz  
WDW EM  
SSB 0  
LB 0.30 Hz  
GB 0  
PC 1.00

# <sup>1</sup>H-NMR

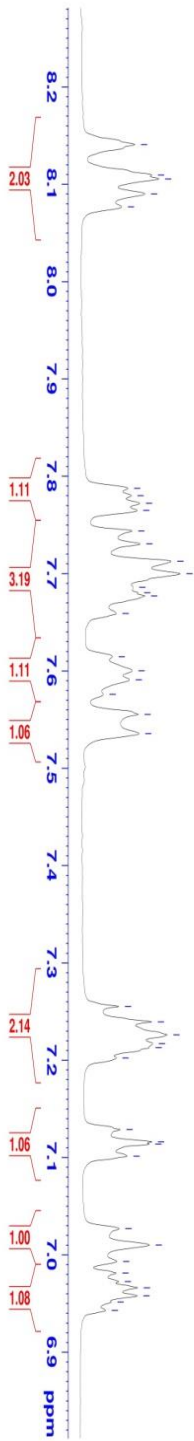

8.141  
8.110  
8.105  
8.090  
8.077

7.787  
7.780  
7.772  
7.765  
7.744  
7.730  
7.713  
7.700  
7.686  
7.680  
7.677  
7.659  
7.615  
7.600  
7.591  
7.576  
7.555  
7.535

C15-MeOD-1H

7.255  
7.239  
7.226  
7.217  
7.213  
7.202

7.129  
7.116  
7.114  
7.101

7.027  
7.010  
6.993  
6.981  
6.973  
6.966  
6.958  
6.951  
6.943

BRUKER

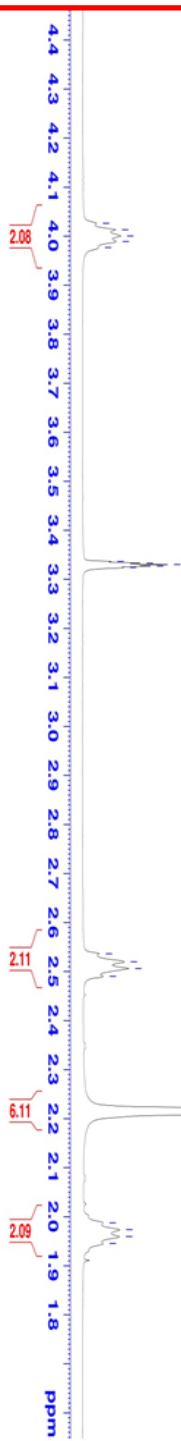

4.026  
4.013  
4.000  
3.989  
3.977

3.336  
3.333  
3.330  
3.327  
3.324

2.537  
2.520  
2.506  
2.490

2.221  
2.211

1.987  
1.974  
1.959  
1.945

C15-MeOD-1H

BRUKER

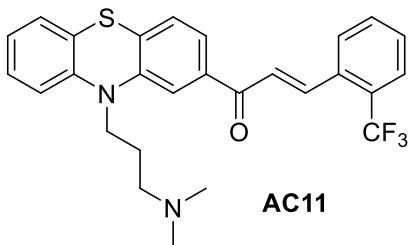

# <sup>13</sup>C-NMR

C15-MeOD-C13CPD

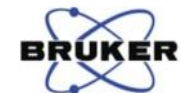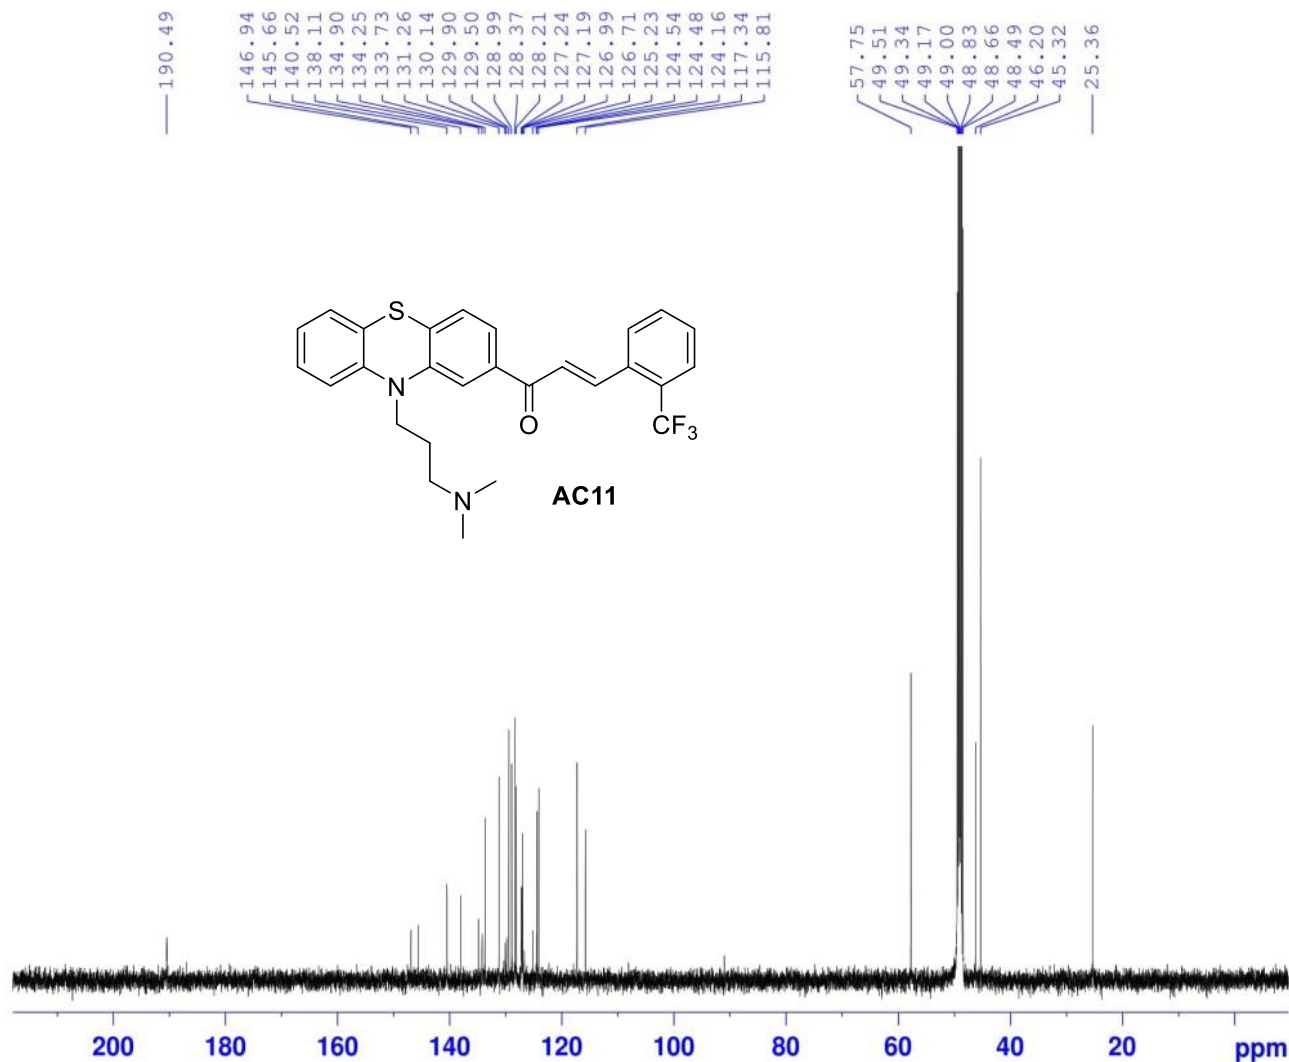

Current Data Parameters  
NAME 113DAO\_C15  
EXPNO 2  
PROCNO 1

F2 - Acquisition Parameters  
Date\_ 20170705  
Time 15.23  
INSTRUM spect  
PROBHD 5 mm PABBO BB/  
PULPROG zgpg30  
TD 65536  
SOLVENT MeOD  
NS 256  
DS 4  
SWH 29761.904 Hz  
FIDRES 0.454131 Hz  
AQ 1.1010048 sec  
RG 198.57  
DW 16.800 usec  
DE 6.50 usec  
TE 303.0 K  
D1 2.00000000 sec  
D11 0.03000000 sec  
TD0 1

==== CHANNEL f1 =====  
SFO1 125.7879670 MHz  
NUC1 13C  
P1 10.00 usec  
PLW1 88.00000000 W

==== CHANNEL f2 =====  
SFO2 500.2020008 MHz  
NUC2 1H  
CPDPRG[2] waltz16  
PCPD2 80.00 usec  
PLW2 22.00000000 W  
PLW12 0.34375000 W  
PLW13 0.22000000 W

F2 - Processing parameters  
SI 32768  
SF 125.7752168 MHz  
WDW EM  
SSB 0  
LB 1.00 Hz  
GB 0  
PC 1.40

# $^{13}\text{C}$ -NMR

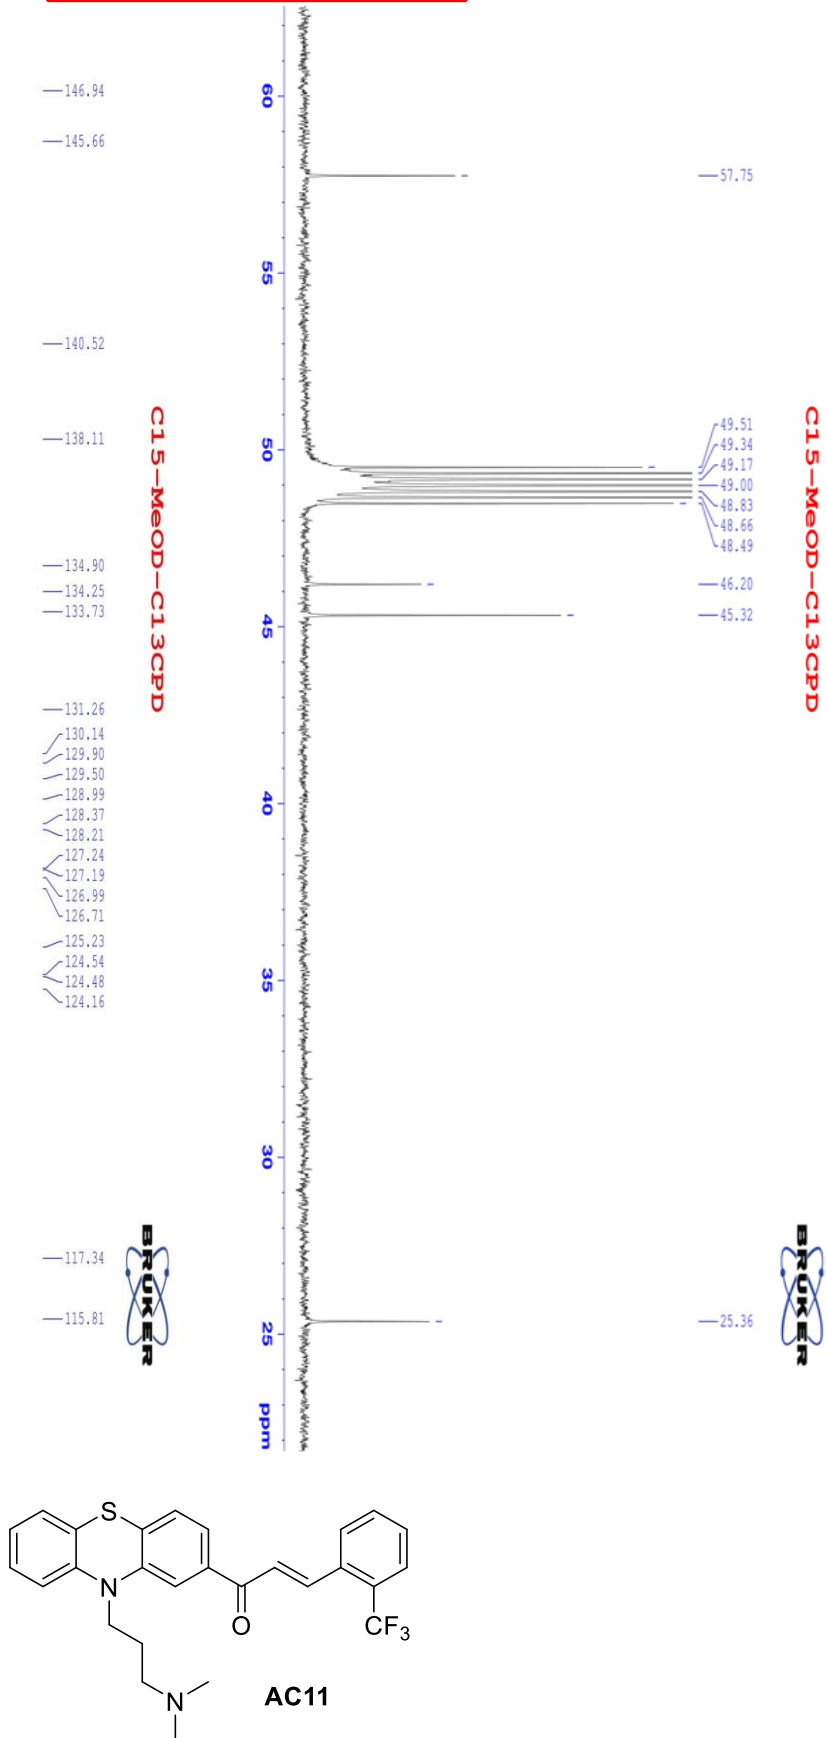

IR

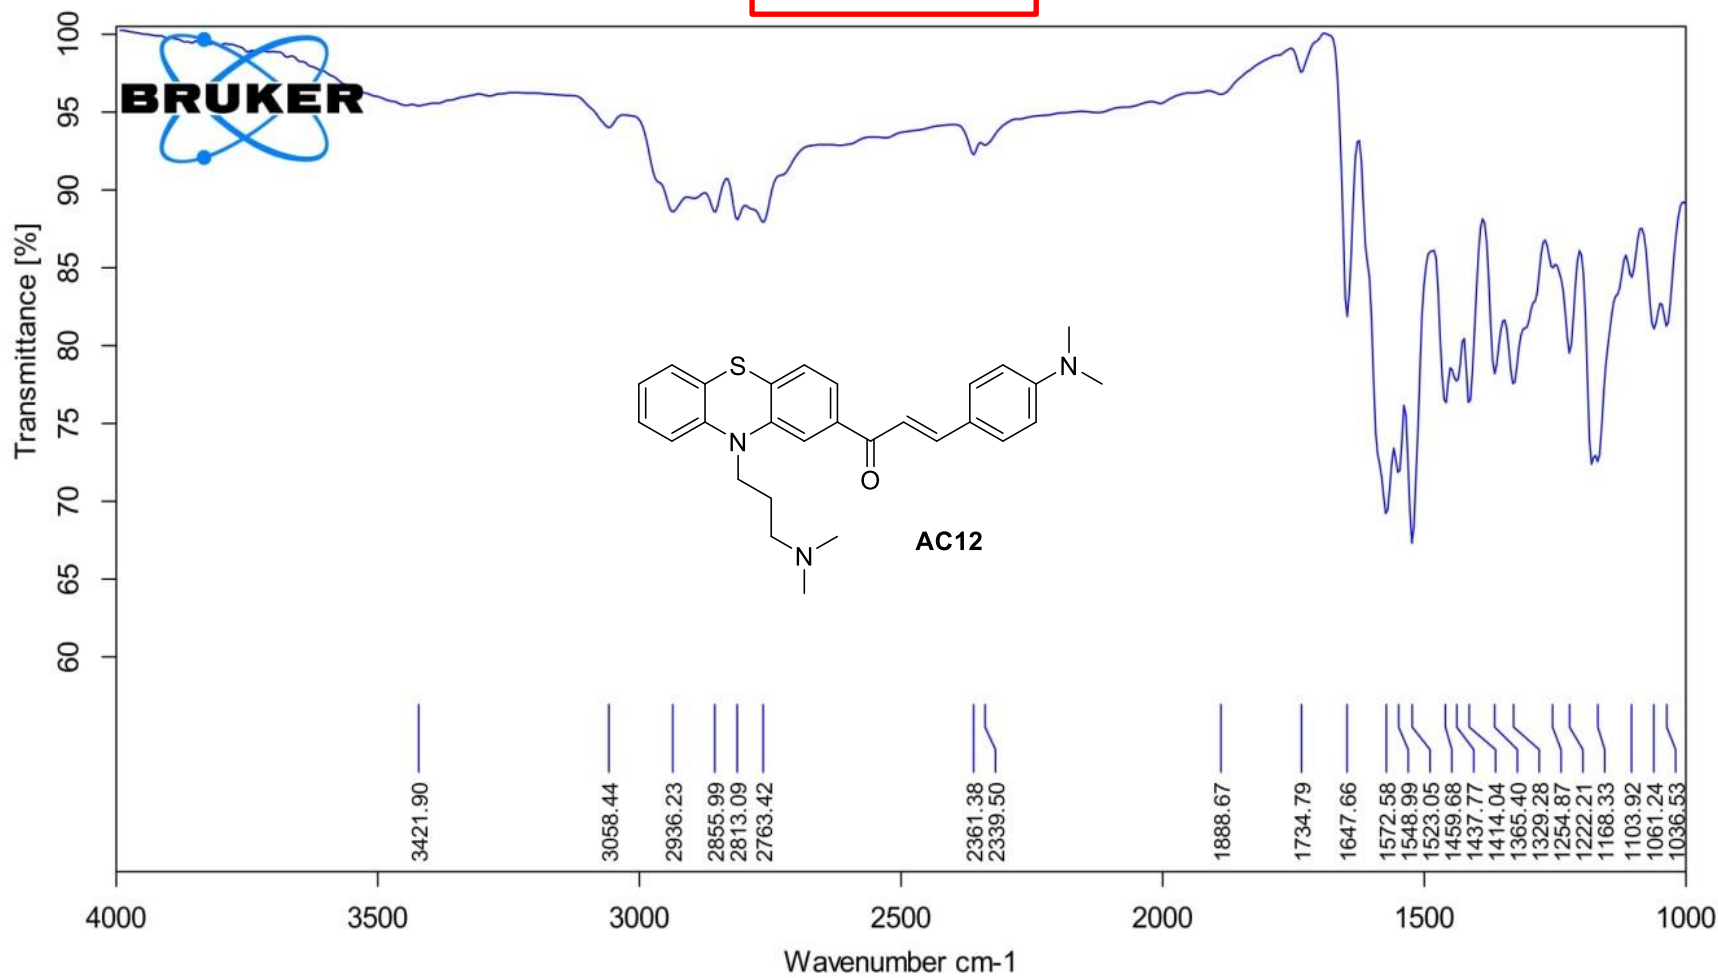

|                                      |    |                              |          |
|--------------------------------------|----|------------------------------|----------|
| E:\OPUS 7\2017\THANG 6\20170606\C7.0 | C7 | TENSOR 27 - BRUKER - GERMANY | 6/8/2017 |
|--------------------------------------|----|------------------------------|----------|

# MS

## Qualitative Analysis Report

|                               |                       |                       |                             |
|-------------------------------|-----------------------|-----------------------|-----------------------------|
| <b>Data Filename</b>          | 12-AC12.d             | <b>Sample Name</b>    | 12-AC12                     |
| <b>Sample Type</b>            | Sample                | <b>Position</b>       | P2-B9                       |
| <b>Instrument Name</b>        | Instrument 1          | <b>User Name</b>      |                             |
| <b>Acq Method</b>             | Cot ngan - MSMS_Pos.m | <b>Acquired Time</b>  | 22/08/2020 11:50:36 AM      |
| <b>IRM Calibration Status</b> | Success               | <b>DA Method</b>      | COTNGAN.M.m                 |
| <b>Comment</b>                |                       |                       |                             |
| <b>Sample Group</b>           |                       | <b>Info.</b>          |                             |
| <b>Stream Name</b>            | LC 1                  | <b>Acquisition SW</b> | 6200 series TOF/6500 series |
|                               |                       | <b>Version</b>        | Q-TOF B.06.01 (B6172 SP1)   |

### User Chromatograms

Fragmentor Voltage 140 Collision Energy 0 Ionization Mode ESI

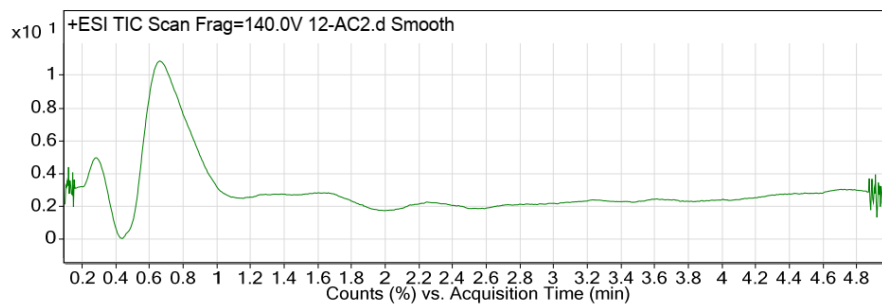

### User Spectra

Fragmentor Voltage 140 Collision Energy 0 Ionization Mode ESI

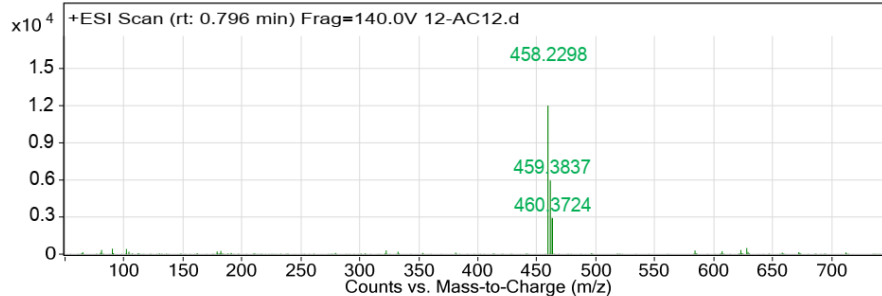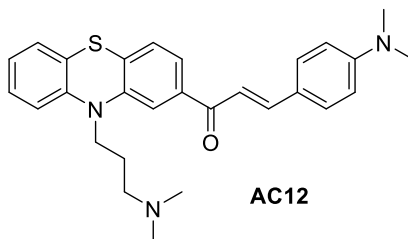

--- End Of Report ---

# MS

|               |           |             |                      |                 |              |                        |                        |
|---------------|-----------|-------------|----------------------|-----------------|--------------|------------------------|------------------------|
| Sample Name   | 12-AC12   | Position    | P2-B9                | Instrument Name | Instrument 1 | User Name              |                        |
| Inj Vol       | 2         | InjPosition |                      | SampleType      | Sample       | IRM Calibration Status | Success                |
| Data Filename | 12-AC12.d | ACQ Method  | Cot ngan - MSMS_Pos. | Comment         |              | Acquired Time          | 22/08/2020 11:50:36 AM |

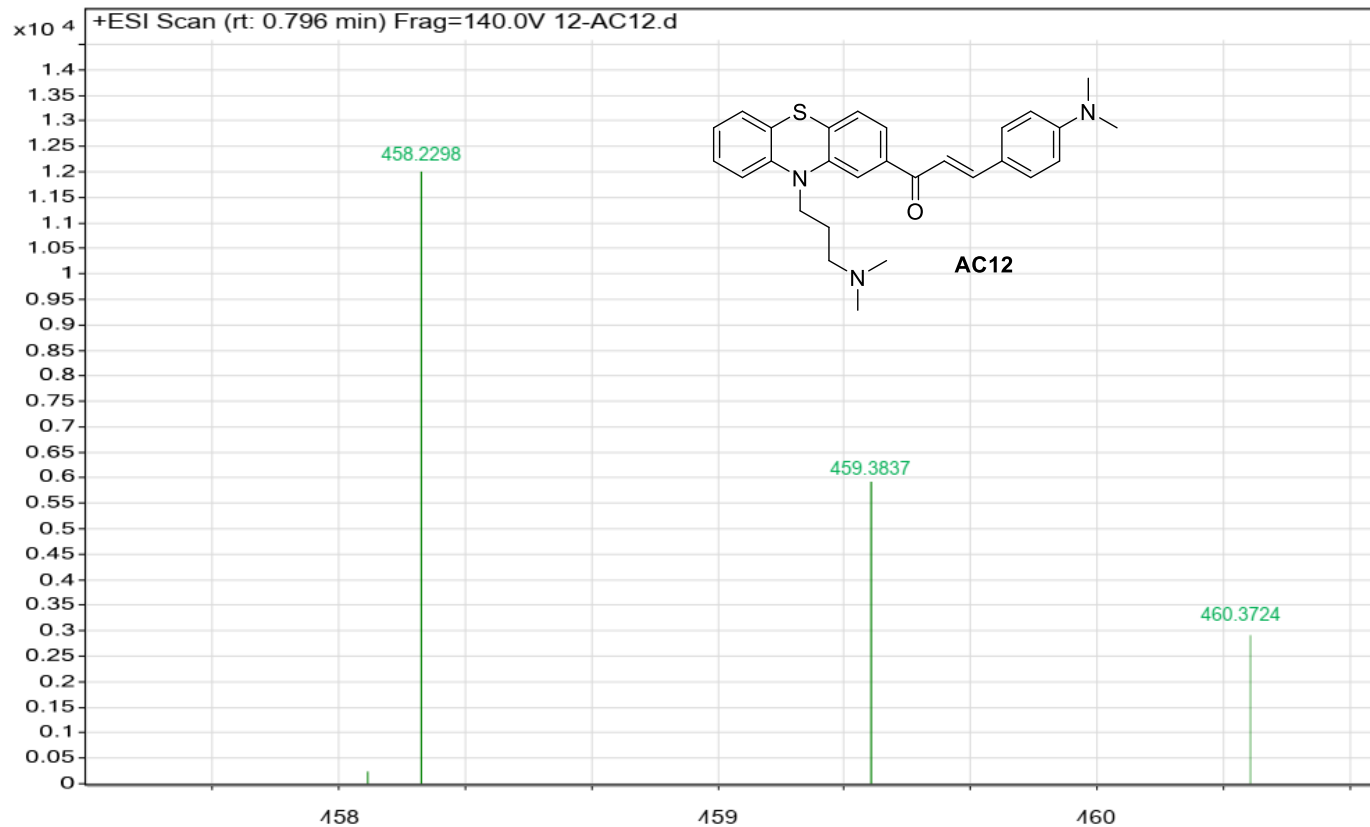



# <sup>1</sup>H-NMR

C7-MeOD-1H

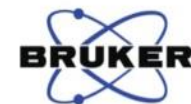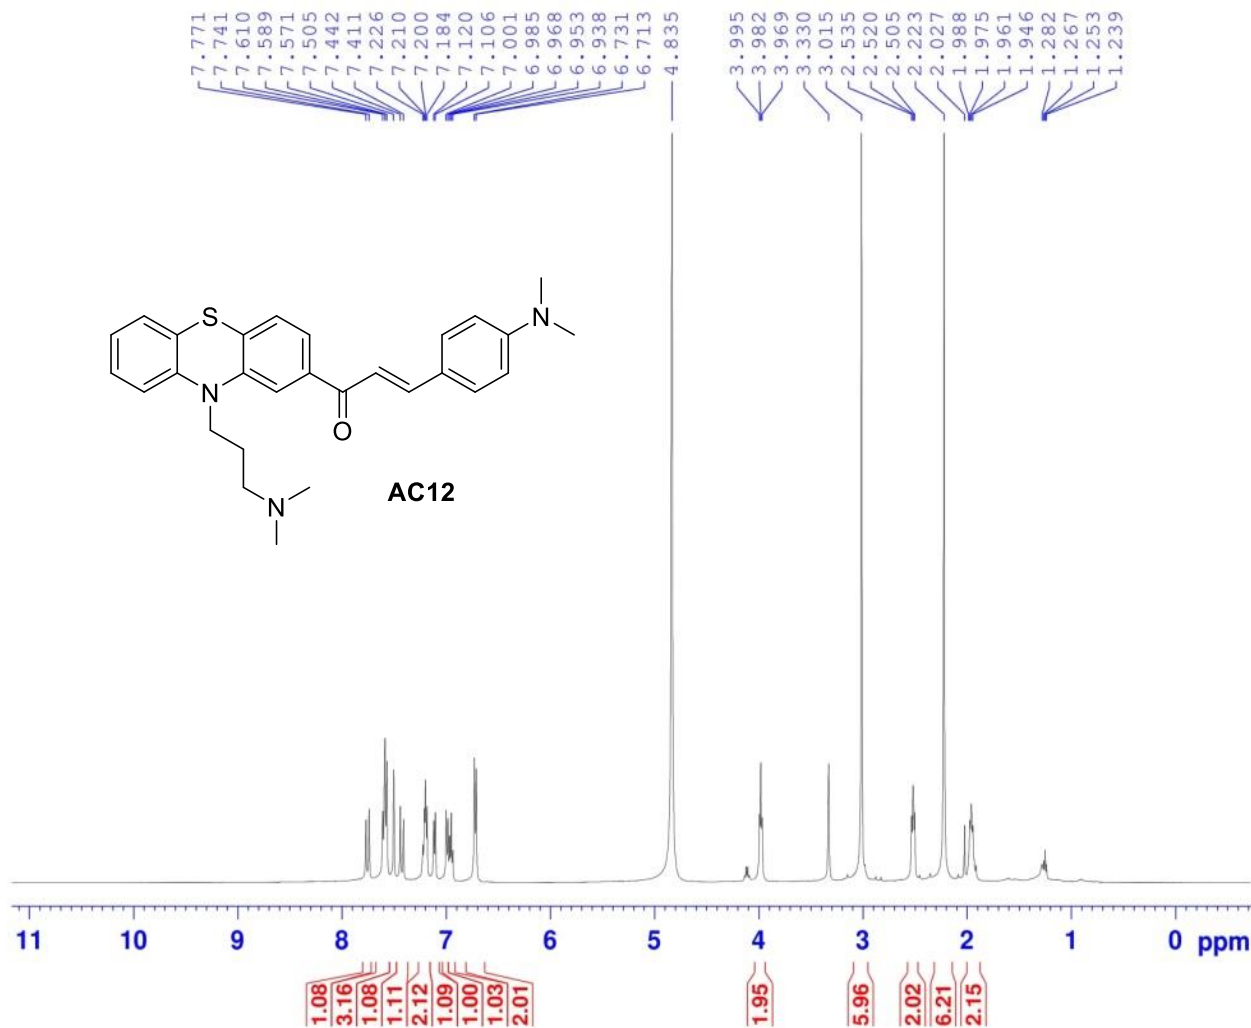

Current Data Parameters  
NAME 113DAO\_C7  
EXPNO 1  
PROCNO 1

F2 - Acquisition Parameters  
Date\_ 20170704  
Time 16.50  
INSTRUM spect  
PROBHD 5 mm PABBO BB/  
PULPROG zg30  
TD 65536  
SOLVENT MeOD  
NS 16  
DS 2  
SWH 10000.000 Hz  
FIDRES 0.152588 Hz  
AQ 3.2767999 sec  
RG 79.36  
DW 50.000 usec  
DE 6.50 usec  
TE 303.0 K  
D1 1.00000000 sec  
TD0 1

----- CHANNEL f1 -----  
SFO1 500.2030889 MHz  
NUC1 1H  
P1 10.00 usec  
PLW1 22.00000000 W

F2 - Processing parameters  
SI 65536  
SF 500.2000020 MHz  
WDW EM  
SSB 0  
LB 0.30 Hz  
GB 0  
PC 1.00

# <sup>1</sup>H-NMR

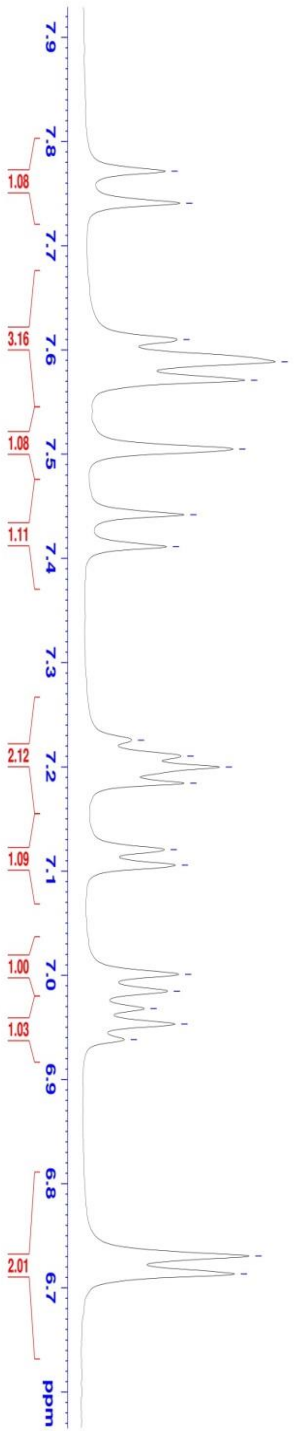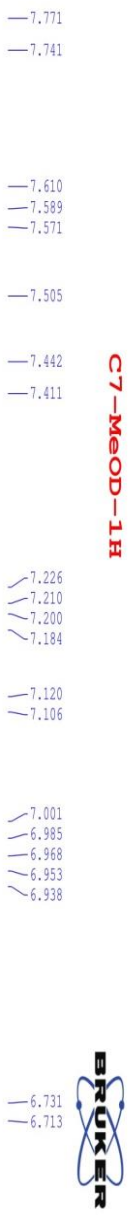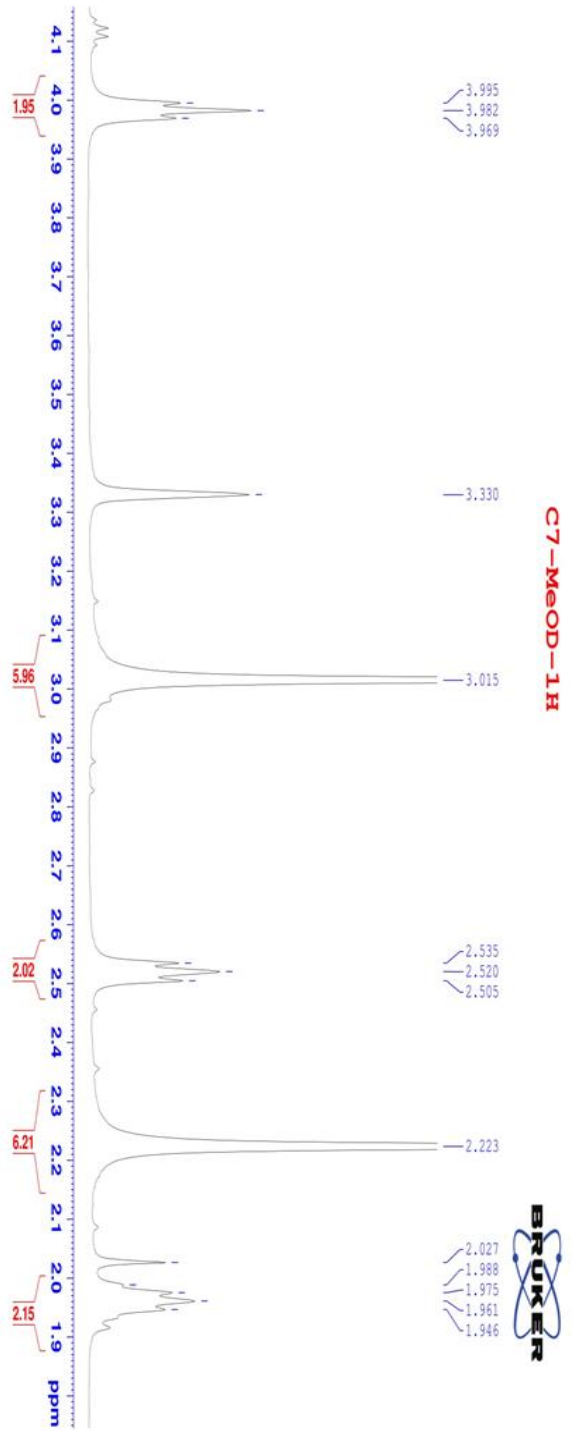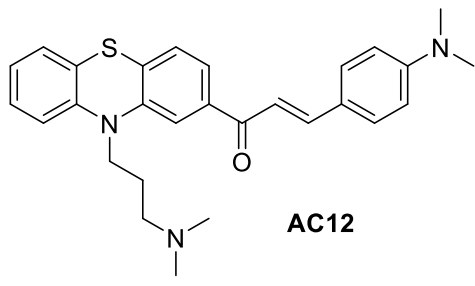

# <sup>13</sup>C-NMR

C7-MeOD-C13CPD

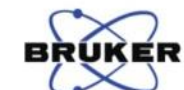

Current Data Parameters  
NAME 113DAO\_C7  
EXPNO 2  
PROCNO 1

F2 - Acquisition Parameters  
Date\_ 20170704  
Time 17.00  
INSTRUM spect  
PROBHD 5 mm PABBO BB/  
PULPROG zgpg30  
TD 65536  
SOLVENT MeOD  
NS 128  
DS 4  
SWH 29761.904 Hz  
FIDRES 0.454131 Hz  
AQ 1.1010048 sec  
RG 198.57  
DW 16.800 usec  
DE 6.50 usec  
TE 303.0 K  
D1 2.00000000 sec  
D11 0.03000000 sec  
TDO 1

===== CHANNEL f1 =====  
SFO1 125.7879670 MHz  
NUC1 13C  
P1 10.00 usec  
PLW1 88.00000000 W

===== CHANNEL f2 =====  
SFO2 500.2020008 MHz  
NUC2 1H  
CPDPRG[2] waltz16  
PCPD2 80.00 usec  
PLW2 22.00000000 W  
PLW12 0.34375000 W  
PLW13 0.22000000 W

F2 - Processing parameters  
SI 32768  
SF 125.7752164 MHz  
WDW EM  
SSB 0  
LB 1.00 Hz  
GB 0  
PC 1.40

191.49

153.98  
147.83  
146.73  
145.83  
139.38  
132.95  
131.91  
128.91  
128.37  
128.08  
125.45  
124.06  
123.75  
117.28  
116.95  
115.79  
113.00

57.75  
49.51  
49.34  
49.17  
49.00  
48.83  
48.66  
48.49  
46.16  
45.28  
40.21  
25.34

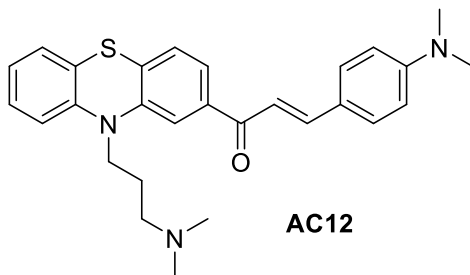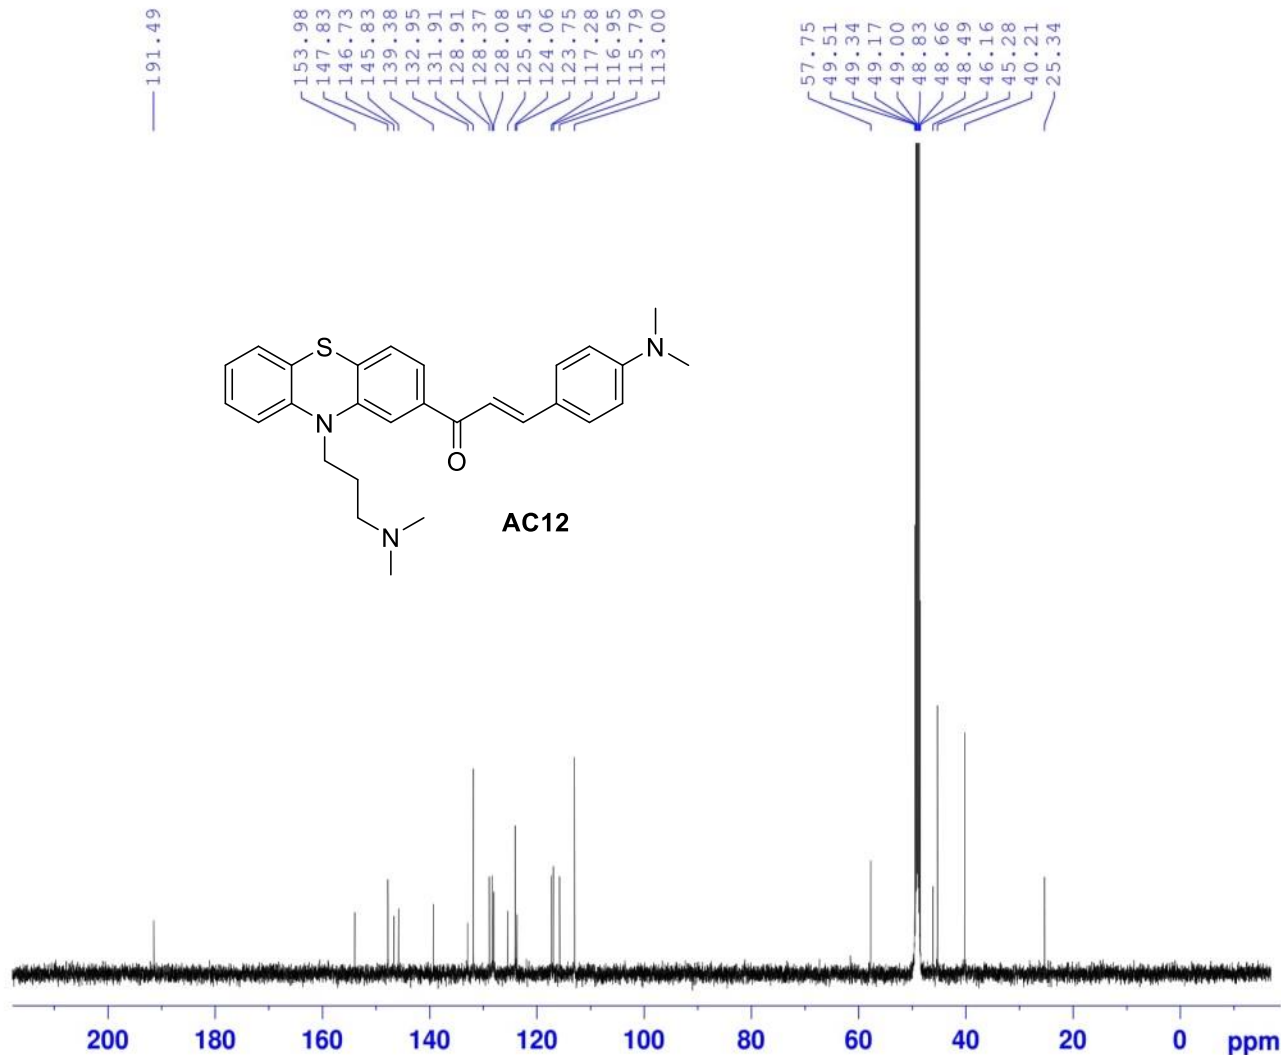

# $^{13}\text{C}$ -NMR

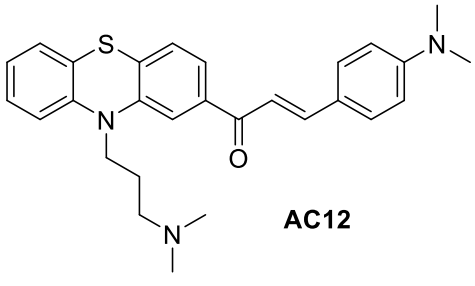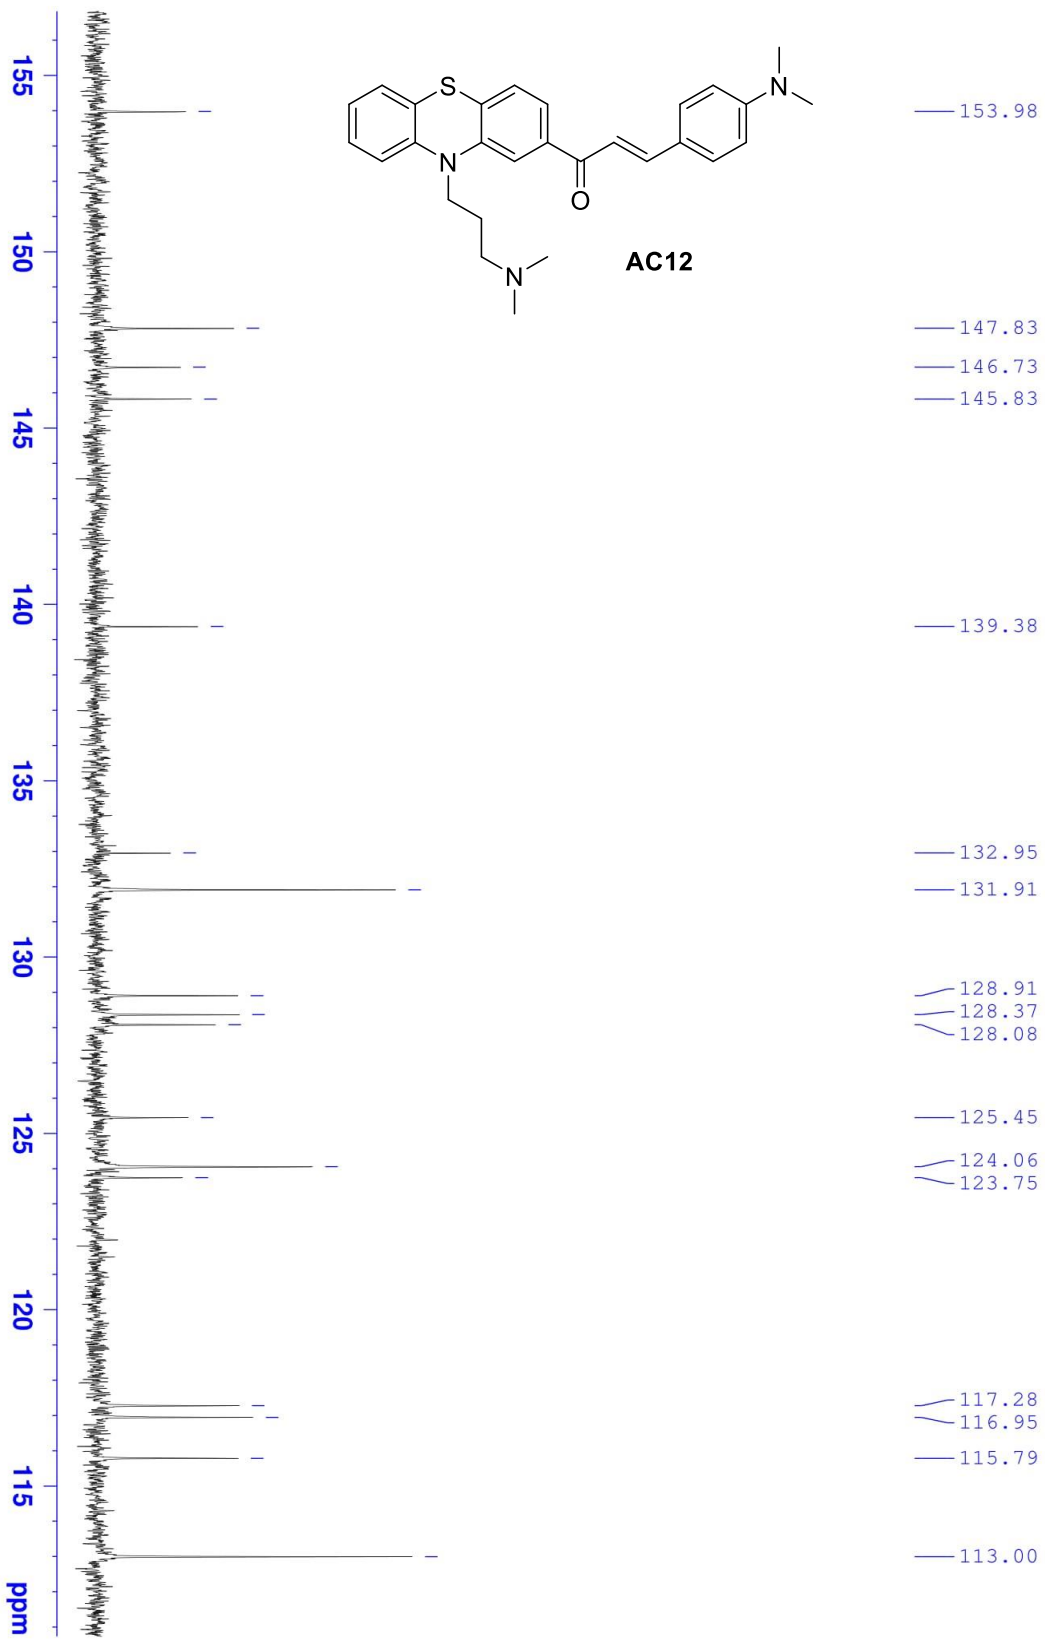

C7-MeOD-C13CPD

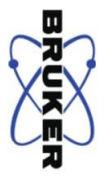

IR

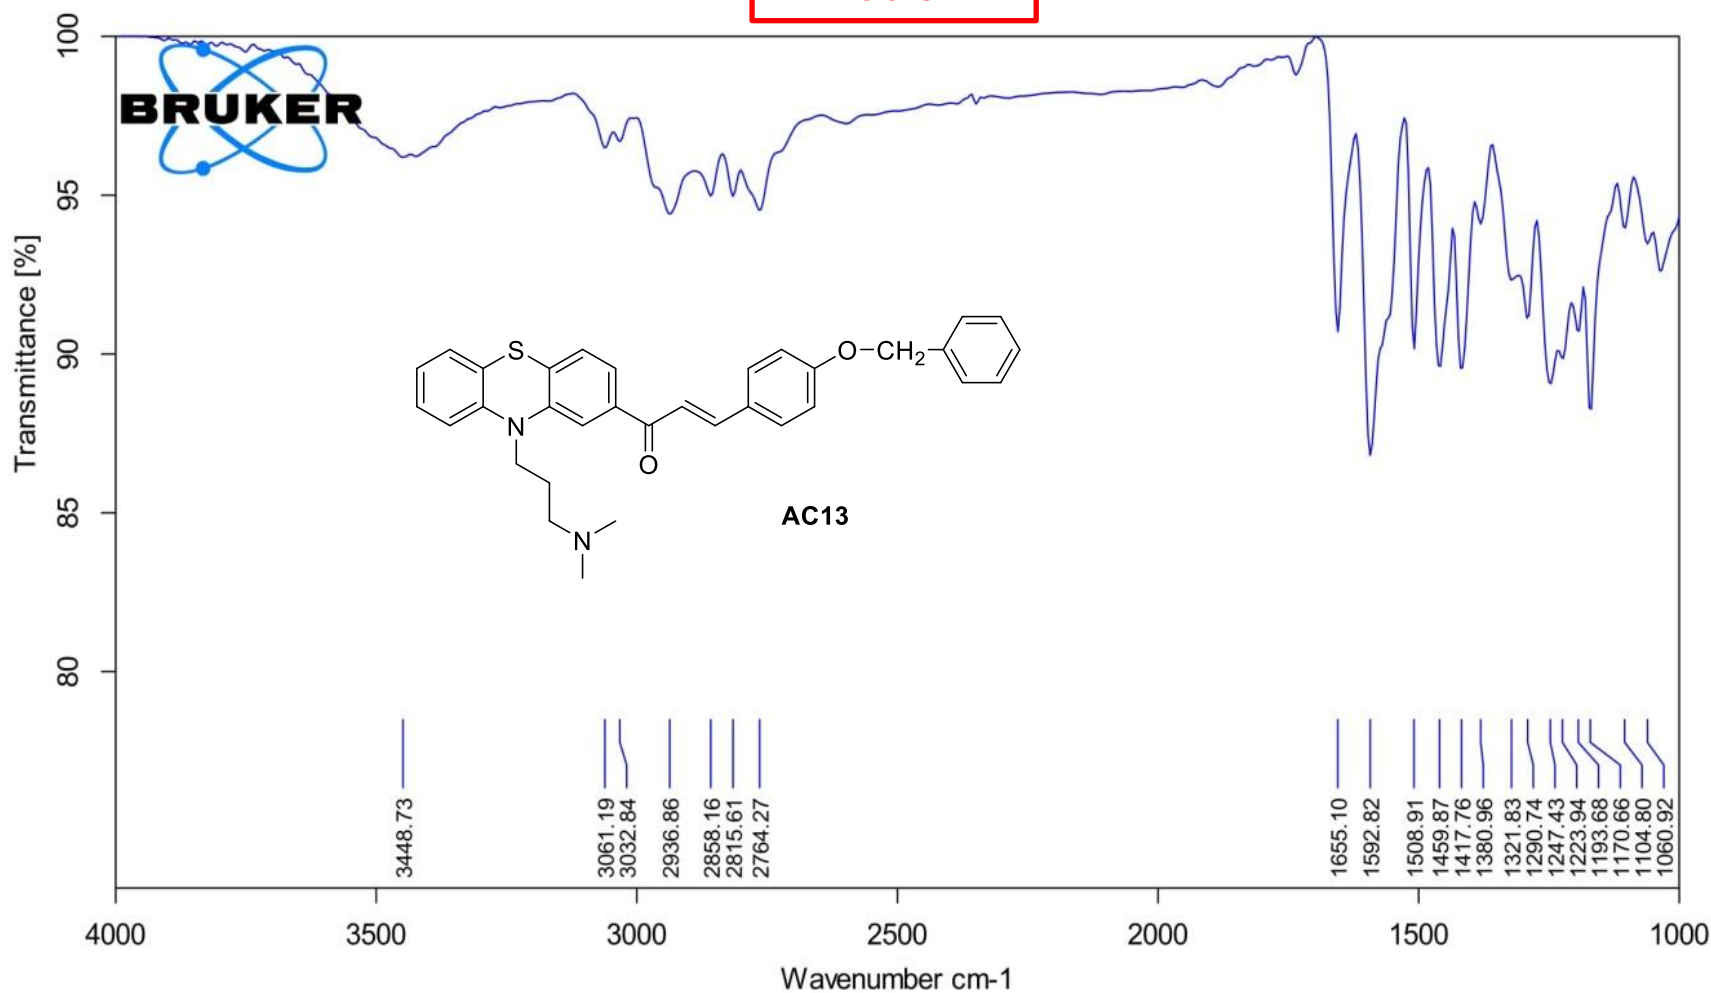

# MS

## Qualitative Analysis Report

|                               |                       |                       |                             |
|-------------------------------|-----------------------|-----------------------|-----------------------------|
| <b>Data Filename</b>          | 13-AC13.d             | <b>Sample Name</b>    | 13-AC13                     |
| <b>Sample Type</b>            | Sample                | <b>Position</b>       | P2-C2                       |
| <b>Instrument Name</b>        | Instrument 1          | <b>User Name</b>      |                             |
| <b>Acq Method</b>             | Cot ngan - MSMS_Pos.m | <b>Acquired Time</b>  | 22/08/2020 12:00:43 PM      |
| <b>IRM Calibration Status</b> | Success               | <b>DA Method</b>      | COTNGAN.M.m                 |
| <b>Comment</b>                |                       |                       |                             |
| <b>Sample Group</b>           |                       | <b>Info.</b>          |                             |
| <b>Stream Name</b>            | LC 1                  | <b>Acquisition SW</b> | 6200 series TOF/6500 series |
|                               |                       | <b>Version</b>        | Q-TOF B.06.01 (B6172 SP1)   |

+ESI TIC Scan Frag=140.0V BTBZ 9.d Smooth

### User Chromatograms

Fragmentor Voltage 140 Collision Energy 0 Ionization Mode ESI

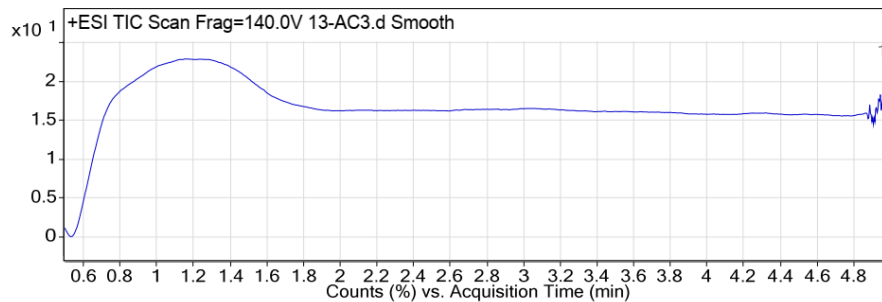

### User Spectra

Fragmentor Voltage 140 Collision Energy 0 Ionization Mode ESI

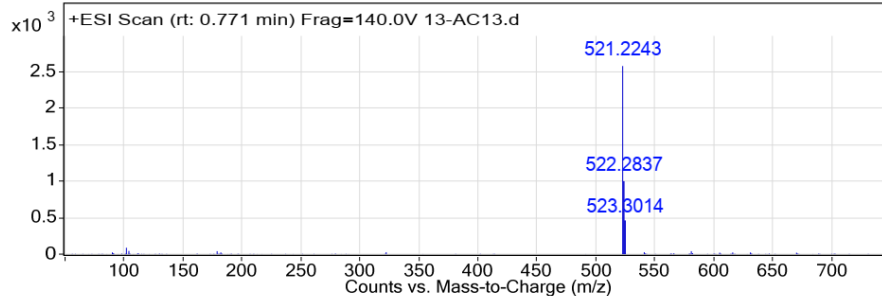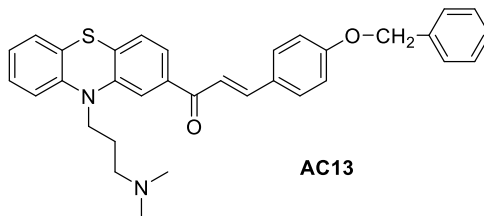

--- End Of Report ---

# MS

|               |           |             |                      |                 |              |                        |                        |
|---------------|-----------|-------------|----------------------|-----------------|--------------|------------------------|------------------------|
| Sample Name   | 13-AC13   | Position    | P2-C2                | Instrument Name | Instrument 1 | User Name              |                        |
| Inj Vol       | 2         | InjPosition |                      | SampleType      | Sample       | IRM Calibration Status | Success                |
| Data Filename | 13-AC13.d | ACQ Method  | Cot ngan - MSMS_Pos. | Comment         |              | Acquired Time          | 22/08/2020 12:00:43 PM |

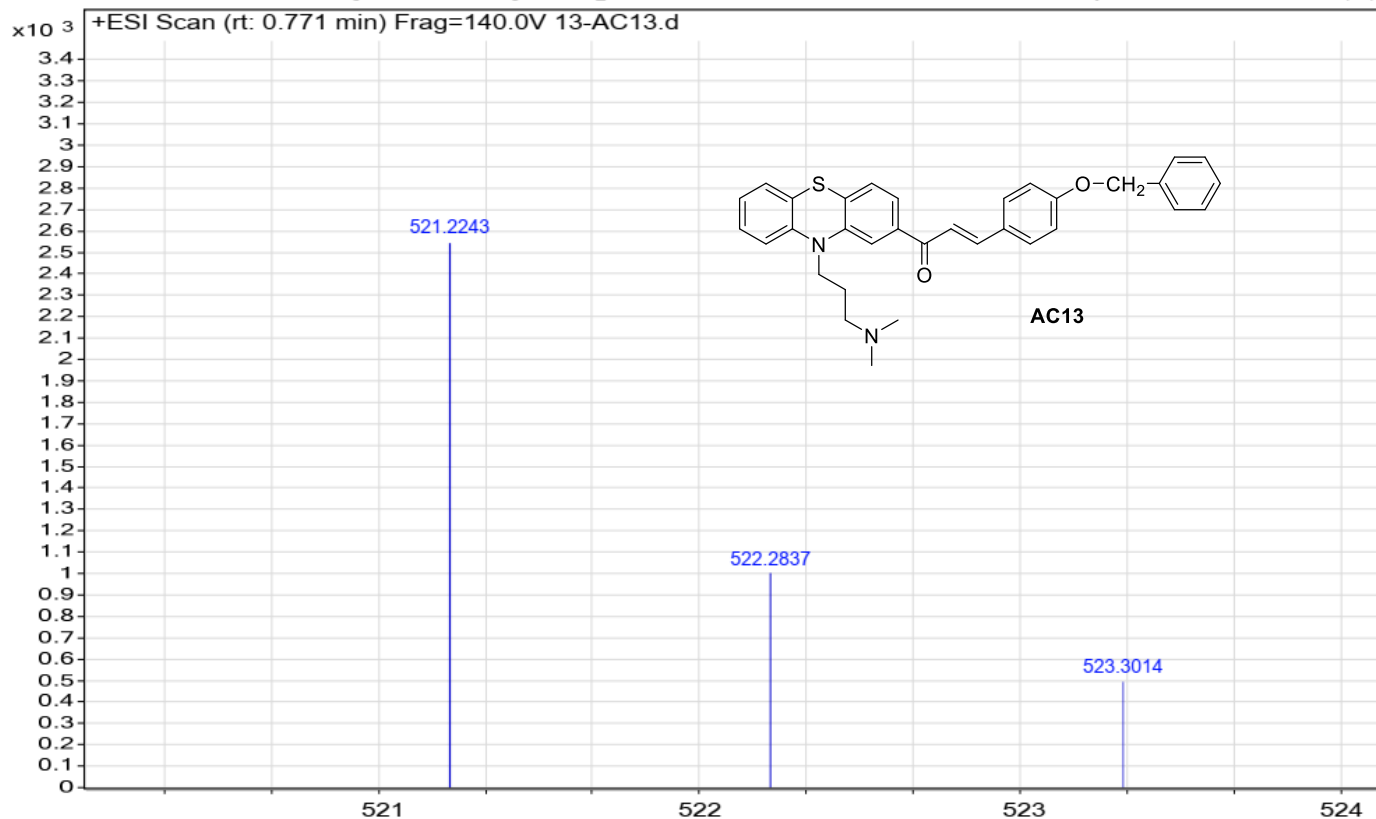

# <sup>1</sup>H-NMR

C5-MeOD+DMSO-1H

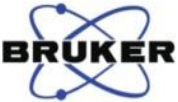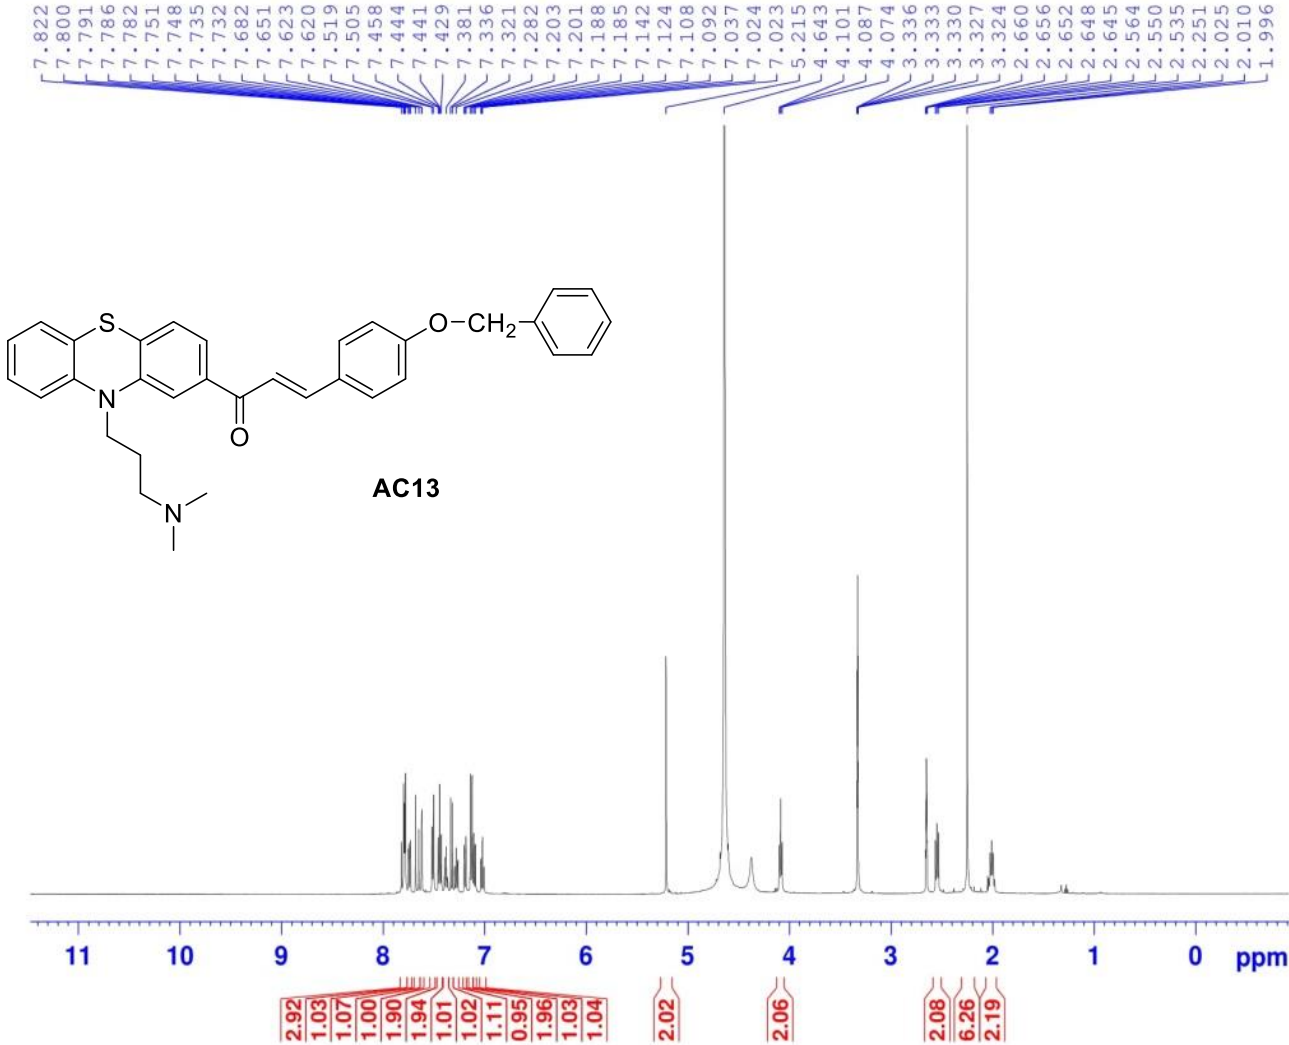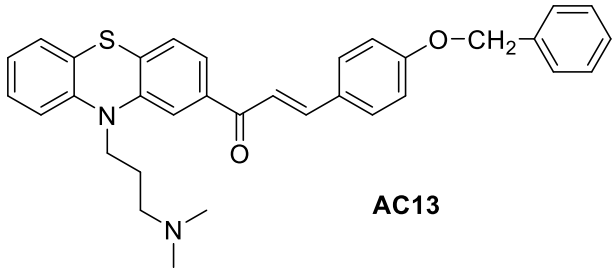

Current Data Parameters  
NAME 113D\_C5  
EXPNO 1  
PROCNO 1

F2 - Acquisition Parameters  
Date\_ 20170607  
Time 10.47  
INSTRUM spect  
PROBHD 5 mm PABBO BB/  
PULPROG zg30  
TD 65536  
SOLVENT MeOD  
NS 16  
DS 2  
SWH 10000.000 Hz  
FIDRES 0.152588 Hz  
AQ 3.2767999 sec  
RG 111.09  
DW 50.000 usec  
DE 6.50 usec  
TE 303.0 K  
D1 1.00000000 sec  
TD0 1

==== CHANNEL f1 =====  
SFO1 500.2030889 MHz  
NUC1 1H  
P1 10.00 usec  
PLW1 22.00000000 W

F2 - Processing parameters  
SI 65536  
SF 500.2000003 MHz  
WDW EM  
SSB 0  
LB 0.30 Hz  
GB 0  
PC 1.00



# <sup>1</sup>H-NMR

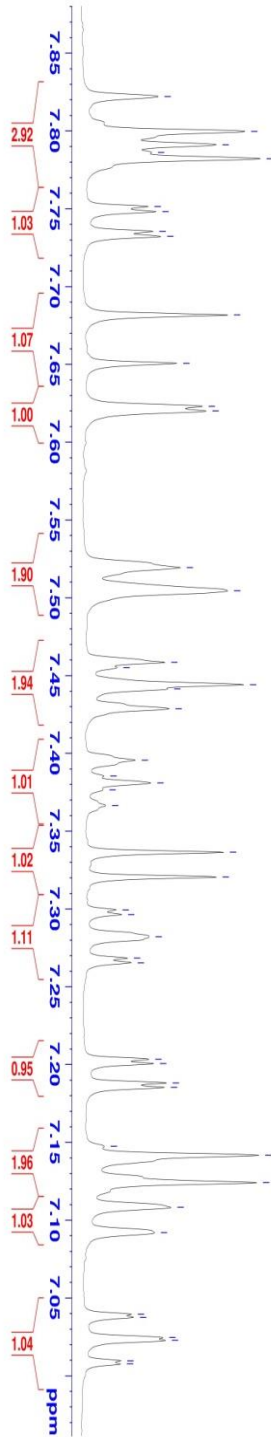

7.822  
7.800  
7.791  
7.786  
7.782  
7.751  
7.748  
7.735  
7.732

7.682  
7.651  
7.623  
7.620

7.519  
7.505

7.458  
7.455  
7.444  
7.441  
7.429  
7.396  
7.385  
7.381  
7.377  
7.366  
7.336  
7.321  
7.299  
7.296  
7.282  
7.268  
7.265

7.203  
7.201  
7.188  
7.185

7.147  
7.142  
7.124  
7.108  
7.092

7.040  
7.037  
7.024  
7.023  
7.010  
7.008

C5-MeOD+DMSO-1H

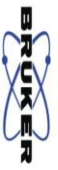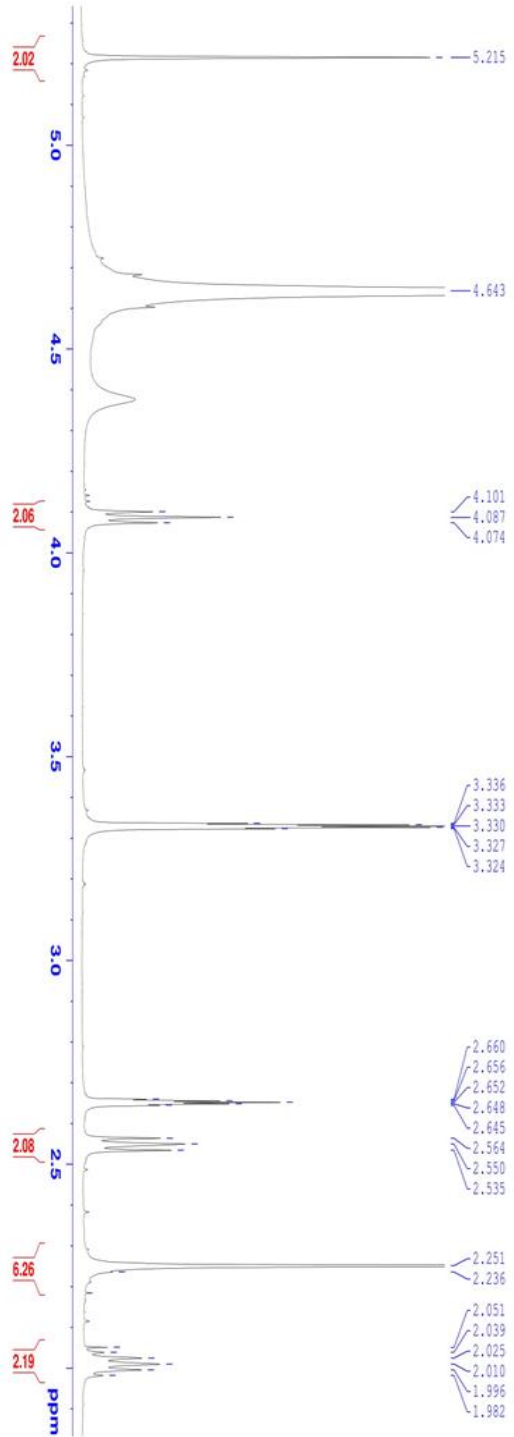

C5-MeOD+DMSO-1H

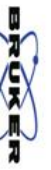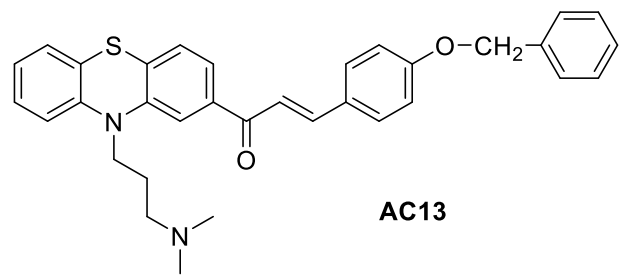

# <sup>13</sup>C-NMR

C5-MeOD+DMSO-C13CPD

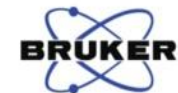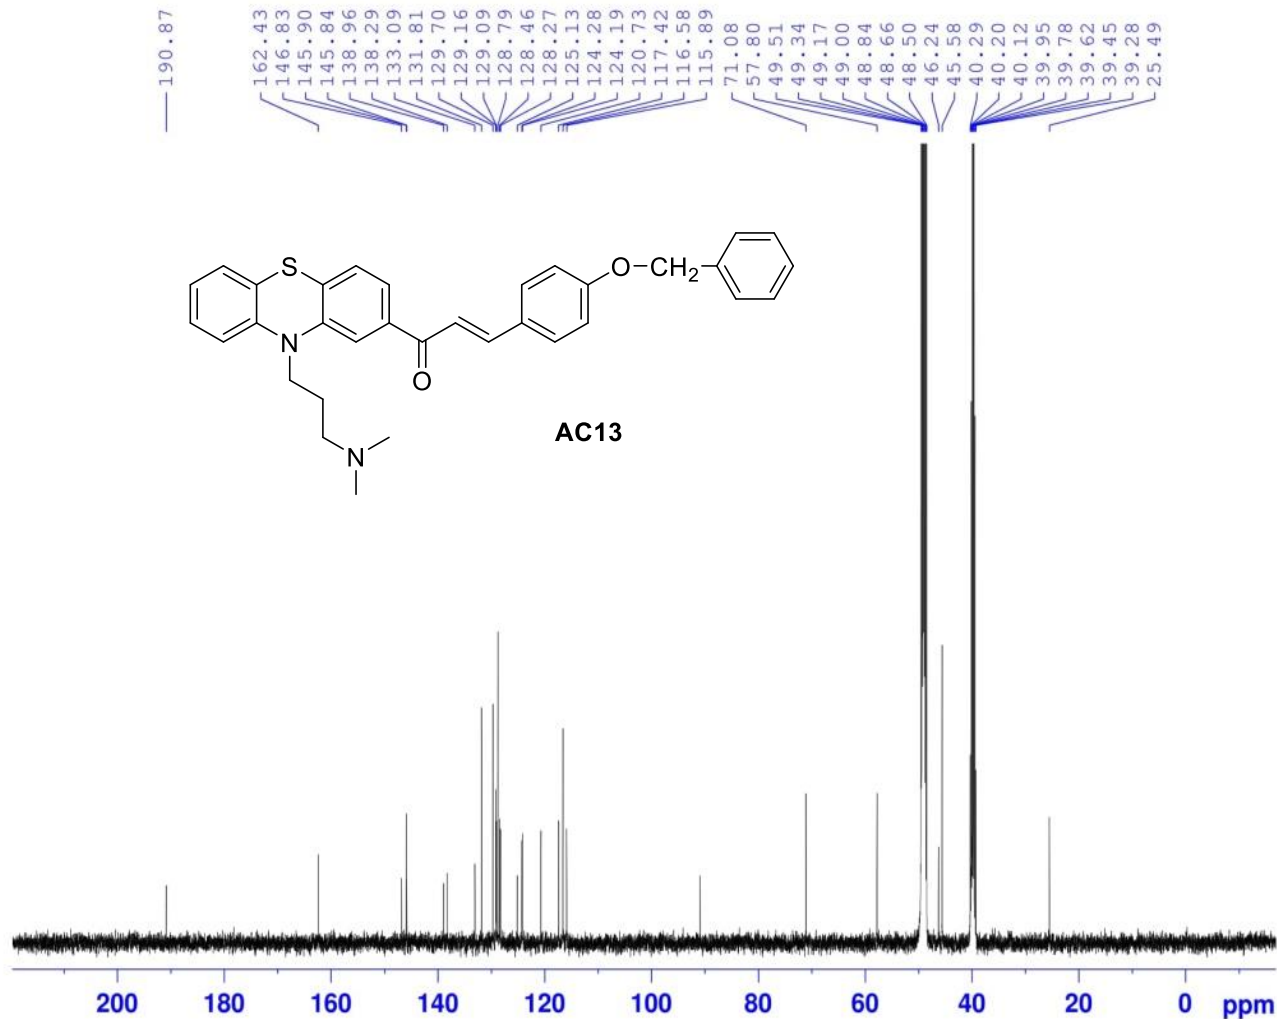

Current Data Parameters  
NAME 113D\_C5  
EXPNO 2  
PROCNO 1

F2 - Acquisition Parameters  
Date\_ 20170607  
Time 13.48  
INSTRUM spect  
PROBHD 5 mm PABBO BB/  
PULPROG zgpg30  
TD 65536  
SOLVENT MeOD  
NS 2048  
DS 4  
SWH 29761.904 Hz  
FIDRES 0.454131 Hz  
AQ 1.1010048 sec  
RG 198.57  
DW 16.800 usec  
DE 6.50 usec  
TE 303.0 K  
D1 2.00000000 sec  
D11 0.03000000 sec  
TD0 1

===== CHANNEL f1 =====  
SFO1 125.7879670 MHz  
NUC1 13C  
P1 10.00 usec  
PLW1 88.00000000 W

===== CHANNEL f2 =====  
SFO2 500.2020008 MHz  
NUC2 1H  
CPDPRG[2] waltz16  
PCPD2 80.00 usec  
PLW2 22.00000000 W  
PLW12 0.34375000 W  
PLW13 0.22000000 W

F2 - Processing parameters  
SI 32768  
SF 125.7753900 MHz  
WDW EM  
SSB 0  
LB 1.00 Hz  
GB 0  
PC 1.40

# $^{13}\text{C}$ -NMR

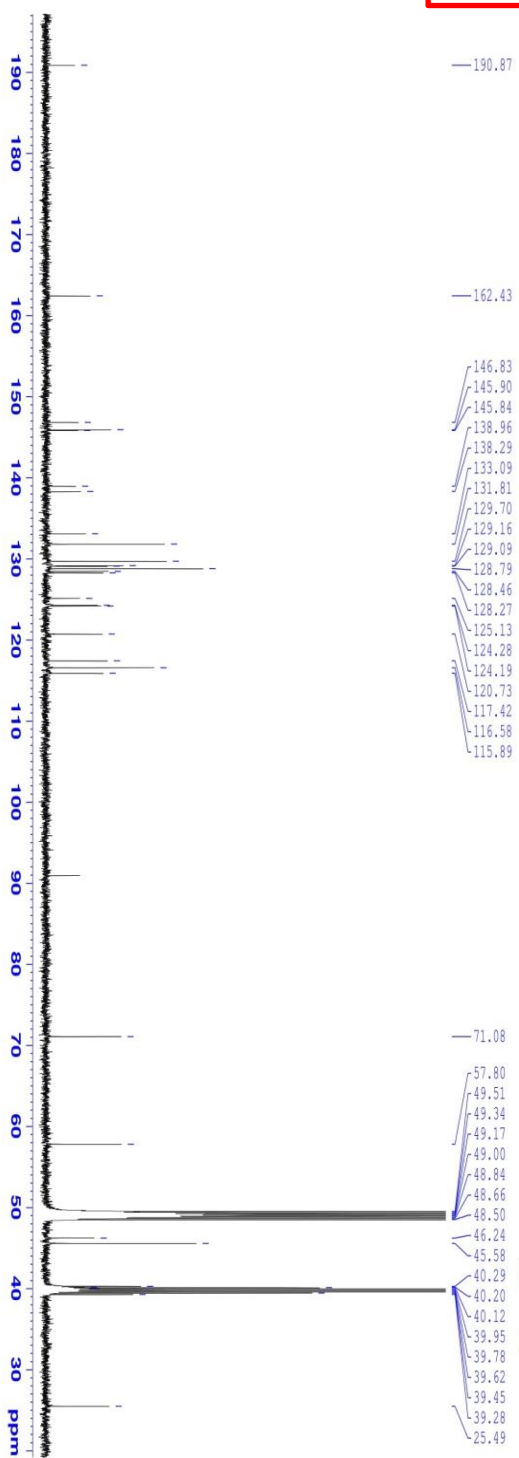

C5-MeOD+DMSO-C13CPD

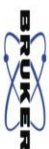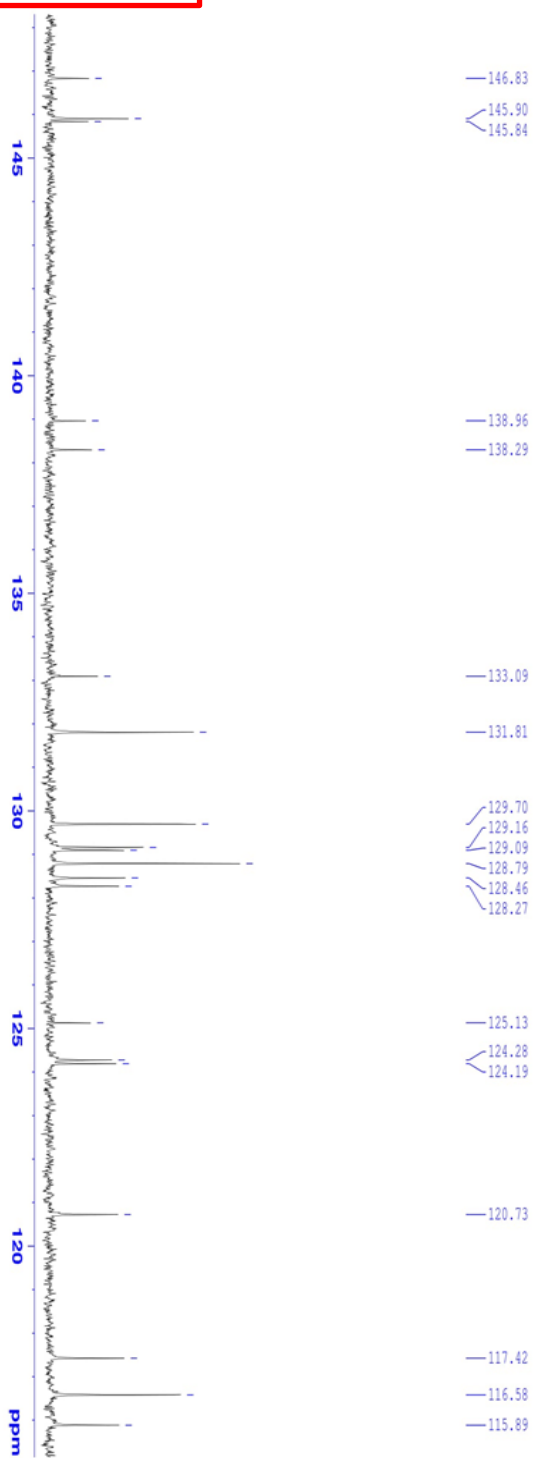

C5-MeOD+DMSO-C13CPD

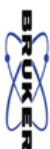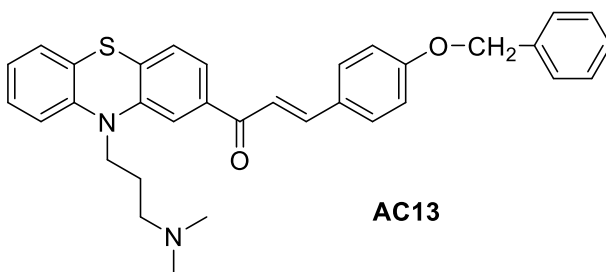

# $^{13}\text{C}$ -NMR

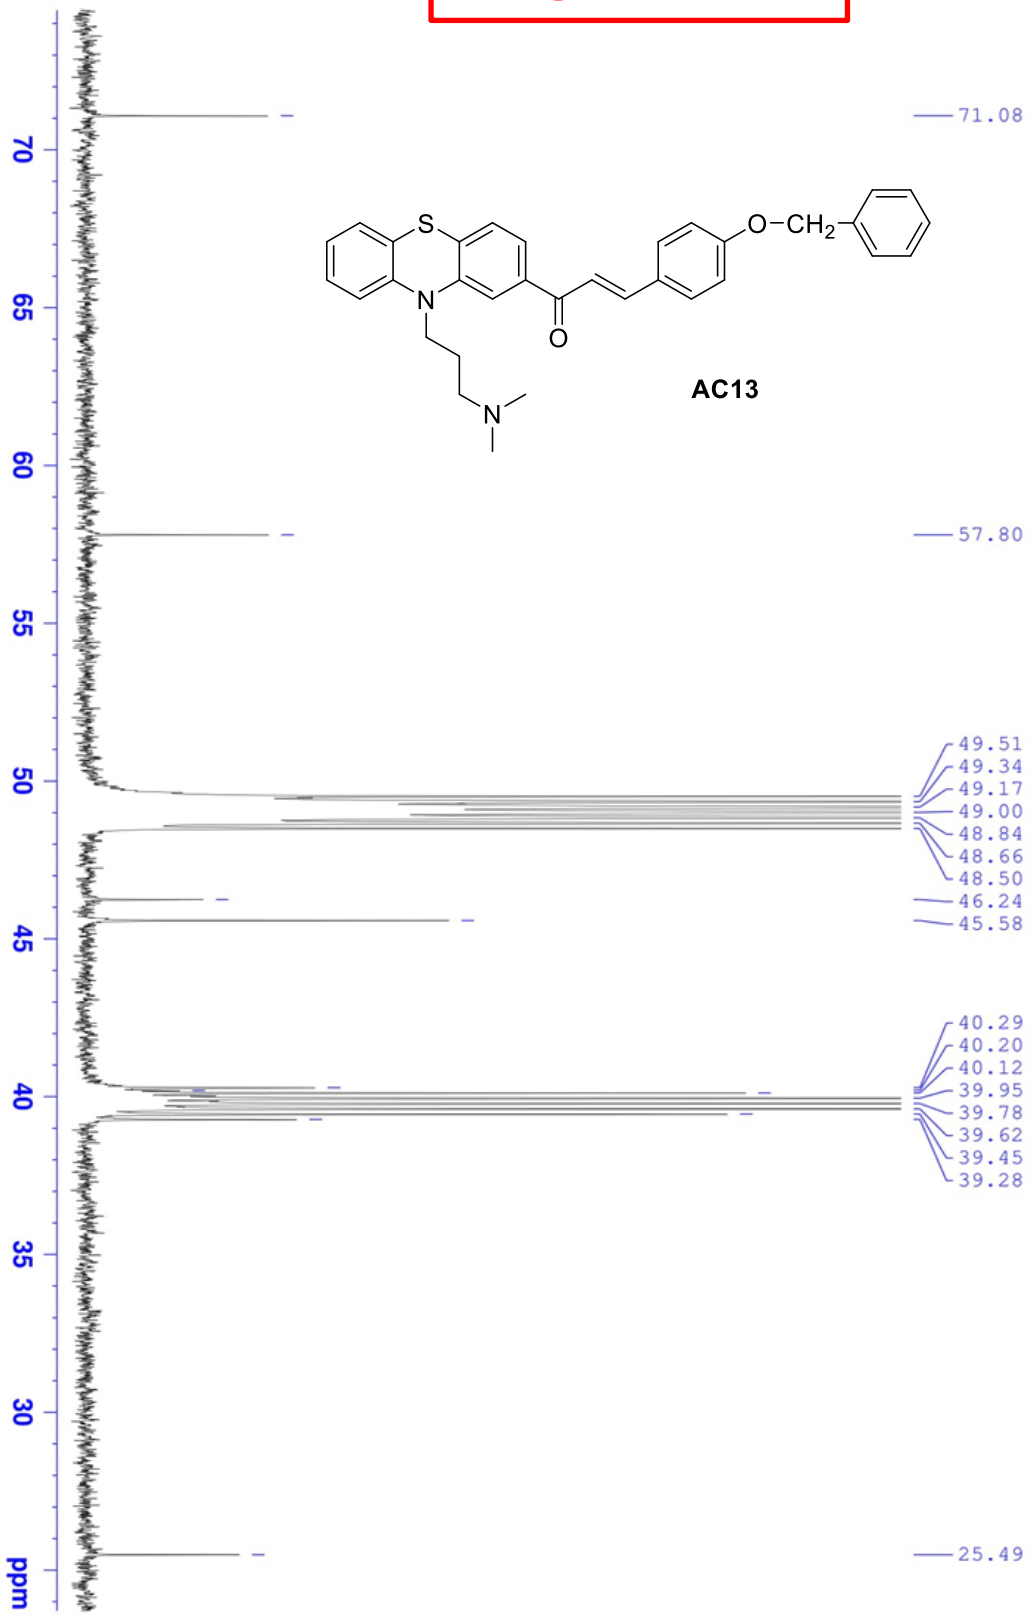

CDCl<sub>3</sub>-MeOD+DMSO-C13CPD

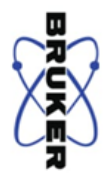

## Reference

1. Thai, K.-M.; Bui, Q.-H.; Tran, T.-D.; Huynh, T.-N.-P. QSAR modeling on benzo[c]phenanthridine analogues as topoisomerase I inhibitors and anti-cancer agents. *Molecules* **2012**, *17*, 5690-5712, doi:10.3390/molecules17055690.
2. Chirico, N.; Gramatica, P. Real external predictivity of QSAR models: how to evaluate it? Comparison of different validation criteria and proposal of using the concordance correlation coefficient. *J Chem Inf Model* **2011**, *51*, 2320-2335, doi:10.1021/ci200211n.
3. Wildman, S.A.; Crippen, G.M. Prediction of Physicochemical Parameters by Atomic Contributions. *J Chem Inf Comput Sci* **1999**, *39*, 868-873, doi:10.1021/ci990307l.
4. Oprea, T.I. Property distribution of drug-related chemical databases. *Journal of computer-aided molecular design* **2000**, *14*, 251-264, doi:10.1023/a:1008130001697.
